# Supplementary material for: Comparative genomics of Clavibacter michiganensis subspecies, pathogens of important agricultural crops
Source: PLoS One. 2017 Mar 20;12(3):e0172295. doi: 10.1371/journal.pone.0172295 (PMC5358740; doi:10.1371/journal.pone.0172295)
Supplement: S5 Dataset — (XLSX) [file pone.0172295.s005.xlsx]

## Sheet: Results
Dataset 5: Annotated features of Clavibacter michiganesis subsp. capsici strain PF008 generated by PATRIC [23]
Genome	Genome ID	Accession	PATRIC ID	RefSeq Locus Tag	Alt Locus Tag	Feature ID	Annotation	Feature Type	Start	End	Length	Strand	FIGfam ID	PATRIC genus-specific families (PLfams)	PATRIC cross-genus families (PGfams)	Protein ID	AA Length	Gene Symbol	Product
Clavibacter michiganensis strain PF008	28447.7	CP012573	fig|28447.7.peg.1	AES38_00005		PATRIC.28447.7.CP012573.CDS.1.1434.fwd	PATRIC	CDS	1	1434	1434	+	FIG00000441	PLF_1573_00000489	PGF_00417881		477		Chromosomal replication initiator protein DnaA
Clavibacter michiganensis strain PF008	28447.7	CP012573	fig|28447.7.peg.2	AES38_00010		PATRIC.28447.7.CP012573.CDS.2009.3160.fwd	PATRIC	CDS	2009	3160	1152	+	FIG00066425	PLF_1573_00000400	PGF_00421501		383		DNA polymerase III beta subunit (EC 2.7.7.7)
Clavibacter michiganensis strain PF008	28447.7	CP012573	fig|28447.7.peg.3	AES38_00015		PATRIC.28447.7.CP012573.CDS.3181.4068.fwd	PATRIC	CDS	3181	4068	888	+	FIG00000405	PLF_1573_00001495	PGF_00427299		295		6-phosphogluconate dehydrogenase, decarboxylating (EC 1.1.1.44)
Clavibacter michiganensis strain PF008	28447.7	CP012573	fig|28447.7.peg.4	AES38_00020		PATRIC.28447.7.CP012573.CDS.4076.5281.fwd	PATRIC	CDS	4076	5281	1206	+	FIG00000412	PLF_1573_00000405	PGF_00421733		401		DNA recombination and repair protein RecF
Clavibacter michiganensis strain PF008	28447.7	CP012573	fig|28447.7.peg.5	AES38_00025		PATRIC.28447.7.CP012573.CDS.5278.5790.fwd	PATRIC	CDS	5278	5790	513	+	FIG00403940	PLF_1573_00001970	PGF_00067709		170		Zn-ribbon-containing, possibly RNA-binding protein and truncated derivatives
Clavibacter michiganensis strain PF008	28447.7	CP012573	fig|28447.7.peg.6	AES38_00030		PATRIC.28447.7.CP012573.CDS.5979.8024.fwd	PATRIC	CDS	5979	8024	2046	+	FIG00028203	PLF_1573_00000398	PGF_00421264		681		DNA gyrase subunit B (EC 5.99.1.3)
Clavibacter michiganensis strain PF008	28447.7	CP012573	fig|28447.7.peg.7	AES38_00035		PATRIC.28447.7.CP012573.CDS.8107.10794.fwd	PATRIC	CDS	8107	10794	2688	+	FIG00000080	PLF_1573_00000496	PGF_00421262		895		DNA gyrase subunit A (EC 5.99.1.3)
Clavibacter michiganensis strain PF008	28447.7	CP012573	fig|28447.7.peg.8	AES38_00040		PATRIC.28447.7.CP012573.CDS.10787.11194.fwd	PATRIC	CDS	10787	11194	408	+	FIG00735262	PLF_1573_00000368	PGF_00003705		135		FIG187021: hypothetical protein
Clavibacter michiganensis strain PF008	28447.7	CP012573	fig|28447.7.peg.9	AES38_00055		PATRIC.28447.7.CP012573.CDS.11659.12297.rev	PATRIC	CDS	11659	12297	639	-	FIG00511986	PLF_1573_00000864	PGF_01253341		212		FIG00511987: hypothetical protein
Clavibacter michiganensis strain PF008	28447.7	CP012573	fig|28447.7.peg.10	AES38_00060		PATRIC.28447.7.CP012573.CDS.12407.12946.fwd	PATRIC	CDS	12407	12946	540	+	FIG01955868	PLF_1573_00002447	PGF_00030806		179		Peptidyl-prolyl cis-trans isomerase (EC 5.2.1.8)
Clavibacter michiganensis strain PF008	28447.7	CP012573	fig|28447.7.peg.11	AES38_00065		PATRIC.28447.7.CP012573.CDS.12946.13809.fwd	PATRIC	CDS	12946	13809	864	+	FIG00511301	PLF_1573_00000365	PGF_00003214		287		FIG056164: rhomboid family serine protease
Clavibacter michiganensis strain PF008	28447.7	CP012573	fig|28447.7.peg.12	AES38_00070		PATRIC.28447.7.CP012573.CDS.14221.14418.rev	PATRIC	CDS	14221	14418	198	-	FIG01124317	PLF_1573_00002388	PGF_00002577		65		FIG018426: putative septation inhibitor protein
Clavibacter michiganensis strain PF008	28447.7	CP012573	fig|28447.7.peg.13	AES38_00075		PATRIC.28447.7.CP012573.CDS.14629.15384.fwd	PATRIC	CDS	14629	15384	756	+	FIG01121757	PLF_1573_00000304	PGF_00019600		251		Membrane protein
Clavibacter michiganensis strain PF008	28447.7	CP012573	fig|28447.7.peg.14			PATRIC.28447.7.CP012573.CDS.15387.15545.fwd	PATRIC	CDS	15387	15545	159	+		PLF_1573_00004858	PGF_01253066		52		hypothetical protein
Clavibacter michiganensis strain PF008	28447.7	CP012573	fig|28447.7.peg.15	AES38_00080		PATRIC.28447.7.CP012573.CDS.15542.16180.fwd	PATRIC	CDS	15542	16180	639	+	FIG00132685	PLF_1573_00000445	PGF_00056800		212		Anthranilate synthase, amidotransferase component (EC 4.1.3.27) @ Para-aminobenzoate synthase, amidotransferase component (EC 2.6.1.85)
Clavibacter michiganensis strain PF008	28447.7	CP012573	fig|28447.7.peg.16	AES38_00085		PATRIC.28447.7.CP012573.CDS.16308.18056.rev	PATRIC	CDS	16308	18056	1749	-		PLF_1573_00000738	PGF_01253312		582		Serine/threonine-protein kinase PknB (EC 2.7.11.1)
Clavibacter michiganensis strain PF008	28447.7	CP012573	fig|28447.7.peg.17	AES38_00090		PATRIC.28447.7.CP012573.CDS.18190.20115.rev	PATRIC	CDS	18190	20115	1926	-	FIG00662117	PLF_1573_00000737	PGF_00051506		641		Serine/threonine-protein kinase PknA (EC 2.7.11.1)
Clavibacter michiganensis strain PF008	28447.7	CP012573	fig|28447.7.peg.18	AES38_00095		PATRIC.28447.7.CP012573.CDS.20112.21563.rev	PATRIC	CDS	20112	21563	1452	-	FIG00046929	PLF_1573_00000356	PGF_00416952		483		Cell division protein FtsI [Peptidoglycan synthetase] (EC 2.4.1.129)
Clavibacter michiganensis strain PF008	28447.7	CP012573	fig|28447.7.peg.19	AES38_00100		PATRIC.28447.7.CP012573.CDS.21560.22957.rev	PATRIC	CDS	21560	22957	1398	-	FIG00000025	PLF_1573_00002371	PGF_00417067		465		Cell division protein FtsW
Clavibacter michiganensis strain PF008	28447.7	CP012573	fig|28447.7.peg.20	AES38_00105		PATRIC.28447.7.CP012573.CDS.22950.24212.rev	PATRIC	CDS	22950	24212	1263	-		PLF_1573_00000736	PGF_00051397		420		Serine/threonine phosphatase PPP (EC 3.1.3.16)
Clavibacter michiganensis strain PF008	28447.7	CP012573	fig|28447.7.peg.21	AES38_00110		PATRIC.28447.7.CP012573.CDS.24217.24801.rev	PATRIC	CDS	24217	24801	585	-	FIG00662021	PLF_1573_00001396	PGF_00000547		194		FIG00818182: hypothetical protein
Clavibacter michiganensis strain PF008	28447.7	CP012573	fig|28447.7.peg.22	AES38_00115		PATRIC.28447.7.CP012573.CDS.24798.25028.rev	PATRIC	CDS	24798	25028	231	-	FIG00001294				76		Adenylate cyclase (EC 4.6.1.1)
Clavibacter michiganensis strain PF008	28447.7	CP012573	fig|28447.7.peg.23			PATRIC.28447.7.CP012573.CDS.25029.25535.fwd	PATRIC	CDS	25029	25535	507	+		PLF_1573_00004598	PGF_01252815		168		hypothetical protein
Clavibacter michiganensis strain PF008	28447.7	CP012573	fig|28447.7.peg.24	AES38_00125		PATRIC.28447.7.CP012573.CDS.25856.27916.rev	PATRIC	CDS	25856	27916	2061	-	FIG00638284	PLF_1573_00003524	PGF_01252023		686		O-antigen acetylase
Clavibacter michiganensis strain PF008	28447.7	CP012573	fig|28447.7.peg.25	AES38_00130		PATRIC.28447.7.CP012573.CDS.28089.30377.fwd	PATRIC	CDS	28089	30377	2289	+	FIG00512246	PLF_1573_00001410	PGF_00001333		762		FIG00996524: hypothetical protein
Clavibacter michiganensis strain PF008	28447.7	CP012573	fig|28447.7.peg.26	AES38_00135		PATRIC.28447.7.CP012573.CDS.30374.31063.fwd	PATRIC	CDS	30374	31063	690	+	FIG00511249	PLF_1573_00001926	PGF_00062831		229		Two-component system response regulator
Clavibacter michiganensis strain PF008	28447.7	CP012573	fig|28447.7.peg.27	AES38_00140		PATRIC.28447.7.CP012573.CDS.31071.32255.fwd	PATRIC	CDS	31071	32255	1185	+	FIG00634483	PLF_1573_00001929	PGF_00062944		394		Two-component system sensor kinase
Clavibacter michiganensis strain PF008	28447.7	CP012573	fig|28447.7.peg.28	AES38_00145		PATRIC.28447.7.CP012573.CDS.32299.32421.rev	PATRIC	CDS	32299	32421	123	-	FIG00000229	PLF_1573_00001257	PGF_00016425		40		LSU ribosomal protein L36p @ LSU ribosomal protein L36p, zinc-independent
Clavibacter michiganensis strain PF008	28447.7	CP012573	fig|28447.7.peg.29	AES38_00150		PATRIC.28447.7.CP012573.CDS.32466.33536.fwd	PATRIC	CDS	32466	33536	1071	+	FIG00017190	PLF_1573_00001715	PGF_00042158		356		Putative metal chaperone, involved in Zn homeostasis, GTPase of COG0523 family
Clavibacter michiganensis strain PF008	28447.7	CP012573	fig|28447.7.peg.30	AES38_00155		PATRIC.28447.7.CP012573.CDS.33639.35453.fwd	PATRIC	CDS	33639	35453	1815	+	FIG00000422	PLF_1573_00001392	PGF_00016645		604		ATP-dependent DNA helicase RecQ
Clavibacter michiganensis strain PF008	28447.7	CP012573	fig|28447.7.peg.31	AES38_00160		PATRIC.28447.7.CP012573.CDS.35747.36712.fwd	PATRIC	CDS	35747	36712	966	+	FIG00001174	PLF_1573_00002827	PGF_00008192		321		Glutaminase (EC 3.5.1.2)
Clavibacter michiganensis strain PF008	28447.7	CP012573	fig|28447.7.peg.32	AES38_00165		PATRIC.28447.7.CP012573.CDS.36747.37772.rev	PATRIC	CDS	36747	37772	1026	-	FIG00133285	PLF_1573_00002849	PGF_00402123		341		Beta-ketoadipate enol-lactone hydrolase (EC 3.1.1.24)
Clavibacter michiganensis strain PF008	28447.7	CP012573	fig|28447.7.peg.33	AES38_00170		PATRIC.28447.7.CP012573.CDS.37866.38255.rev	PATRIC	CDS	37866	38255	390	-	FIG00638284	PLF_1573_00000855	PGF_00197360		129		hypothetical protein
Clavibacter michiganensis strain PF008	28447.7	CP012573	fig|28447.7.peg.34	AES38_00175		PATRIC.28447.7.CP012573.CDS.38494.39300.fwd	PATRIC	CDS	38494	39300	807	+	FIG01374069	PLF_1573_00001835	PGF_00054833		268		Sugar phosphate isomerases/epimerases
Clavibacter michiganensis strain PF008	28447.7	CP012573	fig|28447.7.peg.35	AES38_00180		PATRIC.28447.7.CP012573.CDS.39297.40406.fwd	PATRIC	CDS	39297	40406	1110	+	FIG00436364	PLF_1573_00000246	PGF_00422800		369		Dehydrogenase
Clavibacter michiganensis strain PF008	28447.7	CP012573	fig|28447.7.peg.36	AES38_00185		PATRIC.28447.7.CP012573.CDS.40503.41234.fwd	PATRIC	CDS	40503	41234	732	+	FIG00133285	PLF_1573_00002801	PGF_01251653		243		Beta-ketoadipate enol-lactone hydrolase (EC 3.1.1.24)
Clavibacter michiganensis strain PF008	28447.7	CP012573	fig|28447.7.peg.37	AES38_00190		PATRIC.28447.7.CP012573.CDS.41231.41941.fwd	PATRIC	CDS	41231	41941	711	+	FIG00638284	PLF_1573_00000970	PGF_00251055		236		hypothetical protein
Clavibacter michiganensis strain PF008	28447.7	CP012573	fig|28447.7.peg.38	AES38_00195		PATRIC.28447.7.CP012573.CDS.42026.42631.fwd	PATRIC	CDS	42026	42631	606	+	FIG00814168	PLF_1573_00001101	PGF_00423122		201		Dienelactone hydrolase and related enzymes
Clavibacter michiganensis strain PF008	28447.7	CP012573	fig|28447.7.peg.39	AES38_00200		PATRIC.28447.7.CP012573.CDS.42651.44159.rev	PATRIC	CDS	42651	44159	1509	-	FIG01809184	PLF_1573_00001683	PGF_00037040		502		Probable efflux transporter protein
Clavibacter michiganensis strain PF008	28447.7	CP012573	fig|28447.7.peg.40	AES38_00205		PATRIC.28447.7.CP012573.CDS.44243.44986.fwd	PATRIC	CDS	44243	44986	744	+	FIG00554417	PLF_1573_00001866	PGF_00058904		247		Transcriptional regulator, AcrR family
Clavibacter michiganensis strain PF008	28447.7	CP012573	fig|28447.7.peg.41	AES38_00210		PATRIC.28447.7.CP012573.CDS.45059.48457.rev	PATRIC	CDS	45059	48457	3399	-	FIG00018699	PLF_1573_00002345	PGF_00017565		1132		Long-chain-fatty-acid--CoA ligase (EC 6.2.1.3)
Clavibacter michiganensis strain PF008	28447.7	CP012573	fig|28447.7.peg.42	AES38_00215		PATRIC.28447.7.CP012573.CDS.48505.49182.rev	PATRIC	CDS	48505	49182	678	-	FIG01423079	PLF_1573_00002296	PGF_00422449		225		4'-phosphopantetheinyl transferase entD (EC 2.7.8.-)
Clavibacter michiganensis strain PF008	28447.7	CP012573	fig|28447.7.peg.43	AES38_00220		PATRIC.28447.7.CP012573.CDS.49408.50175.fwd	PATRIC	CDS	49408	50175	768	+	FIG00621114	PLF_1573_00003523	PGF_00420719		255		3-oxoacyl-[acyl-carrier protein] reductase (EC 1.1.1.100)
Clavibacter michiganensis strain PF008	28447.7	CP012573	fig|28447.7.peg.44			PATRIC.28447.7.CP012573.CDS.50222.50989.rev	PATRIC	CDS	50222	50989	768	-	FIG01712793	PLF_1573_00002571	PGF_01251536		255		possible anti-sigma factor
Clavibacter michiganensis strain PF008	28447.7	CP012573	fig|28447.7.peg.45	AES38_00230		PATRIC.28447.7.CP012573.CDS.50986.51489.rev	PATRIC	CDS	50986	51489	504	-	FIG00952839	PLF_1573_00002490	PGF_00046477		167		RNA polymerase sigma-70 factor, ECF subfamily
Clavibacter michiganensis strain PF008	28447.7	CP012573	fig|28447.7.peg.46	AES38_00235		PATRIC.28447.7.CP012573.CDS.51743.52453.fwd	PATRIC	CDS	51743	52453	711	+	FIG00638284	PLF_1573_00002570	PGF_00258221		236		hypothetical protein
Clavibacter michiganensis strain PF008	28447.7	CP012573	fig|28447.7.peg.47	AES38_00240		PATRIC.28447.7.CP012573.CDS.52459.53115.fwd	PATRIC	CDS	52459	53115	657	+	FIG00905474	PLF_1573_00002719	PGF_00410584		218		putative secreted protein
Clavibacter michiganensis strain PF008	28447.7	CP012573	fig|28447.7.peg.48	AES38_00245		PATRIC.28447.7.CP012573.CDS.53146.53412.rev	PATRIC	CDS	53146	53412	267	-		PLF_1573_00001076	PGF_01251275		88		hypothetical protein
Clavibacter michiganensis strain PF008	28447.7	CP012573	fig|28447.7.peg.49	AES38_00250		PATRIC.28447.7.CP012573.CDS.53415.53678.rev	PATRIC	CDS	53415	53678	264	-		PLF_1573_00001076	PGF_01251275		87		hypothetical protein
Clavibacter michiganensis strain PF008	28447.7	CP012573	fig|28447.7.peg.50	AES38_00255		PATRIC.28447.7.CP012573.CDS.53796.55061.rev	PATRIC	CDS	53796	55061	1266	-	FIG00638284	PLF_1573_00002507	PGF_01251524		421		Streptococcal hemagglutinin protein
Clavibacter michiganensis strain PF008	28447.7	CP012573	fig|28447.7.peg.51	AES38_00260		PATRIC.28447.7.CP012573.CDS.55207.55848.fwd	PATRIC	CDS	55207	55848	642	+	FIG00008873	PLF_1573_00001741	PGF_00045943		213		Pyrrolidone-carboxylate peptidase (EC 3.4.19.3)
Clavibacter michiganensis strain PF008	28447.7	CP012573	fig|28447.7.peg.52			PATRIC.28447.7.CP012573.CDS.55898.56893.rev	PATRIC	CDS	55898	56893	996	-	FIG00638284				331		hypothetical protein
Clavibacter michiganensis strain PF008	28447.7	CP012573	fig|28447.7.peg.53	AES38_00265		PATRIC.28447.7.CP012573.CDS.56964.58400.rev	PATRIC	CDS	56964	58400	1437	-	FIG01322378	PLF_1573_00001641	PGF_00031302		478		Permease of the major facilitator superfamily
Clavibacter michiganensis strain PF008	28447.7	CP012573	fig|28447.7.peg.54	AES38_00270		PATRIC.28447.7.CP012573.CDS.58499.59224.fwd	PATRIC	CDS	58499	59224	726	+	FIG00638284	PLF_1573_00002002	PGF_00192813		241		hypothetical protein
Clavibacter michiganensis strain PF008	28447.7	CP012573	fig|28447.7.peg.55	AES38_00275		PATRIC.28447.7.CP012573.CDS.59229.59630.rev	PATRIC	CDS	59229	59630	402	-		PLF_1573_00002744	PGF_01251628		133		Mutator MutT protein
Clavibacter michiganensis strain PF008	28447.7	CP012573	fig|28447.7.peg.56	AES38_00280		PATRIC.28447.7.CP012573.CDS.59627.60112.rev	PATRIC	CDS	59627	60112	486	-	FIG00554610	PLF_1573_00002527	PGF_00059526		161		Transcriptional regulator, MarR family
Clavibacter michiganensis strain PF008	28447.7	CP012573	fig|28447.7.peg.57	AES38_00285		PATRIC.28447.7.CP012573.CDS.60340.61008.fwd	PATRIC	CDS	60340	61008	669	+	FIG00658333	PLF_1573_00001415	PGF_00008909		222		Glycoprotein gp2
Clavibacter michiganensis strain PF008	28447.7	CP012573	fig|28447.7.peg.58	AES38_00290		PATRIC.28447.7.CP012573.CDS.61089.62084.fwd	PATRIC	CDS	61089	62084	996	+	FIG00000015	PLF_1573_00001813	PGF_01251333		331		Signal peptidase I (EC 3.4.21.89)
Clavibacter michiganensis strain PF008	28447.7	CP012573	fig|28447.7.peg.59	AES38_00295		PATRIC.28447.7.CP012573.CDS.62081.62980.fwd	PATRIC	CDS	62081	62980	900	+	FIG00001347	PLF_1573_00002376	PGF_01251510		299		Chitinase (EC 3.2.1.14)
Clavibacter michiganensis strain PF008	28447.7	CP012573	fig|28447.7.peg.60	AES38_00300		PATRIC.28447.7.CP012573.CDS.63035.64006.rev	PATRIC	CDS	63035	64006	972	-	FIG00511200	PLF_1573_00000074	PGF_00369140		323		FIG00511202: hypothetical protein
Clavibacter michiganensis strain PF008	28447.7	CP012573	fig|28447.7.peg.61	AES38_00305		PATRIC.28447.7.CP012573.CDS.64337.65029.rev	PATRIC	CDS	64337	65029	693	-	FIG00638284	PLF_1573_00000038	PGF_01252163		230		FIG00997543: hypothetical protein
Clavibacter michiganensis strain PF008	28447.7	CP012573	fig|28447.7.peg.62	AES38_00310		PATRIC.28447.7.CP012573.CDS.65158.65802.rev	PATRIC	CDS	65158	65802	645	-	FIG00512106	PLF_1573_00001001	PGF_01251251		214		FIG00512108: hypothetical protein
Clavibacter michiganensis strain PF008	28447.7	CP012573	fig|28447.7.peg.63	AES38_00315		PATRIC.28447.7.CP012573.CDS.65802.66404.rev	PATRIC	CDS	65802	66404	603	-	FIG00000015	PLF_1573_00001812	PGF_01251332		200		Signal peptidase I (EC 3.4.21.89)
Clavibacter michiganensis strain PF008	28447.7	CP012573	fig|28447.7.peg.64	AES38_00320		PATRIC.28447.7.CP012573.CDS.66401.67174.rev	PATRIC	CDS	66401	67174	774	-	FIG00511381	PLF_1573_00001302	PGF_01251295		257		Fibroin heavy chain precursor (Fib-H) (H-fibroin)
Clavibacter michiganensis strain PF008	28447.7	CP012573	fig|28447.7.peg.65	AES38_00325		PATRIC.28447.7.CP012573.CDS.67287.67985.rev	PATRIC	CDS	67287	67985	699	-		PLF_1573_00000998	PGF_01253427		232		hypothetical protein
Clavibacter michiganensis strain PF008	28447.7	CP012573	fig|28447.7.peg.66	AES38_00330		PATRIC.28447.7.CP012573.CDS.68135.71542.rev	PATRIC	CDS	68135	71542	3408	-	FIG01955942	PLF_1573_00003130	PGF_00251055		1135		internalin, putative
Clavibacter michiganensis strain PF008	28447.7	CP012573	fig|28447.7.peg.67	AES38_00335		PATRIC.28447.7.CP012573.CDS.71947.73818.fwd	PATRIC	CDS	71947	73818	1872	+	FIG00023369	PLF_1573_00001487	PGF_00417433		623	dnaK	Chaperone protein DnaK
Clavibacter michiganensis strain PF008	28447.7	CP012573	fig|28447.7.peg.68	AES38_00340		PATRIC.28447.7.CP012573.CDS.73815.74468.fwd	PATRIC	CDS	73815	74468	654	+	FIG00000103	PLF_1573_00001371	PGF_00010972		217		Heat shock protein GrpE
Clavibacter michiganensis strain PF008	28447.7	CP012573	fig|28447.7.peg.69	AES38_00345		PATRIC.28447.7.CP012573.CDS.74589.75599.fwd	PATRIC	CDS	74589	75599	1011	+	FIG00000070	PLF_1573_00001370	PGF_00417428		336		Chaperone protein DnaJ
Clavibacter michiganensis strain PF008	28447.7	CP012573	fig|28447.7.peg.70	AES38_00350		PATRIC.28447.7.CP012573.CDS.75601.76074.fwd	PATRIC	CDS	75601	76074	474	+	FIG00002442	PLF_1573_00001428	PGF_00012430		157		HspR, transcriptional repressor of DnaK operon
Clavibacter michiganensis strain PF008	28447.7	CP012573	fig|28447.7.peg.71	AES38_00355		PATRIC.28447.7.CP012573.CDS.76071.77273.fwd	PATRIC	CDS	76071	77273	1203	+	FIG00003026	PLF_1573_00001494	PGF_00415363		400		23S rRNA (guanine(1835)-N(2))-methyltransferase (EC 2.1.1.174)
Clavibacter michiganensis strain PF008	28447.7	CP012573	fig|28447.7.peg.72	AES38_00360		PATRIC.28447.7.CP012573.CDS.77326.77766.fwd	PATRIC	CDS	77326	77766	441	+	FIG00511582	PLF_1573_00002065	PGF_01251396		146		FIG00511586: hypothetical protein
Clavibacter michiganensis strain PF008	28447.7	CP012573	fig|28447.7.peg.73	AES38_00365		PATRIC.28447.7.CP012573.CDS.77790.78026.rev	PATRIC	CDS	77790	78026	237	-	FIG01232116	PLF_1573_00000065	PGF_00059085		78		Transcriptional regulator, Cro/CI family
Clavibacter michiganensis strain PF008	28447.7	CP012573	fig|28447.7.peg.74	AES38_00370		PATRIC.28447.7.CP012573.CDS.78026.78664.rev	PATRIC	CDS	78026	78664	639	-	FIG00511491	PLF_1573_00000914	PGF_01253372		212		FIG00511493: hypothetical protein
Clavibacter michiganensis strain PF008	28447.7	CP012573	fig|28447.7.peg.75	AES38_00375		PATRIC.28447.7.CP012573.CDS.78746.79165.rev	PATRIC	CDS	78746	79165	420	-	FIG00512243	PLF_1573_00002066	PGF_01251397		139		FIG00512246: hypothetical protein
Clavibacter michiganensis strain PF008	28447.7	CP012573	fig|28447.7.peg.76	AES38_00380		PATRIC.28447.7.CP012573.CDS.79664.81184.rev	PATRIC	CDS	79664	81184	1521	-	FIG00005216	PLF_1573_00000063	PGF_00054973		506		Sulfate permease
Clavibacter michiganensis strain PF008	28447.7	CP012573	fig|28447.7.peg.77	AES38_00385		PATRIC.28447.7.CP012573.CDS.81373.82107.rev	PATRIC	CDS	81373	82107	735	-		PLF_1573_00002202	PGF_00406500		244		putative carboxylesterase
Clavibacter michiganensis strain PF008	28447.7	CP012573	fig|28447.7.peg.78	AES38_00390		PATRIC.28447.7.CP012573.CDS.82270.83298.rev	PATRIC	CDS	82270	83298	1029	-	FIG00638284	PLF_1573_00001883	PGF_00059365		342		Transcriptional regulator, LacI family
Clavibacter michiganensis strain PF008	28447.7	CP012573	fig|28447.7.peg.79	AES38_00395		PATRIC.28447.7.CP012573.CDS.83417.84691.rev	PATRIC	CDS	83417	84691	1275	-	FIG00638284	PLF_1573_00003045	PGF_01251732		424		hypothetical protein
Clavibacter michiganensis strain PF008	28447.7	CP012573	fig|28447.7.peg.80	AES38_00400		PATRIC.28447.7.CP012573.CDS.84719.85063.fwd	PATRIC	CDS	84719	85063	345	+		PLF_1573_00004192	PGF_01252471		114		hypothetical protein
Clavibacter michiganensis strain PF008	28447.7	CP012573	fig|28447.7.peg.81	AES38_00405		PATRIC.28447.7.CP012573.CDS.85060.86100.fwd	PATRIC	CDS	85060	86100	1041	+	FIG00511539	PLF_1573_00000086	PGF_00315871		346		FIG00511541: hypothetical protein
Clavibacter michiganensis strain PF008	28447.7	CP012573	fig|28447.7.peg.82	AES38_00410		PATRIC.28447.7.CP012573.CDS.86395.87135.fwd	PATRIC	CDS	86395	87135	741	+	FIG00016132	PLF_1573_00002152	PGF_01251447		246		putative esterase
Clavibacter michiganensis strain PF008	28447.7	CP012573	fig|28447.7.peg.83	AES38_00415		PATRIC.28447.7.CP012573.CDS.87217.88125.fwd	PATRIC	CDS	87217	88125	909	+	FIG00044059	PLF_1573_00000313	PGF_01251793		302	fecE	Ferrichrome transport ATP-binding protein FhuC (TC 3.A.1.14.3)
Clavibacter michiganensis strain PF008	28447.7	CP012573	fig|28447.7.peg.84	AES38_00420		PATRIC.28447.7.CP012573.CDS.88143.89111.fwd	PATRIC	CDS	88143	89111	969	+	FIG00133356	PLF_1573_00001298	PGF_00004599		322		Ferrichrome-binding periplasmic protein precursor (TC 3.A.1.14.3)
Clavibacter michiganensis strain PF008	28447.7	CP012573	fig|28447.7.peg.85	AES38_00425		PATRIC.28447.7.CP012573.CDS.89143.91299.fwd	PATRIC	CDS	89143	91299	2157	+	FIG00003243	PLF_1573_00000314	PGF_01251803		718		Ferrichrome transport system permease protein FhuB (TC 3.A.1.14.3)
Clavibacter michiganensis strain PF008	28447.7	CP012573	fig|28447.7.peg.86	AES38_00430		PATRIC.28447.7.CP012573.CDS.91330.91713.fwd	PATRIC	CDS	91330	91713	384	+	FIG00511710	PLF_1573_00001288	PGF_00019290		127		Mannose-6-phosphate isomerase
Clavibacter michiganensis strain PF008	28447.7	CP012573	fig|28447.7.peg.87	AES38_00435		PATRIC.28447.7.CP012573.CDS.91733.92242.rev	PATRIC	CDS	91733	92242	510	-	FIG01272034	PLF_1573_00000545	PGF_00024105		169		N-acetyltransferase, GCN5-family
Clavibacter michiganensis strain PF008	28447.7	CP012573	fig|28447.7.peg.88	AES38_00440		PATRIC.28447.7.CP012573.CDS.92405.92698.fwd	PATRIC	CDS	92405	92698	294	+		PLF_1573_00003262	PGF_01251882		97		hypothetical protein
Clavibacter michiganensis strain PF008	28447.7	CP012573	fig|28447.7.peg.89	AES38_00445		PATRIC.28447.7.CP012573.CDS.92931.93437.fwd	PATRIC	CDS	92931	93437	507	+		PLF_1573_00004360	PGF_00351928		168		hypothetical protein
Clavibacter michiganensis strain PF008	28447.7	CP012573	fig|28447.7.peg.90			PATRIC.28447.7.CP012573.CDS.93636.94562.fwd	PATRIC	CDS	93636	94562	927	+	FIG00638284		PGF_01726221		308		hypothetical protein
Clavibacter michiganensis strain PF008	28447.7	CP012573	fig|28447.7.peg.91	AES38_00455		PATRIC.28447.7.CP012573.CDS.94602.95117.rev	PATRIC	CDS	94602	95117	516	-	FIG01272034	PLF_1573_00002940	PGF_00059570		171		Transcriptional regulator, MarR family
Clavibacter michiganensis strain PF008	28447.7	CP012573	fig|28447.7.peg.92	AES38_00460		PATRIC.28447.7.CP012573.CDS.95187.96080.fwd	PATRIC	CDS	95187	96080	894	+	FIG00006483	PLF_1573_00003732	PGF_00017872		297		LysR family transcriptional regulator YnfL
Clavibacter michiganensis strain PF008	28447.7	CP012573	fig|28447.7.peg.93	AES38_00465		PATRIC.28447.7.CP012573.CDS.96145.97524.fwd	PATRIC	CDS	96145	97524	1380	+	FIG01959002	PLF_1573_00001829	PGF_00054496		459		Succinate-semialdehyde dehydrogenase [NAD] (EC 1.2.1.24); Succinate-semialdehyde dehydrogenase [NADP+] (EC 1.2.1.79)
Clavibacter michiganensis strain PF008	28447.7	CP012573	fig|28447.7.peg.94	AES38_00470		PATRIC.28447.7.CP012573.CDS.97550.97732.rev	PATRIC	CDS	97550	97732	183	-					60		hypothetical protein
Clavibacter michiganensis strain PF008	28447.7	CP012573	fig|28447.7.peg.95	AES38_00475		PATRIC.28447.7.CP012573.CDS.97864.98607.rev	PATRIC	CDS	97864	98607	744	-	FIG00554417	PLF_1573_00001862	PGF_00058904		247		Transcriptional regulator, AcrR family
Clavibacter michiganensis strain PF008	28447.7	CP012573	fig|28447.7.peg.96	AES38_00480		PATRIC.28447.7.CP012573.CDS.98670.100211.fwd	PATRIC	CDS	98670	100211	1542	+	FIG00511783	PLF_1573_00001640	PGF_00031288		513		Permease of the major facilitator superfamily
Clavibacter michiganensis strain PF008	28447.7	CP012573	fig|28447.7.peg.97	AES38_00485		PATRIC.28447.7.CP012573.CDS.100247.100996.rev	PATRIC	CDS	100247	100996	750	-	FIG01580996	PLF_1573_00000773	PGF_01253317		249		Transcriptional regulator, AcrR family
Clavibacter michiganensis strain PF008	28447.7	CP012573	fig|28447.7.peg.98	AES38_00490		PATRIC.28447.7.CP012573.CDS.101081.102196.fwd	PATRIC	CDS	101081	102196	1116	+	FIG01583289	PLF_1573_00002866	PGF_00023541		371		Myo-inositol 2-dehydrogenase (EC 1.1.1.18)
Clavibacter michiganensis strain PF008	28447.7	CP012573	fig|28447.7.peg.99	AES38_00495		PATRIC.28447.7.CP012573.CDS.102193.103005.fwd	PATRIC	CDS	102193	103005	813	+	FIG00512035	PLF_1573_00000068	PGF_01253304		270		FIG00512036: hypothetical protein
Clavibacter michiganensis strain PF008	28447.7	CP012573	fig|28447.7.peg.100	AES38_00500		PATRIC.28447.7.CP012573.CDS.103065.104387.fwd	PATRIC	CDS	103065	104387	1323	+	FIG00013626	PLF_1573_00001568	PGF_00023671		440		N-Acetyl-D-glucosamine ABC transport system, sugar-binding protein
Clavibacter michiganensis strain PF008	28447.7	CP012573	fig|28447.7.peg.101	AES38_00505		PATRIC.28447.7.CP012573.CDS.104431.105417.fwd	PATRIC	CDS	104431	105417	987	+	FIG00019868	PLF_1573_00001282	PGF_00019121		328		Maltose/maltodextrin ABC transporter, permease protein MalF
Clavibacter michiganensis strain PF008	28447.7	CP012573	fig|28447.7.peg.102	AES38_00510		PATRIC.28447.7.CP012573.CDS.105414.106295.fwd	PATRIC	CDS	105414	106295	882	+	FIG00511473	PLF_1573_00000465	PGF_00004903		293		ABC transporter, permease protein
Clavibacter michiganensis strain PF008	28447.7	CP012573	fig|28447.7.peg.103	AES38_00515		PATRIC.28447.7.CP012573.CDS.106397.108229.rev	PATRIC	CDS	106397	108229	1833	-	FIG00001548	PLF_1573_00000482	PGF_00401635		610		Beta-galactosidase (EC 3.2.1.23)
Clavibacter michiganensis strain PF008	28447.7	CP012573	fig|28447.7.peg.104			PATRIC.28447.7.CP012573.CDS.108305.109126.rev	PATRIC	CDS	108305	109126	822	-	FIG00739191	PLF_1573_00000805	PGF_00061803		273		Trehalose utilization protein
Clavibacter michiganensis strain PF008	28447.7	CP012573	fig|28447.7.peg.105	AES38_00525		PATRIC.28447.7.CP012573.CDS.109123.110307.rev	PATRIC	CDS	109123	110307	1185	-	FIG01583289	PLF_1573_00001565	PGF_00023541		394		Myo-inositol 2-dehydrogenase (EC 1.1.1.18)
Clavibacter michiganensis strain PF008	28447.7	CP012573	fig|28447.7.peg.106	AES38_00530		PATRIC.28447.7.CP012573.CDS.110304.111185.rev	PATRIC	CDS	110304	111185	882	-	FIG00638284		PGF_00370310		293		hypothetical protein
Clavibacter michiganensis strain PF008	28447.7	CP012573	fig|28447.7.peg.107	AES38_00535		PATRIC.28447.7.CP012573.CDS.111187.112131.rev	PATRIC	CDS	111187	112131	945	-	FIG00638284	PLF_1573_00003607	PGF_00351615		314		hypothetical protein
Clavibacter michiganensis strain PF008	28447.7	CP012573	fig|28447.7.peg.108	AES38_00540		PATRIC.28447.7.CP012573.CDS.112128.113471.rev	PATRIC	CDS	112128	113471	1344	-		PLF_1573_00003608	PGF_01252068		447		hypothetical protein
Clavibacter michiganensis strain PF008	28447.7	CP012573	fig|28447.7.peg.109			PATRIC.28447.7.CP012573.CDS.113567.113983.rev	PATRIC	CDS	113567	113983	417	-	FIG00638284				138		hypothetical protein
Clavibacter michiganensis strain PF008	28447.7	CP012573	fig|28447.7.peg.110			PATRIC.28447.7.CP012573.CDS.114065.114910.rev	PATRIC	CDS	114065	114910	846	-			PGF_00334351		281		hypothetical protein
Clavibacter michiganensis strain PF008	28447.7	CP012573	fig|28447.7.peg.111	AES38_00550		PATRIC.28447.7.CP012573.CDS.114957.117581.rev	PATRIC	CDS	114957	117581	2625	-	FIG00511311	PLF_1573_00001455	PGF_00014647		874		Integral membrane protein
Clavibacter michiganensis strain PF008	28447.7	CP012573	fig|28447.7.peg.112	AES38_00555		PATRIC.28447.7.CP012573.CDS.117643.118248.fwd	PATRIC	CDS	117643	118248	606	+	FIG00628138	PLF_1573_00000780	PGF_00058904		201		Transcriptional regulator, AcrR family
Clavibacter michiganensis strain PF008	28447.7	CP012573	fig|28447.7.peg.113	AES38_00560		PATRIC.28447.7.CP012573.CDS.118249.119208.rev	PATRIC	CDS	118249	119208	960	-	FIG00031250	PLF_1573_00002838	PGF_00420768		319		D-3-phosphoglycerate dehydrogenase (EC 1.1.1.95)
Clavibacter michiganensis strain PF008	28447.7	CP012573	fig|28447.7.peg.114	AES38_00565		PATRIC.28447.7.CP012573.CDS.119259.120542.rev	PATRIC	CDS	119259	120542	1284	-	FIG00997055	PLF_1573_00004354	PGF_00282779		427		possible dicarboxylate carrier protein
Clavibacter michiganensis strain PF008	28447.7	CP012573	fig|28447.7.peg.115			PATRIC.28447.7.CP012573.CDS.120610.121776.fwd	PATRIC	CDS	120610	121776	1167	+					388		hypothetical protein
Clavibacter michiganensis strain PF008	28447.7	CP012573	fig|28447.7.peg.116	AES38_00575		PATRIC.28447.7.CP012573.CDS.121786.122718.fwd	PATRIC	CDS	121786	122718	933	+		PLF_1573_00003610	PGF_01252069		310		Chromosome initiation inhibitor
Clavibacter michiganensis strain PF008	28447.7	CP012573	fig|28447.7.peg.117	AES38_00580		PATRIC.28447.7.CP012573.CDS.123058.123990.fwd	PATRIC	CDS	123058	123990	933	+	FIG00638284				310		hypothetical protein
Clavibacter michiganensis strain PF008	28447.7	CP012573	fig|28447.7.peg.118	AES38_00585		PATRIC.28447.7.CP012573.CDS.124120.124758.rev	PATRIC	CDS	124120	124758	639	-		PLF_1573_00002739	PGF_00283692		212		Lysine exporter protein (LYSE/YGGA)
Clavibacter michiganensis strain PF008	28447.7	CP012573	fig|28447.7.peg.119	AES38_00590		PATRIC.28447.7.CP012573.CDS.124912.125769.rev	PATRIC	CDS	124912	125769	858	-	FIG00000819	PLF_1573_00001111	PGF_00418720		285		3-hydroxybutyryl-CoA dehydrogenase (EC 1.1.1.157); 3-hydroxyacyl-CoA dehydrogenase (EC 1.1.1.35)
Clavibacter michiganensis strain PF008	28447.7	CP012573	fig|28447.7.peg.120	AES38_00595		PATRIC.28447.7.CP012573.CDS.125928.127499.rev	PATRIC	CDS	125928	127499	1572	-	FIG00638284	PLF_1573_00003689	PGF_00070873		523		BRAMP
Clavibacter michiganensis strain PF008	28447.7	CP012573	fig|28447.7.peg.121	AES38_00605		PATRIC.28447.7.CP012573.CDS.128015.129031.fwd	PATRIC	CDS	128015	129031	1017	+	FIG00638284		PGF_00241631		338		hypothetical protein
Clavibacter michiganensis strain PF008	28447.7	CP012573	fig|28447.7.peg.122	AES38_00610		PATRIC.28447.7.CP012573.CDS.129195.129617.fwd	PATRIC	CDS	129195	129617	423	+	FIG00000915	PLF_1573_00000420	PGF_00013272		140		Hypothetical protein YaeJ with similarity to translation release factor
Clavibacter michiganensis strain PF008	28447.7	CP012573	fig|28447.7.peg.123	AES38_00615		PATRIC.28447.7.CP012573.CDS.129645.130694.rev	PATRIC	CDS	129645	130694	1050	-	FIG00455028	PLF_1573_00000444	PGF_00040704		349		Alkanal monooxygenase alpha chain (EC 1.14.14.3)
Clavibacter michiganensis strain PF008	28447.7	CP012573	fig|28447.7.peg.124	AES38_00620		PATRIC.28447.7.CP012573.CDS.130745.131173.fwd	PATRIC	CDS	130745	131173	429	+	FIG00638284	PLF_1573_00002635	PGF_00291910		142		hypothetical protein
Clavibacter michiganensis strain PF008	28447.7	CP012573	fig|28447.7.peg.125	AES38_00625		PATRIC.28447.7.CP012573.CDS.131170.131397.rev	PATRIC	CDS	131170	131397	228	-		PLF_1573_00000853	PGF_01253334		75		hypothetical protein
Clavibacter michiganensis strain PF008	28447.7	CP012573	fig|28447.7.peg.126	AES38_00630		PATRIC.28447.7.CP012573.CDS.131397.131969.rev	PATRIC	CDS	131397	131969	573	-	FIG00554417	PLF_1573_00001863	PGF_00058904		190		Transcriptional regulator, AcrR family
Clavibacter michiganensis strain PF008	28447.7	CP012573	fig|28447.7.peg.127	AES38_00635		PATRIC.28447.7.CP012573.CDS.132066.133181.fwd	PATRIC	CDS	132066	133181	1116	+		PLF_1573_00001337	PGF_00403208		371		Bifunctional protein: zinc-containing alcohol dehydrogenase; quinone oxidoreductase ( NADPH:quinone reductase) (EC 1.1.1.-); Similar to arginate lyase
Clavibacter michiganensis strain PF008	28447.7	CP012573	fig|28447.7.peg.128			PATRIC.28447.7.CP012573.CDS.133463.133978.rev	PATRIC	CDS	133463	133978	516	-	FIG00638284	PLF_1573_00002653	PGF_01251579		171		hypothetical protein
Clavibacter michiganensis strain PF008	28447.7	CP012573	fig|28447.7.peg.129	AES38_00645		PATRIC.28447.7.CP012573.CDS.133975.134628.rev	PATRIC	CDS	133975	134628	654	-	FIG00638284				217		hypothetical protein
Clavibacter michiganensis strain PF008	28447.7	CP012573	fig|28447.7.peg.130	AES38_00650		PATRIC.28447.7.CP012573.CDS.134715.135293.fwd	PATRIC	CDS	134715	135293	579	+	FIG01461712	PLF_1573_00002229	PGF_00409990		192		putative periplasmic membrane protein
Clavibacter michiganensis strain PF008	28447.7	CP012573	fig|28447.7.peg.131	AES38_00655		PATRIC.28447.7.CP012573.CDS.135578.136927.fwd	PATRIC	CDS	135578	136927	1350	+		PLF_1573_00003612	PGF_00019167		449		Maltose/maltodextrin ABC transporter, substrate binding periplasmic protein MalE
Clavibacter michiganensis strain PF008	28447.7	CP012573	fig|28447.7.peg.132	AES38_00660		PATRIC.28447.7.CP012573.CDS.136974.137837.fwd	PATRIC	CDS	136974	137837	864	+	FIG00019868	PLF_1573_00003613	PGF_01252071		287		Maltose/maltodextrin ABC transporter, permease protein MalF
Clavibacter michiganensis strain PF008	28447.7	CP012573	fig|28447.7.peg.133	AES38_00665		PATRIC.28447.7.CP012573.CDS.137834.138760.fwd	PATRIC	CDS	137834	138760	927	+	FIG00007714	PLF_1573_00003614	PGF_00019144		308		Maltose/maltodextrin ABC transporter, permease protein MalG
Clavibacter michiganensis strain PF008	28447.7	CP012573	fig|28447.7.peg.134	AES38_00670		PATRIC.28447.7.CP012573.CDS.138768.139889.rev	PATRIC	CDS	138768	139889	1122	-	FIG00638284				373		hypothetical protein
Clavibacter michiganensis strain PF008	28447.7	CP012573	fig|28447.7.peg.135	AES38_00680		PATRIC.28447.7.CP012573.CDS.140003.140632.rev	PATRIC	CDS	140003	140632	630	-	FIG00638284		PGF_01405232		209		hypothetical protein
Clavibacter michiganensis strain PF008	28447.7	CP012573	fig|28447.7.peg.136			PATRIC.28447.7.CP012573.CDS.140738.142219.rev	PATRIC	CDS	140738	142219	1482	-	FIG00638284				493		hypothetical protein
Clavibacter michiganensis strain PF008	28447.7	CP012573	fig|28447.7.peg.137	AES38_00690		PATRIC.28447.7.CP012573.CDS.142288.143010.fwd	PATRIC	CDS	142288	143010	723	+	FIG01709650		PGF_00050261		240		Amidases related to nicotinamidase
Clavibacter michiganensis strain PF008	28447.7	CP012573	fig|28447.7.peg.138	AES38_00695		PATRIC.28447.7.CP012573.CDS.143007.143666.rev	PATRIC	CDS	143007	143666	660	-	FIG00002336	PLF_1573_00000681	PGF_00043222		219		Putative phosphatase YfbT
Clavibacter michiganensis strain PF008	28447.7	CP012573	fig|28447.7.peg.139	AES38_00700		PATRIC.28447.7.CP012573.CDS.143762.144004.fwd	PATRIC	CDS	143762	144004	243	+		PLF_1573_00004663	PGF_01252876		80		hypothetical protein
Clavibacter michiganensis strain PF008	28447.7	CP012573	fig|28447.7.peg.140	AES38_00705		PATRIC.28447.7.CP012573.CDS.143997.144191.fwd	PATRIC	CDS	143997	144191	195	+					64		hypothetical protein
Clavibacter michiganensis strain PF008	28447.7	CP012573	fig|28447.7.peg.141	AES38_00710		PATRIC.28447.7.CP012573.CDS.144207.145166.rev	PATRIC	CDS	144207	145166	960	-	FIG00638284				319		hypothetical protein
Clavibacter michiganensis strain PF008	28447.7	CP012573	fig|28447.7.peg.142	AES38_00715		PATRIC.28447.7.CP012573.CDS.145279.146421.fwd	PATRIC	CDS	145279	146421	1143	+	FIG00511359	PLF_1573_00001732	PGF_00043836		380		Putative sarcosine oxidase (EC 1.5.3.1)
Clavibacter michiganensis strain PF008	28447.7	CP012573	fig|28447.7.peg.143	AES38_00720		PATRIC.28447.7.CP012573.CDS.146471.147148.rev	PATRIC	CDS	146471	147148	678	-	FIG00512316	PLF_1573_00000854	PGF_01253335		225		FIG00512324: hypothetical protein
Clavibacter michiganensis strain PF008	28447.7	CP012573	fig|28447.7.peg.144	AES38_00725		PATRIC.28447.7.CP012573.CDS.147259.148218.rev	PATRIC	CDS	147259	148218	960	-	FIG01506825	PLF_1573_00000470	PGF_00025508		319		Acetyl xylan esterase
Clavibacter michiganensis strain PF008	28447.7	CP012573	fig|28447.7.peg.145	AES38_00730		PATRIC.28447.7.CP012573.CDS.148329.148988.rev	PATRIC	CDS	148329	148988	660	-	FIG00554417	PLF_1573_00000774	PGF_00058904		219		Transcriptional regulator, AcrR family
Clavibacter michiganensis strain PF008	28447.7	CP012573	fig|28447.7.peg.146	AES38_00735		PATRIC.28447.7.CP012573.CDS.148985.151027.rev	PATRIC	CDS	148985	151027	2043	-	FIG01121063	PLF_1573_00000526	PGF_00021636		680		Mll5128 protein
Clavibacter michiganensis strain PF008	28447.7	CP012573	fig|28447.7.peg.147	AES38_00740		PATRIC.28447.7.CP012573.CDS.151024.152757.rev	PATRIC	CDS	151024	152757	1734	-	FIG00014907	PLF_1573_00000166	PGF_00423514		577		Dipeptide transport ATP-binding protein DppD (TC 3.A.1.5.2)
Clavibacter michiganensis strain PF008	28447.7	CP012573	fig|28447.7.peg.148	AES38_00745		PATRIC.28447.7.CP012573.CDS.152757.153650.rev	PATRIC	CDS	152757	153650	894	-	FIG00455853	PLF_1573_00000572	PGF_00027047		297		Oligopeptide transport system permease protein OppC (TC 3.A.1.5.1)
Clavibacter michiganensis strain PF008	28447.7	CP012573	fig|28447.7.peg.149	AES38_00750		PATRIC.28447.7.CP012573.CDS.153647.154663.rev	PATRIC	CDS	153647	154663	1017	-	FIG00511111	PLF_1573_00000204	PGF_00004825		338		ABC transporter, permease protein
Clavibacter michiganensis strain PF008	28447.7	CP012573	fig|28447.7.peg.150	AES38_00755		PATRIC.28447.7.CP012573.CDS.154660.156306.rev	PATRIC	CDS	154660	156306	1647	-	FIG01130506	PLF_1573_00000594	PGF_00030610		548		Peptide ABC transporter, periplasmic peptide-binding protein
Clavibacter michiganensis strain PF008	28447.7	CP012573	fig|28447.7.peg.151	AES38_00760		PATRIC.28447.7.CP012573.CDS.156429.156896.rev	PATRIC	CDS	156429	156896	468	-	FIG00017106	PLF_1573_00002880	PGF_00033154		155		PhnB protein; putative DNA binding 3-demethylubiquinone-9 3-methyltransferase domain protein
Clavibacter michiganensis strain PF008	28447.7	CP012573	fig|28447.7.peg.152			PATRIC.28447.7.CP012573.CDS.157003.157449.fwd	PATRIC	CDS	157003	157449	447	+	FIG00743946	PLF_1573_00002930	PGF_00059195		148		Transcriptional regulator, DeoR family
Clavibacter michiganensis strain PF008	28447.7	CP012573	fig|28447.7.peg.153			PATRIC.28447.7.CP012573.CDS.157434.157982.fwd	PATRIC	CDS	157434	157982	549	+	FIG00743946	PLF_1573_00002930	PGF_00059195		182		Transcriptional regulator, DeoR family
Clavibacter michiganensis strain PF008	28447.7	CP012573	fig|28447.7.peg.154	AES38_00770		PATRIC.28447.7.CP012573.CDS.157998.159986.rev	PATRIC	CDS	157998	159986	1989	-	FIG00638284	PLF_1573_00001038	PGF_00409182		662		putative membrane protein
Clavibacter michiganensis strain PF008	28447.7	CP012573	fig|28447.7.peg.155			PATRIC.28447.7.CP012573.CDS.160275.160715.fwd	PATRIC	CDS	160275	160715	441	+					146		hypothetical protein
Clavibacter michiganensis strain PF008	28447.7	CP012573	fig|28447.7.peg.156	AES38_00780		PATRIC.28447.7.CP012573.CDS.160777.161607.fwd	PATRIC	CDS	160777	161607	831	+		PLF_1573_00002504	PGF_00051773		276		Short-chain dehydrogenase/reductase SDR precursor
Clavibacter michiganensis strain PF008	28447.7	CP012573	fig|28447.7.peg.157	AES38_00785		PATRIC.28447.7.CP012573.CDS.161626.162069.rev	PATRIC	CDS	161626	162069	444	-	FIG00638284	PLF_1573_00001990	PGF_00197360		147		hypothetical protein
Clavibacter michiganensis strain PF008	28447.7	CP012573	fig|28447.7.peg.158	AES38_00790		PATRIC.28447.7.CP012573.CDS.162078.162335.rev	PATRIC	CDS	162078	162335	258	-	FIG00638284	PLF_1573_00000856	PGF_01253336		85		hypothetical protein
Clavibacter michiganensis strain PF008	28447.7	CP012573	fig|28447.7.peg.159	AES38_00795		PATRIC.28447.7.CP012573.CDS.162406.162624.rev	PATRIC	CDS	162406	162624	219	-		PLF_1573_00003615	PGF_00354816		72		hypothetical protein
Clavibacter michiganensis strain PF008	28447.7	CP012573	fig|28447.7.peg.160	AES38_00800		PATRIC.28447.7.CP012573.CDS.162681.163307.rev	PATRIC	CDS	162681	163307	627	-	FIG00000328	PLF_1573_00000523	PGF_00020963		208		Methylated-DNA--protein-cysteine methyltransferase (EC 2.1.1.63)
Clavibacter michiganensis strain PF008	28447.7	CP012573	fig|28447.7.peg.161	AES38_00805		PATRIC.28447.7.CP012573.CDS.163304.163828.rev	PATRIC	CDS	163304	163828	525	-	FIG00006092	PLF_1573_00001749	PGF_00046418		174		RNA polymerase sigma-54 factor RpoN
Clavibacter michiganensis strain PF008	28447.7	CP012573	fig|28447.7.peg.162	AES38_00810		PATRIC.28447.7.CP012573.CDS.164164.164901.fwd	PATRIC	CDS	164164	164901	738	+	FIG00945480	PLF_1573_00003048	PGF_00177419		245		putative two-component system, response regulator
Clavibacter michiganensis strain PF008	28447.7	CP012573	fig|28447.7.peg.163			PATRIC.28447.7.CP012573.CDS.165586.166434.fwd	PATRIC	CDS	165586	166434	849	+	FIG00512489	PLF_1573_00001442	PGF_01251303		282		Ice-structuring glycoprotein precursor (ISGP) (Antifreeze glycopeptide polyprotein) (AFGP polyprotein) [Contains: AFGP7 (AFGP 7); AFGP8 (AFGP 8); AFGP8-like] (Fragment)
Clavibacter michiganensis strain PF008	28447.7	CP012573	fig|28447.7.peg.164	AES38_00820		PATRIC.28447.7.CP012573.CDS.166522.167451.rev	PATRIC	CDS	166522	167451	930	-	FIG01393346		PGF_00403208		309		Bifunctional protein: zinc-containing alcohol dehydrogenase; quinone oxidoreductase ( NADPH:quinone reductase) (EC 1.1.1.-); Similar to arginate lyase
Clavibacter michiganensis strain PF008	28447.7	CP012573	fig|28447.7.peg.165	AES38_00825		PATRIC.28447.7.CP012573.CDS.167542.168036.fwd	PATRIC	CDS	167542	168036	495	+	FIG00554610		PGF_00059570		164		Transcriptional regulator, MarR family
Clavibacter michiganensis strain PF008	28447.7	CP012573	fig|28447.7.peg.166	AES38_00830		PATRIC.28447.7.CP012573.CDS.168143.169357.fwd	PATRIC	CDS	168143	169357	1215	+	FIG01307571	PLF_1573_00001719	PGF_00042604		404		Putative oxidoreductase
Clavibacter michiganensis strain PF008	28447.7	CP012573	fig|28447.7.peg.167	AES38_00835		PATRIC.28447.7.CP012573.CDS.169409.170095.fwd	PATRIC	CDS	169409	170095	687	+	FIG00761799	PLF_1573_00002710	PGF_00407599		228		putative integral membrane protein
Clavibacter michiganensis strain PF008	28447.7	CP012573	fig|28447.7.peg.168	AES38_00840		PATRIC.28447.7.CP012573.CDS.170273.170992.fwd	PATRIC	CDS	170273	170992	720	+	FIG00511178	PLF_1573_00001203	PGF_00419434		239		Conserved membrane protein in copper uptake, YcnI
Clavibacter michiganensis strain PF008	28447.7	CP012573	fig|28447.7.peg.169	AES38_00845		PATRIC.28447.7.CP012573.CDS.170989.172443.fwd	PATRIC	CDS	170989	172443	1455	+	FIG00012390	PLF_1573_00000829	PGF_00064760		484		Uncharacterized iron-regulated membrane protein; Iron-uptake factor PiuB
Clavibacter michiganensis strain PF008	28447.7	CP012573	fig|28447.7.peg.170	AES38_00850		PATRIC.28447.7.CP012573.CDS.172484.173497.rev	PATRIC	CDS	172484	173497	1014	-	FIG01701516	PLF_1573_00000272	PGF_00016468		337		LacI-family transcriptional regulatory protein
Clavibacter michiganensis strain PF008	28447.7	CP012573	fig|28447.7.peg.171	AES38_00855		PATRIC.28447.7.CP012573.CDS.173550.174257.rev	PATRIC	CDS	173550	174257	708	-	FIG00511258	PLF_1573_00001456	PGF_01251304		235		Integral membrane protein
Clavibacter michiganensis strain PF008	28447.7	CP012573	fig|28447.7.peg.172	AES38_00860		PATRIC.28447.7.CP012573.CDS.174357.175556.rev	PATRIC	CDS	174357	175556	1200	-	FIG00512153	PLF_1573_00002189	PGF_00400637		399		lipopolysaccharide biosynthesis protein, putative
Clavibacter michiganensis strain PF008	28447.7	CP012573	fig|28447.7.peg.173	AES38_00865		PATRIC.28447.7.CP012573.CDS.175654.176259.rev	PATRIC	CDS	175654	176259	606	-	FIG00945360	PLF_1573_00002904	PGF_01251667		201		Putative transmembrane protein
Clavibacter michiganensis strain PF008	28447.7	CP012573	fig|28447.7.peg.174	AES38_00870		PATRIC.28447.7.CP012573.CDS.176320.176571.rev	PATRIC	CDS	176320	176571	252	-	FIG00638284	PLF_1573_00002558	PGF_00101797		83		hypothetical protein
Clavibacter michiganensis strain PF008	28447.7	CP012573	fig|28447.7.peg.175	AES38_00875		PATRIC.28447.7.CP012573.CDS.176682.178490.fwd	PATRIC	CDS	176682	178490	1809	+	FIG00001690		PGF_00011705		602		High-affinity choline uptake protein BetT
Clavibacter michiganensis strain PF008	28447.7	CP012573	fig|28447.7.peg.176	AES38_00880		PATRIC.28447.7.CP012573.CDS.178576.178848.fwd	PATRIC	CDS	178576	178848	273	+		PLF_1573_00004594	PGF_01252811		90		hypothetical protein
Clavibacter michiganensis strain PF008	28447.7	CP012573	fig|28447.7.peg.177	AES38_00885		PATRIC.28447.7.CP012573.CDS.179014.179538.fwd	PATRIC	CDS	179014	179538	525	+	FIG00512167	PLF_1573_00000223	PGF_00419674		174		CrcB protein
Clavibacter michiganensis strain PF008	28447.7	CP012573	fig|28447.7.peg.178	AES38_00890		PATRIC.28447.7.CP012573.CDS.179535.179915.fwd	PATRIC	CDS	179535	179915	381	+	FIG00511695	PLF_1573_00000225	PGF_00419674		126		CrcB protein
Clavibacter michiganensis strain PF008	28447.7	CP012573	fig|28447.7.peg.179	AES38_00895		PATRIC.28447.7.CP012573.CDS.179912.180394.fwd	PATRIC	CDS	179912	180394	483	+	FIG01272034	PLF_1573_00002897	PGF_00039982		160		Putative acetyltransferase
Clavibacter michiganensis strain PF008	28447.7	CP012573	fig|28447.7.peg.180	AES38_00900		PATRIC.28447.7.CP012573.CDS.180391.181029.fwd	PATRIC	CDS	180391	181029	639	+	FIG00000367	PLF_1573_00000382	PGF_00013244		212		ADP-ribose pyrophosphatase (EC 3.6.1.13)
Clavibacter michiganensis strain PF008	28447.7	CP012573	fig|28447.7.peg.181	AES38_00905		PATRIC.28447.7.CP012573.CDS.181010.181849.rev	PATRIC	CDS	181010	181849	840	-	FIG00638284	PLF_1573_00004220	PGF_01252490		279		hypothetical protein
Clavibacter michiganensis strain PF008	28447.7	CP012573	fig|28447.7.peg.182	AES38_00910		PATRIC.28447.7.CP012573.CDS.181932.182594.rev	PATRIC	CDS	181932	182594	663	-	FIG01124340	PLF_1573_00002944	PGF_00062846		220		Two-component system response regulator
Clavibacter michiganensis strain PF008	28447.7	CP012573	fig|28447.7.peg.183	AES38_00915		PATRIC.28447.7.CP012573.CDS.182582.183778.rev	PATRIC	CDS	182582	183778	1197	-	FIG00638284	PLF_1573_00002945	PGF_00062944		398		Two-component system sensor kinase
Clavibacter michiganensis strain PF008	28447.7	CP012573	fig|28447.7.peg.184	AES38_00920		PATRIC.28447.7.CP012573.CDS.183978.184112.rev	PATRIC	CDS	183978	184112	135	-	FIG00000048	PLF_1573_00002363	PGF_00403189		44		Bifunctional deaminase-reductase domain protein
Clavibacter michiganensis strain PF008	28447.7	CP012573	fig|28447.7.peg.185			PATRIC.28447.7.CP012573.CDS.184104.184559.fwd	PATRIC	CDS	184104	184559	456	+	FIG00638284				151		hypothetical protein
Clavibacter michiganensis strain PF008	28447.7	CP012573	fig|28447.7.peg.186	AES38_00925		PATRIC.28447.7.CP012573.CDS.184754.185992.fwd	PATRIC	CDS	184754	185992	1239	+	FIG00013626	PLF_1573_00003049	PGF_00136166		412		N-Acetyl-D-glucosamine ABC transport system, sugar-binding protein
Clavibacter michiganensis strain PF008	28447.7	CP012573	fig|28447.7.peg.187	AES38_00930		PATRIC.28447.7.CP012573.CDS.185992.186981.fwd	PATRIC	CDS	185992	186981	990	+	FIG00089781	PLF_1573_00000627	PGF_00035104		329		Possible alpha-xyloside ABC transporter, permease component
Clavibacter michiganensis strain PF008	28447.7	CP012573	fig|28447.7.peg.188	AES38_00935		PATRIC.28447.7.CP012573.CDS.186974.187837.fwd	PATRIC	CDS	186974	187837	864	+	FIG00149662	PLF_1573_00000755	PGF_00054655		287		Sugar ABC transporter, permease protein
Clavibacter michiganensis strain PF008	28447.7	CP012573	fig|28447.7.peg.189	AES38_00940		PATRIC.28447.7.CP012573.CDS.187920.188690.fwd	PATRIC	CDS	187920	188690	771	+	FIG00511790	PLF_1573_00001912	PGF_00061803		256		Trehalose utilization protein
Clavibacter michiganensis strain PF008	28447.7	CP012573	fig|28447.7.peg.190	AES38_00945		PATRIC.28447.7.CP012573.CDS.188687.189895.fwd	PATRIC	CDS	188687	189895	1209	+	FIG01583289	PLF_1573_00000541	PGF_00023541		402		Myo-inositol 2-dehydrogenase (EC 1.1.1.18)
Clavibacter michiganensis strain PF008	28447.7	CP012573	fig|28447.7.peg.191	AES38_00950		PATRIC.28447.7.CP012573.CDS.189916.191265.fwd	PATRIC	CDS	189916	191265	1350	+	FIG00092279	PLF_1573_00000837	PGF_00067111		449		Xylose-responsive transcription regulator, ROK family
Clavibacter michiganensis strain PF008	28447.7	CP012573	fig|28447.7.peg.192	AES38_00955		PATRIC.28447.7.CP012573.CDS.191262.191918.fwd	PATRIC	CDS	191262	191918	657	+	FIG00112098	PLF_1573_00000682	PGF_00043224		218		Putative phosphatase YieH
Clavibacter michiganensis strain PF008	28447.7	CP012573	fig|28447.7.peg.193	AES38_00960		PATRIC.28447.7.CP012573.CDS.191938.192936.rev	PATRIC	CDS	191938	192936	999	-	FIG00511873	PLF_1573_00000069	PGF_01253305		332		FIG00511874: hypothetical protein
Clavibacter michiganensis strain PF008	28447.7	CP012573	fig|28447.7.peg.194	AES38_00965		PATRIC.28447.7.CP012573.CDS.193107.193697.fwd	PATRIC	CDS	193107	193697	591	+	FIG00132814	PLF_1573_00000598	PGF_00030976		196		Periplasmic chorismate mutase I precursor (EC 5.4.99.5)
Clavibacter michiganensis strain PF008	28447.7	CP012573	fig|28447.7.peg.195	AES38_00970		PATRIC.28447.7.CP012573.CDS.193835.194326.rev	PATRIC	CDS	193835	194326	492	-	FIG00511988	PLF_1573_00002145	PGF_01251441		163		FIG00511989: hypothetical protein
Clavibacter michiganensis strain PF008	28447.7	CP012573	fig|28447.7.peg.196	AES38_00975		PATRIC.28447.7.CP012573.CDS.194559.195008.rev	PATRIC	CDS	194559	195008	450	-		PLF_1573_00002144	PGF_00151428		149		hypothetical protein
Clavibacter michiganensis strain PF008	28447.7	CP012573	fig|28447.7.peg.197	AES38_00980		PATRIC.28447.7.CP012573.CDS.195068.196729.rev	PATRIC	CDS	195068	196729	1662	-	FIG00638284	PLF_1573_00004467	PGF_01252693		553		hypothetical protein
Clavibacter michiganensis strain PF008	28447.7	CP012573	fig|28447.7.peg.198			PATRIC.28447.7.CP012573.CDS.196902.197858.rev	PATRIC	CDS	196902	197858	957	-	FIG00638284				318		hypothetical protein
Clavibacter michiganensis strain PF008	28447.7	CP012573	fig|28447.7.peg.199	AES38_00985		PATRIC.28447.7.CP012573.CDS.197817.197975.fwd	PATRIC	CDS	197817	197975	159	+	FIG00638284	PLF_1573_00003641	PGF_01252082		52		hypothetical protein
Clavibacter michiganensis strain PF008	28447.7	CP012573	fig|28447.7.peg.200	AES38_00990		PATRIC.28447.7.CP012573.CDS.198054.199055.rev	PATRIC	CDS	198054	199055	1002	-	FIG00638284	PLF_1573_00003640	PGF_01252081		333		LacI-family transcriptional regulator
Clavibacter michiganensis strain PF008	28447.7	CP012573	fig|28447.7.peg.201			PATRIC.28447.7.CP012573.CDS.199250.200572.rev	PATRIC	CDS	199250	200572	1323	-	FIG00638284				440		hypothetical protein
Clavibacter michiganensis strain PF008	28447.7	CP012573	fig|28447.7.peg.202	AES38_01000		PATRIC.28447.7.CP012573.CDS.200625.201614.fwd	PATRIC	CDS	200625	201614	990	+	FIG01124750	PLF_1573_00003638	PGF_00011391		329		ABC-type sugar transport systems, permease components
Clavibacter michiganensis strain PF008	28447.7	CP012573	fig|28447.7.peg.203	AES38_01005		PATRIC.28447.7.CP012573.CDS.201614.202519.fwd	PATRIC	CDS	201614	202519	906	+	FIG01136790	PLF_1573_00003637	PGF_00054874		301		Sugar transport system
Clavibacter michiganensis strain PF008	28447.7	CP012573	fig|28447.7.peg.204	AES38_01010		PATRIC.28447.7.CP012573.CDS.202554.203816.rev	PATRIC	CDS	202554	203816	1263	-	FIG00133767	PLF_1573_00003636	PGF_00047536		420		Alpha-galactosidase precursor (EC 3.2.1.22)
Clavibacter michiganensis strain PF008	28447.7	CP012573	fig|28447.7.peg.205	AES38_01015		PATRIC.28447.7.CP012573.CDS.203813.205330.rev	PATRIC	CDS	203813	205330	1518	-	FIG00037240	PLF_1573_00003635	PGF_00046611		505		Alpha-N-arabinofuranosidase 2 (EC 3.2.1.55)
Clavibacter michiganensis strain PF008	28447.7	CP012573	fig|28447.7.peg.206	AES38_01020		PATRIC.28447.7.CP012573.CDS.205404.207734.rev	PATRIC	CDS	205404	207734	2331	-	FIG01328566	PLF_1573_00002482	PGF_00041827		776		Putative large secreted protein
Clavibacter michiganensis strain PF008	28447.7	CP012573	fig|28447.7.peg.207	AES38_01025		PATRIC.28447.7.CP012573.CDS.207982.208584.fwd	PATRIC	CDS	207982	208584	603	+	FIG00000089	PLF_1573_00001133	PGF_00035609		200		Adenylate kinase (EC 2.7.4.3)
Clavibacter michiganensis strain PF008	28447.7	CP012573	fig|28447.7.peg.208	AES38_01035		PATRIC.28447.7.CP012573.CDS.209528.210142.fwd	PATRIC	CDS	209528	210142	615	+	FIG00554417	PLF_1573_00000064	PGF_00058904		204		Transcriptional regulator, AcrR family
Clavibacter michiganensis strain PF008	28447.7	CP012573	fig|28447.7.peg.209	AES38_01040		PATRIC.28447.7.CP012573.CDS.210177.210704.rev	PATRIC	CDS	210177	210704	528	-					175		hypothetical protein
Clavibacter michiganensis strain PF008	28447.7	CP012573	fig|28447.7.peg.210	AES38_01045		PATRIC.28447.7.CP012573.CDS.210811.211722.rev	PATRIC	CDS	210811	211722	912	-	FIG00638284				303		Triacylglycerol lipase precursor (EC 3.1.1.3)
Clavibacter michiganensis strain PF008	28447.7	CP012573	fig|28447.7.peg.211	AES38_01050		PATRIC.28447.7.CP012573.CDS.211995.212687.rev	PATRIC	CDS	211995	212687	693	-	FIG00512185	PLF_1573_00002234	PGF_00410483		230		putative secreted protein
Clavibacter michiganensis strain PF008	28447.7	CP012573	fig|28447.7.peg.212	AES38_01055		PATRIC.28447.7.CP012573.CDS.212878.213384.fwd	PATRIC	CDS	212878	213384	507	+	FIG00952839	PLF_1573_00001750	PGF_00046477		168		RNA polymerase sigma-70 factor, ECF subfamily
Clavibacter michiganensis strain PF008	28447.7	CP012573	fig|28447.7.peg.213	AES38_01060		PATRIC.28447.7.CP012573.CDS.213381.214238.fwd	PATRIC	CDS	213381	214238	858	+	FIG00662487	PLF_1573_00000104	PGF_00408946		285		putative membrane protein
Clavibacter michiganensis strain PF008	28447.7	CP012573	fig|28447.7.peg.214	AES38_01065		PATRIC.28447.7.CP012573.CDS.214327.215706.fwd	PATRIC	CDS	214327	215706	1380	+	FIG01231596	PLF_1573_00000294	PGF_00018498		459		Macrolide-efflux protein
Clavibacter michiganensis strain PF008	28447.7	CP012573	fig|28447.7.peg.215	AES38_01070		PATRIC.28447.7.CP012573.CDS.216197.217207.rev	PATRIC	CDS	216197	217207	1011	-	FIG00511767	PLF_1573_00001756	PGF_01251325		336		Regulatory protein, LacI
Clavibacter michiganensis strain PF008	28447.7	CP012573	fig|28447.7.peg.216	AES38_01075		PATRIC.28447.7.CP012573.CDS.217429.218718.fwd	PATRIC	CDS	217429	218718	1290	+	FIG00002265	PLF_1573_00001283	PGF_00019153		429		Maltose/maltodextrin ABC transporter, substrate binding periplasmic protein MalE
Clavibacter michiganensis strain PF008	28447.7	CP012573	fig|28447.7.peg.217	AES38_01080		PATRIC.28447.7.CP012573.CDS.218729.219757.fwd	PATRIC	CDS	218729	219757	1029	+		PLF_1573_00002512	PGF_01251526		342		Sugar ABC transporter, permease protein
Clavibacter michiganensis strain PF008	28447.7	CP012573	fig|28447.7.peg.218	AES38_01085		PATRIC.28447.7.CP012573.CDS.219754.220659.fwd	PATRIC	CDS	219754	220659	906	+	FIG00945745	PLF_1573_00000205	PGF_00005123		301		ABC transporter, permease protein
Clavibacter michiganensis strain PF008	28447.7	CP012573	fig|28447.7.peg.219	AES38_01090		PATRIC.28447.7.CP012573.CDS.220656.223007.fwd	PATRIC	CDS	220656	223007	2352	+	FIG00001469	PLF_1573_00000252	PGF_00402764		783		Beta-xylosidase
Clavibacter michiganensis strain PF008	28447.7	CP012573	fig|28447.7.peg.220	AES38_01095		PATRIC.28447.7.CP012573.CDS.223088.223936.rev	PATRIC	CDS	223088	223936	849	-	FIG01321859	PLF_1573_00002875	PGF_00028588		282		Oxidoreductase
Clavibacter michiganensis strain PF008	28447.7	CP012573	fig|28447.7.peg.221	AES38_01100		PATRIC.28447.7.CP012573.CDS.224023.224760.fwd	PATRIC	CDS	224023	224760	738	+	FIG00554417	PLF_1573_00002926	PGF_00058904		245		Transcriptional regulator, AcrR family
Clavibacter michiganensis strain PF008	28447.7	CP012573	fig|28447.7.peg.222	AES38_01105		PATRIC.28447.7.CP012573.CDS.224785.225642.rev	PATRIC	CDS	224785	225642	858	-	FIG01326599	PLF_1573_00000662	PGF_00039315		285		Putative DNA-binding protein
Clavibacter michiganensis strain PF008	28447.7	CP012573	fig|28447.7.peg.223	AES38_01110		PATRIC.28447.7.CP012573.CDS.225744.226424.fwd	PATRIC	CDS	225744	226424	681	+	FIG00546160	PLF_1573_00001808	PGF_00051650		226		Short-chain dehydrogenase
Clavibacter michiganensis strain PF008	28447.7	CP012573	fig|28447.7.peg.224	AES38_01115		PATRIC.28447.7.CP012573.CDS.226491.226889.fwd	PATRIC	CDS	226491	226889	399	+	FIG00511742	PLF_1573_00000858	PGF_00213111		132		FIG00511743: hypothetical protein
Clavibacter michiganensis strain PF008	28447.7	CP012573	fig|28447.7.peg.225	AES38_01120		PATRIC.28447.7.CP012573.CDS.226892.227161.rev	PATRIC	CDS	226892	227161	270	-					89		hypothetical protein
Clavibacter michiganensis strain PF008	28447.7	CP012573	fig|28447.7.peg.226	AES38_01125		PATRIC.28447.7.CP012573.CDS.227258.228151.fwd	PATRIC	CDS	227258	228151	894	+	FIG00000681	PLF_1573_00000213	PGF_00402302		297		Beta-lactamase class C and other penicillin binding proteins
Clavibacter michiganensis strain PF008	28447.7	CP012573	fig|28447.7.peg.227	AES38_01130		PATRIC.28447.7.CP012573.CDS.228161.228580.rev	PATRIC	CDS	228161	228580	420	-	FIG01304277	PLF_1573_00002492	PGF_00048374		139		Rhodanese-related sulfurtransferase
Clavibacter michiganensis strain PF008	28447.7	CP012573	fig|28447.7.peg.228	AES38_01135		PATRIC.28447.7.CP012573.CDS.228675.229133.fwd	PATRIC	CDS	228675	229133	459	+	FIG00003800		PGF_00059044		152		Transcriptional regulator, AsnC family
Clavibacter michiganensis strain PF008	28447.7	CP012573	fig|28447.7.peg.229	AES38_01140		PATRIC.28447.7.CP012573.CDS.229275.230516.fwd	PATRIC	CDS	229275	230516	1242	+	FIG00511806	PLF_1573_00001517	PGF_00415105		413		COG family: RecA-superfamily ATPases implicated in signal transduction
Clavibacter michiganensis strain PF008	28447.7	CP012573	fig|28447.7.peg.230	AES38_01145		PATRIC.28447.7.CP012573.CDS.230714.232237.fwd	PATRIC	CDS	230714	232237	1524	+	FIG00007157	PLF_1573_00001190	PGF_00046559		507		Alpha-N-arabinofuranosidase (EC 3.2.1.55)
Clavibacter michiganensis strain PF008	28447.7	CP012573	fig|28447.7.peg.231			PATRIC.28447.7.CP012573.CDS.232502.233059.fwd	PATRIC	CDS	232502	233059	558	+		PLF_1573_00003053	PGF_01251738		185		hypothetical protein
Clavibacter michiganensis strain PF008	28447.7	CP012573	fig|28447.7.peg.232			PATRIC.28447.7.CP012573.CDS.233031.233717.rev	PATRIC	CDS	233031	233717	687	-	FIG00638284				228		hypothetical protein
Clavibacter michiganensis strain PF008	28447.7	CP012573	fig|28447.7.peg.233			PATRIC.28447.7.CP012573.CDS.233730.233855.rev	PATRIC	CDS	233730	233855	126	-					41		hypothetical protein
Clavibacter michiganensis strain PF008	28447.7	CP012573	fig|28447.7.peg.234	AES38_01160		PATRIC.28447.7.CP012573.CDS.234051.234644.rev	PATRIC	CDS	234051	234644	594	-	FIG01272034	PLF_1573_00002286	PGF_00027274		197		Acetyltransferase
Clavibacter michiganensis strain PF008	28447.7	CP012573	fig|28447.7.peg.235	AES38_01165		PATRIC.28447.7.CP012573.CDS.234758.235201.rev	PATRIC	CDS	234758	235201	444	-	FIG00511855	PLF_1573_00000071	PGF_01253308		147		FIG00511856: hypothetical protein
Clavibacter michiganensis strain PF008	28447.7	CP012573	fig|28447.7.peg.236	AES38_01170		PATRIC.28447.7.CP012573.CDS.235586.235930.rev	PATRIC	CDS	235586	235930	345	-	FIG00512372	PLF_1573_00002742	PGF_00104461		114		Protein lsr2 precursor
Clavibacter michiganensis strain PF008	28447.7	CP012573	fig|28447.7.peg.237	AES38_01175		PATRIC.28447.7.CP012573.CDS.236027.237097.fwd	PATRIC	CDS	236027	237097	1071	+	FIG00017190	PLF_1573_00000678	PGF_00042159		356		Putative metal chaperone, involved in Zn homeostasis, GTPase of COG0523 family
Clavibacter michiganensis strain PF008	28447.7	CP012573	fig|28447.7.peg.238	AES38_01180		PATRIC.28447.7.CP012573.CDS.237110.237763.rev	PATRIC	CDS	237110	237763	654	-	FIG00059280		PGF_00413340		217		tRNA-dihydrouridine(16) synthase
Clavibacter michiganensis strain PF008	28447.7	CP012573	fig|28447.7.peg.239			PATRIC.28447.7.CP012573.CDS.237820.238761.fwd	PATRIC	CDS	237820	238761	942	+	FIG00005113	PLF_1573_00002959	PGF_00067455		313		Zinc ABC transporter, permease protein ZnuB
Clavibacter michiganensis strain PF008	28447.7	CP012573	fig|28447.7.peg.240	AES38_01190		PATRIC.28447.7.CP012573.CDS.238821.240056.fwd	PATRIC	CDS	238821	240056	1236	+	FIG00638284	PLF_1573_00002958	PGF_00067454		411		Zinc ABC transporter, permease protein ZnuB
Clavibacter michiganensis strain PF008	28447.7	CP012573	fig|28447.7.peg.241	AES38_01195		PATRIC.28447.7.CP012573.CDS.240053.240979.fwd	PATRIC	CDS	240053	240979	927	+	FIG00021555	PLF_1573_00002960	PGF_00067463		308		Zinc ABC transporter, substrate-binding protein ZnuA
Clavibacter michiganensis strain PF008	28447.7	CP012573	fig|28447.7.peg.242	AES38_01200		PATRIC.28447.7.CP012573.CDS.241014.242225.fwd	PATRIC	CDS	241014	242225	1212	+	FIG00005113	PLF_1573_00002957	PGF_00067456		403		Zinc ABC transporter, permease protein ZnuB
Clavibacter michiganensis strain PF008	28447.7	CP012573	fig|28447.7.peg.243	AES38_01205		PATRIC.28447.7.CP012573.CDS.242465.243658.fwd	PATRIC	CDS	242465	243658	1194	+	FIG00638284	PLF_1573_00003151	PGF_01251814		397		Zeaxanthin glucosyl transferase
Clavibacter michiganensis strain PF008	28447.7	CP012573	fig|28447.7.peg.244	AES38_01210		PATRIC.28447.7.CP012573.CDS.243750.243989.rev	PATRIC	CDS	243750	243989	240	-		PLF_1573_00003624	PGF_01252077		79		hypothetical protein
Clavibacter michiganensis strain PF008	28447.7	CP012573	fig|28447.7.peg.245	AES38_01215		PATRIC.28447.7.CP012573.CDS.244211.245197.fwd	PATRIC	CDS	244211	245197	987	+	FIG00018396	PLF_1573_00001848	PGF_00056792		328		Thioredoxin reductase (EC 1.8.1.9)
Clavibacter michiganensis strain PF008	28447.7	CP012573	fig|28447.7.peg.246			PATRIC.28447.7.CP012573.CDS.245264.247456.fwd	PATRIC	CDS	245264	247456	2193	+	FIG00025216	PLF_1573_00000490	PGF_00418155		730		ClpB protein
Clavibacter michiganensis strain PF008	28447.7	CP012573	fig|28447.7.peg.247	AES38_01225		PATRIC.28447.7.CP012573.CDS.247522.249705.rev	PATRIC	CDS	247522	249705	2184	-	FIG00002020	PLF_1573_00001509	PGF_00047494		727		Alpha-galactosidase (EC 3.2.1.22)
Clavibacter michiganensis strain PF008	28447.7	CP012573	fig|28447.7.peg.248	AES38_01230		PATRIC.28447.7.CP012573.CDS.249811.250164.rev	PATRIC	CDS	249811	250164	354	-	FIG00638284	PLF_1573_00002064	PGF_01251395		117		hypothetical protein
Clavibacter michiganensis strain PF008	28447.7	CP012573	fig|28447.7.peg.249	AES38_01235		PATRIC.28447.7.CP012573.CDS.250268.251272.fwd	PATRIC	CDS	250268	251272	1005	+		PLF_1573_00000258	PGF_00016122		334		L-glyceraldehyde 3-phosphate reductase
Clavibacter michiganensis strain PF008	28447.7	CP012573	fig|28447.7.peg.250	AES38_01240		PATRIC.28447.7.CP012573.CDS.251280.252485.fwd	PATRIC	CDS	251280	252485	1206	+	FIG00672180	PLF_1573_00001701	PGF_00040647		401		Putative dipeptidase
Clavibacter michiganensis strain PF008	28447.7	CP012573	fig|28447.7.peg.251	AES38_01245		PATRIC.28447.7.CP012573.CDS.252482.253315.fwd	PATRIC	CDS	252482	253315	834	+	FIG01272034	PLF_1573_00002869	PGF_00023956		277		N-acetyltransferase, GCN5-family
Clavibacter michiganensis strain PF008	28447.7	CP012573	fig|28447.7.peg.252	AES38_01250		PATRIC.28447.7.CP012573.CDS.253348.255174.rev	PATRIC	CDS	253348	255174	1827	-	FIG00511967	PLF_1573_00002226	PGF_00408713		608		putative membrane protein
Clavibacter michiganensis strain PF008	28447.7	CP012573	fig|28447.7.peg.253	AES38_01255		PATRIC.28447.7.CP012573.CDS.255167.255562.rev	PATRIC	CDS	255167	255562	396	-	FIG00638284	PLF_1573_00000913	PGF_01253371		131		hypothetical protein
Clavibacter michiganensis strain PF008	28447.7	CP012573	fig|28447.7.peg.254	AES38_01260		PATRIC.28447.7.CP012573.CDS.255599.257023.rev	PATRIC	CDS	255599	257023	1425	-	FIG00000747	PLF_1573_00000212	PGF_00402188		474		Beta-lactamase (EC 3.5.2.6)
Clavibacter michiganensis strain PF008	28447.7	CP012573	fig|28447.7.peg.255	AES38_01265		PATRIC.28447.7.CP012573.CDS.257118.258344.rev	PATRIC	CDS	257118	258344	1227	-	FIG00511511	PLF_1573_00001057	PGF_00409975		408		putative peptidoglycan binding domain protein
Clavibacter michiganensis strain PF008	28447.7	CP012573	fig|28447.7.peg.256	AES38_01270		PATRIC.28447.7.CP012573.CDS.258566.259018.rev	PATRIC	CDS	258566	259018	453	-	FIG00511744	PLF_1573_00002212	PGF_01251470		150		putative integral membrane protein
Clavibacter michiganensis strain PF008	28447.7	CP012573	fig|28447.7.peg.257	AES38_01275		PATRIC.28447.7.CP012573.CDS.259111.259716.rev	PATRIC	CDS	259111	259716	606	-	FIG00511801	PLF_1573_00000997	PGF_01253426		201		FIG00511803: hypothetical protein
Clavibacter michiganensis strain PF008	28447.7	CP012573	fig|28447.7.peg.258	AES38_01280		PATRIC.28447.7.CP012573.CDS.259716.260291.rev	PATRIC	CDS	259716	260291	576	-	FIG00512158	PLF_1573_00002143	PGF_00217802		191		FIG00512159: hypothetical protein
Clavibacter michiganensis strain PF008	28447.7	CP012573	fig|28447.7.peg.259	AES38_01285		PATRIC.28447.7.CP012573.CDS.260288.260662.rev	PATRIC	CDS	260288	260662	375	-	FIG00512437	PLF_1573_00002153	PGF_01251448		124		FIG00512438: hypothetical protein
Clavibacter michiganensis strain PF008	28447.7	CP012573	fig|28447.7.peg.260	AES38_01290		PATRIC.28447.7.CP012573.CDS.260659.260847.rev	PATRIC	CDS	260659	260847	189	-		PLF_1573_00002272	PGF_01251496		62		hypothetical protein
Clavibacter michiganensis strain PF008	28447.7	CP012573	fig|28447.7.peg.261	AES38_01295		PATRIC.28447.7.CP012573.CDS.260844.261287.rev	PATRIC	CDS	260844	261287	444	-	FIG01617106	PLF_1573_00000013	PGF_00040640		147		Alkaline shock protein 23
Clavibacter michiganensis strain PF008	28447.7	CP012573	fig|28447.7.peg.262	AES38_01300		PATRIC.28447.7.CP012573.CDS.261481.262590.rev	PATRIC	CDS	261481	262590	1110	-	FIG00628273	PLF_1573_00001871	PGF_00058955		369		Transcriptional regulator, AraC family
Clavibacter michiganensis strain PF008	28447.7	CP012573	fig|28447.7.peg.263	AES38_01305		PATRIC.28447.7.CP012573.CDS.262752.263693.rev	PATRIC	CDS	262752	263693	942	-	FIG00512077	PLF_1573_00000009	PGF_00124480		313		FIG00512079: hypothetical protein
Clavibacter michiganensis strain PF008	28447.7	CP012573	fig|28447.7.peg.264	AES38_01310		PATRIC.28447.7.CP012573.CDS.263870.264448.rev	PATRIC	CDS	263870	264448	579	-		PLF_1573_00004324	PGF_01252568		192		hypothetical protein
Clavibacter michiganensis strain PF008	28447.7	CP012573	fig|28447.7.peg.265	AES38_01315		PATRIC.28447.7.CP012573.CDS.264654.265499.fwd	PATRIC	CDS	264654	265499	846	+	FIG00143722	PLF_1573_00003587	PGF_00061823		281		Triacylglycerol lipase precursor (EC 3.1.1.3)
Clavibacter michiganensis strain PF008	28447.7	CP012573	fig|28447.7.peg.266	AES38_01320		PATRIC.28447.7.CP012573.CDS.265577.266671.fwd	PATRIC	CDS	265577	266671	1095	+	FIG01315921	PLF_1573_00003586	PGF_00053902		364		Spore photoproduct lyase (EC 4.1.99.14)
Clavibacter michiganensis strain PF008	28447.7	CP012573	fig|28447.7.peg.267	AES38_01325		PATRIC.28447.7.CP012573.CDS.266747.267046.fwd	PATRIC	CDS	266747	267046	300	+					99		hypothetical protein
Clavibacter michiganensis strain PF008	28447.7	CP012573	fig|28447.7.peg.268	AES38_01330		PATRIC.28447.7.CP012573.CDS.267069.267623.rev	PATRIC	CDS	267069	267623	555	-	FIG00638284				184		hypothetical protein
Clavibacter michiganensis strain PF008	28447.7	CP012573	fig|28447.7.peg.269	AES38_01335		PATRIC.28447.7.CP012573.CDS.267683.268411.fwd	PATRIC	CDS	267683	268411	729	+					242		hypothetical protein
Clavibacter michiganensis strain PF008	28447.7	CP012573	fig|28447.7.peg.270	AES38_01340		PATRIC.28447.7.CP012573.CDS.268476.269018.rev	PATRIC	CDS	268476	269018	543	-	FIG00638284	PLF_1573_00000168	PGF_00007243		180		ABC-type Mn/Zn transport systems, ATPase component
Clavibacter michiganensis strain PF008	28447.7	CP012573	fig|28447.7.peg.271	AES38_01345		PATRIC.28447.7.CP012573.CDS.269271.269663.fwd	PATRIC	CDS	269271	269663	393	+		PLF_1573_00003023	PGF_01251715		130		hypothetical protein
Clavibacter michiganensis strain PF008	28447.7	CP012573	fig|28447.7.peg.272	AES38_01350		PATRIC.28447.7.CP012573.CDS.269742.272924.rev	PATRIC	CDS	269742	272924	3183	-	FIG00009194	PLF_1573_00001510	PGF_00048312		1060		Alpha-mannosidase (EC 3.2.1.24)
Clavibacter michiganensis strain PF008	28447.7	CP012573	fig|28447.7.peg.273	AES38_01355		PATRIC.28447.7.CP012573.CDS.272990.274333.rev	PATRIC	CDS	272990	274333	1344	-	FIG00001882	PLF_1573_00000138	PGF_00427167		447		6-phospho-beta-glucosidase (EC 3.2.1.86)
Clavibacter michiganensis strain PF008	28447.7	CP012573	fig|28447.7.peg.274	AES38_01360		PATRIC.28447.7.CP012573.CDS.274330.275076.rev	PATRIC	CDS	274330	275076	747	-	FIG00001119	PLF_1573_00000149	PGF_01251307		248		Glycerol-3-phosphate regulon repressor GlpR
Clavibacter michiganensis strain PF008	28447.7	CP012573	fig|28447.7.peg.275	AES38_01365		PATRIC.28447.7.CP012573.CDS.275281.276288.fwd	PATRIC	CDS	275281	276288	1008	+	FIG00945810	PLF_1573_00001023	PGF_00406486		335		putative carbohydrate kinase
Clavibacter michiganensis strain PF008	28447.7	CP012573	fig|28447.7.peg.276	AES38_01370		PATRIC.28447.7.CP012573.CDS.276362.277648.fwd	PATRIC	CDS	276362	277648	1287	+	FIG00511261	PLF_1573_00000757	PGF_00054736		428		Sugar ABC transporter, substrate-binding protein
Clavibacter michiganensis strain PF008	28447.7	CP012573	fig|28447.7.peg.277	AES38_01375		PATRIC.28447.7.CP012573.CDS.277645.278643.fwd	PATRIC	CDS	277645	278643	999	+	FIG00945184	PLF_1573_00000802	PGF_00060652		332		Transport permease
Clavibacter michiganensis strain PF008	28447.7	CP012573	fig|28447.7.peg.278	AES38_01380		PATRIC.28447.7.CP012573.CDS.278640.279563.fwd	PATRIC	CDS	278640	279563	924	+	FIG00945745	PLF_1573_00000756	PGF_00054668		307		Sugar ABC transporter, permease protein
Clavibacter michiganensis strain PF008	28447.7	CP012573	fig|28447.7.peg.279	AES38_01385		PATRIC.28447.7.CP012573.CDS.279560.280342.fwd	PATRIC	CDS	279560	280342	783	+	FIG00000645	PLF_1573_00000046	PGF_00007921		260		Glucosamine-6-phosphate deaminase (EC 3.5.99.6)
Clavibacter michiganensis strain PF008	28447.7	CP012573	fig|28447.7.peg.280	AES38_01390		PATRIC.28447.7.CP012573.CDS.280415.280987.fwd	PATRIC	CDS	280415	280987	573	+	FIG01132576	PLF_1573_00001587	PGF_00024921		190		NADPH:quinone oxidoreductase
Clavibacter michiganensis strain PF008	28447.7	CP012573	fig|28447.7.peg.281	AES38_01395		PATRIC.28447.7.CP012573.CDS.281049.283394.rev	PATRIC	CDS	281049	283394	2346	-	FIG00018388		PGF_00040960		781		Putative glycosyl hydrolase of unknown function (DUF1680)
Clavibacter michiganensis strain PF008	28447.7	CP012573	fig|28447.7.peg.282	AES38_01400		PATRIC.28447.7.CP012573.CDS.283602.284888.fwd	PATRIC	CDS	283602	284888	1287	+	FIG00638284	PLF_1573_00003585	PGF_01252055		428		hypothetical protein
Clavibacter michiganensis strain PF008	28447.7	CP012573	fig|28447.7.peg.283	AES38_01405		PATRIC.28447.7.CP012573.CDS.284885.285835.fwd	PATRIC	CDS	284885	285835	951	+	FIG00638284	PLF_1573_00004195	PGF_00091845		316		hypothetical protein
Clavibacter michiganensis strain PF008	28447.7	CP012573	fig|28447.7.peg.284	AES38_01410		PATRIC.28447.7.CP012573.CDS.285832.286740.fwd	PATRIC	CDS	285832	286740	909	+		PLF_1573_00004203	PGF_01252479		302		hypothetical protein
Clavibacter michiganensis strain PF008	28447.7	CP012573	fig|28447.7.peg.285			PATRIC.28447.7.CP012573.CDS.286721.287908.rev	PATRIC	CDS	286721	287908	1188	-	FIG00638284				395		hypothetical protein
Clavibacter michiganensis strain PF008	28447.7	CP012573	fig|28447.7.peg.286	AES38_01420		PATRIC.28447.7.CP012573.CDS.288048.288338.fwd	PATRIC	CDS	288048	288338	291	+					96		hypothetical protein
Clavibacter michiganensis strain PF008	28447.7	CP012573	fig|28447.7.peg.287			PATRIC.28447.7.CP012573.CDS.288350.288526.fwd	PATRIC	CDS	288350	288526	177	+					58		hypothetical protein
Clavibacter michiganensis strain PF008	28447.7	CP012573	fig|28447.7.peg.288	AES38_01425		PATRIC.28447.7.CP012573.CDS.288721.289770.fwd	PATRIC	CDS	288721	289770	1050	+	FIG00006600	PLF_1573_00001386	PGF_00001606		349		ABC transporter (iron.B12.siderophore.hemin), periplasmic substrate-binding component
Clavibacter michiganensis strain PF008	28447.7	CP012573	fig|28447.7.peg.289	AES38_01430		PATRIC.28447.7.CP012573.CDS.289740.290843.fwd	PATRIC	CDS	289740	290843	1104	+	FIG00058983	PLF_1573_00000463	PGF_00001621		367		ABC transporter (iron.B12.siderophore.hemin), permease component
Clavibacter michiganensis strain PF008	28447.7	CP012573	fig|28447.7.peg.290	AES38_01435		PATRIC.28447.7.CP012573.CDS.290840.291610.fwd	PATRIC	CDS	290840	291610	771	+	FIG00136665	PLF_1573_00000156	PGF_00001593		256		ABC transporter (iron.B12.siderophore.hemin), ATP-binding component
Clavibacter michiganensis strain PF008	28447.7	CP012573	fig|28447.7.peg.291	AES38_01440		PATRIC.28447.7.CP012573.CDS.291686.292486.fwd	PATRIC	CDS	291686	292486	801	+	FIG00022300	PLF_1573_00000824	PGF_00064074		266		UDP-glucose 4-epimerase (EC 5.1.3.2)
Clavibacter michiganensis strain PF008	28447.7	CP012573	fig|28447.7.peg.292	AES38_01445		PATRIC.28447.7.CP012573.CDS.292541.293815.fwd	PATRIC	CDS	292541	293815	1275	+	FIG00742481	PLF_1573_00000601	PGF_01253290		424		Permease of the major facilitator superfamily
Clavibacter michiganensis strain PF008	28447.7	CP012573	fig|28447.7.peg.293	AES38_01450		PATRIC.28447.7.CP012573.CDS.293919.296651.fwd	PATRIC	CDS	293919	296651	2733	+	FIG00000711	PLF_1573_00000609	PGF_00033392		910		Phosphoenolpyruvate carboxylase (EC 4.1.1.31)
Clavibacter michiganensis strain PF008	28447.7	CP012573	fig|28447.7.peg.294			PATRIC.28447.7.CP012573.CDS.296664.297074.fwd	PATRIC	CDS	296664	297074	411	+					136		hypothetical protein
Clavibacter michiganensis strain PF008	28447.7	CP012573	fig|28447.7.peg.295	AES38_01460		PATRIC.28447.7.CP012573.CDS.297270.297593.rev	PATRIC	CDS	297270	297593	324	-					107		hypothetical protein
Clavibacter michiganensis strain PF008	28447.7	CP012573	fig|28447.7.peg.296	AES38_01465		PATRIC.28447.7.CP012573.CDS.297688.297996.rev	PATRIC	CDS	297688	297996	309	-					102		hypothetical protein
Clavibacter michiganensis strain PF008	28447.7	CP012573	fig|28447.7.peg.297			PATRIC.28447.7.CP012573.CDS.298083.298211.fwd	PATRIC	CDS	298083	298211	129	+					42		hypothetical protein
Clavibacter michiganensis strain PF008	28447.7	CP012573	fig|28447.7.peg.298	AES38_01470		PATRIC.28447.7.CP012573.CDS.298351.299400.fwd	PATRIC	CDS	298351	299400	1050	+	FIG00638284				349		hypothetical protein
Clavibacter michiganensis strain PF008	28447.7	CP012573	fig|28447.7.peg.299	AES38_01475		PATRIC.28447.7.CP012573.CDS.299737.300114.fwd	PATRIC	CDS	299737	300114	378	+	FIG00638284				125		hypothetical protein
Clavibacter michiganensis strain PF008	28447.7	CP012573	fig|28447.7.peg.300	AES38_01480		PATRIC.28447.7.CP012573.CDS.300392.301492.rev	PATRIC	CDS	300392	301492	1101	-	FIG00000679	PLF_1573_00000287	PGF_00017617		366		Low-specificity L-threonine aldolase (EC 4.1.2.48)
Clavibacter michiganensis strain PF008	28447.7	CP012573	fig|28447.7.peg.301	AES38_01485		PATRIC.28447.7.CP012573.CDS.301543.302199.rev	PATRIC	CDS	301543	302199	657	-	FIG00340332	PLF_1573_00000044	PGF_00006737		218		GDP-mannose pyrophosphatase NudK
Clavibacter michiganensis strain PF008	28447.7	CP012573	fig|28447.7.peg.302	AES38_01490		PATRIC.28447.7.CP012573.CDS.302270.303538.rev	PATRIC	CDS	302270	303538	1269	-	FIG00883249	PLF_1573_00002513	PGF_00055029		422		Sulfide-quinone reductase
Clavibacter michiganensis strain PF008	28447.7	CP012573	fig|28447.7.peg.303	AES38_01495		PATRIC.28447.7.CP012573.CDS.303602.303949.rev	PATRIC	CDS	303602	303949	348	-		PLF_1573_00004500	PGF_01252726		115		hypothetical protein
Clavibacter michiganensis strain PF008	28447.7	CP012573	fig|28447.7.peg.304	AES38_01500		PATRIC.28447.7.CP012573.CDS.303946.304626.rev	PATRIC	CDS	303946	304626	681	-		PLF_1573_00003582	PGF_01252053		226		FIG00511486: hypothetical protein
Clavibacter michiganensis strain PF008	28447.7	CP012573	fig|28447.7.peg.305	AES38_01505		PATRIC.28447.7.CP012573.CDS.304623.305111.rev	PATRIC	CDS	304623	305111	489	-		PLF_1573_00004374	PGF_01252613		162		hypothetical protein
Clavibacter michiganensis strain PF008	28447.7	CP012573	fig|28447.7.peg.306	AES38_01510		PATRIC.28447.7.CP012573.CDS.305466.305915.fwd	PATRIC	CDS	305466	305915	450	+	FIG01617106	PLF_1573_00000013	PGF_00040640		149		Alkaline shock protein 23
Clavibacter michiganensis strain PF008	28447.7	CP012573	fig|28447.7.peg.307	AES38_01515		PATRIC.28447.7.CP012573.CDS.306005.306556.rev	PATRIC	CDS	306005	306556	552	-	FIG00638284	PLF_1573_00002063	PGF_01251394		183		hypothetical protein
Clavibacter michiganensis strain PF008	28447.7	CP012573	fig|28447.7.peg.308	AES38_01520		PATRIC.28447.7.CP012573.CDS.306730.307860.rev	PATRIC	CDS	306730	307860	1131	-	FIG00511197	PLF_1573_00000154	PGF_00001559		376		ABC transporter
Clavibacter michiganensis strain PF008	28447.7	CP012573	fig|28447.7.peg.309	AES38_01525		PATRIC.28447.7.CP012573.CDS.307857.308738.rev	PATRIC	CDS	307857	308738	882	-	FIG00744535	PLF_1573_00001497	PGF_00003367		293		ABC transporter, ATP-binding protein
Clavibacter michiganensis strain PF008	28447.7	CP012573	fig|28447.7.peg.310			PATRIC.28447.7.CP012573.CDS.308839.309126.fwd	PATRIC	CDS	308839	309126	288	+		PLF_1573_00002133	PGF_01251437		95		FIG00512025: hypothetical protein
Clavibacter michiganensis strain PF008	28447.7	CP012573	fig|28447.7.peg.311	AES38_01535		PATRIC.28447.7.CP012573.CDS.309117.310007.rev	PATRIC	CDS	309117	310007	891	-	FIG00127296	PLF_1573_00000329	PGF_00007899		296		Gluconolactonase (EC 3.1.1.17)
Clavibacter michiganensis strain PF008	28447.7	CP012573	fig|28447.7.peg.312	AES38_01540		PATRIC.28447.7.CP012573.CDS.310004.310813.rev	PATRIC	CDS	310004	310813	810	-	FIG00621114	PLF_1573_00002289	PGF_00420719		269		3-oxoacyl-[acyl-carrier protein] reductase (EC 1.1.1.100)
Clavibacter michiganensis strain PF008	28447.7	CP012573	fig|28447.7.peg.313	AES38_01545		PATRIC.28447.7.CP012573.CDS.310876.311649.fwd	PATRIC	CDS	310876	311649	774	+	FIG00546160	PLF_1573_00000247	PGF_00422830		257		Dehydrogenases with different specificities (related to short-chain alcohol dehydrogenases)
Clavibacter michiganensis strain PF008	28447.7	CP012573	fig|28447.7.peg.314	AES38_01550		PATRIC.28447.7.CP012573.CDS.311663.312403.rev	PATRIC	CDS	311663	312403	741	-	FIG01307606	PLF_1573_00002415	PGF_00422230		246		DNA-binding response regulator, LuxR family
Clavibacter michiganensis strain PF008	28447.7	CP012573	fig|28447.7.peg.315	AES38_01555		PATRIC.28447.7.CP012573.CDS.312400.313812.rev	PATRIC	CDS	312400	313812	1413	-	FIG01170547	PLF_1573_00000813	PGF_00062944		470		Two-component system sensor kinase
Clavibacter michiganensis strain PF008	28447.7	CP012573	fig|28447.7.peg.316	AES38_01560		PATRIC.28447.7.CP012573.CDS.314119.315729.fwd	PATRIC	CDS	314119	315729	1611	+	FIG01336429	PLF_1573_00000688	PGF_00044542		536		Putative transmembrane efflux protein
Clavibacter michiganensis strain PF008	28447.7	CP012573	fig|28447.7.peg.317	AES38_01565		PATRIC.28447.7.CP012573.CDS.315811.316659.rev	PATRIC	CDS	315811	316659	849	-		PLF_1573_00000051	PGF_00012783		282		Hydrolase, alpha/beta hydrolase fold family
Clavibacter michiganensis strain PF008	28447.7	CP012573	fig|28447.7.peg.318	AES38_01570		PATRIC.28447.7.CP012573.CDS.316747.317433.fwd	PATRIC	CDS	316747	317433	687	+	FIG00638284	PLF_1573_00002595	PGF_01251543		228		hypothetical protein
Clavibacter michiganensis strain PF008	28447.7	CP012573	fig|28447.7.peg.319	AES38_01575		PATRIC.28447.7.CP012573.CDS.317445.318878.rev	PATRIC	CDS	317445	318878	1434	-		PLF_1573_00002594	PGF_00383626		477		Phytoene dehydrogenase (EC 1.14.99.-)
Clavibacter michiganensis strain PF008	28447.7	CP012573	fig|28447.7.peg.320	AES38_01580		PATRIC.28447.7.CP012573.CDS.318875.319777.rev	PATRIC	CDS	318875	319777	903	-	FIG00121127	PLF_1573_00002348	PGF_00017730		300		Lycopene elongase (EC 2.5.1.-)
Clavibacter michiganensis strain PF008	28447.7	CP012573	fig|28447.7.peg.321	AES38_01585		PATRIC.28447.7.CP012573.CDS.319845.321032.fwd	PATRIC	CDS	319845	321032	1188	+	FIG00638284	PLF_1573_00001988	PGF_00115085		395		hypothetical protein
Clavibacter michiganensis strain PF008	28447.7	CP012573	fig|28447.7.peg.322	AES38_01590		PATRIC.28447.7.CP012573.CDS.321073.321786.rev	PATRIC	CDS	321073	321786	714	-	FIG00546160	PLF_1573_00001620	PGF_00028697		237		Oxidoreductase homolog
Clavibacter michiganensis strain PF008	28447.7	CP012573	fig|28447.7.peg.323	AES38_01595		PATRIC.28447.7.CP012573.CDS.321918.322337.fwd	PATRIC	CDS	321918	322337	420	+	FIG01122687	PLF_1573_00000666	PGF_00039477		139		Putative MerR-family transcriptional regulator
Clavibacter michiganensis strain PF008	28447.7	CP012573	fig|28447.7.peg.324	AES38_01600		PATRIC.28447.7.CP012573.CDS.322365.322727.rev	PATRIC	CDS	322365	322727	363	-	FIG00511839	PLF_1573_00000912	PGF_00162666		120		FIG00511840: hypothetical protein
Clavibacter michiganensis strain PF008	28447.7	CP012573	fig|28447.7.peg.325	AES38_01605		PATRIC.28447.7.CP012573.CDS.322817.323347.fwd	PATRIC	CDS	322817	323347	531	+	FIG00025887	PLF_1573_00000581	PGF_00027468		176		Organic hydroperoxide resistance transcriptional regulator
Clavibacter michiganensis strain PF008	28447.7	CP012573	fig|28447.7.peg.326	AES38_01610		PATRIC.28447.7.CP012573.CDS.323407.323829.fwd	PATRIC	CDS	323407	323829	423	+	FIG00138617	PLF_1573_00000579	PGF_00027464		140		Organic hydroperoxide resistance protein
Clavibacter michiganensis strain PF008	28447.7	CP012573	fig|28447.7.peg.327	AES38_01615		PATRIC.28447.7.CP012573.CDS.323829.324236.fwd	PATRIC	CDS	323829	324236	408	+	FIG00512038	PLF_1573_00001045	PGF_00408655		135		putative membrane protein
Clavibacter michiganensis strain PF008	28447.7	CP012573	fig|28447.7.peg.328	AES38_01620		PATRIC.28447.7.CP012573.CDS.324333.324545.fwd	PATRIC	CDS	324333	324545	213	+		PLF_1573_00002737	PGF_00283822		70		hypothetical protein
Clavibacter michiganensis strain PF008	28447.7	CP012573	fig|28447.7.peg.329	AES38_01625		PATRIC.28447.7.CP012573.CDS.324636.325040.fwd	PATRIC	CDS	324636	325040	405	+	FIG00007915	PLF_1573_00001198	PGF_00010021		134		Glyoxalase family protein
Clavibacter michiganensis strain PF008	28447.7	CP012573	fig|28447.7.peg.330	AES38_01630		PATRIC.28447.7.CP012573.CDS.325051.326181.rev	PATRIC	CDS	325051	326181	1131	-	FIG00665078	PLF_1573_00002321	PGF_00424643		376		Epoxide hydrolase 1 (EC 3.3.2.9)
Clavibacter michiganensis strain PF008	28447.7	CP012573	fig|28447.7.peg.331	AES38_01635		PATRIC.28447.7.CP012573.CDS.326178.327134.rev	PATRIC	CDS	326178	327134	957	-	FIG01122687		PGF_00039477		318		Putative MerR-family transcriptional regulator
Clavibacter michiganensis strain PF008	28447.7	CP012573	fig|28447.7.peg.332	AES38_01640		PATRIC.28447.7.CP012573.CDS.327346.328302.fwd	PATRIC	CDS	327346	328302	957	+	FIG01040152	PLF_1573_00002351	PGF_00019222		318		Manganese catalase (EC 1.11.1.6)
Clavibacter michiganensis strain PF008	28447.7	CP012573	fig|28447.7.peg.333	AES38_01645		PATRIC.28447.7.CP012573.CDS.328381.329217.rev	PATRIC	CDS	328381	329217	837	-		PLF_1573_00003153	PGF_01251816		278		Triacylglycerol lipase precursor (EC 3.1.1.3)
Clavibacter michiganensis strain PF008	28447.7	CP012573	fig|28447.7.peg.334	AES38_01650		PATRIC.28447.7.CP012573.CDS.329446.331884.fwd	PATRIC	CDS	329446	331884	2439	+	FIG00137542	PLF_1573_00000838	PGF_00067129		812		Xylulose-5-phosphate phosphoketolase (EC 4.1.2.9) @ Fructose-6-phosphate phosphoketolase (EC 4.1.2.22)
Clavibacter michiganensis strain PF008	28447.7	CP012573	fig|28447.7.peg.335			PATRIC.28447.7.CP012573.CDS.331891.333573.rev	PATRIC	CDS	331891	333573	1683	-	FIG00638284	PLF_1573_00002622	PGF_01251560		560		hypothetical protein
Clavibacter michiganensis strain PF008	28447.7	CP012573	fig|28447.7.peg.336	AES38_01660		PATRIC.28447.7.CP012573.CDS.333785.334447.fwd	PATRIC	CDS	333785	334447	663	+	FIG00638284	PLF_1573_00000993	PGF_01253424		220		hypothetical protein
Clavibacter michiganensis strain PF008	28447.7	CP012573	fig|28447.7.peg.337	AES38_01665		PATRIC.28447.7.CP012573.CDS.334464.334982.rev	PATRIC	CDS	334464	334982	519	-	FIG00001650	PLF_1573_00002392	PGF_00012105		172		Histone acetyltransferase HPA2 and related acetyltransferases
Clavibacter michiganensis strain PF008	28447.7	CP012573	fig|28447.7.peg.338	AES38_01670		PATRIC.28447.7.CP012573.CDS.335015.335797.rev	PATRIC	CDS	335015	335797	783	-	FIG00940200	PLF_1573_00001195	PGF_00048988		260		Alpha/beta superfamily hydrolase
Clavibacter michiganensis strain PF008	28447.7	CP012573	fig|28447.7.peg.339	AES38_01675		PATRIC.28447.7.CP012573.CDS.335797.336327.rev	PATRIC	CDS	335797	336327	531	-	FIG00023936	PLF_1573_00002448	PGF_00033019		176		Phenolic acid decarboxylase (EC 4.1.1.-)
Clavibacter michiganensis strain PF008	28447.7	CP012573	fig|28447.7.peg.340	AES38_01680		PATRIC.28447.7.CP012573.CDS.336391.336942.fwd	PATRIC	CDS	336391	336942	552	+	FIG00001650	PLF_1573_00002391	PGF_01251514		183		Histone acetyltransferase HPA2 and related acetyltransferases
Clavibacter michiganensis strain PF008	28447.7	CP012573	fig|28447.7.peg.341	AES38_01685		PATRIC.28447.7.CP012573.CDS.336960.337559.rev	PATRIC	CDS	336960	337559	600	-	FIG00944973	PLF_1573_00000789	PGF_01253319		199		Transcriptional regulator, MarR family
Clavibacter michiganensis strain PF008	28447.7	CP012573	fig|28447.7.peg.342	AES38_01690		PATRIC.28447.7.CP012573.CDS.337556.339313.rev	PATRIC	CDS	337556	339313	1758	-	FIG01120930	PLF_1573_00000537	PGF_01253286		585		Multidrug resistance protein ErmB
Clavibacter michiganensis strain PF008	28447.7	CP012573	fig|28447.7.peg.343	AES38_01695		PATRIC.28447.7.CP012573.CDS.339480.339842.fwd	PATRIC	CDS	339480	339842	363	+	FIG00511187	PLF_1573_00002266	PGF_01251490		120		Gb|AAF24581.1
Clavibacter michiganensis strain PF008	28447.7	CP012573	fig|28447.7.peg.344	AES38_01700		PATRIC.28447.7.CP012573.CDS.339856.340161.rev	PATRIC	CDS	339856	340161	306	-	FIG00512215	PLF_1573_00000911	PGF_00123340		101		FIG00512217: hypothetical protein
Clavibacter michiganensis strain PF008	28447.7	CP012573	fig|28447.7.peg.345	AES38_01705		PATRIC.28447.7.CP012573.CDS.340186.340704.rev	PATRIC	CDS	340186	340704	519	-	FIG00511999	PLF_1573_00000085	PGF_01253331		172		FIG00512001: hypothetical protein
Clavibacter michiganensis strain PF008	28447.7	CP012573	fig|28447.7.peg.346	AES38_01710		PATRIC.28447.7.CP012573.CDS.340710.341612.rev	PATRIC	CDS	340710	341612	903	-	FIG00511713	PLF_1573_00002061	PGF_01251393		300		FIG00511715: hypothetical protein
Clavibacter michiganensis strain PF008	28447.7	CP012573	fig|28447.7.peg.347	AES38_01715		PATRIC.28447.7.CP012573.CDS.341703.342332.rev	PATRIC	CDS	341703	342332	630	-	FIG00511759	PLF_1573_00001584	PGF_01251312		209		NADP-dependent L-serine/L-allo-threonine dehydrogenase ydfG (EC 1.1.1.-)
Clavibacter michiganensis strain PF008	28447.7	CP012573	fig|28447.7.peg.348	AES38_01720		PATRIC.28447.7.CP012573.CDS.342329.343750.rev	PATRIC	CDS	342329	343750	1422	-	FIG00511116	PLF_1573_00002060	PGF_00251055		473		FIG00511119: hypothetical protein
Clavibacter michiganensis strain PF008	28447.7	CP012573	fig|28447.7.peg.349	AES38_01725		PATRIC.28447.7.CP012573.CDS.343888.344460.rev	PATRIC	CDS	343888	344460	573	-	FIG01315364	PLF_1573_00001105	PGF_00028083		190		Acetyltransferase, GNAT family
Clavibacter michiganensis strain PF008	28447.7	CP012573	fig|28447.7.peg.350	AES38_01730		PATRIC.28447.7.CP012573.CDS.344569.345786.fwd	PATRIC	CDS	344569	345786	1218	+	FIG00009601	PLF_1573_00000639	PGF_00037172		405		Probable low-affinity inorganic phosphate transporter
Clavibacter michiganensis strain PF008	28447.7	CP012573	fig|28447.7.peg.351	AES38_01735		PATRIC.28447.7.CP012573.CDS.345798.346109.fwd	PATRIC	CDS	345798	346109	312	+	FIG00511131	PLF_1573_00002132	PGF_01251436		103		FIG00511132: hypothetical protein
Clavibacter michiganensis strain PF008	28447.7	CP012573	fig|28447.7.peg.352	AES38_01740		PATRIC.28447.7.CP012573.CDS.346112.346822.fwd	PATRIC	CDS	346112	346822	711	+	FIG00511750	PLF_1573_00002592	PGF_00373880		236		FIG00511754: hypothetical protein
Clavibacter michiganensis strain PF008	28447.7	CP012573	fig|28447.7.peg.353	AES38_01745		PATRIC.28447.7.CP012573.CDS.346888.347724.fwd	PATRIC	CDS	346888	347724	837	+	FIG00133285	PLF_1573_00003021	PGF_01251714		278		Beta-ketoadipate enol-lactone hydrolase (EC 3.1.1.24)
Clavibacter michiganensis strain PF008	28447.7	CP012573	fig|28447.7.peg.354	AES38_01750		PATRIC.28447.7.CP012573.CDS.347717.348286.fwd	PATRIC	CDS	347717	348286	570	+	FIG00554417	PLF_1573_00003579	PGF_00058904		189		Transcriptional regulator, AcrR family
Clavibacter michiganensis strain PF008	28447.7	CP012573	fig|28447.7.peg.355	AES38_01755		PATRIC.28447.7.CP012573.CDS.348348.349022.fwd	PATRIC	CDS	348348	349022	675	+	FIG01580996	PLF_1573_00002373	PGF_01251509		224		HTH-type transcriptional regulator tcmR (Tetracenomycin C transcriptional repressor)
Clavibacter michiganensis strain PF008	28447.7	CP012573	fig|28447.7.peg.356	AES38_01760		PATRIC.28447.7.CP012573.CDS.349019.350719.fwd	PATRIC	CDS	349019	350719	1701	+	FIG00613966	PLF_1573_00000536	PGF_00023197		566		Multidrug resistance protein ErmB
Clavibacter michiganensis strain PF008	28447.7	CP012573	fig|28447.7.peg.357	AES38_01765		PATRIC.28447.7.CP012573.CDS.350864.351307.fwd	PATRIC	CDS	350864	351307	444	+	FIG01339319	PLF_1573_00000638	PGF_00037109		147		Probable glutathione S-transferase-related transmembrane protein (EC 2.5.1.18)
Clavibacter michiganensis strain PF008	28447.7	CP012573	fig|28447.7.peg.358	AES38_01770		PATRIC.28447.7.CP012573.CDS.351304.352959.rev	PATRIC	CDS	351304	352959	1656	-	FIG00638284	PLF_1573_00000910	PGF_00251055		551		hypothetical protein
Clavibacter michiganensis strain PF008	28447.7	CP012573	fig|28447.7.peg.359	AES38_01775		PATRIC.28447.7.CP012573.CDS.353155.354084.fwd	PATRIC	CDS	353155	354084	930	+	FIG00537439	PLF_1573_00002221	PGF_00409438		309		putative membrane protein
Clavibacter michiganensis strain PF008	28447.7	CP012573	fig|28447.7.peg.360			PATRIC.28447.7.CP012573.CDS.354081.354239.rev	PATRIC	CDS	354081	354239	159	-	FIG00638284	PLF_1573_00002059	PGF_01251392		52		hypothetical protein
Clavibacter michiganensis strain PF008	28447.7	CP012573	fig|28447.7.peg.361	AES38_01780		PATRIC.28447.7.CP012573.CDS.354361.355323.rev	PATRIC	CDS	354361	355323	963	-	FIG01473707	PLF_1573_00000683	PGF_00043431		320		Putative reductase
Clavibacter michiganensis strain PF008	28447.7	CP012573	fig|28447.7.peg.362	AES38_01785		PATRIC.28447.7.CP012573.CDS.355408.355623.fwd	PATRIC	CDS	355408	355623	216	+					71		hypothetical protein
Clavibacter michiganensis strain PF008	28447.7	CP012573	fig|28447.7.peg.363	AES38_01790		PATRIC.28447.7.CP012573.CDS.355620.356024.fwd	PATRIC	CDS	355620	356024	405	+					134		hypothetical protein
Clavibacter michiganensis strain PF008	28447.7	CP012573	fig|28447.7.peg.364			PATRIC.28447.7.CP012573.CDS.355990.356259.fwd	PATRIC	CDS	355990	356259	270	+		PLF_1573_00001399	PGF_00420111		89		Cytidine deaminase (EC 3.5.4.5)
Clavibacter michiganensis strain PF008	28447.7	CP012573	fig|28447.7.peg.365			PATRIC.28447.7.CP012573.CDS.356453.356692.rev	PATRIC	CDS	356453	356692	240	-	FIG00512481	PLF_1573_00000909	PGF_01253370		79		FIG00512484: hypothetical protein
Clavibacter michiganensis strain PF008	28447.7	CP012573	fig|28447.7.peg.366	AES38_01805		PATRIC.28447.7.CP012573.CDS.357166.358047.rev	PATRIC	CDS	357166	358047	882	-	FIG00512472	PLF_1573_00001413	PGF_00421250		293		DNA for SgaA, complete cds
Clavibacter michiganensis strain PF008	28447.7	CP012573	fig|28447.7.peg.367	AES38_01810		PATRIC.28447.7.CP012573.CDS.358096.358512.rev	PATRIC	CDS	358096	358512	417	-	FIG00511587	PLF_1573_00002591	PGF_00085939		138		FIG00511588: hypothetical protein
Clavibacter michiganensis strain PF008	28447.7	CP012573	fig|28447.7.peg.368	AES38_01815		PATRIC.28447.7.CP012573.CDS.358634.359542.fwd	PATRIC	CDS	358634	359542	909	+		PLF_1573_00001617	PGF_00028556		302		Oxidoreductase
Clavibacter michiganensis strain PF008	28447.7	CP012573	fig|28447.7.peg.369	AES38_01820		PATRIC.28447.7.CP012573.CDS.359583.360230.rev	PATRIC	CDS	359583	360230	648	-	FIG00511154	PLF_1573_00000908	PGF_00325815		215		FIG00511158: hypothetical protein
Clavibacter michiganensis strain PF008	28447.7	CP012573	fig|28447.7.peg.370	AES38_01825		PATRIC.28447.7.CP012573.CDS.360304.361962.fwd	PATRIC	CDS	360304	361962	1659	+	FIG00073301	PLF_1573_00001922	PGF_01251342		552		Two-component sensor kinase yycG (EC 2.7.3.-)
Clavibacter michiganensis strain PF008	28447.7	CP012573	fig|28447.7.peg.371			PATRIC.28447.7.CP012573.CDS.361995.362123.rev	PATRIC	CDS	361995	362123	129	-					42		hypothetical protein
Clavibacter michiganensis strain PF008	28447.7	CP012573	fig|28447.7.peg.372			PATRIC.28447.7.CP012573.CDS.362243.362992.fwd	PATRIC	CDS	362243	362992	750	+	FIG00511212	PLF_1573_00000229	PGF_01251500		249		Basic proline-rich protein precursor
Clavibacter michiganensis strain PF008	28447.7	CP012573	fig|28447.7.peg.373	AES38_01835		PATRIC.28447.7.CP012573.CDS.363105.363980.rev	PATRIC	CDS	363105	363980	876	-	FIG01124340	PLF_1573_00001924	PGF_00062831		291		Two-component system response regulator
Clavibacter michiganensis strain PF008	28447.7	CP012573	fig|28447.7.peg.374	AES38_01840		PATRIC.28447.7.CP012573.CDS.364112.364654.rev	PATRIC	CDS	364112	364654	543	-		PLF_1573_00000907	PGF_01253369		180		hypothetical protein
Clavibacter michiganensis strain PF008	28447.7	CP012573	fig|28447.7.peg.375	AES38_01845		PATRIC.28447.7.CP012573.CDS.364735.365571.rev	PATRIC	CDS	364735	365571	837	-	FIG00000065	PLF_1573_00001184	PGF_00425012		278		Exodeoxyribonuclease III (EC 3.1.11.2)
Clavibacter michiganensis strain PF008	28447.7	CP012573	fig|28447.7.peg.376	AES38_01850		PATRIC.28447.7.CP012573.CDS.365603.366001.rev	PATRIC	CDS	365603	366001	399	-	FIG00511913	PLF_1573_00002131	PGF_00251055		132		FIG00511916: hypothetical protein
Clavibacter michiganensis strain PF008	28447.7	CP012573	fig|28447.7.peg.377	AES38_01855		PATRIC.28447.7.CP012573.CDS.365985.366608.rev	PATRIC	CDS	365985	366608	624	-	FIG00511484	PLF_1573_00001264	PGF_01251290		207		Large tegument protein
Clavibacter michiganensis strain PF008	28447.7	CP012573	fig|28447.7.peg.378	AES38_01860		PATRIC.28447.7.CP012573.CDS.366605.367159.rev	PATRIC	CDS	366605	367159	555	-		PLF_1573_00002489	PGF_00046286		184		RNA polymerase sigma factor
Clavibacter michiganensis strain PF008	28447.7	CP012573	fig|28447.7.peg.379	AES38_01865		PATRIC.28447.7.CP012573.CDS.367293.367775.fwd	PATRIC	CDS	367293	367775	483	+	FIG00638284	PLF_1573_00002058	PGF_00251648		160		hypothetical protein
Clavibacter michiganensis strain PF008	28447.7	CP012573	fig|28447.7.peg.380	AES38_01870		PATRIC.28447.7.CP012573.CDS.367921.368856.fwd	PATRIC	CDS	367921	368856	936	+	FIG00133229	PLF_1573_00002057	PGF_00231644		311		2-hydroxy-3-oxopropionate reductase (EC 1.1.1.60)
Clavibacter michiganensis strain PF008	28447.7	CP012573	fig|28447.7.peg.381	AES38_01875		PATRIC.28447.7.CP012573.CDS.368923.369477.fwd	PATRIC	CDS	368923	369477	555	+	FIG00025759	PLF_1573_00001612	PGF_00027545		184		Orotate phosphoribosyltransferase (EC 2.4.2.10)
Clavibacter michiganensis strain PF008	28447.7	CP012573	fig|28447.7.peg.382			PATRIC.28447.7.CP012573.CDS.369435.370763.rev	PATRIC	CDS	369435	370763	1329	-	FIG00638284		PGF_00251055		442		hypothetical protein
Clavibacter michiganensis strain PF008	28447.7	CP012573	fig|28447.7.peg.383			PATRIC.28447.7.CP012573.CDS.371072.371686.fwd	PATRIC	CDS	371072	371686	615	+	FIG01217533	PLF_1573_00001072	PGF_01251272		204		very large tegument protein
Clavibacter michiganensis strain PF008	28447.7	CP012573	fig|28447.7.peg.384	AES38_01885		PATRIC.28447.7.CP012573.CDS.371715.372512.rev	PATRIC	CDS	371715	372512	798	-	FIG01423642	PLF_1573_00001435	PGF_00013022		265		Hypothetical NagD-like phosphatase, Actinobacterial subfamily
Clavibacter michiganensis strain PF008	28447.7	CP012573	fig|28447.7.peg.385	AES38_01890		PATRIC.28447.7.CP012573.CDS.372642.373547.fwd	PATRIC	CDS	372642	373547	906	+	FIG00001540	PLF_1573_00001102	PGF_00416292		301		3',5'-cyclic-nucleotide phosphodiesterase (EC 3.1.4.17)
Clavibacter michiganensis strain PF008	28447.7	CP012573	fig|28447.7.peg.386	AES38_01895		PATRIC.28447.7.CP012573.CDS.373637.373807.rev	PATRIC	CDS	373637	373807	171	-	FIG00638284	PLF_1573_00001005	PGF_00175099		56		hypothetical protein
Clavibacter michiganensis strain PF008	28447.7	CP012573	fig|28447.7.peg.387	AES38_01900		PATRIC.28447.7.CP012573.CDS.373991.374410.fwd	PATRIC	CDS	373991	374410	420	+	FIG00933666	PLF_1573_00001294	PGF_00019706		139		Membrane protein
Clavibacter michiganensis strain PF008	28447.7	CP012573	fig|28447.7.peg.388	AES38_01905		PATRIC.28447.7.CP012573.CDS.374498.376672.fwd	PATRIC	CDS	374498	376672	2175	+	FIG00000422	PLF_1573_00001500	PGF_00016645		724		ATP-dependent DNA helicase RecQ
Clavibacter michiganensis strain PF008	28447.7	CP012573	fig|28447.7.peg.389			PATRIC.28447.7.CP012573.CDS.376689.377834.rev	PATRIC	CDS	376689	377834	1146	-	FIG00733802	PLF_1573_00001416	PGF_01251302		381		DNA modification methyltransferase (EC 2.1.1.-)
Clavibacter michiganensis strain PF008	28447.7	CP012573	fig|28447.7.peg.390			PATRIC.28447.7.CP012573.CDS.378572.379327.fwd	PATRIC	CDS	378572	379327	756	+	FIG00638284	PLF_1573_00002147	PGF_01251443		251		hypothetical protein
Clavibacter michiganensis strain PF008	28447.7	CP012573	fig|28447.7.peg.391	AES38_01920		PATRIC.28447.7.CP012573.CDS.379363.380148.fwd	PATRIC	CDS	379363	380148	786	+			PGF_00500276		261		hypothetical protein
Clavibacter michiganensis strain PF008	28447.7	CP012573	fig|28447.7.peg.392	AES38_01925		PATRIC.28447.7.CP012573.CDS.380211.381461.fwd	PATRIC	CDS	380211	381461	1251	+	FIG00001585	PLF_1573_00001241	PGF_01251288		416		Kynureninase (EC 3.7.1.3) homolog
Clavibacter michiganensis strain PF008	28447.7	CP012573	fig|28447.7.peg.393	AES38_01930		PATRIC.28447.7.CP012573.CDS.381483.382277.rev	PATRIC	CDS	381483	382277	795	-	FIG00546160	PLF_1573_00003642	PGF_00333493		264		Short-chain dehydrogenase/reductase SDR
Clavibacter michiganensis strain PF008	28447.7	CP012573	fig|28447.7.peg.394	AES38_01935		PATRIC.28447.7.CP012573.CDS.382314.383408.rev	PATRIC	CDS	382314	383408	1095	-	FIG01324066	PLF_1573_00000634	PGF_00035802		364		Predicted dehydrogenases and related proteins
Clavibacter michiganensis strain PF008	28447.7	CP012573	fig|28447.7.peg.395	AES38_01940		PATRIC.28447.7.CP012573.CDS.383608.385848.fwd	PATRIC	CDS	383608	385848	2241	+	FIG00512285	PLF_1573_00000754	PGF_01253315		746		Sucrose phosphate synthase
Clavibacter michiganensis strain PF008	28447.7	CP012573	fig|28447.7.peg.396	AES38_01945		PATRIC.28447.7.CP012573.CDS.385845.387170.fwd	PATRIC	CDS	385845	387170	1326	+	FIG00512018	PLF_1573_00000839	PGF_01253326		441		Zeaxanthin glucosyl transferase
Clavibacter michiganensis strain PF008	28447.7	CP012573	fig|28447.7.peg.397			PATRIC.28447.7.CP012573.CDS.387279.387452.fwd	PATRIC	CDS	387279	387452	174	+	FIG00512424	PLF_1573_00002181	PGF_01251464		57		FIG00512426: hypothetical protein
Clavibacter michiganensis strain PF008	28447.7	CP012573	fig|28447.7.peg.398	AES38_01950		PATRIC.28447.7.CP012573.CDS.387521.389215.fwd	PATRIC	CDS	387521	389215	1695	+	FIG00537781	PLF_1573_00001692	PGF_00038061		564		Protein containing domains DUF404, DUF407
Clavibacter michiganensis strain PF008	28447.7	CP012573	fig|28447.7.peg.399	AES38_01955		PATRIC.28447.7.CP012573.CDS.389215.390150.fwd	PATRIC	CDS	389215	390150	936	+	FIG00537369	PLF_1573_00000649	PGF_00038060		311		Protein containing domains DUF403
Clavibacter michiganensis strain PF008	28447.7	CP012573	fig|28447.7.peg.400	AES38_01960		PATRIC.28447.7.CP012573.CDS.390147.390992.fwd	PATRIC	CDS	390147	390992	846	+	FIG00453060	PLF_1573_00001693	PGF_00038073		281		Protein containing transglutaminase-like domain, putative cysteine protease
Clavibacter michiganensis strain PF008	28447.7	CP012573	fig|28447.7.peg.401	AES38_01965		PATRIC.28447.7.CP012573.CDS.391049.391939.fwd	PATRIC	CDS	391049	391939	891	+	FIG00001043	PLF_1573_00001275	PGF_00018041		296		Lysophospholipase (EC 3.1.1.5); Monoglyceride lipase (EC 3.1.1.23)
Clavibacter michiganensis strain PF008	28447.7	CP012573	fig|28447.7.peg.402			PATRIC.28447.7.CP012573.CDS.391936.392244.fwd	PATRIC	CDS	391936	392244	309	+	FIG00001650	PLF_1573_00000413	PGF_00012064		102		Histone acetyltransferase HPA2 and related acetyltransferases
Clavibacter michiganensis strain PF008	28447.7	CP012573	fig|28447.7.peg.403	AES38_01975		PATRIC.28447.7.CP012573.CDS.392308.395127.rev	PATRIC	CDS	392308	395127	2820	-	FIG00638284	PLF_1573_00000008	PGF_00251055		939		hypothetical protein
Clavibacter michiganensis strain PF008	28447.7	CP012573	fig|28447.7.peg.404	AES38_01980		PATRIC.28447.7.CP012573.CDS.395124.397139.rev	PATRIC	CDS	395124	397139	2016	-	FIG00511646	PLF_1573_00000989	PGF_00210615		671		FIG00511649: hypothetical protein
Clavibacter michiganensis strain PF008	28447.7	CP012573	fig|28447.7.peg.405	AES38_01985		PATRIC.28447.7.CP012573.CDS.397373.398107.fwd	PATRIC	CDS	397373	398107	735	+	FIG00628138	PLF_1573_00001860	PGF_00057691		244		Transcriptional regulator
Clavibacter michiganensis strain PF008	28447.7	CP012573	fig|28447.7.peg.406	AES38_01990		PATRIC.28447.7.CP012573.CDS.398181.400352.rev	PATRIC	CDS	398181	400352	2172	-	FIG00442324	PLF_1573_00000059	PGF_00026213		723		Non-hemolytic phospholipase C precursor (EC 3.1.4.3) (PLC-N) (Phosphatidylcholine cholinephosphohydrolase) (Phosphatidylcholine-hydrolyzing phospholipase C) (PC-PLC)
Clavibacter michiganensis strain PF008	28447.7	CP012573	fig|28447.7.peg.407			PATRIC.28447.7.CP012573.CDS.400354.400581.fwd	PATRIC	CDS	400354	400581	228	+		PLF_1573_00004625	PGF_01252840		75		hypothetical protein
Clavibacter michiganensis strain PF008	28447.7	CP012573	fig|28447.7.peg.408	AES38_01995		PATRIC.28447.7.CP012573.CDS.400626.401258.rev	PATRIC	CDS	400626	401258	633	-	FIG00001574	PLF_1573_00000159	PGF_00042162		210		Alkylated DNA repair protein
Clavibacter michiganensis strain PF008	28447.7	CP012573	fig|28447.7.peg.409	AES38_02000		PATRIC.28447.7.CP012573.CDS.401322.402002.rev	PATRIC	CDS	401322	402002	681	-		PLF_1573_00000906	PGF_00185478		226		membrane protein, putative
Clavibacter michiganensis strain PF008	28447.7	CP012573	fig|28447.7.peg.410	AES38_02005		PATRIC.28447.7.CP012573.CDS.402081.403130.fwd	PATRIC	CDS	402081	403130	1050	+	FIG00000465	PLF_1573_00001270	PGF_00017127		349		Lipoate-protein ligase A
Clavibacter michiganensis strain PF008	28447.7	CP012573	fig|28447.7.peg.411	AES38_02010		PATRIC.28447.7.CP012573.CDS.403385.403669.rev	PATRIC	CDS	403385	403669	285	-	FIG00638284	PLF_1573_00002185	PGF_01251466		94		hypothetical protein
Clavibacter michiganensis strain PF008	28447.7	CP012573	fig|28447.7.peg.412	AES38_02015		PATRIC.28447.7.CP012573.CDS.403779.404666.fwd	PATRIC	CDS	403779	404666	888	+	FIG00511241	PLF_1573_00002056	PGF_01251391		295		FIG00511242: hypothetical protein
Clavibacter michiganensis strain PF008	28447.7	CP012573	fig|28447.7.peg.413	AES38_02020		PATRIC.28447.7.CP012573.CDS.404663.405142.rev	PATRIC	CDS	404663	405142	480	-	FIG00511556	PLF_1573_00000905	PGF_01253368		159		FIG00511557: hypothetical protein
Clavibacter michiganensis strain PF008	28447.7	CP012573	fig|28447.7.peg.414	AES38_02025		PATRIC.28447.7.CP012573.CDS.405228.406868.rev	PATRIC	CDS	405228	406868	1641	-	FIG00000901	PLF_1573_00001652	PGF_00033479		546		Phosphoglucomutase (EC 5.4.2.2)
Clavibacter michiganensis strain PF008	28447.7	CP012573	fig|28447.7.peg.415	AES38_02030		PATRIC.28447.7.CP012573.CDS.406918.407880.fwd	PATRIC	CDS	406918	407880	963	+	FIG00341289	PLF_1573_00001679	PGF_00036559		320		Prephenate dehydratase (EC 4.2.1.51)
Clavibacter michiganensis strain PF008	28447.7	CP012573	fig|28447.7.peg.416	AES38_02035		PATRIC.28447.7.CP012573.CDS.407891.409258.rev	PATRIC	CDS	407891	409258	1368	-	FIG00745843	PLF_1573_00002848	PGF_00052619		455		Amino acid transporter
Clavibacter michiganensis strain PF008	28447.7	CP012573	fig|28447.7.peg.417	AES38_02040		PATRIC.28447.7.CP012573.CDS.409399.410679.fwd	PATRIC	CDS	409399	410679	1281	+	FIG00000121	PLF_1573_00002503	PGF_00051525		426		Seryl-tRNA synthetase (EC 6.1.1.11)
Clavibacter michiganensis strain PF008	28447.7	CP012573	fig|28447.7.peg.418	AES38_02045		PATRIC.28447.7.CP012573.CDS.410676.411497.fwd	PATRIC	CDS	410676	411497	822	+	FIG01323344	PLF_1573_00001430	PGF_00012573		273		Hydrolase
Clavibacter michiganensis strain PF008	28447.7	CP012573	fig|28447.7.peg.419	AES38_02050		PATRIC.28447.7.CP012573.CDS.411517.412581.fwd	PATRIC	CDS	411517	412581	1065	+	FIG00638284		PGF_00251055		354		Alcohol dehydrogenase (EC 1.1.1.1)
Clavibacter michiganensis strain PF008	28447.7	CP012573	fig|28447.7.peg.420	AES38_02060		PATRIC.28447.7.CP012573.CDS.412879.414147.fwd	PATRIC	CDS	412879	414147	1269	+	FIG00025213	PLF_1573_00001523	PGF_00417149		422		Cell envelope-associated transcriptional attenuator LytR-CpsA-Psr, subfamily A1 (as in PMID19099556)
Clavibacter michiganensis strain PF008	28447.7	CP012573	fig|28447.7.peg.421			PATRIC.28447.7.CP012573.CDS.414263.414376.fwd	PATRIC	CDS	414263	414376	114	+					37		hypothetical protein
Clavibacter michiganensis strain PF008	28447.7	CP012573	fig|28447.7.peg.422	AES38_02070		PATRIC.28447.7.CP012573.CDS.414762.415832.fwd	PATRIC	CDS	414762	415832	1071	+	FIG00781023	PLF_1573_00001882	PGF_00059365		356		Transcriptional regulator, LacI family
Clavibacter michiganensis strain PF008	28447.7	CP012573	fig|28447.7.peg.423	AES38_02075		PATRIC.28447.7.CP012573.CDS.416004.416702.fwd	PATRIC	CDS	416004	416702	699	+	FIG00446320	PLF_1573_00001556	PGF_00021544		232		Mll2313 protein
Clavibacter michiganensis strain PF008	28447.7	CP012573	fig|28447.7.peg.424	AES38_02080		PATRIC.28447.7.CP012573.CDS.416687.417796.fwd	PATRIC	CDS	416687	417796	1110	+	FIG01323940	PLF_1573_00001227	PGF_00422800		369		Dehydrogenase
Clavibacter michiganensis strain PF008	28447.7	CP012573	fig|28447.7.peg.425	AES38_02085		PATRIC.28447.7.CP012573.CDS.417888.418244.fwd	PATRIC	CDS	417888	418244	357	+	FIG00512662	PLF_1573_00000904	PGF_01253367		118		FIG00512663: hypothetical protein
Clavibacter michiganensis strain PF008	28447.7	CP012573	fig|28447.7.peg.426	AES38_02090		PATRIC.28447.7.CP012573.CDS.418274.419614.rev	PATRIC	CDS	418274	419614	1341	-	FIG00066643	PLF_1573_00002436	PGF_00025430		446		Neopullulanase (EC 3.2.1.135)
Clavibacter michiganensis strain PF008	28447.7	CP012573	fig|28447.7.peg.427			PATRIC.28447.7.CP012573.CDS.419979.420251.rev	PATRIC	CDS	419979	420251	273	-	FIG01124340	PLF_1573_00001886	PGF_01251337		90		Transcriptional regulator, LuxR family
Clavibacter michiganensis strain PF008	28447.7	CP012573	fig|28447.7.peg.428	AES38_02105		PATRIC.28447.7.CP012573.CDS.420248.421339.rev	PATRIC	CDS	420248	421339	1092	-	FIG00511679	PLF_1573_00001689	PGF_01251315		363		Proline-rich protein
Clavibacter michiganensis strain PF008	28447.7	CP012573	fig|28447.7.peg.429	AES38_02110		PATRIC.28447.7.CP012573.CDS.421336.421746.rev	PATRIC	CDS	421336	421746	411	-	FIG00002474	PLF_1573_00001897	PGF_00059746		136		Transcriptional regulator, PadR family
Clavibacter michiganensis strain PF008	28447.7	CP012573	fig|28447.7.peg.430	AES38_02115		PATRIC.28447.7.CP012573.CDS.421900.422220.fwd	PATRIC	CDS	421900	422220	321	+	FIG00638284	PLF_1573_00000903	PGF_01253366		106		hypothetical protein
Clavibacter michiganensis strain PF008	28447.7	CP012573	fig|28447.7.peg.431	AES38_02120		PATRIC.28447.7.CP012573.CDS.422324.423091.fwd	PATRIC	CDS	422324	423091	768	+	FIG00511985	PLF_1573_00000305	PGF_00019628		255		Membrane protein
Clavibacter michiganensis strain PF008	28447.7	CP012573	fig|28447.7.peg.432	AES38_02125		PATRIC.28447.7.CP012573.CDS.423156.424064.fwd	PATRIC	CDS	423156	424064	909	+	FIG01325830	PLF_1573_00000636	PGF_00036098		302		Predicted metal-dependent hydrolase
Clavibacter michiganensis strain PF008	28447.7	CP012573	fig|28447.7.peg.433	AES38_02130		PATRIC.28447.7.CP012573.CDS.424189.424719.fwd	PATRIC	CDS	424189	424719	531	+	FIG00512616	PLF_1573_00002055	PGF_01251390		176		FIG00512617: hypothetical protein
Clavibacter michiganensis strain PF008	28447.7	CP012573	fig|28447.7.peg.434	AES38_02135		PATRIC.28447.7.CP012573.CDS.424737.425771.fwd	PATRIC	CDS	424737	425771	1035	+	FIG01321859	PLF_1573_00001616	PGF_00028638		344		Oxidoreductase
Clavibacter michiganensis strain PF008	28447.7	CP012573	fig|28447.7.peg.435	AES38_02140		PATRIC.28447.7.CP012573.CDS.425856.426629.fwd	PATRIC	CDS	425856	426629	774	+	FIG00005243	PLF_1573_00001467	PGF_00033589		257		Acyl-CoA:1-acyl-sn-glycerol-3-phosphate acyltransferase (EC 2.3.1.51)
Clavibacter michiganensis strain PF008	28447.7	CP012573	fig|28447.7.peg.436	AES38_02145		PATRIC.28447.7.CP012573.CDS.426916.427332.rev	PATRIC	CDS	426916	427332	417	-	FIG00008304	PLF_1573_00000480	PGF_00066589		138		Aspartate 1-decarboxylase (EC 4.1.1.11)
Clavibacter michiganensis strain PF008	28447.7	CP012573	fig|28447.7.peg.437	AES38_02150		PATRIC.28447.7.CP012573.CDS.427568.428647.fwd	PATRIC	CDS	427568	428647	1080	+	FIG00136522	PLF_1573_00001447	PGF_00014185		359		Inner membrane protein YihY, formerly thought to be RNase BN
Clavibacter michiganensis strain PF008	28447.7	CP012573	fig|28447.7.peg.438	AES38_02155		PATRIC.28447.7.CP012573.CDS.428705.430228.rev	PATRIC	CDS	428705	430228	1524	-	FIG00000633	PLF_1573_00000249	PGF_00422942		507		Deoxyribodipyrimidine photolyase (EC 4.1.99.3)
Clavibacter michiganensis strain PF008	28447.7	CP012573	fig|28447.7.peg.439	AES38_02160		PATRIC.28447.7.CP012573.CDS.430375.431772.fwd	PATRIC	CDS	430375	431772	1398	+	FIG00512346	PLF_1573_00000902	PGF_01253365		465		FIG00512347: hypothetical protein
Clavibacter michiganensis strain PF008	28447.7	CP012573	fig|28447.7.peg.440	AES38_02165		PATRIC.28447.7.CP012573.CDS.431769.432212.rev	PATRIC	CDS	431769	432212	444	-	FIG00554610	PLF_1573_00000788	PGF_00059570		147		Transcriptional regulator, MarR family
Clavibacter michiganensis strain PF008	28447.7	CP012573	fig|28447.7.peg.441	AES38_02170		PATRIC.28447.7.CP012573.CDS.432545.433309.rev	PATRIC	CDS	432545	433309	765	-	FIG01318494	PLF_1573_00001859	PGF_00058210		254		Transcriptional regulator
Clavibacter michiganensis strain PF008	28447.7	CP012573	fig|28447.7.peg.442	AES38_02175		PATRIC.28447.7.CP012573.CDS.433700.434347.rev	PATRIC	CDS	433700	434347	648	-	FIG01955791	PLF_1573_00000832	PGF_00066123		215		Uracil phosphoribosyltransferase (EC 2.4.2.9)
Clavibacter michiganensis strain PF008	28447.7	CP012573	fig|28447.7.peg.443	AES38_02180		PATRIC.28447.7.CP012573.CDS.434371.434847.fwd	PATRIC	CDS	434371	434847	477	+	FIG00000291	PLF_1573_00001070	PGF_00413350		158		tRNA-specific adenosine-34 deaminase (EC 3.5.4.33)
Clavibacter michiganensis strain PF008	28447.7	CP012573	fig|28447.7.peg.444	AES38_02185		PATRIC.28447.7.CP012573.CDS.434870.435787.rev	PATRIC	CDS	434870	435787	918	-	FIG01028953	PLF_1573_00000690	PGF_00045095		305		Putative transport protein
Clavibacter michiganensis strain PF008	28447.7	CP012573	fig|28447.7.peg.445	AES38_02190		PATRIC.28447.7.CP012573.CDS.435921.436796.fwd	PATRIC	CDS	435921	436796	876	+	FIG00133325	PLF_1573_00000694	PGF_00045948		291		Pyrroline-5-carboxylate reductase (EC 1.5.1.2)
Clavibacter michiganensis strain PF008	28447.7	CP012573	fig|28447.7.peg.446	AES38_02195		PATRIC.28447.7.CP012573.CDS.436825.437493.rev	PATRIC	CDS	436825	437493	669	-		PLF_1573_00000808	PGF_00061935		222		Trk system potassium uptake protein TrkA
Clavibacter michiganensis strain PF008	28447.7	CP012573	fig|28447.7.peg.447	AES38_02200		PATRIC.28447.7.CP012573.CDS.437547.438971.rev	PATRIC	CDS	437547	438971	1425	-		PLF_1573_00002885	PGF_00035392		474		Potassium uptake protein TrkH
Clavibacter michiganensis strain PF008	28447.7	CP012573	fig|28447.7.peg.448	AES38_02205		PATRIC.28447.7.CP012573.CDS.439049.439591.fwd	PATRIC	CDS	439049	439591	543	+	FIG00003845	PLF_1573_00000781	PGF_00059012		180		Transcriptional regulator, ArsR family
Clavibacter michiganensis strain PF008	28447.7	CP012573	fig|28447.7.peg.449	AES38_02210		PATRIC.28447.7.CP012573.CDS.439714.439953.fwd	PATRIC	CDS	439714	439953	240	+	FIG01347417	PLF_1573_00001637	PGF_00031024		79		Periplasmic molybdate-binding protein/domain
Clavibacter michiganensis strain PF008	28447.7	CP012573	fig|28447.7.peg.450			PATRIC.28447.7.CP012573.CDS.440026.440124.fwd	PATRIC	CDS	440026	440124	99	+	FIG01450612	PLF_1573_00003253	PGF_00078832		32		hypothetical protein
Clavibacter michiganensis strain PF008	28447.7	CP012573	fig|28447.7.peg.451	AES38_02215		PATRIC.28447.7.CP012573.CDS.440223.440975.rev	PATRIC	CDS	440223	440975	753	-	FIG00000149	PLF_1573_00001666	PGF_00034012		250		Phosphoserine phosphatase (EC 3.1.3.3)
Clavibacter michiganensis strain PF008	28447.7	CP012573	fig|28447.7.peg.452	AES38_02220		PATRIC.28447.7.CP012573.CDS.441011.441316.fwd	PATRIC	CDS	441011	441316	306	+	FIG00816104	PLF_1573_00000706	PGF_00047157		101		Redoxin
Clavibacter michiganensis strain PF008	28447.7	CP012573	fig|28447.7.peg.453	AES38_02225		PATRIC.28447.7.CP012573.CDS.441349.441651.fwd	PATRIC	CDS	441349	441651	303	+	FIG00801226	PLF_1573_00001824	PGF_01251334		100		Stress responsive alpha-beta barrel domain protein Dabb
Clavibacter michiganensis strain PF008	28447.7	CP012573	fig|28447.7.peg.454	AES38_02230		PATRIC.28447.7.CP012573.CDS.441671.442744.fwd	PATRIC	CDS	441671	442744	1074	+	FIG00781023	PLF_1573_00002525	PGF_00059365		357		Transcriptional regulator, LacI family
Clavibacter michiganensis strain PF008	28447.7	CP012573	fig|28447.7.peg.455	AES38_02235		PATRIC.28447.7.CP012573.CDS.442861.444171.fwd	PATRIC	CDS	442861	444171	1311	+	FIG00008693	PLF_1573_00002886	PGF_00035615		436		Predicted L-rhamnose permease RhaY
Clavibacter michiganensis strain PF008	28447.7	CP012573	fig|28447.7.peg.456	AES38_02240		PATRIC.28447.7.CP012573.CDS.444168.444986.fwd	PATRIC	CDS	444168	444986	819	+	FIG00940200	PLF_1573_00002285	PGF_00048988		272		Alpha/beta superfamily hydrolase
Clavibacter michiganensis strain PF008	28447.7	CP012573	fig|28447.7.peg.457	AES38_02245		PATRIC.28447.7.CP012573.CDS.444983.446197.fwd	PATRIC	CDS	444983	446197	1215	+	FIG00638284	PLF_1573_00002590	PGF_00251055		404		hypothetical protein
Clavibacter michiganensis strain PF008	28447.7	CP012573	fig|28447.7.peg.458	AES38_02250		PATRIC.28447.7.CP012573.CDS.446246.446818.rev	PATRIC	CDS	446246	446818	573	-	FIG00638284	PLF_1573_00002220	PGF_00409560		190		putative membrane protein
Clavibacter michiganensis strain PF008	28447.7	CP012573	fig|28447.7.peg.459	AES38_02255		PATRIC.28447.7.CP012573.CDS.446898.447113.rev	PATRIC	CDS	446898	447113	216	-	FIG00638284	PLF_1573_00002054	PGF_01251389		71		hypothetical protein
Clavibacter michiganensis strain PF008	28447.7	CP012573	fig|28447.7.peg.460	AES38_02260		PATRIC.28447.7.CP012573.CDS.447178.447510.rev	PATRIC	CDS	447178	447510	333	-	FIG00638284	PLF_1573_00002053	PGF_00185766		110		hypothetical protein
Clavibacter michiganensis strain PF008	28447.7	CP012573	fig|28447.7.peg.461			PATRIC.28447.7.CP012573.CDS.447683.448225.rev	PATRIC	CDS	447683	448225	543	-	FIG00638284	PLF_1573_00002589	PGF_00185766		180		hypothetical protein
Clavibacter michiganensis strain PF008	28447.7	CP012573	fig|28447.7.peg.462	AES38_02270		PATRIC.28447.7.CP012573.CDS.448218.448505.rev	PATRIC	CDS	448218	448505	288	-	FIG00025213	PLF_1573_00002374	PGF_00417149		95		Cell envelope-associated transcriptional attenuator LytR-CpsA-Psr, subfamily A1 (as in PMID19099556)
Clavibacter michiganensis strain PF008	28447.7	CP012573	fig|28447.7.peg.463	AES38_02275		PATRIC.28447.7.CP012573.CDS.448696.450006.rev	PATRIC	CDS	448696	450006	1311	-	FIG00000656	PLF_1573_00002327	PGF_00067466		436		Aspartyl-tRNA synthetase (EC 6.1.1.12) @ Aspartyl-tRNA(Asn) synthetase (EC 6.1.1.23)
Clavibacter michiganensis strain PF008	28447.7	CP012573	fig|28447.7.peg.464	AES38_02280		PATRIC.28447.7.CP012573.CDS.450120.450944.fwd	PATRIC	CDS	450120	450944	825	+	FIG00003076	PLF_1573_00001262	PGF_00016495		274		Lactam utilization protein LamB
Clavibacter michiganensis strain PF008	28447.7	CP012573	fig|28447.7.peg.465	AES38_02285		PATRIC.28447.7.CP012573.CDS.450941.451561.fwd	PATRIC	CDS	450941	451561	621	+	FIG00000847	PLF_1573_00001472	PGF_00044272		206		Allophanate hydrolase 2 subunit 1 (EC 3.5.1.54)
Clavibacter michiganensis strain PF008	28447.7	CP012573	fig|28447.7.peg.466	AES38_02290		PATRIC.28447.7.CP012573.CDS.451558.452475.fwd	PATRIC	CDS	451558	452475	918	+	FIG00010262	PLF_1573_00000475	PGF_00044332		305		Allophanate hydrolase 2 subunit 2 (EC 3.5.1.54)
Clavibacter michiganensis strain PF008	28447.7	CP012573	fig|28447.7.peg.467	AES38_02295		PATRIC.28447.7.CP012573.CDS.452528.453292.rev	PATRIC	CDS	452528	453292	765	-	FIG00638284	PLF_1573_00002112	PGF_01251423		254		hypothetical protein
Clavibacter michiganensis strain PF008	28447.7	CP012573	fig|28447.7.peg.468	AES38_02300		PATRIC.28447.7.CP012573.CDS.453409.455898.rev	PATRIC	CDS	453409	455898	2490	-	FIG00133034	PLF_1573_00001193	PGF_00424968		829		Excinuclease ABC subunit A paralog of unknown function
Clavibacter michiganensis strain PF008	28447.7	CP012573	fig|28447.7.peg.469	AES38_02305		PATRIC.28447.7.CP012573.CDS.455969.456181.rev	PATRIC	CDS	455969	456181	213	-	FIG00511230	PLF_1573_00002130	PGF_01251435		70		FIG00511233: hypothetical protein
Clavibacter michiganensis strain PF008	28447.7	CP012573	fig|28447.7.peg.470	AES38_02310		PATRIC.28447.7.CP012573.CDS.456416.457459.rev	PATRIC	CDS	456416	457459	1044	-	FIG00038814	PLF_1573_00000700	PGF_00046326		347		RNA polymerase sigma factor RpoD
Clavibacter michiganensis strain PF008	28447.7	CP012573	fig|28447.7.peg.471	AES38_02315		PATRIC.28447.7.CP012573.CDS.457776.458420.fwd	PATRIC	CDS	457776	458420	645	+	FIG00004688	PLF_1573_00001439	PGF_00013479		214		Hypothetical, related to broad specificity phosphatases COG0406
Clavibacter michiganensis strain PF008	28447.7	CP012573	fig|28447.7.peg.472	AES38_02320		PATRIC.28447.7.CP012573.CDS.458420.459031.fwd	PATRIC	CDS	458420	459031	612	+	FIG00618007	PLF_1573_00001845	PGF_00056718		203		Thiol:disulfide oxidoreductase related to ResA
Clavibacter michiganensis strain PF008	28447.7	CP012573	fig|28447.7.peg.473	AES38_02325		PATRIC.28447.7.CP012573.CDS.459032.459772.fwd	PATRIC	CDS	459032	459772	741	+	FIG00133238	PLF_1573_00001526	PGF_00420473		246		Cytochrome c-type biogenesis protein CcdA (DsbD analog)
Clavibacter michiganensis strain PF008	28447.7	CP012573	fig|28447.7.peg.474	AES38_02330		PATRIC.28447.7.CP012573.CDS.459831.461414.fwd	PATRIC	CDS	459831	461414	1584	+	FIG00003692	PLF_1573_00001355	PGF_00416847		527		Ccs1/ResB-related putative cytochrome C-type biogenesis protein
Clavibacter michiganensis strain PF008	28447.7	CP012573	fig|28447.7.peg.475	AES38_02335		PATRIC.28447.7.CP012573.CDS.461423.462433.fwd	PATRIC	CDS	461423	462433	1011	+	FIG00001246	PLF_1573_00001402	PGF_00420506		336		Cytochrome c-type biogenesis protein CcsA/ResC
Clavibacter michiganensis strain PF008	28447.7	CP012573	fig|28447.7.peg.476	AES38_02340		PATRIC.28447.7.CP012573.CDS.462470.463453.rev	PATRIC	CDS	462470	463453	984	-	FIG01306622	PLF_1573_00000563	PGF_00026797		327		O-succinylbenzoate synthase (EC 4.2.1.113)
Clavibacter michiganensis strain PF008	28447.7	CP012573	fig|28447.7.peg.477	AES38_02345		PATRIC.28447.7.CP012573.CDS.463508.464419.fwd	PATRIC	CDS	463508	464419	912	+	FIG00071623	PLF_1573_00002435	PGF_00025379		303		Naphthoate synthase (EC 4.1.3.36)
Clavibacter michiganensis strain PF008	28447.7	CP012573	fig|28447.7.peg.478	AES38_02350		PATRIC.28447.7.CP012573.CDS.464439.465638.fwd	PATRIC	CDS	464439	465638	1200	+	FIG00000860	PLF_1573_00000564	PGF_00026799		399		O-succinylbenzoic acid--CoA ligase (EC 6.2.1.26)
Clavibacter michiganensis strain PF008	28447.7	CP012573	fig|28447.7.peg.479	AES38_02355		PATRIC.28447.7.CP012573.CDS.465729.465950.rev	PATRIC	CDS	465729	465950	222	-		PLF_1573_00002271	PGF_01251495		73		hypothetical protein
Clavibacter michiganensis strain PF008	28447.7	CP012573	fig|28447.7.peg.480	AES38_02360		PATRIC.28447.7.CP012573.CDS.466036.466341.fwd	PATRIC	CDS	466036	466341	306	+	FIG00638284	PLF_1573_00000084	PGF_01253327		101		hypothetical protein
Clavibacter michiganensis strain PF008	28447.7	CP012573	fig|28447.7.peg.481	AES38_02365		PATRIC.28447.7.CP012573.CDS.466331.466870.rev	PATRIC	CDS	466331	466870	540	-	FIG00004727	PLF_1573_00000554	PGF_01253288		179		NTP pyrophosphohydrolases including oxidative damage repair enzymes
Clavibacter michiganensis strain PF008	28447.7	CP012573	fig|28447.7.peg.482	AES38_02370		PATRIC.28447.7.CP012573.CDS.466880.467485.rev	PATRIC	CDS	466880	467485	606	-	FIG01201435	PLF_1573_00000471	PGF_00027386		201		Acetyltransferase
Clavibacter michiganensis strain PF008	28447.7	CP012573	fig|28447.7.peg.483	AES38_02375		PATRIC.28447.7.CP012573.CDS.467499.468137.rev	PATRIC	CDS	467499	468137	639	-	FIG01313145	PLF_1573_00000439	PGF_00027269		212		Acetyltransferase
Clavibacter michiganensis strain PF008	28447.7	CP012573	fig|28447.7.peg.484	AES38_02380		PATRIC.28447.7.CP012573.CDS.468134.469453.rev	PATRIC	CDS	468134	469453	1320	-	FIG00004795	PLF_1573_00000337	PGF_00008334		439		Glutamyl-tRNA reductase (EC 1.2.1.70)
Clavibacter michiganensis strain PF008	28447.7	CP012573	fig|28447.7.peg.485	AES38_02385		PATRIC.28447.7.CP012573.CDS.469568.470692.fwd	PATRIC	CDS	469568	470692	1125	+	FIG00000428	PLF_1573_00002546	PGF_00066270		374		Uroporphyrinogen III decarboxylase (EC 4.1.1.37)
Clavibacter michiganensis strain PF008	28447.7	CP012573	fig|28447.7.peg.486	AES38_02390		PATRIC.28447.7.CP012573.CDS.470685.472124.fwd	PATRIC	CDS	470685	472124	1440	+	FIG00068302	PLF_1573_00000658	PGF_00038877		479		Protoporphyrinogen IX oxidase, aerobic, HemY (EC 1.3.3.4)
Clavibacter michiganensis strain PF008	28447.7	CP012573	fig|28447.7.peg.487	AES38_02395		PATRIC.28447.7.CP012573.CDS.472252.472593.fwd	PATRIC	CDS	472252	472593	342	+		PLF_1573_00002746	PGF_01251630		113		hypothetical protein
Clavibacter michiganensis strain PF008	28447.7	CP012573	fig|28447.7.peg.488	AES38_02400		PATRIC.28447.7.CP012573.CDS.472626.473042.fwd	PATRIC	CDS	472626	473042	417	+	FIG00512653	PLF_1573_00002209	PGF_00407537		138		putative integral membrane protein
Clavibacter michiganensis strain PF008	28447.7	CP012573	fig|28447.7.peg.489	AES38_02405		PATRIC.28447.7.CP012573.CDS.473032.473307.fwd	PATRIC	CDS	473032	473307	276	+	FIG00512342	PLF_1573_00002052	PGF_01251388		91		FIG00512343: hypothetical protein
Clavibacter michiganensis strain PF008	28447.7	CP012573	fig|28447.7.peg.490	AES38_02410		PATRIC.28447.7.CP012573.CDS.473331.474968.fwd	PATRIC	CDS	473331	474968	1638	+	FIG01037873	PLF_1573_00002208	PGF_00407644		545		putative integral membrane protein
Clavibacter michiganensis strain PF008	28447.7	CP012573	fig|28447.7.peg.491	AES38_02415		PATRIC.28447.7.CP012573.CDS.475066.475629.fwd	PATRIC	CDS	475066	475629	564	+	FIG00511974	PLF_1573_00002051	PGF_01251387		187		FIG00511976: hypothetical protein
Clavibacter michiganensis strain PF008	28447.7	CP012573	fig|28447.7.peg.492	AES38_02420		PATRIC.28447.7.CP012573.CDS.475690.476469.fwd	PATRIC	CDS	475690	476469	780	+	FIG00003629	PLF_1573_00001207	PGF_00419621		259		Coproheme decarboxylase HemQ (no EC)
Clavibacter michiganensis strain PF008	28447.7	CP012573	fig|28447.7.peg.493	AES38_02425		PATRIC.28447.7.CP012573.CDS.476469.477719.fwd	PATRIC	CDS	476469	477719	1251	+	FIG00000345	PLF_1573_00002353	PGF_00004648		416		Ferrochelatase, protoheme ferro-lyase (EC 4.99.1.1)
Clavibacter michiganensis strain PF008	28447.7	CP012573	fig|28447.7.peg.494	AES38_02430		PATRIC.28447.7.CP012573.CDS.477716.478702.fwd	PATRIC	CDS	477716	478702	987	+	FIG00000363	PLF_1573_00000626	PGF_00034983		328		Porphobilinogen deaminase (EC 2.5.1.61)
Clavibacter michiganensis strain PF008	28447.7	CP012573	fig|28447.7.peg.495	AES38_02435		PATRIC.28447.7.CP012573.CDS.478699.479538.fwd	PATRIC	CDS	478699	479538	840	+	FIG00056694	PLF_1573_00001959	PGF_00066292		279		Uroporphyrinogen-III synthase (EC 4.2.1.75)
Clavibacter michiganensis strain PF008	28447.7	CP012573	fig|28447.7.peg.496	AES38_02440		PATRIC.28447.7.CP012573.CDS.479535.480515.fwd	PATRIC	CDS	479535	480515	981	+	FIG00000348	PLF_1573_00001674	PGF_00034988		326		Porphobilinogen synthase (EC 4.2.1.24)
Clavibacter michiganensis strain PF008	28447.7	CP012573	fig|28447.7.peg.497	AES38_02445		PATRIC.28447.7.CP012573.CDS.480592.481959.fwd	PATRIC	CDS	480592	481959	1368	+	FIG00000338	PLF_1573_00002361	PGF_00008164		455		Glutamate-1-semialdehyde 2,1-aminomutase (EC 5.4.3.8)
Clavibacter michiganensis strain PF008	28447.7	CP012573	fig|28447.7.peg.498	AES38_02450		PATRIC.28447.7.CP012573.CDS.481964.482785.rev	PATRIC	CDS	481964	482785	822	-	FIG01332517	PLF_1573_00001223	PGF_00422401		273		DNA/RNA non-specific endonuclease
Clavibacter michiganensis strain PF008	28447.7	CP012573	fig|28447.7.peg.499	AES38_02455		PATRIC.28447.7.CP012573.CDS.482827.483486.rev	PATRIC	CDS	482827	483486	660	-	FIG00024032	PLF_1573_00000240	PGF_00011340		219		Heme oxygenase (EC 1.14.99.3)
Clavibacter michiganensis strain PF008	28447.7	CP012573	fig|28447.7.peg.500	AES38_02460		PATRIC.28447.7.CP012573.CDS.483566.483958.rev	PATRIC	CDS	483566	483958	393	-	FIG00946206	PLF_1573_00001044	PGF_00409184		130		putative membrane protein
Clavibacter michiganensis strain PF008	28447.7	CP012573	fig|28447.7.peg.501	AES38_02465		PATRIC.28447.7.CP012573.CDS.484043.485068.rev	PATRIC	CDS	484043	485068	1026	-	FIG01007502	PLF_1573_00000126	PGF_00029761		341		Acryloyl-CoA reductase AcuI/YhdH (EC 1.3.1.84)
Clavibacter michiganensis strain PF008	28447.7	CP012573	fig|28447.7.peg.502	AES38_02470		PATRIC.28447.7.CP012573.CDS.485125.486168.rev	PATRIC	CDS	485125	486168	1044	-	FIG00058830	PLF_1573_00001147	PGF_00427201		347		6-phosphofructokinase (EC 2.7.1.11)
Clavibacter michiganensis strain PF008	28447.7	CP012573	fig|28447.7.peg.503	AES38_02475		PATRIC.28447.7.CP012573.CDS.486204.487394.rev	PATRIC	CDS	486204	487394	1191	-			PGF_00212806		396		hypothetical protein
Clavibacter michiganensis strain PF008	28447.7	CP012573	fig|28447.7.peg.504	AES38_02480		PATRIC.28447.7.CP012573.CDS.487552.488595.fwd	PATRIC	CDS	487552	488595	1044	+	FIG00638284		PGF_00251055		347		hypothetical protein
Clavibacter michiganensis strain PF008	28447.7	CP012573	fig|28447.7.peg.505	AES38_02485		PATRIC.28447.7.CP012573.CDS.488717.489706.fwd	PATRIC	CDS	488717	489706	990	+			PGF_00048695		329		Ribose ABC transport system, permease protein RbsC (TC 3.A.1.2.1)
Clavibacter michiganensis strain PF008	28447.7	CP012573	fig|28447.7.peg.506	AES38_02490		PATRIC.28447.7.CP012573.CDS.489715.490464.fwd	PATRIC	CDS	489715	490464	750	+			PGF_00375254		249		Inositol transport system ATP-binding protein
Clavibacter michiganensis strain PF008	28447.7	CP012573	fig|28447.7.peg.507	AES38_02495		PATRIC.28447.7.CP012573.CDS.490464.491405.fwd	PATRIC	CDS	490464	491405	942	+			PGF_00421048		313		D-tagatose 3-epimerase (EC 5.3.1.-)
Clavibacter michiganensis strain PF008	28447.7	CP012573	fig|28447.7.peg.508	AES38_02500		PATRIC.28447.7.CP012573.CDS.491434.492306.fwd	PATRIC	CDS	491434	492306	873	+	FIG00462201		PGF_00421048		290		D-tagatose 3-epimerase (EC 5.3.1.-)
Clavibacter michiganensis strain PF008	28447.7	CP012573	fig|28447.7.peg.509	AES38_02505		PATRIC.28447.7.CP012573.CDS.492293.492961.fwd	PATRIC	CDS	492293	492961	669	+	FIG00000936	PLF_1573_00000834	PGF_00066250		222		Uridine kinase family protein YggC homolog
Clavibacter michiganensis strain PF008	28447.7	CP012573	fig|28447.7.peg.510	AES38_02510		PATRIC.28447.7.CP012573.CDS.493002.493967.fwd	PATRIC	CDS	493002	493967	966	+	FIG00512438	PLF_1573_00000901	PGF_00251055		321		FIG00512439: hypothetical protein
Clavibacter michiganensis strain PF008	28447.7	CP012573	fig|28447.7.peg.511	AES38_02515		PATRIC.28447.7.CP012573.CDS.494025.494825.rev	PATRIC	CDS	494025	494825	801	-	FIG00511865	PLF_1573_00000103	PGF_01251263		266		putative membrane protein
Clavibacter michiganensis strain PF008	28447.7	CP012573	fig|28447.7.peg.512	AES38_02520		PATRIC.28447.7.CP012573.CDS.494901.495854.fwd	PATRIC	CDS	494901	495854	954	+	FIG01105067	PLF_1573_00003167	PGF_00406257		317		putative aldose-1-epimerase
Clavibacter michiganensis strain PF008	28447.7	CP012573	fig|28447.7.peg.513	AES38_02525		PATRIC.28447.7.CP012573.CDS.495953.496402.fwd	PATRIC	CDS	495953	496402	450	+	FIG00511935	PLF_1573_00001263	PGF_01251289		149		Lactoylglutathione lyase and related lyases
Clavibacter michiganensis strain PF008	28447.7	CP012573	fig|28447.7.peg.514			PATRIC.28447.7.CP012573.CDS.496491.497009.fwd	PATRIC	CDS	496491	497009	519	+	FIG00025887	PLF_1573_00001610	PGF_00027468		172		Organic hydroperoxide resistance transcriptional regulator
Clavibacter michiganensis strain PF008	28447.7	CP012573	fig|28447.7.peg.515	AES38_02535		PATRIC.28447.7.CP012573.CDS.497017.498657.rev	PATRIC	CDS	497017	498657	1641	-	FIG01243735	PLF_1573_00000281	PGF_00016924		546		Levanase (EC 3.2.1.65)
Clavibacter michiganensis strain PF008	28447.7	CP012573	fig|28447.7.peg.516	AES38_02540		PATRIC.28447.7.CP012573.CDS.498925.500490.fwd	PATRIC	CDS	498925	500490	1566	+	FIG01397144	PLF_1573_00001269	PGF_00016926		521		Levansucrase (EC 2.4.1.10)
Clavibacter michiganensis strain PF008	28447.7	CP012573	fig|28447.7.peg.517	AES38_02545		PATRIC.28447.7.CP012573.CDS.500566.501216.fwd	PATRIC	CDS	500566	501216	651	+	FIG00638284	PLF_1573_00004289	PGF_00188761		216		hypothetical protein
Clavibacter michiganensis strain PF008	28447.7	CP012573	fig|28447.7.peg.518	AES38_02550		PATRIC.28447.7.CP012573.CDS.501377.502141.fwd	PATRIC	CDS	501377	502141	765	+	FIG00511718	PLF_1573_00001202	PGF_00419434		254		Conserved membrane protein in copper uptake, YcnI
Clavibacter michiganensis strain PF008	28447.7	CP012573	fig|28447.7.peg.519	AES38_02555		PATRIC.28447.7.CP012573.CDS.502138.502977.fwd	PATRIC	CDS	502138	502977	840	+	FIG01498729	PLF_1573_00001205	PGF_00419551		279		Copper resistance protein CopC
Clavibacter michiganensis strain PF008	28447.7	CP012573	fig|28447.7.peg.520	AES38_02560		PATRIC.28447.7.CP012573.CDS.503063.503965.rev	PATRIC	CDS	503063	503965	903	-	FIG01036965	PLF_1573_00000784	PGF_00059484		300		Transcriptional regulator, LysR family
Clavibacter michiganensis strain PF008	28447.7	CP012573	fig|28447.7.peg.521			PATRIC.28447.7.CP012573.CDS.504444.507785.fwd	PATRIC	CDS	504444	507785	3342	+	FIG00001101	PLF_1573_00000644	PGF_00037523		1113		Proline dehydrogenase (EC 1.5.99.8) (Proline oxidase) / Delta-1-pyrroline-5-carboxylate dehydrogenase (EC 1.2.1.88)
Clavibacter michiganensis strain PF008	28447.7	CP012573	fig|28447.7.peg.522	AES38_02570		PATRIC.28447.7.CP012573.CDS.507786.508247.fwd	PATRIC	CDS	507786	508247	462	+		PLF_1573_00002698	PGF_00313702		153		acetyltransferase
Clavibacter michiganensis strain PF008	28447.7	CP012573	fig|28447.7.peg.523	AES38_02575		PATRIC.28447.7.CP012573.CDS.508287.508949.fwd	PATRIC	CDS	508287	508949	663	+	FIG00512122	PLF_1573_00000076	PGF_00090429		220		FIG00512123: hypothetical protein
Clavibacter michiganensis strain PF008	28447.7	CP012573	fig|28447.7.peg.524			PATRIC.28447.7.CP012573.CDS.508970.509674.fwd	PATRIC	CDS	508970	509674	705	+					234		FIG00512123: hypothetical protein
Clavibacter michiganensis strain PF008	28447.7	CP012573	fig|28447.7.peg.525	AES38_02585		PATRIC.28447.7.CP012573.CDS.509671.510234.fwd	PATRIC	CDS	509671	510234	564	+	FIG00954899	PLF_1573_00000617	PGF_01253293		187		Phosphopantetheinyl transferase
Clavibacter michiganensis strain PF008	28447.7	CP012573	fig|28447.7.peg.526	AES38_02590		PATRIC.28447.7.CP012573.CDS.510239.511552.rev	PATRIC	CDS	510239	511552	1314	-	FIG01424832	PLF_1573_00001055	PGF_00409751		437		putative metallopeptidase
Clavibacter michiganensis strain PF008	28447.7	CP012573	fig|28447.7.peg.527	AES38_02595		PATRIC.28447.7.CP012573.CDS.511549.515610.rev	PATRIC	CDS	511549	515610	4062	-	FIG01122490	PLF_1573_00000060	PGF_00026232		1353		Non-ribosomal peptide synthetase
Clavibacter michiganensis strain PF008	28447.7	CP012573	fig|28447.7.peg.528	AES38_02600		PATRIC.28447.7.CP012573.CDS.515708.516076.rev	PATRIC	CDS	515708	516076	369	-	FIG00621925	PLF_1573_00001878	PGF_00059269		122		Transcriptional regulator, GntR family
Clavibacter michiganensis strain PF008	28447.7	CP012573	fig|28447.7.peg.529	AES38_02605		PATRIC.28447.7.CP012573.CDS.516203.516574.fwd	PATRIC	CDS	516203	516574	372	+	FIG01089471	PLF_1573_00000237	PGF_01251508		123		Circumsporozoite protein
Clavibacter michiganensis strain PF008	28447.7	CP012573	fig|28447.7.peg.530	AES38_02610		PATRIC.28447.7.CP012573.CDS.516651.517037.fwd	PATRIC	CDS	516651	517037	387	+	FIG00638284		PGF_00254193		128		hypothetical protein
Clavibacter michiganensis strain PF008	28447.7	CP012573	fig|28447.7.peg.531	AES38_02615		PATRIC.28447.7.CP012573.CDS.517048.517761.fwd	PATRIC	CDS	517048	517761	714	+	FIG00638284				237		hypothetical protein
Clavibacter michiganensis strain PF008	28447.7	CP012573	fig|28447.7.peg.532	AES38_02620		PATRIC.28447.7.CP012573.CDS.517764.518201.rev	PATRIC	CDS	517764	518201	438	-	FIG01956023	PLF_1573_00002770	PGF_00059044		145		Transcriptional regulator, AsnC family
Clavibacter michiganensis strain PF008	28447.7	CP012573	fig|28447.7.peg.533	AES38_02625		PATRIC.28447.7.CP012573.CDS.518385.519227.fwd	PATRIC	CDS	518385	519227	843	+	FIG00002156	PLF_1573_00001588	PGF_00024969		280		NG,NG-dimethylarginine dimethylaminohydrolase 1 (EC 3.5.3.18)
Clavibacter michiganensis strain PF008	28447.7	CP012573	fig|28447.7.peg.534	AES38_02630		PATRIC.28447.7.CP012573.CDS.519235.520479.fwd	PATRIC	CDS	519235	520479	1245	+	FIG00035201	PLF_1573_00001611	PGF_00027508		414	rocD	Ornithine aminotransferase (EC 2.6.1.13)
Clavibacter michiganensis strain PF008	28447.7	CP012573	fig|28447.7.peg.535	AES38_02635		PATRIC.28447.7.CP012573.CDS.520510.521511.rev	PATRIC	CDS	520510	521511	1002	-	FIG01956050	PLF_1573_00001462	PGF_00014473		333		Integral membrane protein
Clavibacter michiganensis strain PF008	28447.7	CP012573	fig|28447.7.peg.536	AES38_02640		PATRIC.28447.7.CP012573.CDS.521668.522507.rev	PATRIC	CDS	521668	522507	840	-	FIG00638284	PLF_1573_00003564	PGF_01252042		279		hypothetical protein
Clavibacter michiganensis strain PF008	28447.7	CP012573	fig|28447.7.peg.537			PATRIC.28447.7.CP012573.CDS.522504.523697.rev	PATRIC	CDS	522504	523697	1194	-		PLF_1573_00003311	PGF_01251927		397		Putrescine transport ATP-binding protein PotA (TC 3.A.1.11.1)
Clavibacter michiganensis strain PF008	28447.7	CP012573	fig|28447.7.peg.538	AES38_02650		PATRIC.28447.7.CP012573.CDS.523694.524491.rev	PATRIC	CDS	523694	524491	798	-		PLF_1573_00003565	PGF_01252043		265		hypothetical protein
Clavibacter michiganensis strain PF008	28447.7	CP012573	fig|28447.7.peg.539			PATRIC.28447.7.CP012573.CDS.524488.525333.rev	PATRIC	CDS	524488	525333	846	-	FIG00638284	PLF_1573_00003566	PGF_01252044		281		hypothetical protein
Clavibacter michiganensis strain PF008	28447.7	CP012573	fig|28447.7.peg.540			PATRIC.28447.7.CP012573.CDS.525349.526566.fwd	PATRIC	CDS	525349	526566	1218	+	FIG00638284		PGF_00153334		405		hypothetical protein
Clavibacter michiganensis strain PF008	28447.7	CP012573	fig|28447.7.peg.541			PATRIC.28447.7.CP012573.CDS.526693.527733.fwd	PATRIC	CDS	526693	527733	1041	+	FIG00638284	PLF_1573_00002664	PGF_00130485		346		hypothetical protein
Clavibacter michiganensis strain PF008	28447.7	CP012573	fig|28447.7.peg.542	AES38_02670		PATRIC.28447.7.CP012573.CDS.527730.528614.rev	PATRIC	CDS	527730	528614	885	-	FIG00022300	PLF_1573_00000823	PGF_00064074		294		UDP-glucose 4-epimerase (EC 5.1.3.2)
Clavibacter michiganensis strain PF008	28447.7	CP012573	fig|28447.7.peg.543	AES38_02675		PATRIC.28447.7.CP012573.CDS.528611.529036.rev	PATRIC	CDS	528611	529036	426	-	FIG00512556	PLF_1573_00000026	PGF_01251546		141		FIG00512561: hypothetical protein
Clavibacter michiganensis strain PF008	28447.7	CP012573	fig|28447.7.peg.544	AES38_02680		PATRIC.28447.7.CP012573.CDS.529033.530268.rev	PATRIC	CDS	529033	530268	1236	-	FIG00005723	PLF_1573_00002402	PGF_00400511		411		Benzoate transport protein
Clavibacter michiganensis strain PF008	28447.7	CP012573	fig|28447.7.peg.545	AES38_02685		PATRIC.28447.7.CP012573.CDS.530529.531782.fwd	PATRIC	CDS	530529	531782	1254	+	FIG00511203	PLF_1573_00002587	PGF_01251541		417		FIG00511204: hypothetical protein
Clavibacter michiganensis strain PF008	28447.7	CP012573	fig|28447.7.peg.546	AES38_02690		PATRIC.28447.7.CP012573.CDS.531828.532562.fwd	PATRIC	CDS	531828	532562	735	+	FIG00016132	PLF_1573_00002747	PGF_01251631		244		putative esterase
Clavibacter michiganensis strain PF008	28447.7	CP012573	fig|28447.7.peg.547	AES38_02695		PATRIC.28447.7.CP012573.CDS.532726.533181.fwd	PATRIC	CDS	532726	533181	456	+	FIG01005261	PLF_1573_00001951	PGF_01251344		151		Uncharacterized 17.2 kDa protein in melC2-rnhH intergenic region (ORF3)
Clavibacter michiganensis strain PF008	28447.7	CP012573	fig|28447.7.peg.548	AES38_02700		PATRIC.28447.7.CP012573.CDS.533184.533420.fwd	PATRIC	CDS	533184	533420	237	+		PLF_1573_00002760	PGF_00079762		78		hypothetical protein
Clavibacter michiganensis strain PF008	28447.7	CP012573	fig|28447.7.peg.549	AES38_02705		PATRIC.28447.7.CP012573.CDS.533553.534329.fwd	PATRIC	CDS	533553	534329	777	+	FIG00638284	PLF_1573_00002618	PGF_00297336		258		hypothetical protein
Clavibacter michiganensis strain PF008	28447.7	CP012573	fig|28447.7.peg.550	AES38_02710		PATRIC.28447.7.CP012573.CDS.534529.535602.fwd	PATRIC	CDS	534529	535602	1074	+	FIG01224581	PLF_1573_00001580	PGF_00024363		357		NAD(P)H-dependent 2-cyclohexen-1-one reductase
Clavibacter michiganensis strain PF008	28447.7	CP012573	fig|28447.7.peg.551	AES38_02715		PATRIC.28447.7.CP012573.CDS.535649.536347.rev	PATRIC	CDS	535649	536347	699	-	FIG01124340	PLF_1573_00001923	PGF_00062831		232		Two-component system response regulator
Clavibacter michiganensis strain PF008	28447.7	CP012573	fig|28447.7.peg.552	AES38_02720		PATRIC.28447.7.CP012573.CDS.536344.537609.rev	PATRIC	CDS	536344	537609	1266	-	FIG00512426	PLF_1573_00001928	PGF_00062944		421		Two-component system sensor kinase
Clavibacter michiganensis strain PF008	28447.7	CP012573	fig|28447.7.peg.553	AES38_02725		PATRIC.28447.7.CP012573.CDS.537678.538034.rev	PATRIC	CDS	537678	538034	357	-	FIG00511619	PLF_1573_00002050	PGF_00161529		118		FIG00511620: hypothetical protein
Clavibacter michiganensis strain PF008	28447.7	CP012573	fig|28447.7.peg.554	AES38_02730		PATRIC.28447.7.CP012573.CDS.538120.538719.rev	PATRIC	CDS	538120	538719	600	-	FIG00554417	PLF_1573_00000775	PGF_00058904		199		Transcriptional regulator, AcrR family
Clavibacter michiganensis strain PF008	28447.7	CP012573	fig|28447.7.peg.555	AES38_02735		PATRIC.28447.7.CP012573.CDS.538780.540360.fwd	PATRIC	CDS	538780	540360	1581	+	FIG00511353	PLF_1573_00001734	PGF_00044542		526		Putative transmembrane efflux protein
Clavibacter michiganensis strain PF008	28447.7	CP012573	fig|28447.7.peg.556	AES38_02740		PATRIC.28447.7.CP012573.CDS.540437.541471.rev	PATRIC	CDS	540437	541471	1035	-	FIG00455028	PLF_1573_00000473	PGF_00040703		344		Alkanal monooxygenase alpha chain (EC 1.14.14.3)
Clavibacter michiganensis strain PF008	28447.7	CP012573	fig|28447.7.peg.557	AES38_02745		PATRIC.28447.7.CP012573.CDS.541506.542528.rev	PATRIC	CDS	541506	542528	1023	-	FIG00455028	PLF_1573_00000155	PGF_00040703		340		Alkanal monooxygenase alpha chain (EC 1.14.14.3)
Clavibacter michiganensis strain PF008	28447.7	CP012573	fig|28447.7.peg.558	AES38_02750		PATRIC.28447.7.CP012573.CDS.542571.542891.rev	PATRIC	CDS	542571	542891	321	-		PLF_1573_00004534	PGF_01252757		106		Transcriptional regulator
Clavibacter michiganensis strain PF008	28447.7	CP012573	fig|28447.7.peg.559	AES38_02755		PATRIC.28447.7.CP012573.CDS.542884.543342.rev	PATRIC	CDS	542884	543342	459	-		PLF_1573_00003568	PGF_01252046		152		hypothetical protein
Clavibacter michiganensis strain PF008	28447.7	CP012573	fig|28447.7.peg.560	AES38_02760		PATRIC.28447.7.CP012573.CDS.543398.544363.rev	PATRIC	CDS	543398	544363	966	-	FIG00002982	PLF_1573_00000697	PGF_00046129		321		Quinone oxidoreductase (EC 1.6.5.5)
Clavibacter michiganensis strain PF008	28447.7	CP012573	fig|28447.7.peg.561			PATRIC.28447.7.CP012573.CDS.544395.544712.rev	PATRIC	CDS	544395	544712	318	-		PLF_1573_00004703	PGF_01252912		105		hypothetical protein
Clavibacter michiganensis strain PF008	28447.7	CP012573	fig|28447.7.peg.562			PATRIC.28447.7.CP012573.CDS.544841.545059.fwd	PATRIC	CDS	544841	545059	219	+					72		hypothetical protein
Clavibacter michiganensis strain PF008	28447.7	CP012573	fig|28447.7.peg.563	AES38_02770		PATRIC.28447.7.CP012573.CDS.545319.546257.fwd	PATRIC	CDS	545319	546257	939	+	FIG00064110	PLF_1573_00001397	PGF_00420075		312		Cysteine synthase (EC 2.5.1.47)
Clavibacter michiganensis strain PF008	28447.7	CP012573	fig|28447.7.peg.564	AES38_02775		PATRIC.28447.7.CP012573.CDS.546260.546844.fwd	PATRIC	CDS	546260	546844	585	+	FIG00000128	PLF_1573_00000730	PGF_00051193		194		Serine acetyltransferase (EC 2.3.1.30)
Clavibacter michiganensis strain PF008	28447.7	CP012573	fig|28447.7.peg.565	AES38_02780		PATRIC.28447.7.CP012573.CDS.546844.547518.fwd	PATRIC	CDS	546844	547518	675	+	FIG01651823	PLF_1573_00002195	PGF_00403994		224		probable RNA methyltransferase
Clavibacter michiganensis strain PF008	28447.7	CP012573	fig|28447.7.peg.566	AES38_02785		PATRIC.28447.7.CP012573.CDS.547534.548016.rev	PATRIC	CDS	547534	548016	483	-	FIG00638284	PLF_1573_00003569	PGF_00059570		160		Transcriptional regulator, MarR family
Clavibacter michiganensis strain PF008	28447.7	CP012573	fig|28447.7.peg.567			PATRIC.28447.7.CP012573.CDS.548040.548996.fwd	PATRIC	CDS	548040	548996	957	+	FIG00846773	PLF_1573_00002878	PGF_00031238		318		Permease of the drug/metabolite transporter (DMT) superfamily
Clavibacter michiganensis strain PF008	28447.7	CP012573	fig|28447.7.peg.568	AES38_02795		PATRIC.28447.7.CP012573.CDS.548996.549577.fwd	PATRIC	CDS	548996	549577	582	+	FIG01785485	PLF_1573_00001946	PGF_00064225		193		UPF0157 protein SCO7215
Clavibacter michiganensis strain PF008	28447.7	CP012573	fig|28447.7.peg.569	AES38_02800		PATRIC.28447.7.CP012573.CDS.549586.549987.rev	PATRIC	CDS	549586	549987	402	-	FIG00638284	PLF_1573_00000900	PGF_01253364		133		hypothetical protein
Clavibacter michiganensis strain PF008	28447.7	CP012573	fig|28447.7.peg.570			PATRIC.28447.7.CP012573.CDS.550153.550245.fwd	PATRIC	CDS	550153	550245	93	+		PLF_1573_00002497	PGF_00049017		30		RidA/YER057c/UK114 superfamily protein
Clavibacter michiganensis strain PF008	28447.7	CP012573	fig|28447.7.peg.571	AES38_02805		PATRIC.28447.7.CP012573.CDS.550268.550564.rev	PATRIC	CDS	550268	550564	297	-		PLF_1573_00004566	PGF_01252788		98		hypothetical protein
Clavibacter michiganensis strain PF008	28447.7	CP012573	fig|28447.7.peg.572	AES38_02810		PATRIC.28447.7.CP012573.CDS.550647.551648.rev	PATRIC	CDS	550647	551648	1002	-	FIG00000687	PLF_1573_00002408	PGF_00035193		333		Adenosine deaminase (EC 3.5.4.4)
Clavibacter michiganensis strain PF008	28447.7	CP012573	fig|28447.7.peg.573	AES38_02815		PATRIC.28447.7.CP012573.CDS.551828.552634.rev	PATRIC	CDS	551828	552634	807	-		PLF_1573_00000103	PGF_01251263		268		putative membrane protein
Clavibacter michiganensis strain PF008	28447.7	CP012573	fig|28447.7.peg.574	AES38_02820		PATRIC.28447.7.CP012573.CDS.552726.554825.rev	PATRIC	CDS	552726	554825	2100	-	FIG00001556	PLF_1573_00000057	PGF_00419570		699		Copper resistance protein CopD / Cytochrome c oxidase caa3-type assembly factor CtaG_BS (unrelated to Cox11-CtaG family)
Clavibacter michiganensis strain PF008	28447.7	CP012573	fig|28447.7.peg.575	AES38_02825		PATRIC.28447.7.CP012573.CDS.555032.555649.rev	PATRIC	CDS	555032	555649	618	-	FIG00638284				205		hypothetical protein
Clavibacter michiganensis strain PF008	28447.7	CP012573	fig|28447.7.peg.576	AES38_02830		PATRIC.28447.7.CP012573.CDS.556127.557782.fwd	PATRIC	CDS	556127	557782	1656	+			PGF_00005174		551		ABC transporter, permease protein
Clavibacter michiganensis strain PF008	28447.7	CP012573	fig|28447.7.peg.577	AES38_02835		PATRIC.28447.7.CP012573.CDS.557905.559584.rev	PATRIC	CDS	557905	559584	1680	-	FIG00745599	PLF_1573_00000195	PGF_00047555		559		Alpha-glucosidase (EC 3.2.1.20)
Clavibacter michiganensis strain PF008	28447.7	CP012573	fig|28447.7.peg.578	AES38_02840		PATRIC.28447.7.CP012573.CDS.559791.560837.rev	PATRIC	CDS	559791	560837	1047	-	FIG01007502	PLF_1573_00002856	PGF_00037648		348		Alcohol dehydrogenase (EC 1.1.1.1)
Clavibacter michiganensis strain PF008	28447.7	CP012573	fig|28447.7.peg.579	AES38_02845		PATRIC.28447.7.CP012573.CDS.560991.562409.fwd	PATRIC	CDS	560991	562409	1419	+	FIG00638284	PLF_1573_00002194	PGF_00402369		472		para-nitrobenzyl esterase (intracellular esterase B)
Clavibacter michiganensis strain PF008	28447.7	CP012573	fig|28447.7.peg.580	AES38_02850		PATRIC.28447.7.CP012573.CDS.562454.562954.fwd	PATRIC	CDS	562454	562954	501	+		PLF_1573_00004364	PGF_01252603		166		hypothetical protein
Clavibacter michiganensis strain PF008	28447.7	CP012573	fig|28447.7.peg.581	AES38_02855		PATRIC.28447.7.CP012573.CDS.563048.564196.fwd	PATRIC	CDS	563048	564196	1149	+	FIG01292486	PLF_1573_00003570	PGF_00056844		382		Threonine dehydrogenase and related Zn-dependent dehydrogenases
Clavibacter michiganensis strain PF008	28447.7	CP012573	fig|28447.7.peg.582	AES38_02860		PATRIC.28447.7.CP012573.CDS.564206.564763.fwd	PATRIC	CDS	564206	564763	558	+		PLF_1573_00003571	PGF_00140966		185		hypothetical protein
Clavibacter michiganensis strain PF008	28447.7	CP012573	fig|28447.7.peg.583	AES38_02865		PATRIC.28447.7.CP012573.CDS.564788.565258.rev	PATRIC	CDS	564788	565258	471	-	FIG00004255	PLF_1573_00001754	PGF_00047152		156		Redox-sensitive transcriptional activator SoxR
Clavibacter michiganensis strain PF008	28447.7	CP012573	fig|28447.7.peg.584	AES38_02870		PATRIC.28447.7.CP012573.CDS.565365.565691.fwd	PATRIC	CDS	565365	565691	327	+	FIG00551095	PLF_1573_00000015	PGF_00425425		108		4Fe-4S ferredoxin, iron-sulfur binding
Clavibacter michiganensis strain PF008	28447.7	CP012573	fig|28447.7.peg.585	AES38_02875		PATRIC.28447.7.CP012573.CDS.565688.566182.fwd	PATRIC	CDS	565688	566182	495	+	FIG00919395	PLF_1573_00000552	PGF_00024631		164		NADH-FMN oxidoreductase
Clavibacter michiganensis strain PF008	28447.7	CP012573	fig|28447.7.peg.586	AES38_02880		PATRIC.28447.7.CP012573.CDS.566209.568119.rev	PATRIC	CDS	566209	568119	1911	-	FIG00511242	PLF_1573_00002720	PGF_00410533		636		putative secreted protein
Clavibacter michiganensis strain PF008	28447.7	CP012573	fig|28447.7.peg.587	AES38_02885		PATRIC.28447.7.CP012573.CDS.568248.568868.fwd	PATRIC	CDS	568248	568868	621	+	FIG00511535	PLF_1573_00000516	PGF_00020455		206		Metal-dependent phosphohydrolase, HD subdomain
Clavibacter michiganensis strain PF008	28447.7	CP012573	fig|28447.7.peg.588			PATRIC.28447.7.CP012573.CDS.569006.570448.fwd	PATRIC	CDS	569006	570448	1443	+	FIG00638284				480		hypothetical protein
Clavibacter michiganensis strain PF008	28447.7	CP012573	fig|28447.7.peg.589	AES38_02895		PATRIC.28447.7.CP012573.CDS.570558.572663.rev	PATRIC	CDS	570558	572663	2106	-	FIG00512504	PLF_1573_00000603	PGF_01253291		701		Phage infection protein
Clavibacter michiganensis strain PF008	28447.7	CP012573	fig|28447.7.peg.590	AES38_02900		PATRIC.28447.7.CP012573.CDS.572660.573328.rev	PATRIC	CDS	572660	573328	669	-	FIG00511403	PLF_1573_00000083	PGF_00359565		222		FIG00511404: hypothetical protein
Clavibacter michiganensis strain PF008	28447.7	CP012573	fig|28447.7.peg.591	AES38_02905		PATRIC.28447.7.CP012573.CDS.573325.573981.rev	PATRIC	CDS	573325	573981	657	-	FIG00554417	PLF_1573_00001864	PGF_00058904		218		Transcriptional regulator, AcrR family
Clavibacter michiganensis strain PF008	28447.7	CP012573	fig|28447.7.peg.592	AES38_02910		PATRIC.28447.7.CP012573.CDS.574063.575331.rev	PATRIC	CDS	574063	575331	1269	-		PLF_1573_00001870	PGF_00058955		422		Transcriptional regulator, AraC family
Clavibacter michiganensis strain PF008	28447.7	CP012573	fig|28447.7.peg.593	AES38_02915		PATRIC.28447.7.CP012573.CDS.575640.575843.fwd	PATRIC	CDS	575640	575843	204	+	FIG00946206	PLF_1573_00001011	PGF_01251259		67		Cytochrome c-type biogenesis protein DsbD, protein-disulfide reductase (EC 1.8.1.8)
Clavibacter michiganensis strain PF008	28447.7	CP012573	fig|28447.7.peg.594	AES38_02920		PATRIC.28447.7.CP012573.CDS.575869.578856.rev	PATRIC	CDS	575869	578856	2988	-	FIG01304601	PLF_1573_00000214	PGF_00425080		995		Exonuclease SbcC
Clavibacter michiganensis strain PF008	28447.7	CP012573	fig|28447.7.peg.595	AES38_02925		PATRIC.28447.7.CP012573.CDS.578856.580019.rev	PATRIC	CDS	578856	580019	1164	-	FIG00000782	PLF_1573_00000343	PGF_00425092		387		Exonuclease SbcD
Clavibacter michiganensis strain PF008	28447.7	CP012573	fig|28447.7.peg.596	AES38_02930		PATRIC.28447.7.CP012573.CDS.580106.580927.rev	PATRIC	CDS	580106	580927	822	-		PLF_1573_00002442	PGF_00028699		273		Oxidoreductase of short-chain
Clavibacter michiganensis strain PF008	28447.7	CP012573	fig|28447.7.peg.597	AES38_02935		PATRIC.28447.7.CP012573.CDS.581064.581540.fwd	PATRIC	CDS	581064	581540	477	+	FIG01527801	PLF_1573_00002049	PGF_00308814		158		FIG00389962: hypothetical protein
Clavibacter michiganensis strain PF008	28447.7	CP012573	fig|28447.7.peg.598	AES38_02940		PATRIC.28447.7.CP012573.CDS.581615.582904.fwd	PATRIC	CDS	581615	582904	1290	+	FIG00000107	PLF_1573_00001135	PGF_00035752		429		Adenylosuccinate synthetase (EC 6.3.4.4)
Clavibacter michiganensis strain PF008	28447.7	CP012573	fig|28447.7.peg.599			PATRIC.28447.7.CP012573.CDS.583030.583125.fwd	PATRIC	CDS	583030	583125	96	+	FIG00638284	PLF_1573_00002188	PGF_01251468		31		hypothetical protein
Clavibacter michiganensis strain PF008	28447.7	CP012573	fig|28447.7.peg.600	AES38_02945		PATRIC.28447.7.CP012573.CDS.583137.583589.rev	PATRIC	CDS	583137	583589	453	-	FIG00554610	PLF_1573_00001894	PGF_00059570		150		Transcriptional regulator, MarR family
Clavibacter michiganensis strain PF008	28447.7	CP012573	fig|28447.7.peg.601	AES38_02950		PATRIC.28447.7.CP012573.CDS.583651.584019.fwd	PATRIC	CDS	583651	584019	369	+	FIG00511730	PLF_1573_00002586	PGF_00369657		122		FIG00511731: hypothetical protein
Clavibacter michiganensis strain PF008	28447.7	CP012573	fig|28447.7.peg.602	AES38_02955		PATRIC.28447.7.CP012573.CDS.584154.584582.fwd	PATRIC	CDS	584154	584582	429	+	FIG00511715	PLF_1573_00002048	PGF_01251386		142		FIG00511716: hypothetical protein
Clavibacter michiganensis strain PF008	28447.7	CP012573	fig|28447.7.peg.603	AES38_02960		PATRIC.28447.7.CP012573.CDS.584605.585576.rev	PATRIC	CDS	584605	585576	972	-	FIG00133285	PLF_1573_00000231	PGF_01251503		323		Beta-ketoadipate enol-lactone hydrolase (EC 3.1.1.24)
Clavibacter michiganensis strain PF008	28447.7	CP012573	fig|28447.7.peg.604	AES38_02965		PATRIC.28447.7.CP012573.CDS.585675.586817.fwd	PATRIC	CDS	585675	586817	1143	+			PGF_03761157		380		HigA protein (antitoxin to HigB)
Clavibacter michiganensis strain PF008	28447.7	CP012573	fig|28447.7.peg.605	AES38_02970		PATRIC.28447.7.CP012573.CDS.586817.587302.fwd	PATRIC	CDS	586817	587302	486	+		PLF_1573_00004376	PGF_01252615		161		hypothetical protein
Clavibacter michiganensis strain PF008	28447.7	CP012573	fig|28447.7.peg.606	AES38_02975		PATRIC.28447.7.CP012573.CDS.587342.588826.rev	PATRIC	CDS	587342	588826	1485	-	FIG00000846	PLF_1573_00000606	PGF_01253292		494		PhoR
Clavibacter michiganensis strain PF008	28447.7	CP012573	fig|28447.7.peg.607	AES38_02980		PATRIC.28447.7.CP012573.CDS.588823.589491.rev	PATRIC	CDS	588823	589491	669	-	FIG01318196	PLF_1573_00002243	PGF_00411523		222		regulatory protein
Clavibacter michiganensis strain PF008	28447.7	CP012573	fig|28447.7.peg.608			PATRIC.28447.7.CP012573.CDS.589514.590338.fwd	PATRIC	CDS	589514	590338	825	+	FIG00638284	PLF_1573_00003191	PGF_00261528		274		hypothetical protein
Clavibacter michiganensis strain PF008	28447.7	CP012573	fig|28447.7.peg.609	AES38_02990		PATRIC.28447.7.CP012573.CDS.590409.591053.fwd	PATRIC	CDS	590409	591053	645	+	FIG00989082	PLF_1573_00001103	PGF_00027931		214		Acetyltransferase, GNAT family
Clavibacter michiganensis strain PF008	28447.7	CP012573	fig|28447.7.peg.610	AES38_02995		PATRIC.28447.7.CP012573.CDS.591105.591614.rev	PATRIC	CDS	591105	591614	510	-	FIG00512066	PLF_1573_00002047	PGF_01251385		169		FIG00512067: hypothetical protein
Clavibacter michiganensis strain PF008	28447.7	CP012573	fig|28447.7.peg.611	AES38_03000		PATRIC.28447.7.CP012573.CDS.592025.594094.fwd	PATRIC	CDS	592025	594094	2070	+	FIG00000747	PLF_1573_00000483	PGF_00402178		689		Beta-lactamase (EC 3.5.2.6)
Clavibacter michiganensis strain PF008	28447.7	CP012573	fig|28447.7.peg.612	AES38_03005		PATRIC.28447.7.CP012573.CDS.594094.595530.fwd	PATRIC	CDS	594094	595530	1437	+	FIG00512664	PLF_1573_00001930	PGF_00062944		478		Two-component system sensor kinase
Clavibacter michiganensis strain PF008	28447.7	CP012573	fig|28447.7.peg.613	AES38_03010		PATRIC.28447.7.CP012573.CDS.595527.596192.fwd	PATRIC	CDS	595527	596192	666	+	FIG01124340	PLF_1573_00001927	PGF_00062831		221		Two-component system response regulator
Clavibacter michiganensis strain PF008	28447.7	CP012573	fig|28447.7.peg.614	AES38_03015		PATRIC.28447.7.CP012573.CDS.596342.596761.fwd	PATRIC	CDS	596342	596761	420	+	FIG00138617	PLF_1573_00001608	PGF_00027464		139		Organic hydroperoxide resistance protein
Clavibacter michiganensis strain PF008	28447.7	CP012573	fig|28447.7.peg.615	AES38_03020		PATRIC.28447.7.CP012573.CDS.596848.597243.fwd	PATRIC	CDS	596848	597243	396	+	FIG00001498	PLF_1573_00000361	PGF_00417816		131		Chorismate mutase I (EC 5.4.99.5)
Clavibacter michiganensis strain PF008	28447.7	CP012573	fig|28447.7.peg.616	AES38_03025		PATRIC.28447.7.CP012573.CDS.597257.598240.rev	PATRIC	CDS	597257	598240	984	-	FIG00511594	PLF_1573_00002045	PGF_00073709		327		FIG00511595: hypothetical protein
Clavibacter michiganensis strain PF008	28447.7	CP012573	fig|28447.7.peg.617	AES38_03030		PATRIC.28447.7.CP012573.CDS.598311.599141.rev	PATRIC	CDS	598311	599141	831	-	FIG00512251	PLF_1573_00001538	PGF_00424375		276		Endonuclease/exonuclease/phosphatase family protein
Clavibacter michiganensis strain PF008	28447.7	CP012573	fig|28447.7.peg.618	AES38_03035		PATRIC.28447.7.CP012573.CDS.599188.599775.rev	PATRIC	CDS	599188	599775	588	-	FIG00512093	PLF_1573_00002044	PGF_01251384		195		FIG00512096: hypothetical protein
Clavibacter michiganensis strain PF008	28447.7	CP012573	fig|28447.7.peg.619	AES38_03040		PATRIC.28447.7.CP012573.CDS.599941.601815.rev	PATRIC	CDS	599941	601815	1875	-	FIG00512034	PLF_1573_00000521	PGF_00020861		624		Methyl-accepting chemotaxis protein
Clavibacter michiganensis strain PF008	28447.7	CP012573	fig|28447.7.peg.620	AES38_03045		PATRIC.28447.7.CP012573.CDS.601812.603488.rev	PATRIC	CDS	601812	603488	1677	-	FIG00511467	PLF_1573_00000082	PGF_00340637		558		FIG00511468: hypothetical protein
Clavibacter michiganensis strain PF008	28447.7	CP012573	fig|28447.7.peg.621	AES38_03050		PATRIC.28447.7.CP012573.CDS.603467.604516.rev	PATRIC	CDS	603467	604516	1050	-	FIG00511821	PLF_1573_00000696	PGF_01253306		349		Pyruvyl-transferase
Clavibacter michiganensis strain PF008	28447.7	CP012573	fig|28447.7.peg.622	AES38_03055		PATRIC.28447.7.CP012573.CDS.604513.605691.rev	PATRIC	CDS	604513	605691	1179	-	FIG01334593	PLF_1573_00001056	PGF_01251269		392		putative minor tail protein
Clavibacter michiganensis strain PF008	28447.7	CP012573	fig|28447.7.peg.623	AES38_03060		PATRIC.28447.7.CP012573.CDS.605688.606734.rev	PATRIC	CDS	605688	606734	1047	-	FIG00853015	PLF_1573_00000109	PGF_01251278		348		Glycosyl transferase, group 1 family protein
Clavibacter michiganensis strain PF008	28447.7	CP012573	fig|28447.7.peg.624	AES38_03065		PATRIC.28447.7.CP012573.CDS.606734.607864.rev	PATRIC	CDS	606734	607864	1131	-	FIG00007960	PLF_1573_00000121	PGF_00009474		376		Glycosyl transferase, group 1 family protein
Clavibacter michiganensis strain PF008	28447.7	CP012573	fig|28447.7.peg.625	AES38_03070		PATRIC.28447.7.CP012573.CDS.607864.609339.rev	PATRIC	CDS	607864	609339	1476	-	FIG00002968	PLF_1573_00001705	PGF_00041054		491		Putative glycosyltransferase
Clavibacter michiganensis strain PF008	28447.7	CP012573	fig|28447.7.peg.626	AES38_03075		PATRIC.28447.7.CP012573.CDS.609429.610148.rev	PATRIC	CDS	609429	610148	720	-	FIG00044013	PLF_1573_00001273	PGF_00017605		239		Low molecular weight protein-tyrosine-phosphatase Wzb (EC 3.1.3.48)
Clavibacter michiganensis strain PF008	28447.7	CP012573	fig|28447.7.peg.627	AES38_03080		PATRIC.28447.7.CP012573.CDS.610158.611570.rev	PATRIC	CDS	610158	611570	1413	-	FIG00006955	PLF_1573_00002200	PGF_00405721		470		putative ATPase involved in chromosome partitioning
Clavibacter michiganensis strain PF008	28447.7	CP012573	fig|28447.7.peg.628	AES38_03085		PATRIC.28447.7.CP012573.CDS.611785.614052.fwd	PATRIC	CDS	611785	614052	2268	+	FIG00765507	PLF_1573_00000442	PGF_00034424		755		Acyltransferase 3
Clavibacter michiganensis strain PF008	28447.7	CP012573	fig|28447.7.peg.629	AES38_03090		PATRIC.28447.7.CP012573.CDS.614347.615384.rev	PATRIC	CDS	614347	615384	1038	-	FIG00511533	PLF_1573_00000139	PGF_01251300		345		Acyltransferase family protein
Clavibacter michiganensis strain PF008	28447.7	CP012573	fig|28447.7.peg.630	AES38_03095		PATRIC.28447.7.CP012573.CDS.615476.616186.rev	PATRIC	CDS	615476	616186	711	-	FIG00511614	PLF_1573_00002043	PGF_01251383		236		FIG00511615: hypothetical protein
Clavibacter michiganensis strain PF008	28447.7	CP012573	fig|28447.7.peg.631	AES38_03100		PATRIC.28447.7.CP012573.CDS.616388.617440.rev	PATRIC	CDS	616388	617440	1053	-	FIG00511217	PLF_1573_00001142	PGF_00424375		350		Endonuclease/exonuclease/phosphatase family protein
Clavibacter michiganensis strain PF008	28447.7	CP012573	fig|28447.7.peg.632	AES38_03105		PATRIC.28447.7.CP012573.CDS.617688.618485.rev	PATRIC	CDS	617688	618485	798	-	FIG00814168	PLF_1573_00000125	PGF_00423134		265		Dienelactone hydrolase family protein
Clavibacter michiganensis strain PF008	28447.7	CP012573	fig|28447.7.peg.633	AES38_03110		PATRIC.28447.7.CP012573.CDS.618488.620848.rev	PATRIC	CDS	618488	620848	2361	-	FIG01303876	PLF_1573_00000621	PGF_00033961		786		Phosphoribosylformylglycinamidine synthase, synthetase subunit (EC 6.3.5.3)
Clavibacter michiganensis strain PF008	28447.7	CP012573	fig|28447.7.peg.634	AES38_03115		PATRIC.28447.7.CP012573.CDS.620845.621540.rev	PATRIC	CDS	620845	621540	696	-	FIG00025475	PLF_1573_00001663	PGF_00033959		231		Phosphoribosylformylglycinamidine synthase, glutamine amidotransferase subunit (EC 6.3.5.3)
Clavibacter michiganensis strain PF008	28447.7	CP012573	fig|28447.7.peg.635	AES38_03120		PATRIC.28447.7.CP012573.CDS.621540.621932.rev	PATRIC	CDS	621540	621932	393	-	FIG00000869	PLF_1573_00001662	PGF_00033956		130		Phosphoribosylformylglycinamidine synthase, PurS subunit (EC 6.3.5.3)
Clavibacter michiganensis strain PF008	28447.7	CP012573	fig|28447.7.peg.636	AES38_03125		PATRIC.28447.7.CP012573.CDS.622017.622700.rev	PATRIC	CDS	622017	622700	684	-	FIG00512299	PLF_1573_00000899	PGF_00355614		227		FIG00512300: hypothetical protein
Clavibacter michiganensis strain PF008	28447.7	CP012573	fig|28447.7.peg.637	AES38_03130		PATRIC.28447.7.CP012573.CDS.622865.624262.fwd	PATRIC	CDS	622865	624262	1398	+	FIG00613966	PLF_1573_00001910	PGF_00061071		465		Transporter, MFS superfamily
Clavibacter michiganensis strain PF008	28447.7	CP012573	fig|28447.7.peg.638	AES38_03135		PATRIC.28447.7.CP012573.CDS.624335.625009.rev	PATRIC	CDS	624335	625009	675	-	FIG01279495	PLF_1573_00001877	PGF_00059269		224		Transcriptional regulator, GntR family
Clavibacter michiganensis strain PF008	28447.7	CP012573	fig|28447.7.peg.639	AES38_03140		PATRIC.28447.7.CP012573.CDS.625038.625877.fwd	PATRIC	CDS	625038	625877	840	+	FIG01304251	PLF_1573_00001148	PGF_00039711		279		Aliphatic amidase AmiE (EC 3.5.1.4)
Clavibacter michiganensis strain PF008	28447.7	CP012573	fig|28447.7.peg.640	AES38_03145		PATRIC.28447.7.CP012573.CDS.625951.626940.rev	PATRIC	CDS	625951	626940	990	-	FIG00639501	PLF_1573_00001621	PGF_00028782		329		Oxidoreductase, aldo/keto reductase family
Clavibacter michiganensis strain PF008	28447.7	CP012573	fig|28447.7.peg.641	AES38_03150		PATRIC.28447.7.CP012573.CDS.627065.627550.fwd	PATRIC	CDS	627065	627550	486	+	FIG00002441	PLF_1573_00002520	PGF_00059238		161		Transcriptional regulator, Fur family
Clavibacter michiganensis strain PF008	28447.7	CP012573	fig|28447.7.peg.642	AES38_03155		PATRIC.28447.7.CP012573.CDS.627629.629158.fwd	PATRIC	CDS	627629	629158	1530	+	FIG00000313	PLF_1573_00000054	PGF_00416700		509		Catalase (EC 1.11.1.6)
Clavibacter michiganensis strain PF008	28447.7	CP012573	fig|28447.7.peg.643	AES38_03160		PATRIC.28447.7.CP012573.CDS.629246.629767.rev	PATRIC	CDS	629246	629767	522	-	FIG00001650	PLF_1573_00001424	PGF_00012120		173		Histone acetyltransferase HPA2 and related acetyltransferases
Clavibacter michiganensis strain PF008	28447.7	CP012573	fig|28447.7.peg.644	AES38_03165		PATRIC.28447.7.CP012573.CDS.629764.630339.rev	PATRIC	CDS	629764	630339	576	-	FIG00765507	PLF_1573_00003028	PGF_00393432		191		putative acyltransferase
Clavibacter michiganensis strain PF008	28447.7	CP012573	fig|28447.7.peg.645	AES38_03170		PATRIC.28447.7.CP012573.CDS.630427.631584.fwd	PATRIC	CDS	630427	631584	1158	+	FIG00512525	PLF_1573_00000025	PGF_01251522		385		FIG00512526: hypothetical protein
Clavibacter michiganensis strain PF008	28447.7	CP012573	fig|28447.7.peg.646	AES38_03175		PATRIC.28447.7.CP012573.CDS.631581.632378.fwd	PATRIC	CDS	631581	632378	798	+	FIG01030897	PLF_1573_00001043	PGF_00409379		265		putative membrane protein
Clavibacter michiganensis strain PF008	28447.7	CP012573	fig|28447.7.peg.647	AES38_03180		PATRIC.28447.7.CP012573.CDS.632375.633115.fwd	PATRIC	CDS	632375	633115	741	+	FIG01247796	PLF_1573_00001642	PGF_00033003		246		Phenazine biosynthesis protein PhzF like
Clavibacter michiganensis strain PF008	28447.7	CP012573	fig|28447.7.peg.648	AES38_03185		PATRIC.28447.7.CP012573.CDS.633143.634456.rev	PATRIC	CDS	633143	634456	1314	-	FIG00936959	PLF_1573_00001220	PGF_00011509		437		Hemolysins and related proteins containing CBS domains
Clavibacter michiganensis strain PF008	28447.7	CP012573	fig|28447.7.peg.649			PATRIC.28447.7.CP012573.CDS.634453.634617.rev	PATRIC	CDS	634453	634617	165	-					54		hypothetical protein
Clavibacter michiganensis strain PF008	28447.7	CP012573	fig|28447.7.peg.650	AES38_03190		PATRIC.28447.7.CP012573.CDS.634683.635108.fwd	PATRIC	CDS	634683	635108	426	+	FIG00511937	PLF_1573_00000898	PGF_00078181		141		FIG00511938: hypothetical protein
Clavibacter michiganensis strain PF008	28447.7	CP012573	fig|28447.7.peg.651	AES38_03195		PATRIC.28447.7.CP012573.CDS.635195.635971.rev	PATRIC	CDS	635195	635971	777	-	FIG00003788	PLF_1573_00000140	PGF_00009557		258		Glycosyl transferase, group 2 family
Clavibacter michiganensis strain PF008	28447.7	CP012573	fig|28447.7.peg.652	AES38_03200		PATRIC.28447.7.CP012573.CDS.635968.638562.rev	PATRIC	CDS	635968	638562	2595	-		PLF_1573_00000441	PGF_00033027		864		Acyl-CoA dehydrogenase/oxidase domain protein
Clavibacter michiganensis strain PF008	28447.7	CP012573	fig|28447.7.peg.653			PATRIC.28447.7.CP012573.CDS.638563.638766.fwd	PATRIC	CDS	638563	638766	204	+			PGF_00280782		67		hypothetical protein
Clavibacter michiganensis strain PF008	28447.7	CP012573	fig|28447.7.peg.654	AES38_03205		PATRIC.28447.7.CP012573.CDS.638821.639045.fwd	PATRIC	CDS	638821	639045	225	+	FIG00511172	PLF_1573_00002042	PGF_01251382		74		FIG00511173: hypothetical protein
Clavibacter michiganensis strain PF008	28447.7	CP012573	fig|28447.7.peg.655	AES38_03210		PATRIC.28447.7.CP012573.CDS.639090.640010.rev	PATRIC	CDS	639090	640010	921	-	FIG00000195	PLF_1573_00001661	PGF_00033936		306		Phosphoribosylaminoimidazole-succinocarboxamide synthase (EC 6.3.2.6)
Clavibacter michiganensis strain PF008	28447.7	CP012573	fig|28447.7.peg.656	AES38_03215		PATRIC.28447.7.CP012573.CDS.640007.641257.rev	PATRIC	CDS	640007	641257	1251	-	FIG00000235	PLF_1573_00001660	PGF_00033929		416		Phosphoribosylamine--glycine ligase (EC 6.3.4.13)
Clavibacter michiganensis strain PF008	28447.7	CP012573	fig|28447.7.peg.657	AES38_03220		PATRIC.28447.7.CP012573.CDS.641636.642016.fwd	PATRIC	CDS	641636	642016	381	+	FIG00511330	PLF_1573_00001404	PGF_00000576		126		FIG00820565: hypothetical protein
Clavibacter michiganensis strain PF008	28447.7	CP012573	fig|28447.7.peg.658	AES38_03225		PATRIC.28447.7.CP012573.CDS.642096.642404.fwd	PATRIC	CDS	642096	642404	309	+	FIG00511984	PLF_1573_00000081	PGF_01253322		102		FIG00511985: hypothetical protein
Clavibacter michiganensis strain PF008	28447.7	CP012573	fig|28447.7.peg.659	AES38_03230		PATRIC.28447.7.CP012573.CDS.642435.643895.rev	PATRIC	CDS	642435	643895	1461	-	FIG00000179	PLF_1573_00000476	PGF_00050995		486		Amidophosphoribosyltransferase (EC 2.4.2.14)
Clavibacter michiganensis strain PF008	28447.7	CP012573	fig|28447.7.peg.660	AES38_03235		PATRIC.28447.7.CP012573.CDS.643986.645095.fwd	PATRIC	CDS	643986	645095	1110	+	FIG00000222	PLF_1573_00002461	PGF_00033954		369		Phosphoribosylformylglycinamidine cyclo-ligase (EC 6.3.3.1)
Clavibacter michiganensis strain PF008	28447.7	CP012573	fig|28447.7.peg.661	AES38_03240		PATRIC.28447.7.CP012573.CDS.645231.645440.rev	PATRIC	CDS	645231	645440	210	-	FIG00638284	PLF_1573_00001077	PGF_00159267		69		hypothetical protein
Clavibacter michiganensis strain PF008	28447.7	CP012573	fig|28447.7.peg.662	AES38_03245		PATRIC.28447.7.CP012573.CDS.645648.646778.fwd	PATRIC	CDS	645648	646778	1131	+	FIG01340419	PLF_1573_00001304	PGF_00005689		376		Flavine-dependent monooxygenase
Clavibacter michiganensis strain PF008	28447.7	CP012573	fig|28447.7.peg.663	AES38_03250		PATRIC.28447.7.CP012573.CDS.647084.647647.rev	PATRIC	CDS	647084	647647	564	-	FIG00638284	PLF_1573_00003027	PGF_01251718		187		hypothetical protein
Clavibacter michiganensis strain PF008	28447.7	CP012573	fig|28447.7.peg.664	AES38_03255		PATRIC.28447.7.CP012573.CDS.647644.648063.rev	PATRIC	CDS	647644	648063	420	-		PLF_1573_00004435	PGF_00276580		139		FIG00544230: hypothetical protein
Clavibacter michiganensis strain PF008	28447.7	CP012573	fig|28447.7.peg.665			PATRIC.28447.7.CP012573.CDS.648060.648935.rev	PATRIC	CDS	648060	648935	876	-	FIG00638284	PLF_1573_00002625	PGF_00251055		291		hypothetical protein
Clavibacter michiganensis strain PF008	28447.7	CP012573	fig|28447.7.peg.666	AES38_03265		PATRIC.28447.7.CP012573.CDS.649092.651149.rev	PATRIC	CDS	649092	651149	2058	-	FIG00945276	PLF_1573_00001042	PGF_00409656		685		putative membrane protein
Clavibacter michiganensis strain PF008	28447.7	CP012573	fig|28447.7.peg.667	AES38_03270		PATRIC.28447.7.CP012573.CDS.651237.651902.rev	PATRIC	CDS	651237	651902	666	-	FIG00761799	PLF_1573_00001031	PGF_00407457		221		putative integral membrane protein
Clavibacter michiganensis strain PF008	28447.7	CP012573	fig|28447.7.peg.668	AES38_03275		PATRIC.28447.7.CP012573.CDS.651965.653413.fwd	PATRIC	CDS	651965	653413	1449	+	FIG00005520	PLF_1573_00002366	PGF_00010248		482		GntR family transcriptional regulator MSMEG2324 @ Transcriptional regulator, GntR family domain
Clavibacter michiganensis strain PF008	28447.7	CP012573	fig|28447.7.peg.669	AES38_03280		PATRIC.28447.7.CP012573.CDS.653605.654582.fwd	PATRIC	CDS	653605	654582	978	+	FIG00905474	PLF_1573_00002239	PGF_01251476		325		putative secreted protein
Clavibacter michiganensis strain PF008	28447.7	CP012573	fig|28447.7.peg.670	AES38_03285		PATRIC.28447.7.CP012573.CDS.654695.656776.fwd	PATRIC	CDS	654695	656776	2082	+	FIG00109688	PLF_1573_00000049	PGF_00008870		693		Glycogen debranching enzyme (EC 3.2.1.-)
Clavibacter michiganensis strain PF008	28447.7	CP012573	fig|28447.7.peg.671	AES38_03290		PATRIC.28447.7.CP012573.CDS.656904.657959.fwd	PATRIC	CDS	656904	657959	1056	+	FIG00511686	PLF_1573_00002219	PGF_00409054		351		putative membrane protein
Clavibacter michiganensis strain PF008	28447.7	CP012573	fig|28447.7.peg.672	AES38_03295		PATRIC.28447.7.CP012573.CDS.657956.658354.rev	PATRIC	CDS	657956	658354	399	-	FIG00511466	PLF_1573_00002041	PGF_01251381		132		FIG00511467: hypothetical protein
Clavibacter michiganensis strain PF008	28447.7	CP012573	fig|28447.7.peg.673	AES38_03300		PATRIC.28447.7.CP012573.CDS.658619.659725.fwd	PATRIC	CDS	658619	659725	1107	+					368		hypothetical protein
Clavibacter michiganensis strain PF008	28447.7	CP012573	fig|28447.7.peg.674	AES38_03305		PATRIC.28447.7.CP012573.CDS.659722.660876.fwd	PATRIC	CDS	659722	660876	1155	+	FIG00638284				384		hypothetical protein
Clavibacter michiganensis strain PF008	28447.7	CP012573	fig|28447.7.peg.675			PATRIC.28447.7.CP012573.CDS.661400.661783.fwd	PATRIC	CDS	661400	661783	384	+					127		hypothetical protein
Clavibacter michiganensis strain PF008	28447.7	CP012573	fig|28447.7.peg.676			PATRIC.28447.7.CP012573.CDS.661816.662880.fwd	PATRIC	CDS	661816	662880	1065	+	FIG00638284				354		hypothetical protein
Clavibacter michiganensis strain PF008	28447.7	CP012573	fig|28447.7.peg.677			PATRIC.28447.7.CP012573.CDS.662966.663547.fwd	PATRIC	CDS	662966	663547	582	+	FIG00638284				193		hypothetical protein
Clavibacter michiganensis strain PF008	28447.7	CP012573	fig|28447.7.peg.678			PATRIC.28447.7.CP012573.CDS.663774.663950.fwd	PATRIC	CDS	663774	663950	177	+					58		hypothetical protein
Clavibacter michiganensis strain PF008	28447.7	CP012573	fig|28447.7.peg.679	AES38_03335		PATRIC.28447.7.CP012573.CDS.664647.665309.rev	PATRIC	CDS	664647	665309	663	-					220		hypothetical protein
Clavibacter michiganensis strain PF008	28447.7	CP012573	fig|28447.7.peg.680	AES38_03340		PATRIC.28447.7.CP012573.CDS.665306.666532.rev	PATRIC	CDS	665306	666532	1227	-	FIG00638284				408		hypothetical protein
Clavibacter michiganensis strain PF008	28447.7	CP012573	fig|28447.7.peg.681	AES38_03345		PATRIC.28447.7.CP012573.CDS.666529.667566.rev	PATRIC	CDS	666529	667566	1038	-	FIG00022300		PGF_00064074		345		UDP-glucose 4-epimerase (EC 5.1.3.2)
Clavibacter michiganensis strain PF008	28447.7	CP012573	fig|28447.7.peg.682	AES38_03350		PATRIC.28447.7.CP012573.CDS.667812.668210.rev	PATRIC	CDS	667812	668210	399	-	FIG00512383	PLF_1573_00002624	PGF_00251055		132		FIG00512384: hypothetical protein
Clavibacter michiganensis strain PF008	28447.7	CP012573	fig|28447.7.peg.683	AES38_03355		PATRIC.28447.7.CP012573.CDS.668195.671641.fwd	PATRIC	CDS	668195	671641	3447	+	FIG00132942	PLF_1573_00000061	PGF_00046759		1148		RND multidrug efflux transporter; Acriflavin resistance protein
Clavibacter michiganensis strain PF008	28447.7	CP012573	fig|28447.7.peg.684	AES38_03360		PATRIC.28447.7.CP012573.CDS.671970.674153.fwd	PATRIC	CDS	671970	674153	2184	+	FIG00001381	PLF_1573_00000182	PGF_00017259		727		ATP-dependent RNA helicase
Clavibacter michiganensis strain PF008	28447.7	CP012573	fig|28447.7.peg.685	AES38_03365		PATRIC.28447.7.CP012573.CDS.674252.674782.fwd	PATRIC	CDS	674252	674782	531	+	FIG00000756	PLF_1573_00002496	PGF_00048882		176		Ribosomal-protein-S5p-alanine acetyltransferase (EC 2.3.1.128)
Clavibacter michiganensis strain PF008	28447.7	CP012573	fig|28447.7.peg.686	AES38_03370		PATRIC.28447.7.CP012573.CDS.674790.675305.fwd	PATRIC	CDS	674790	675305	516	+	FIG01272034	PLF_1573_00001572	PGF_00024018		171		N-acetyltransferase, GCN5-family
Clavibacter michiganensis strain PF008	28447.7	CP012573	fig|28447.7.peg.687	AES38_03375		PATRIC.28447.7.CP012573.CDS.675417.676376.fwd	PATRIC	CDS	675417	676376	960	+	FIG00014777	PLF_1573_00002380	PGF_00426572		319		5-keto-2-deoxygluconokinase (EC 2.7.1.92)
Clavibacter michiganensis strain PF008	28447.7	CP012573	fig|28447.7.peg.688	AES38_03380		PATRIC.28447.7.CP012573.CDS.676373.677314.fwd	PATRIC	CDS	676373	677314	942	+	FIG00019106	PLF_1573_00002302	PGF_00426560		313		5-keto-2-deoxy-D-gluconate-6 phosphate aldolase [form 2] (EC 4.1.2.29)
Clavibacter michiganensis strain PF008	28447.7	CP012573	fig|28447.7.peg.689	AES38_03385		PATRIC.28447.7.CP012573.CDS.677366.678871.fwd	PATRIC	CDS	677366	678871	1506	+	FIG01257503	PLF_1573_00002420	PGF_00021001		501		Methylmalonate-semialdehyde dehydrogenase [inositol] (EC 1.2.1.27)
Clavibacter michiganensis strain PF008	28447.7	CP012573	fig|28447.7.peg.690	AES38_03390		PATRIC.28447.7.CP012573.CDS.678917.679870.fwd	PATRIC	CDS	678917	679870	954	+	FIG00001409	PLF_1573_00001140	PGF_00426473		317		5-deoxy-glucuronate isomerase (EC 5.3.1.-)
Clavibacter michiganensis strain PF008	28447.7	CP012573	fig|28447.7.peg.691	AES38_03395		PATRIC.28447.7.CP012573.CDS.679867.681783.fwd	PATRIC	CDS	679867	681783	1917	+	FIG00029868	PLF_1573_00001192	PGF_00424627		638		Epi-inositol hydrolase (EC 3.7.1.-)
Clavibacter michiganensis strain PF008	28447.7	CP012573	fig|28447.7.peg.692	AES38_03400		PATRIC.28447.7.CP012573.CDS.681870.682199.rev	PATRIC	CDS	681870	682199	330	-		PLF_1573_00003053	PGF_01251738		109		hypothetical protein
Clavibacter michiganensis strain PF008	28447.7	CP012573	fig|28447.7.peg.693			PATRIC.28447.7.CP012573.CDS.682263.682433.rev	PATRIC	CDS	682263	682433	171	-		PLF_1573_00003053	PGF_01251738		56		hypothetical protein
Clavibacter michiganensis strain PF008	28447.7	CP012573	fig|28447.7.peg.694	AES38_03405		PATRIC.28447.7.CP012573.CDS.682559.683536.fwd	PATRIC	CDS	682559	683536	978	+	FIG01322202	PLF_1573_00002033	PGF_00289407		325		MISCELLANEOUS; Unknown
Clavibacter michiganensis strain PF008	28447.7	CP012573	fig|28447.7.peg.695	AES38_03410		PATRIC.28447.7.CP012573.CDS.683533.684498.fwd	PATRIC	CDS	683533	684498	966	+	FIG00000819	PLF_1573_00001113	PGF_00418720		321		3-hydroxybutyryl-CoA dehydrogenase (EC 1.1.1.157); 3-hydroxyacyl-CoA dehydrogenase (EC 1.1.1.35)
Clavibacter michiganensis strain PF008	28447.7	CP012573	fig|28447.7.peg.696	AES38_03415		PATRIC.28447.7.CP012573.CDS.684527.684874.rev	PATRIC	CDS	684527	684874	348	-					115		hypothetical protein
Clavibacter michiganensis strain PF008	28447.7	CP012573	fig|28447.7.peg.697			PATRIC.28447.7.CP012573.CDS.685337.685468.rev	PATRIC	CDS	685337	685468	132	-					43		hypothetical protein
Clavibacter michiganensis strain PF008	28447.7	CP012573	fig|28447.7.peg.698	AES38_03420		PATRIC.28447.7.CP012573.CDS.685627.686328.fwd	PATRIC	CDS	685627	686328	702	+	FIG00512202	PLF_1573_00000973	PGF_00251055		233		FIG00512203: hypothetical protein
Clavibacter michiganensis strain PF008	28447.7	CP012573	fig|28447.7.peg.699	AES38_03425		PATRIC.28447.7.CP012573.CDS.686366.687106.fwd	PATRIC	CDS	686366	687106	741	+	FIG00511907	PLF_1573_00000974	PGF_00251055		246		FIG00511908: hypothetical protein
Clavibacter michiganensis strain PF008	28447.7	CP012573	fig|28447.7.peg.700	AES38_03430		PATRIC.28447.7.CP012573.CDS.687120.687764.rev	PATRIC	CDS	687120	687764	645	-	FIG00638284	PLF_1573_00003601	PGF_01252064		214		hypothetical protein
Clavibacter michiganensis strain PF008	28447.7	CP012573	fig|28447.7.peg.701	AES38_03440		PATRIC.28447.7.CP012573.CDS.687909.688196.fwd	PATRIC	CDS	687909	688196	288	+		PLF_1573_00003600	PGF_01252063		95		hypothetical protein
Clavibacter michiganensis strain PF008	28447.7	CP012573	fig|28447.7.peg.702	AES38_03445		PATRIC.28447.7.CP012573.CDS.688213.689028.rev	PATRIC	CDS	688213	689028	816	-	FIG00638284	PLF_1573_00004243	PGF_01252507		271		hypothetical protein
Clavibacter michiganensis strain PF008	28447.7	CP012573	fig|28447.7.peg.703	AES38_03450		PATRIC.28447.7.CP012573.CDS.689055.690152.rev	PATRIC	CDS	689055	690152	1098	-	FIG00134441	PLF_1573_00002852	PGF_00004066		365		Fatty acid desaturase
Clavibacter michiganensis strain PF008	28447.7	CP012573	fig|28447.7.peg.704	AES38_03455		PATRIC.28447.7.CP012573.CDS.690489.690764.fwd	PATRIC	CDS	690489	690764	276	+		PLF_1573_00003621	PGF_01252074		91		hypothetical protein
Clavibacter michiganensis strain PF008	28447.7	CP012573	fig|28447.7.peg.705			PATRIC.28447.7.CP012573.CDS.690840.690956.rev	PATRIC	CDS	690840	690956	117	-		PLF_1573_00003237	PGF_01251868		38		hypothetical protein
Clavibacter michiganensis strain PF008	28447.7	CP012573	fig|28447.7.peg.706	AES38_03460		PATRIC.28447.7.CP012573.CDS.691008.691742.rev	PATRIC	CDS	691008	691742	735	-	FIG00621925	PLF_1573_00001876	PGF_00059269		244		Transcriptional regulator, GntR family
Clavibacter michiganensis strain PF008	28447.7	CP012573	fig|28447.7.peg.707	AES38_03465		PATRIC.28447.7.CP012573.CDS.691758.692567.rev	PATRIC	CDS	691758	692567	810	-	FIG00000076	PLF_1573_00001913	PGF_00061897		269		Triosephosphate isomerase (EC 5.3.1.1)
Clavibacter michiganensis strain PF008	28447.7	CP012573	fig|28447.7.peg.708	AES38_03470		PATRIC.28447.7.CP012573.CDS.692572.693033.rev	PATRIC	CDS	692572	693033	462	-	FIG00134342	PLF_1573_00000717	PGF_00048652		153		Ribose 5-phosphate isomerase B (EC 5.3.1.6)
Clavibacter michiganensis strain PF008	28447.7	CP012573	fig|28447.7.peg.709	AES38_03475		PATRIC.28447.7.CP012573.CDS.693089.694825.rev	PATRIC	CDS	693089	694825	1737	-	FIG00002488	PLF_1573_00000504	PGF_00423426		578		Dihydroxyacetone kinase, ATP-dependent (EC 2.7.1.29)
Clavibacter michiganensis strain PF008	28447.7	CP012573	fig|28447.7.peg.710	AES38_03480		PATRIC.28447.7.CP012573.CDS.694912.695505.rev	PATRIC	CDS	694912	695505	594	-	FIG00638284	PLF_1573_00002868	PGF_00024107		197		N-acetyltransferase, GCN5-family
Clavibacter michiganensis strain PF008	28447.7	CP012573	fig|28447.7.peg.711	AES38_03485		PATRIC.28447.7.CP012573.CDS.695546.696307.rev	PATRIC	CDS	695546	696307	762	-	FIG00621925	PLF_1573_00000782	PGF_00059269		253		Transcriptional regulator, GntR family
Clavibacter michiganensis strain PF008	28447.7	CP012573	fig|28447.7.peg.712	AES38_03490		PATRIC.28447.7.CP012573.CDS.696361.697272.rev	PATRIC	CDS	696361	697272	912	-	FIG00008439	PLF_1573_00000425	PGF_00014337		303		Inositol transport system ATP-binding protein
Clavibacter michiganensis strain PF008	28447.7	CP012573	fig|28447.7.peg.713	AES38_03495		PATRIC.28447.7.CP012573.CDS.697269.698312.rev	PATRIC	CDS	697269	698312	1044	-	FIG00008562	PLF_1573_00002511	PGF_00054681		347		Sugar ABC transporter, permease protein
Clavibacter michiganensis strain PF008	28447.7	CP012573	fig|28447.7.peg.714	AES38_03500		PATRIC.28447.7.CP012573.CDS.698384.699361.rev	PATRIC	CDS	698384	699361	978	-	FIG00008311	PLF_1573_00002395	PGF_00014373		325		Inositol transport system sugar-binding protein
Clavibacter michiganensis strain PF008	28447.7	CP012573	fig|28447.7.peg.715	AES38_03505		PATRIC.28447.7.CP012573.CDS.699614.700621.rev	PATRIC	CDS	699614	700621	1008	-	FIG01583289	PLF_1573_00002424	PGF_00023541		335		Myo-inositol 2-dehydrogenase (EC 1.1.1.18)
Clavibacter michiganensis strain PF008	28447.7	CP012573	fig|28447.7.peg.716	AES38_03510		PATRIC.28447.7.CP012573.CDS.700663.701580.rev	PATRIC	CDS	700663	701580	918	-	FIG00001357	PLF_1573_00001454	PGF_00014390		305		Inosose dehydratase (EC 4.2.1.44)
Clavibacter michiganensis strain PF008	28447.7	CP012573	fig|28447.7.peg.717			PATRIC.28447.7.CP012573.CDS.701577.703943.rev	PATRIC	CDS	701577	703943	2367	-	FIG00638284	PLF_1573_00001454	PGF_00014390		788		Inosose dehydratase (EC 4.2.1.44)
Clavibacter michiganensis strain PF008	28447.7	CP012573	fig|28447.7.peg.718	AES38_03520		PATRIC.28447.7.CP012573.CDS.704110.704511.fwd	PATRIC	CDS	704110	704511	402	+	FIG01318274	PLF_1573_00002769	PGF_00056736		133		Thioredoxin
Clavibacter michiganensis strain PF008	28447.7	CP012573	fig|28447.7.peg.719	AES38_03525		PATRIC.28447.7.CP012573.CDS.704614.706497.fwd	PATRIC	CDS	704614	706497	1884	+	FIG00000422	PLF_1573_00000180	PGF_00016645		627		ATP-dependent DNA helicase RecQ
Clavibacter michiganensis strain PF008	28447.7	CP012573	fig|28447.7.peg.720	AES38_03530		PATRIC.28447.7.CP012573.CDS.706851.708854.fwd	PATRIC	CDS	706851	708854	2004	+	FIG00511193	PLF_1573_00000669	PGF_00040959		667		Putative glycosyl hydrolase of unknown function (DUF1680)
Clavibacter michiganensis strain PF008	28447.7	CP012573	fig|28447.7.peg.721	AES38_03535		PATRIC.28447.7.CP012573.CDS.708999.710681.fwd	PATRIC	CDS	708999	710681	1683	+	FIG00816155	PLF_1573_00001154	PGF_00001294		560		ABC transport protein BldKB
Clavibacter michiganensis strain PF008	28447.7	CP012573	fig|28447.7.peg.722	AES38_03540		PATRIC.28447.7.CP012573.CDS.710685.711647.fwd	PATRIC	CDS	710685	711647	963	+	FIG00511882	PLF_1573_00002440	PGF_00026967		320		Oligopeptide ABC transporter, permease protein
Clavibacter michiganensis strain PF008	28447.7	CP012573	fig|28447.7.peg.723	AES38_03545		PATRIC.28447.7.CP012573.CDS.711644.712636.fwd	PATRIC	CDS	711644	712636	993	+	FIG01630694	PLF_1573_00003723	PGF_00409962		330		putative peptide ABC transporter, permease component
Clavibacter michiganensis strain PF008	28447.7	CP012573	fig|28447.7.peg.724			PATRIC.28447.7.CP012573.CDS.712633.713499.fwd	PATRIC	CDS	712633	713499	867	+	FIG00014907	PLF_1573_00000565	PGF_00026922		288		Oligopeptide ABC transporter, ATP-binding protein
Clavibacter michiganensis strain PF008	28447.7	CP012573	fig|28447.7.peg.725	AES38_03555		PATRIC.28447.7.CP012573.CDS.713496.714419.fwd	PATRIC	CDS	713496	714419	924	+	FIG00018865	PLF_1573_00000568	PGF_00026996		307		Oligopeptide transport ATP-binding protein OppF (TC 3.A.1.5.1)
Clavibacter michiganensis strain PF008	28447.7	CP012573	fig|28447.7.peg.726	AES38_03560		PATRIC.28447.7.CP012573.CDS.714416.715723.fwd	PATRIC	CDS	714416	715723	1308	+	FIG00000951	PLF_1573_00001687	PGF_00037533		435		Proline iminopeptidase (EC 3.4.11.5)
Clavibacter michiganensis strain PF008	28447.7	CP012573	fig|28447.7.peg.727	AES38_03565		PATRIC.28447.7.CP012573.CDS.715720.717168.fwd	PATRIC	CDS	715720	717168	1449	+	FIG00010600	PLF_1573_00001960	PGF_00066867		482		Xaa-Pro aminopeptidase (EC 3.4.11.9)
Clavibacter michiganensis strain PF008	28447.7	CP012573	fig|28447.7.peg.728	AES38_03570		PATRIC.28447.7.CP012573.CDS.717188.717901.fwd	PATRIC	CDS	717188	717901	714	+	FIG00002178	PLF_1573_00002521	PGF_00059269		237		Transcriptional regulator, GntR family
Clavibacter michiganensis strain PF008	28447.7	CP012573	fig|28447.7.peg.729	AES38_03575		PATRIC.28447.7.CP012573.CDS.718015.719226.fwd	PATRIC	CDS	718015	719226	1212	+	FIG00002178	PLF_1573_00000396	PGF_00420886		403		D-amino-acid oxidase (EC 1.4.3.3)
Clavibacter michiganensis strain PF008	28447.7	CP012573	fig|28447.7.peg.730	AES38_03580		PATRIC.28447.7.CP012573.CDS.719283.719564.fwd	PATRIC	CDS	719283	719564	282	+		PLF_1573_00000578	PGF_00027248		93		Opine oxidase subunit C
Clavibacter michiganensis strain PF008	28447.7	CP012573	fig|28447.7.peg.731	AES38_03585		PATRIC.28447.7.CP012573.CDS.720529.720978.rev	PATRIC	CDS	720529	720978	450	-	FIG00638284				149		hypothetical protein
Clavibacter michiganensis strain PF008	28447.7	CP012573	fig|28447.7.peg.732	AES38_03590		PATRIC.28447.7.CP012573.CDS.721149.722066.fwd	PATRIC	CDS	721149	722066	918	+	FIG00133510	PLF_1573_00000341	PGF_00426624		305		1-pyrroline-4-hydroxy-2-carboxylate deaminase (EC 3.5.4.22)
Clavibacter michiganensis strain PF008	28447.7	CP012573	fig|28447.7.peg.733	AES38_03595		PATRIC.28447.7.CP012573.CDS.722074.723075.fwd	PATRIC	CDS	722074	723075	1002	+	FIG00023542	PLF_1573_00001134	PGF_00424435		333		4-hydroxyproline epimerase (EC 5.1.1.8)
Clavibacter michiganensis strain PF008	28447.7	CP012573	fig|28447.7.peg.734	AES38_03600		PATRIC.28447.7.CP012573.CDS.723101.724600.fwd	PATRIC	CDS	723101	724600	1500	+	FIG00132790	PLF_1573_00000374	PGF_00036709		499		2,5-dioxovalerate dehydrogenase (EC 1.2.1.26)
Clavibacter michiganensis strain PF008	28447.7	CP012573	fig|28447.7.peg.735	AES38_03605		PATRIC.28447.7.CP012573.CDS.724760.726979.fwd	PATRIC	CDS	724760	726979	2220	+	FIG00731180	PLF_1573_00000132	PGF_00033866		739		Acyl-coenzyme A oxidase 1, peroxisomal (EC 1.3.3.6)
Clavibacter michiganensis strain PF008	28447.7	CP012573	fig|28447.7.peg.736	AES38_03610		PATRIC.28447.7.CP012573.CDS.726997.727608.rev	PATRIC	CDS	726997	727608	612	-	FIG00638284	PLF_1573_00002139	PGF_00195328		203		FIG00814951: hypothetical protein
Clavibacter michiganensis strain PF008	28447.7	CP012573	fig|28447.7.peg.737	AES38_03615		PATRIC.28447.7.CP012573.CDS.727664.728401.rev	PATRIC	CDS	727664	728401	738	-	FIG00512142	PLF_1573_00000323	PGF_01251861		245		GDSL-like Lipase/Acylhydrolase domain protein
Clavibacter michiganensis strain PF008	28447.7	CP012573	fig|28447.7.peg.738	AES38_03620		PATRIC.28447.7.CP012573.CDS.728601.729578.fwd	PATRIC	CDS	728601	729578	978	+	FIG00000951	PLF_1573_00001688	PGF_00037535		325		Proline iminopeptidase (EC 3.4.11.5)
Clavibacter michiganensis strain PF008	28447.7	CP012573	fig|28447.7.peg.739	AES38_03625		PATRIC.28447.7.CP012573.CDS.729618.730115.rev	PATRIC	CDS	729618	730115	498	-	FIG00035627	PLF_1573_00001093	PGF_00008599		165		Glycerol-3-phosphate cytidylyltransferase (EC 2.7.7.39)
Clavibacter michiganensis strain PF008	28447.7	CP012573	fig|28447.7.peg.740			PATRIC.28447.7.CP012573.CDS.730283.730744.rev	PATRIC	CDS	730283	730744	462	-			PGF_00251055		153		hypothetical protein
Clavibacter michiganensis strain PF008	28447.7	CP012573	fig|28447.7.peg.741			PATRIC.28447.7.CP012573.CDS.730735.730932.rev	PATRIC	CDS	730735	730932	198	-					65		hypothetical protein
Clavibacter michiganensis strain PF008	28447.7	CP012573	fig|28447.7.peg.742			PATRIC.28447.7.CP012573.CDS.730945.731325.rev	PATRIC	CDS	730945	731325	381	-	FIG00638284				126		hypothetical protein
Clavibacter michiganensis strain PF008	28447.7	CP012573	fig|28447.7.peg.743			PATRIC.28447.7.CP012573.CDS.731485.733110.fwd	PATRIC	CDS	731485	733110	1626	+	FIG00001347	PLF_1573_00000488	PGF_00417609		541		Chitinase (EC 3.2.1.14)
Clavibacter michiganensis strain PF008	28447.7	CP012573	fig|28447.7.peg.744	AES38_03635		PATRIC.28447.7.CP012573.CDS.733498.735042.fwd	PATRIC	CDS	733498	735042	1545	+	FIG00002968	PLF_1573_00001709	PGF_00041054		514		Putative glycosyltransferase
Clavibacter michiganensis strain PF008	28447.7	CP012573	fig|28447.7.peg.745	AES38_03640		PATRIC.28447.7.CP012573.CDS.735044.736276.fwd	PATRIC	CDS	735044	736276	1233	+	FIG00002463	PLF_1573_00001160	PGF_00046044		410		Alpha-D-GlcNAc alpha-1,2-L-rhamnosyltransferase (EC 2.4.1.-)
Clavibacter michiganensis strain PF008	28447.7	CP012573	fig|28447.7.peg.746	AES38_03645		PATRIC.28447.7.CP012573.CDS.736273.737079.fwd	PATRIC	CDS	736273	737079	807	+	FIG00512293	PLF_1573_00000687	PGF_00044510		268		Putative transferase
Clavibacter michiganensis strain PF008	28447.7	CP012573	fig|28447.7.peg.747	AES38_03650		PATRIC.28447.7.CP012573.CDS.737076.738317.fwd	PATRIC	CDS	737076	738317	1242	+	FIG01560076	PLF_1573_00000196	PGF_00009303		413		Glycosyl transferase, group 1
Clavibacter michiganensis strain PF008	28447.7	CP012573	fig|28447.7.peg.748	AES38_03655		PATRIC.28447.7.CP012573.CDS.738367.744267.fwd	PATRIC	CDS	738367	744267	5901	+		PLF_1573_00001376	PGF_00003977		1966		FOG: PKD repeat
Clavibacter michiganensis strain PF008	28447.7	CP012573	fig|28447.7.peg.749	AES38_03660		PATRIC.28447.7.CP012573.CDS.744498.745865.fwd	PATRIC	CDS	744498	745865	1368	+		PLF_1573_00000080	PGF_00337133		455		hypothetical protein
Clavibacter michiganensis strain PF008	28447.7	CP012573	fig|28447.7.peg.750	AES38_03665		PATRIC.28447.7.CP012573.CDS.745862.747250.fwd	PATRIC	CDS	745862	747250	1389	+	FIG00006955	PLF_1573_00000818	PGF_00063892		462		Tyrosine-protein kinase Wzc (EC 2.7.10.2)
Clavibacter michiganensis strain PF008	28447.7	CP012573	fig|28447.7.peg.751	AES38_03670		PATRIC.28447.7.CP012573.CDS.747366.748013.rev	PATRIC	CDS	747366	748013	648	-	FIG00638284	PLF_1573_00000895	PGF_01253361		215		hypothetical protein
Clavibacter michiganensis strain PF008	28447.7	CP012573	fig|28447.7.peg.752	AES38_03675		PATRIC.28447.7.CP012573.CDS.748213.750150.rev	PATRIC	CDS	748213	750150	1938	-	FIG00638284	PLF_1573_00000753	PGF_00054514		645		Succinoglycan biosynthesis protein exoM (EC 2.-.-.-)
Clavibacter michiganensis strain PF008	28447.7	CP012573	fig|28447.7.peg.753	AES38_03680		PATRIC.28447.7.CP012573.CDS.750289.751338.fwd	PATRIC	CDS	750289	751338	1050	+	FIG00036220	PLF_1573_00001312	PGF_00006739		349		GDP-mannose:glycolipid 4-beta-D-mannosyltransferase (EC 2.4.1.251)
Clavibacter michiganensis strain PF008	28447.7	CP012573	fig|28447.7.peg.754	AES38_03685		PATRIC.28447.7.CP012573.CDS.751520.753127.fwd	PATRIC	CDS	751520	753127	1608	+	FIG00638284	PLF_1573_00001347	PGF_00010368		535		GumJ protein
Clavibacter michiganensis strain PF008	28447.7	CP012573	fig|28447.7.peg.755	AES38_03690		PATRIC.28447.7.CP012573.CDS.753124.754416.rev	PATRIC	CDS	753124	754416	1293	-	FIG00475203	PLF_1573_00001100	PGF_00424200		430		Endo-1,4-beta-xylanase A precursor (EC 3.2.1.8)
Clavibacter michiganensis strain PF008	28447.7	CP012573	fig|28447.7.peg.756	AES38_03695		PATRIC.28447.7.CP012573.CDS.754672.755718.fwd	PATRIC	CDS	754672	755718	1047	+	FIG01529554	PLF_1573_00002712	PGF_00408520		348		putative mRNA-binding protein
Clavibacter michiganensis strain PF008	28447.7	CP012573	fig|28447.7.peg.757	AES38_03700		PATRIC.28447.7.CP012573.CDS.755752.756567.rev	PATRIC	CDS	755752	756567	816	-	FIG00511850	PLF_1573_00002637	PGF_00251055		271		FIG00511852: hypothetical protein
Clavibacter michiganensis strain PF008	28447.7	CP012573	fig|28447.7.peg.758	AES38_03710		PATRIC.28447.7.CP012573.CDS.757129.757875.fwd	PATRIC	CDS	757129	757875	747	+	FIG00638284	PLF_1573_00000099	PGF_00251055		248		hypothetical protein
Clavibacter michiganensis strain PF008	28447.7	CP012573	fig|28447.7.peg.759	AES38_03715		PATRIC.28447.7.CP012573.CDS.757895.759730.rev	PATRIC	CDS	757895	759730	1836	-	FIG00012589	PLF_1573_00000327	PGF_00007836		611		Glucoamylase (EC 3.2.1.3)
Clavibacter michiganensis strain PF008	28447.7	CP012573	fig|28447.7.peg.760	AES38_03720		PATRIC.28447.7.CP012573.CDS.760095.761258.fwd	PATRIC	CDS	760095	761258	1164	+	FIG00638284	PLF_1573_00003315	PGF_01251930		387		hypothetical protein
Clavibacter michiganensis strain PF008	28447.7	CP012573	fig|28447.7.peg.761	AES38_03725		PATRIC.28447.7.CP012573.CDS.761305.761838.fwd	PATRIC	CDS	761305	761838	534	+	FIG00004221		PGF_00026624		177		O-acetyl-ADP-ribose deacetylase
Clavibacter michiganensis strain PF008	28447.7	CP012573	fig|28447.7.peg.762	AES38_03745		PATRIC.28447.7.CP012573.CDS.762653.763948.fwd	PATRIC	CDS	762653	763948	1296	+	FIG01712719	PLF_1573_00001296	PGF_00020086		431		Membrane proteins related to metalloendopeptidases
Clavibacter michiganensis strain PF008	28447.7	CP012573	fig|28447.7.peg.763			PATRIC.28447.7.CP012573.CDS.763962.765047.fwd	PATRIC	CDS	763962	765047	1086	+	FIG00945273	PLF_1573_00003099	PGF_00290577		361		putative NPL/P60 family secreted protein
Clavibacter michiganensis strain PF008	28447.7	CP012573	fig|28447.7.peg.764	AES38_03760		PATRIC.28447.7.CP012573.CDS.765047.765319.fwd	PATRIC	CDS	765047	765319	273	+	FIG00945273	PLF_1573_00003099	PGF_00290577		90		putative NPL/P60 family secreted protein
Clavibacter michiganensis strain PF008	28447.7	CP012573	fig|28447.7.peg.765	AES38_03765		PATRIC.28447.7.CP012573.CDS.765403.765924.rev	PATRIC	CDS	765403	765924	522	-	FIG00000429	PLF_1573_00001449	PGF_00014306		173		Inorganic pyrophosphatase (EC 3.6.1.1)
Clavibacter michiganensis strain PF008	28447.7	CP012573	fig|28447.7.peg.766	AES38_03770		PATRIC.28447.7.CP012573.CDS.765979.767004.fwd	PATRIC	CDS	765979	767004	1026	+	FIG00000257	PLF_1573_00002247	PGF_00413308		341		tRNA(Ile)-lysidine synthetase (EC 6.3.4.19)
Clavibacter michiganensis strain PF008	28447.7	CP012573	fig|28447.7.peg.767	AES38_03775		PATRIC.28447.7.CP012573.CDS.767006.767557.fwd	PATRIC	CDS	767006	767557	552	+	FIG00000355	PLF_1573_00001440	PGF_00013491		183		Hypoxanthine-guanine phosphoribosyltransferase (EC 2.4.2.8)
Clavibacter michiganensis strain PF008	28447.7	CP012573	fig|28447.7.peg.768	AES38_03780		PATRIC.28447.7.CP012573.CDS.767716.769716.fwd	PATRIC	CDS	767716	769716	2001	+	FIG00018369	PLF_1573_00000355	PGF_00416947		666		Cell division protein FtsH (EC 3.4.24.-)
Clavibacter michiganensis strain PF008	28447.7	CP012573	fig|28447.7.peg.769	AES38_03785		PATRIC.28447.7.CP012573.CDS.769722.770312.fwd	PATRIC	CDS	769722	770312	591	+	FIG00000226	PLF_1573_00000324	PGF_00006973		196		GTP cyclohydrolase I (EC 3.5.4.16) type 1
Clavibacter michiganensis strain PF008	28447.7	CP012573	fig|28447.7.peg.770	AES38_03790		PATRIC.28447.7.CP012573.CDS.770309.771190.fwd	PATRIC	CDS	770309	771190	882	+	FIG00000307	PLF_1573_00000203	PGF_00423406		293		Dihydropteroate synthase (EC 2.5.1.15)
Clavibacter michiganensis strain PF008	28447.7	CP012573	fig|28447.7.peg.771	AES38_03795		PATRIC.28447.7.CP012573.CDS.771204.771905.fwd	PATRIC	CDS	771204	771905	702	+	FIG00638284	PLF_1573_00000094	PGF_01253391		233		hypothetical protein
Clavibacter michiganensis strain PF008	28447.7	CP012573	fig|28447.7.peg.772	AES38_03800		PATRIC.28447.7.CP012573.CDS.771899.772804.fwd	PATRIC	CDS	771899	772804	906	+	FIG00015180	PLF_1573_00000503	PGF_00423364		301		Dihydroneopterin aldolase (EC 4.1.2.25) / 2-amino-4-hydroxy-6-hydroxymethyldihydropteridine pyrophosphokinase (EC 2.7.6.3)
Clavibacter michiganensis strain PF008	28447.7	CP012573	fig|28447.7.peg.773	AES38_03805		PATRIC.28447.7.CP012573.CDS.772801.773283.fwd	PATRIC	CDS	772801	773283	483	+	FIG00511143	PLF_1573_00000363	PGF_00002934		160		FIG027937: secreted protein
Clavibacter michiganensis strain PF008	28447.7	CP012573	fig|28447.7.peg.774	AES38_03810		PATRIC.28447.7.CP012573.CDS.773307.773795.fwd	PATRIC	CDS	773307	773795	489	+	FIG00031962	PLF_1573_00001071	PGF_00413876		162		transmembrane protein, distant homology with ydbS
Clavibacter michiganensis strain PF008	28447.7	CP012573	fig|28447.7.peg.775	AES38_03815		PATRIC.28447.7.CP012573.CDS.773792.775624.fwd	PATRIC	CDS	773792	775624	1833	+	FIG00638284	PLF_1573_00002190	PGF_00401178		610		membrane-flanked domain
Clavibacter michiganensis strain PF008	28447.7	CP012573	fig|28447.7.peg.776	AES38_03820		PATRIC.28447.7.CP012573.CDS.775621.776382.fwd	PATRIC	CDS	775621	776382	762	+	FIG00506717	PLF_1573_00001240	PGF_00015857		253		Ketopantoate reductase PanG (EC 1.1.1.169)
Clavibacter michiganensis strain PF008	28447.7	CP012573	fig|28447.7.peg.777	AES38_03825		PATRIC.28447.7.CP012573.CDS.776424.777302.fwd	PATRIC	CDS	776424	777302	879	+	FIG00000440	PLF_1573_00001627	PGF_00029917		292		Pantoate--beta-alanine ligase (EC 6.3.2.1)
Clavibacter michiganensis strain PF008	28447.7	CP012573	fig|28447.7.peg.778	AES38_03830		PATRIC.28447.7.CP012573.CDS.777429.778964.fwd	PATRIC	CDS	777429	778964	1536	+	FIG00000300	PLF_1573_00000290	PGF_00018088		511		Lysyl-tRNA synthetase (class II) (EC 6.1.1.6)
Clavibacter michiganensis strain PF008	28447.7	CP012573	fig|28447.7.peg.779			PATRIC.28447.7.CP012573.CDS.778970.779095.fwd	PATRIC	CDS	778970	779095	126	+	FIG00638284	PLF_1573_00001012	PGF_01251260		41		hypothetical protein
Clavibacter michiganensis strain PF008	28447.7	CP012573	fig|28447.7.peg.780	AES38_03835		PATRIC.28447.7.CP012573.CDS.779117.779299.fwd	PATRIC	CDS	779117	779299	183	+	FIG00511574	PLF_1573_00001010	PGF_01251258		60		FIG00511576: hypothetical protein
Clavibacter michiganensis strain PF008	28447.7	CP012573	fig|28447.7.peg.781	AES38_03840		PATRIC.28447.7.CP012573.CDS.779453.781963.fwd	PATRIC	CDS	779453	781963	2511	+	FIG00011902	PLF_1573_00001499	PGF_00016441		836		ATP-dependent Clp protease, ATP-binding subunit ClpC / Negative regulator of genetic competence clcC/mecB
Clavibacter michiganensis strain PF008	28447.7	CP012573	fig|28447.7.peg.782	AES38_03845		PATRIC.28447.7.CP012573.CDS.782121.783008.fwd	PATRIC	CDS	782121	783008	888	+	FIG00022300	PLF_1573_00001943	PGF_00064074		295		UDP-glucose 4-epimerase (EC 5.1.3.2)
Clavibacter michiganensis strain PF008	28447.7	CP012573	fig|28447.7.peg.783	AES38_03850		PATRIC.28447.7.CP012573.CDS.783005.783982.fwd	PATRIC	CDS	783005	783982	978	+	FIG00945653	PLF_1573_00001953	PGF_00064860		325		Uncharacterized oxidoreductase, YajO family
Clavibacter michiganensis strain PF008	28447.7	CP012573	fig|28447.7.peg.784	AES38_03855		PATRIC.28447.7.CP012573.CDS.784284.784799.fwd	PATRIC	CDS	784284	784799	516	+	FIG00000159	PLF_1573_00002282	PGF_00016329		171		LSU ribosomal protein L10p (P0)
Clavibacter michiganensis strain PF008	28447.7	CP012573	fig|28447.7.peg.785	AES38_03860		PATRIC.28447.7.CP012573.CDS.784874.785257.fwd	PATRIC	CDS	784874	785257	384	+	FIG00000141	PLF_1573_00002283	PGF_00016445		127		LSU ribosomal protein L7/L12 (P1/P2)
Clavibacter michiganensis strain PF008	28447.7	CP012573	fig|28447.7.peg.786	AES38_03865		PATRIC.28447.7.CP012573.CDS.785387.785848.fwd	PATRIC	CDS	785387	785848	462	+	FIG00554610	PLF_1573_00000790	PGF_01253320		153		Transcriptional regulator, MarR family
Clavibacter michiganensis strain PF008	28447.7	CP012573	fig|28447.7.peg.787	AES38_03870		PATRIC.28447.7.CP012573.CDS.785939.787171.fwd	PATRIC	CDS	785939	787171	1233	+	FIG01313819	PLF_1573_00000298	PGF_00018631		410		Major facilitator family transporter
Clavibacter michiganensis strain PF008	28447.7	CP012573	fig|28447.7.peg.788	AES38_03875		PATRIC.28447.7.CP012573.CDS.787218.788237.rev	PATRIC	CDS	787218	788237	1020	-	FIG00026774	PLF_1573_00001861	PGF_00058491		339		Transcriptional regulator AglR, LacI family
Clavibacter michiganensis strain PF008	28447.7	CP012573	fig|28447.7.peg.789	AES38_03880		PATRIC.28447.7.CP012573.CDS.788553.789917.fwd	PATRIC	CDS	788553	789917	1365	+	FIG00020204	PLF_1573_00001474	PGF_00047937		454		Alpha-glucosides-binding periplasmic protein AglE precursor
Clavibacter michiganensis strain PF008	28447.7	CP012573	fig|28447.7.peg.790	AES38_03885		PATRIC.28447.7.CP012573.CDS.790042.791013.fwd	PATRIC	CDS	790042	791013	972	+	FIG00036219	PLF_1573_00001496	PGF_00000760		323		ABC alpha-glucoside transporter, inner membrane subunit AglF
Clavibacter michiganensis strain PF008	28447.7	CP012573	fig|28447.7.peg.791	AES38_03890		PATRIC.28447.7.CP012573.CDS.791010.791996.fwd	PATRIC	CDS	791010	791996	987	+	FIG00031150	PLF_1573_00000198	PGF_00047906		328		Alpha-glucoside transport system permease protein AglG
Clavibacter michiganensis strain PF008	28447.7	CP012573	fig|28447.7.peg.792	AES38_03895		PATRIC.28447.7.CP012573.CDS.792121.794001.fwd	PATRIC	CDS	792121	794001	1881	+	FIG00147713	PLF_1573_00000197	PGF_00047890		626		Alpha-glucoside transport ATP-binding protein AglK
Clavibacter michiganensis strain PF008	28447.7	CP012573	fig|28447.7.peg.793	AES38_03900		PATRIC.28447.7.CP012573.CDS.794075.794848.rev	PATRIC	CDS	794075	794848	774	-	FIG01122660	PLF_1573_00001059	PGF_00410675		257		putative secreted protein
Clavibacter michiganensis strain PF008	28447.7	CP012573	fig|28447.7.peg.794	AES38_03905		PATRIC.28447.7.CP012573.CDS.794851.795594.rev	PATRIC	CDS	794851	795594	744	-	FIG00511333	PLF_1573_00003170	PGF_00408978		247		putative membrane protein
Clavibacter michiganensis strain PF008	28447.7	CP012573	fig|28447.7.peg.795	AES38_03910		PATRIC.28447.7.CP012573.CDS.795764.797128.fwd	PATRIC	CDS	795764	797128	1365	+	FIG00022427	PLF_1573_00001393	PGF_00420017		454		Cystathionine beta-synthase (EC 4.2.1.22)
Clavibacter michiganensis strain PF008	28447.7	CP012573	fig|28447.7.peg.796	AES38_03915		PATRIC.28447.7.CP012573.CDS.797182.798354.fwd	PATRIC	CDS	797182	798354	1173	+	FIG00000660	PLF_1573_00000385	PGF_00420023		390		Cystathionine gamma-synthase (EC 2.5.1.48)
Clavibacter michiganensis strain PF008	28447.7	CP012573	fig|28447.7.peg.797	AES38_03920		PATRIC.28447.7.CP012573.CDS.798397.799149.rev	PATRIC	CDS	798397	799149	753	-	FIG00000542	PLF_1573_00000716	PGF_00048543		250		Ribonuclease HI (EC 3.1.26.4)
Clavibacter michiganensis strain PF008	28447.7	CP012573	fig|28447.7.peg.798	AES38_03925		PATRIC.28447.7.CP012573.CDS.799332.800354.fwd	PATRIC	CDS	799332	800354	1023	+	FIG00781023	PLF_1573_00002933	PGF_00059365		340		Transcriptional regulator, LacI family
Clavibacter michiganensis strain PF008	28447.7	CP012573	fig|28447.7.peg.799	AES38_03930		PATRIC.28447.7.CP012573.CDS.800522.802225.fwd	PATRIC	CDS	800522	802225	1704	+	FIG00002300	PLF_1573_00001777	PGF_00048963		567		Ribulokinase (EC 2.7.1.16)
Clavibacter michiganensis strain PF008	28447.7	CP012573	fig|28447.7.peg.800	AES38_03935		PATRIC.28447.7.CP012573.CDS.802222.802932.fwd	PATRIC	CDS	802222	802932	711	+	FIG00000986	PLF_1573_00000259	PGF_00016218		236		L-ribulose-5-phosphate 4-epimerase (EC 5.1.3.4)
Clavibacter michiganensis strain PF008	28447.7	CP012573	fig|28447.7.peg.801	AES38_03940		PATRIC.28447.7.CP012573.CDS.802929.804446.fwd	PATRIC	CDS	802929	804446	1518	+	FIG00002117	PLF_1573_00001242	PGF_00016028		505		L-arabinose isomerase (EC 5.3.1.4)
Clavibacter michiganensis strain PF008	28447.7	CP012573	fig|28447.7.peg.802	AES38_03945		PATRIC.28447.7.CP012573.CDS.804523.805656.fwd	PATRIC	CDS	804523	805656	1134	+	FIG00003299	PLF_1573_00001243	PGF_00016042		377		L-arabinose-binding periplasmic protein precursor AraF (TC 3.A.1.2.2)
Clavibacter michiganensis strain PF008	28447.7	CP012573	fig|28447.7.peg.803	AES38_03950		PATRIC.28447.7.CP012573.CDS.805831.807360.fwd	PATRIC	CDS	805831	807360	1530	+	FIG00003757	PLF_1573_00002340	PGF_00016031		509		L-arabinose transport ATP-binding protein AraG (TC 3.A.1.2.2)
Clavibacter michiganensis strain PF008	28447.7	CP012573	fig|28447.7.peg.804	AES38_03955		PATRIC.28447.7.CP012573.CDS.807366.808553.fwd	PATRIC	CDS	807366	808553	1188	+	FIG00004109	PLF_1573_00000255	PGF_00016035		395		L-arabinose transport system permease protein (TC 3.A.1.2.2)
Clavibacter michiganensis strain PF008	28447.7	CP012573	fig|28447.7.peg.805	AES38_03960		PATRIC.28447.7.CP012573.CDS.808762.809955.rev	PATRIC	CDS	808762	809955	1194	-	FIG00019456	PLF_1573_00001964	PGF_00067062		397		Xylose isomerase (EC 5.3.1.5)
Clavibacter michiganensis strain PF008	28447.7	CP012573	fig|28447.7.peg.806	AES38_03965		PATRIC.28447.7.CP012573.CDS.810162.811667.fwd	PATRIC	CDS	810162	811667	1506	+	FIG00001469	PLF_1573_00000843	PGF_00069015		501		beta-glucosidase (EC 3.2.1.21)
Clavibacter michiganensis strain PF008	28447.7	CP012573	fig|28447.7.peg.807	AES38_03970		PATRIC.28447.7.CP012573.CDS.811721.812230.fwd	PATRIC	CDS	811721	812230	510	+	FIG01106538	PLF_1573_00000720	PGF_00048882		169		Ribosomal-protein-S5p-alanine acetyltransferase (EC 2.3.1.128)
Clavibacter michiganensis strain PF008	28447.7	CP012573	fig|28447.7.peg.808	AES38_03975		PATRIC.28447.7.CP012573.CDS.812256.812693.rev	PATRIC	CDS	812256	812693	438	-	FIG00025887	PLF_1573_00001609	PGF_00027468		145		Organic hydroperoxide resistance transcriptional regulator
Clavibacter michiganensis strain PF008	28447.7	CP012573	fig|28447.7.peg.809	AES38_03980		PATRIC.28447.7.CP012573.CDS.812818.813153.rev	PATRIC	CDS	812818	813153	336	-	FIG00638284	PLF_1573_00003726	PGF_01252128		111		hypothetical protein
Clavibacter michiganensis strain PF008	28447.7	CP012573	fig|28447.7.peg.810	AES38_03985		PATRIC.28447.7.CP012573.CDS.813281.814237.rev	PATRIC	CDS	813281	814237	957	-		PLF_1573_00002937	PGF_00059484		318		Transcriptional regulator, LysR family
Clavibacter michiganensis strain PF008	28447.7	CP012573	fig|28447.7.peg.811	AES38_03990		PATRIC.28447.7.CP012573.CDS.814319.815413.fwd	PATRIC	CDS	814319	815413	1095	+	FIG00000001	PLF_1573_00001395	PGF_00420043		364		Cysteine desulfurase (EC 2.8.1.7)
Clavibacter michiganensis strain PF008	28447.7	CP012573	fig|28447.7.peg.812	AES38_03995		PATRIC.28447.7.CP012573.CDS.815468.816781.fwd	PATRIC	CDS	815468	816781	1314	+	FIG01121787	PLF_1573_00001479	PGF_00403047		437		Bicyclomycin resistance protein
Clavibacter michiganensis strain PF008	28447.7	CP012573	fig|28447.7.peg.813	AES38_04000		PATRIC.28447.7.CP012573.CDS.816822.817901.fwd	PATRIC	CDS	816822	817901	1080	+	FIG00512261	PLF_1573_00002224	PGF_00408638		359		putative membrane protein
Clavibacter michiganensis strain PF008	28447.7	CP012573	fig|28447.7.peg.814	AES38_04005		PATRIC.28447.7.CP012573.CDS.817996.818646.rev	PATRIC	CDS	817996	818646	651	-	FIG00511766	PLF_1573_00002613	PGF_01251555		216		FIG00511767: hypothetical protein
Clavibacter michiganensis strain PF008	28447.7	CP012573	fig|28447.7.peg.815	AES38_04015		PATRIC.28447.7.CP012573.CDS.819054.821846.rev	PATRIC	CDS	819054	821846	2793	-	FIG00512065	PLF_1573_00000772	PGF_00058213		930		Transcriptional regulator
Clavibacter michiganensis strain PF008	28447.7	CP012573	fig|28447.7.peg.816			PATRIC.28447.7.CP012573.CDS.821847.821984.fwd	PATRIC	CDS	821847	821984	138	+					45		hypothetical protein
Clavibacter michiganensis strain PF008	28447.7	CP012573	fig|28447.7.peg.817	AES38_04020		PATRIC.28447.7.CP012573.CDS.822245.822898.rev	PATRIC	CDS	822245	822898	654	-	FIG01327653	PLF_1573_00002193	PGF_00402270		217		oxidoreductase ylbE
Clavibacter michiganensis strain PF008	28447.7	CP012573	fig|28447.7.peg.818	AES38_04025		PATRIC.28447.7.CP012573.CDS.823130.825247.fwd	PATRIC	CDS	823130	825247	2118	+	FIG00000522	PLF_1573_00001515	PGF_00403653		705		BioD-like N-terminal domain / Phosphate acetyltransferase (EC 2.3.1.8)
Clavibacter michiganensis strain PF008	28447.7	CP012573	fig|28447.7.peg.819	AES38_04030		PATRIC.28447.7.CP012573.CDS.825316.826506.fwd	PATRIC	CDS	825316	826506	1191	+	FIG00067248	PLF_1573_00000186	PGF_00024567		396		Acetate kinase (EC 2.7.2.1)
Clavibacter michiganensis strain PF008	28447.7	CP012573	fig|28447.7.peg.820			PATRIC.28447.7.CP012573.CDS.826776.831482.fwd	PATRIC	CDS	826776	831482	4707	+	FIG00638284	PLF_1573_00000886	PGF_00251055		1568		Ccs1/ResB-related putative cytochrome C-type biogenesis protein
Clavibacter michiganensis strain PF008	28447.7	CP012573	fig|28447.7.peg.821	AES38_04040		PATRIC.28447.7.CP012573.CDS.831640.832488.fwd	PATRIC	CDS	831640	832488	849	+	FIG00512017	PLF_1573_00000887	PGF_00255719		282		FIG00512018: hypothetical protein
Clavibacter michiganensis strain PF008	28447.7	CP012573	fig|28447.7.peg.822	AES38_04045		PATRIC.28447.7.CP012573.CDS.832485.833687.fwd	PATRIC	CDS	832485	833687	1203	+	FIG00511499	PLF_1573_00000079	PGF_00131871		400		FIG00511500: hypothetical protein
Clavibacter michiganensis strain PF008	28447.7	CP012573	fig|28447.7.peg.823	AES38_04050		PATRIC.28447.7.CP012573.CDS.833713.836196.fwd	PATRIC	CDS	833713	836196	2484	+	FIG00000414	PLF_1573_00000497	PGF_00421591		827		DNA polymerase III subunits gamma and tau (EC 2.7.7.7)
Clavibacter michiganensis strain PF008	28447.7	CP012573	fig|28447.7.peg.824	AES38_04055		PATRIC.28447.7.CP012573.CDS.836203.836802.fwd	PATRIC	CDS	836203	836802	600	+	FIG00000190	PLF_1573_00001753	PGF_00047131		199		Recombination protein RecR
Clavibacter michiganensis strain PF008	28447.7	CP012573	fig|28447.7.peg.825	AES38_04060		PATRIC.28447.7.CP012573.CDS.836898.838163.fwd	PATRIC	CDS	836898	838163	1266	+	FIG00000132	PLF_1573_00001189	PGF_00067330		421		Aspartokinase (EC 2.7.2.4)
Clavibacter michiganensis strain PF008	28447.7	CP012573	fig|28447.7.peg.826	AES38_04065		PATRIC.28447.7.CP012573.CDS.838196.839290.fwd	PATRIC	CDS	838196	839290	1095	+	FIG00026137	PLF_1573_00001513	PGF_00067188		364		Aspartate-semialdehyde dehydrogenase (EC 1.2.1.11)
Clavibacter michiganensis strain PF008	28447.7	CP012573	fig|28447.7.peg.827	AES38_04070		PATRIC.28447.7.CP012573.CDS.839377.840855.fwd	PATRIC	CDS	839377	840855	1479	+	FIG00000978	PLF_1573_00001279	PGF_00018971		492		Malate:quinone oxidoreductase (EC 1.1.5.4)
Clavibacter michiganensis strain PF008	28447.7	CP012573	fig|28447.7.peg.828			PATRIC.28447.7.CP012573.CDS.840926.842353.fwd	PATRIC	CDS	840926	842353	1428	+	FIG00741867	PLF_1573_00000705	PGF_00047008		475		Radical SAM domain protein
Clavibacter michiganensis strain PF008	28447.7	CP012573	fig|28447.7.peg.829	AES38_04085		PATRIC.28447.7.CP012573.CDS.842902.843576.fwd	PATRIC	CDS	842902	843576	675	+	FIG00000655	PLF_1573_00001851	PGF_00056872		224		Thymidine kinase (EC 2.7.1.21)
Clavibacter michiganensis strain PF008	28447.7	CP012573	fig|28447.7.peg.830			PATRIC.28447.7.CP012573.CDS.843625.843717.rev	PATRIC	CDS	843625	843717	93	-		PLF_1573_00004819	PGF_01253028		30		hypothetical protein
Clavibacter michiganensis strain PF008	28447.7	CP012573	fig|28447.7.peg.831	AES38_04090		PATRIC.28447.7.CP012573.CDS.843952.845346.fwd	PATRIC	CDS	843952	845346	1395	+	FIG00006955	PLF_1573_00002199	PGF_00405721		464		putative ATPase involved in chromosome partitioning
Clavibacter michiganensis strain PF008	28447.7	CP012573	fig|28447.7.peg.832	AES38_04095		PATRIC.28447.7.CP012573.CDS.845674.846654.fwd	PATRIC	CDS	845674	846654	981	+	FIG00638284	PLF_1573_00002035	PGF_01251377		326		hypothetical protein
Clavibacter michiganensis strain PF008	28447.7	CP012573	fig|28447.7.peg.833	AES38_04100		PATRIC.28447.7.CP012573.CDS.846753.848471.fwd	PATRIC	CDS	846753	848471	1719	+	FIG00511680	PLF_1573_00000520	PGF_00020861		572		Methyl-accepting chemotaxis protein
Clavibacter michiganensis strain PF008	28447.7	CP012573	fig|28447.7.peg.834	AES38_04105		PATRIC.28447.7.CP012573.CDS.848558.849148.fwd	PATRIC	CDS	848558	849148	591	+	FIG00638284	PLF_1573_00002121	PGF_01251428		196		hypothetical protein
Clavibacter michiganensis strain PF008	28447.7	CP012573	fig|28447.7.peg.835	AES38_04110		PATRIC.28447.7.CP012573.CDS.849405.849995.fwd	PATRIC	CDS	849405	849995	591	+	FIG00512278	PLF_1573_00001290	PGF_01251294		196		Membrane glycoprotein
Clavibacter michiganensis strain PF008	28447.7	CP012573	fig|28447.7.peg.836	AES38_04115		PATRIC.28447.7.CP012573.CDS.850035.850574.rev	PATRIC	CDS	850035	850574	540	-	FIG00638284	PLF_1573_00000888	PGF_01253358		179		hypothetical protein
Clavibacter michiganensis strain PF008	28447.7	CP012573	fig|28447.7.peg.837	AES38_04120		PATRIC.28447.7.CP012573.CDS.850644.851675.fwd	PATRIC	CDS	850644	851675	1032	+	FIG00554275	PLF_1573_00002036	PGF_00129398		343		Luciferase-like monooxygenase (EC 1.14.-.-)
Clavibacter michiganensis strain PF008	28447.7	CP012573	fig|28447.7.peg.838	AES38_04125		PATRIC.28447.7.CP012573.CDS.851768.854014.fwd	PATRIC	CDS	851768	854014	2247	+	FIG00000011	PLF_1573_00001560	PGF_00023294		748		Multimodular transpeptidase-transglycosylase (EC 2.4.1.129) (EC 3.4.-.-)
Clavibacter michiganensis strain PF008	28447.7	CP012573	fig|28447.7.peg.839	AES38_04130		PATRIC.28447.7.CP012573.CDS.854160.855365.fwd	PATRIC	CDS	854160	855365	1206	+	FIG00511733	PLF_1573_00000135	PGF_00034379		401		Acyltransferase
Clavibacter michiganensis strain PF008	28447.7	CP012573	fig|28447.7.peg.840	AES38_04140		PATRIC.28447.7.CP012573.CDS.855625.856569.rev	PATRIC	CDS	855625	856569	945	-	FIG00905474	PLF_1573_00002238	PGF_00410644		314		putative secreted protein
Clavibacter michiganensis strain PF008	28447.7	CP012573	fig|28447.7.peg.841	AES38_04145		PATRIC.28447.7.CP012573.CDS.856569.859109.rev	PATRIC	CDS	856569	859109	2541	-	FIG00000011	PLF_1573_00000538	PGF_00023294		846		Multimodular transpeptidase-transglycosylase (EC 2.4.1.129) (EC 3.4.-.-)
Clavibacter michiganensis strain PF008	28447.7	CP012573	fig|28447.7.peg.842	AES38_04150		PATRIC.28447.7.CP012573.CDS.859216.859395.fwd	PATRIC	CDS	859216	859395	180	+	FIG00011121	PLF_1573_00001414	PGF_00001738		59		FIG011121: hypothetical protein
Clavibacter michiganensis strain PF008	28447.7	CP012573	fig|28447.7.peg.843	AES38_04155		PATRIC.28447.7.CP012573.CDS.859395.859859.fwd	PATRIC	CDS	859395	859859	465	+		PLF_1573_00000722	PGF_00049022		154		RidA/YER057c/UK114 superfamily, group 1
Clavibacter michiganensis strain PF008	28447.7	CP012573	fig|28447.7.peg.844	AES38_04160		PATRIC.28447.7.CP012573.CDS.859936.861969.rev	PATRIC	CDS	859936	861969	2034	-	FIG00022631	PLF_1573_00000189	PGF_00026104		677		Acetyl-CoA synthetase (EC 6.2.1.1)
Clavibacter michiganensis strain PF008	28447.7	CP012573	fig|28447.7.peg.845	AES38_04165		PATRIC.28447.7.CP012573.CDS.862546.863622.fwd	PATRIC	CDS	862546	863622	1077	+	FIG00014856	PLF_1573_00000316	PGF_00006046		358		Flp pilus assembly protein, ATPase CpaF
Clavibacter michiganensis strain PF008	28447.7	CP012573	fig|28447.7.peg.846	AES38_04170		PATRIC.28447.7.CP012573.CDS.863619.864623.fwd	PATRIC	CDS	863619	864623	1005	+	FIG01956050	PLF_1573_00000435	PGF_00014698		334		Integral membrane protein
Clavibacter michiganensis strain PF008	28447.7	CP012573	fig|28447.7.peg.847	AES38_04175		PATRIC.28447.7.CP012573.CDS.864749.865216.fwd	PATRIC	CDS	864749	865216	468	+	FIG00638284	PLF_1573_00000889	PGF_00248172		155		hypothetical protein
Clavibacter michiganensis strain PF008	28447.7	CP012573	fig|28447.7.peg.848	AES38_04180		PATRIC.28447.7.CP012573.CDS.865321.865626.fwd	PATRIC	CDS	865321	865626	306	+	FIG00638284	PLF_1573_00002257	PGF_01251484		101		hypothetical protein
Clavibacter michiganensis strain PF008	28447.7	CP012573	fig|28447.7.peg.849	AES38_04185		PATRIC.28447.7.CP012573.CDS.865649.865975.fwd	PATRIC	CDS	865649	865975	327	+		PLF_1573_00003557	PGF_01252037		108		Membrane-spanning protein
Clavibacter michiganensis strain PF008	28447.7	CP012573	fig|28447.7.peg.850	AES38_04190		PATRIC.28447.7.CP012573.CDS.866176.869136.fwd	PATRIC	CDS	866176	869136	2961	+	FIG00000204	PLF_1573_00000408	PGF_00421862		986		DNA topoisomerase I (EC 5.99.1.2)
Clavibacter michiganensis strain PF008	28447.7	CP012573	fig|28447.7.peg.851	AES38_04195		PATRIC.28447.7.CP012573.CDS.869133.869768.fwd	PATRIC	CDS	869133	869768	636	+	FIG00000175	PLF_1573_00001852	PGF_00056882		211		Thymidylate kinase (EC 2.7.4.9)
Clavibacter michiganensis strain PF008	28447.7	CP012573	fig|28447.7.peg.852	AES38_04200		PATRIC.28447.7.CP012573.CDS.869765.870994.fwd	PATRIC	CDS	869765	870994	1230	+	FIG00057709	PLF_1573_00000401	PGF_00421516		409		DNA polymerase III delta prime subunit (EC 2.7.7.7)
Clavibacter michiganensis strain PF008	28447.7	CP012573	fig|28447.7.peg.853	AES38_04205		PATRIC.28447.7.CP012573.CDS.870991.872568.fwd	PATRIC	CDS	870991	872568	1578	+	FIG01370638	PLF_1573_00000657	PGF_00038827		525		Proteinase
Clavibacter michiganensis strain PF008	28447.7	CP012573	fig|28447.7.peg.854	AES38_04215		PATRIC.28447.7.CP012573.CDS.872912.874408.fwd	PATRIC	CDS	872912	874408	1497	+	FIG00561498	PLF_1573_00001409	PGF_00420831		498		D-alanyl-D-alanine carboxypeptidase (EC 3.4.16.4)
Clavibacter michiganensis strain PF008	28447.7	CP012573	fig|28447.7.peg.855	AES38_04220		PATRIC.28447.7.CP012573.CDS.874473.875063.fwd	PATRIC	CDS	874473	875063	591	+	FIG00067300	PLF_1573_00001593	PGF_00025564		196		Nicotinamidase (EC 3.5.1.19)
Clavibacter michiganensis strain PF008	28447.7	CP012573	fig|28447.7.peg.856	AES38_04225		PATRIC.28447.7.CP012573.CDS.875113.876588.fwd	PATRIC	CDS	875113	876588	1476	+	FIG01958943	PLF_1573_00001828	PGF_00054489		491		Succinate-semialdehyde dehydrogenase [NAD(P)+] (EC 1.2.1.16)
Clavibacter michiganensis strain PF008	28447.7	CP012573	fig|28447.7.peg.857	AES38_04230		PATRIC.28447.7.CP012573.CDS.876588.877400.fwd	PATRIC	CDS	876588	877400	813	+	FIG01028897	PLF_1573_00000704	PGF_00046825		270		RRNA methylase family protein
Clavibacter michiganensis strain PF008	28447.7	CP012573	fig|28447.7.peg.858	AES38_04235		PATRIC.28447.7.CP012573.CDS.877489.877857.fwd	PATRIC	CDS	877489	877857	369	+	FIG00512609	PLF_1573_00002037	PGF_01251378		122		FIG00512610: hypothetical protein
Clavibacter michiganensis strain PF008	28447.7	CP012573	fig|28447.7.peg.859	AES38_04240		PATRIC.28447.7.CP012573.CDS.877948.879885.rev	PATRIC	CDS	877948	879885	1938	-	FIG00511810	PLF_1573_00000202	PGF_00004049		645		ABC transporter, NBP/MSD fusion protein
Clavibacter michiganensis strain PF008	28447.7	CP012573	fig|28447.7.peg.860	AES38_04245		PATRIC.28447.7.CP012573.CDS.880100.881026.fwd	PATRIC	CDS	880100	881026	927	+	FIG01124919	PLF_1573_00002787	PGF_00002731		308		ABC transporter related
Clavibacter michiganensis strain PF008	28447.7	CP012573	fig|28447.7.peg.861	AES38_04250		PATRIC.28447.7.CP012573.CDS.881023.881901.fwd	PATRIC	CDS	881023	881901	879	+	FIG00512277	PLF_1573_00001519	PGF_00416437		292		Carbohydrate efflux ABC transporter, permease protein, NodJ family
Clavibacter michiganensis strain PF008	28447.7	CP012573	fig|28447.7.peg.862	AES38_04255		PATRIC.28447.7.CP012573.CDS.881898.882746.fwd	PATRIC	CDS	881898	882746	849	+	FIG01042412	PLF_1573_00000450	PGF_01252725		282		Carbohydrate efflux ABC transporter, permease protein, NodJ family
Clavibacter michiganensis strain PF008	28447.7	CP012573	fig|28447.7.peg.863	AES38_04265		PATRIC.28447.7.CP012573.CDS.883086.883910.fwd	PATRIC	CDS	883086	883910	825	+	FIG00028476	PLF_1573_00000714	PGF_00048492		274		Ribokinase (EC 2.7.1.15)
Clavibacter michiganensis strain PF008	28447.7	CP012573	fig|28447.7.peg.864	AES38_04270		PATRIC.28447.7.CP012573.CDS.883916.884458.fwd	PATRIC	CDS	883916	884458	543	+		PLF_1573_00002748	PGF_01251632		180		hypothetical protein
Clavibacter michiganensis strain PF008	28447.7	CP012573	fig|28447.7.peg.865	AES38_04275		PATRIC.28447.7.CP012573.CDS.884430.884951.rev	PATRIC	CDS	884430	884951	522	-		PLF_1573_00002582	PGF_00282856		173		hypothetical protein
Clavibacter michiganensis strain PF008	28447.7	CP012573	fig|28447.7.peg.866	AES38_04280		PATRIC.28447.7.CP012573.CDS.885205.886461.fwd	PATRIC	CDS	885205	886461	1257	+	FIG00013626	PLF_1573_00002426	PGF_00023672		418		N-Acetyl-D-glucosamine ABC transport system, sugar-binding protein
Clavibacter michiganensis strain PF008	28447.7	CP012573	fig|28447.7.peg.867	AES38_04285		PATRIC.28447.7.CP012573.CDS.886465.887406.fwd	PATRIC	CDS	886465	887406	942	+	FIG00008591	PLF_1573_00002425	PGF_00023657		313		N-Acetyl-D-glucosamine ABC transport system, permease protein 1
Clavibacter michiganensis strain PF008	28447.7	CP012573	fig|28447.7.peg.868	AES38_04290		PATRIC.28447.7.CP012573.CDS.887418.888329.fwd	PATRIC	CDS	887418	888329	912	+	FIG00501923	PLF_1573_00001567	PGF_00023661		303		N-Acetyl-D-glucosamine ABC transport system, permease protein 2
Clavibacter michiganensis strain PF008	28447.7	CP012573	fig|28447.7.peg.869	AES38_04295		PATRIC.28447.7.CP012573.CDS.888362.890224.fwd	PATRIC	CDS	888362	890224	1863	+	FIG00001088	PLF_1573_00001514	PGF_00402021		620		Beta-hexosaminidase (EC 3.2.1.52)
Clavibacter michiganensis strain PF008	28447.7	CP012573	fig|28447.7.peg.870	AES38_04300		PATRIC.28447.7.CP012573.CDS.890310.891449.fwd	PATRIC	CDS	890310	891449	1140	+	FIG00638284	PLF_1573_00002372	PGF_00010750		379		HTH-type transcriptional regulator celR
Clavibacter michiganensis strain PF008	28447.7	CP012573	fig|28447.7.peg.871	AES38_04305		PATRIC.28447.7.CP012573.CDS.891456.891668.rev	PATRIC	CDS	891456	891668	213	-		PLF_1573_00002040	PGF_01251380		70		hypothetical membrane protein
Clavibacter michiganensis strain PF008	28447.7	CP012573	fig|28447.7.peg.872	AES38_04310		PATRIC.28447.7.CP012573.CDS.891665.892219.rev	PATRIC	CDS	891665	892219	555	-	FIG00511248	PLF_1573_00000293	PGF_00018386		184		MOSC domain protein
Clavibacter michiganensis strain PF008	28447.7	CP012573	fig|28447.7.peg.873	AES38_04315		PATRIC.28447.7.CP012573.CDS.892392.893795.rev	PATRIC	CDS	892392	893795	1404	-	FIG00815500	PLF_1573_00000515	PGF_01253283		467		Metabolite transport protein
Clavibacter michiganensis strain PF008	28447.7	CP012573	fig|28447.7.peg.874	AES38_04320		PATRIC.28447.7.CP012573.CDS.893900.895315.rev	PATRIC	CDS	893900	895315	1416	-	FIG00004275	PLF_1573_00000803	PGF_00061066		471		Transporter, MFS superfamily
Clavibacter michiganensis strain PF008	28447.7	CP012573	fig|28447.7.peg.875	AES38_04325		PATRIC.28447.7.CP012573.CDS.895503.896771.rev	PATRIC	CDS	895503	896771	1269	-	FIG00511294	PLF_1573_00001909	PGF_00061087		422		Transporter, MFS superfamily
Clavibacter michiganensis strain PF008	28447.7	CP012573	fig|28447.7.peg.876	AES38_04330		PATRIC.28447.7.CP012573.CDS.896956.897264.fwd	PATRIC	CDS	896956	897264	309	+					102		FIG00511695: hypothetical protein
Clavibacter michiganensis strain PF008	28447.7	CP012573	fig|28447.7.peg.877	AES38_04335		PATRIC.28447.7.CP012573.CDS.897293.897775.rev	PATRIC	CDS	897293	897775	483	-	FIG00000231	PLF_1573_00000462	PGF_00426932		160		6,7-dimethyl-8-ribityllumazine synthase (EC 2.5.1.78)
Clavibacter michiganensis strain PF008	28447.7	CP012573	fig|28447.7.peg.878	AES38_04340		PATRIC.28447.7.CP012573.CDS.897772.899130.rev	PATRIC	CDS	897772	899130	1359	-	FIG00000378	PLF_1573_00000124	PGF_00416674		452		3,4-dihydroxy-2-butanone 4-phosphate synthase (EC 4.1.99.12) / GTP cyclohydrolase II (EC 3.5.4.25)
Clavibacter michiganensis strain PF008	28447.7	CP012573	fig|28447.7.peg.879	AES38_04345		PATRIC.28447.7.CP012573.CDS.899127.899768.rev	PATRIC	CDS	899127	899768	642	-	FIG00000273	PLF_1573_00000712	PGF_00048480		213		Riboflavin synthase eubacterial/eukaryotic (EC 2.5.1.9)
Clavibacter michiganensis strain PF008	28447.7	CP012573	fig|28447.7.peg.880	AES38_04350		PATRIC.28447.7.CP012573.CDS.899768.900820.rev	PATRIC	CDS	899768	900820	1053	-	FIG00000384	PLF_1573_00001533	PGF_00423089		350		Diaminohydroxyphosphoribosylaminopyrimidine deaminase (EC 3.5.4.26) / 5-amino-6-(5-phosphoribosylamino)uracil reductase (EC 1.1.1.193)
Clavibacter michiganensis strain PF008	28447.7	CP012573	fig|28447.7.peg.881	AES38_04355		PATRIC.28447.7.CP012573.CDS.901101.901865.rev	PATRIC	CDS	901101	901865	765	-	FIG00001529	PLF_1573_00000115	PGF_00064023		254		2-haloalkanoic acid dehalogenase (EC 3.8.1.2)
Clavibacter michiganensis strain PF008	28447.7	CP012573	fig|28447.7.peg.882	AES38_04360		PATRIC.28447.7.CP012573.CDS.901862.902875.rev	PATRIC	CDS	901862	902875	1014	-	FIG00000055	PLF_1573_00001917	PGF_00062045		337		Tryptophanyl-tRNA synthetase (EC 6.1.1.2)
Clavibacter michiganensis strain PF008	28447.7	CP012573	fig|28447.7.peg.883	AES38_04365		PATRIC.28447.7.CP012573.CDS.902950.903795.rev	PATRIC	CDS	902950	903795	846	-	FIG00000065	PLF_1573_00002807	PGF_00425012		281		Exodeoxyribonuclease III (EC 3.1.11.2)
Clavibacter michiganensis strain PF008	28447.7	CP012573	fig|28447.7.peg.884	AES38_04370		PATRIC.28447.7.CP012573.CDS.903806.904930.rev	PATRIC	CDS	903806	904930	1125	-	FIG00672847	PLF_1573_00001027	PGF_00407697		374		putative integral membrane protein
Clavibacter michiganensis strain PF008	28447.7	CP012573	fig|28447.7.peg.885	AES38_04375		PATRIC.28447.7.CP012573.CDS.905089.906711.fwd	PATRIC	CDS	905089	906711	1623	+	FIG00028694	PLF_1573_00001651	PGF_00033423		540		Phosphoenolpyruvate-protein phosphotransferase of PTS system (EC 2.7.3.9)
Clavibacter michiganensis strain PF008	28447.7	CP012573	fig|28447.7.peg.886	AES38_04380		PATRIC.28447.7.CP012573.CDS.906790.907551.rev	PATRIC	CDS	906790	907551	762	-	FIG00026006	PLF_1573_00000752	PGF_00054481		253		Succinate dehydrogenase iron-sulfur protein (EC 1.3.5.1)
Clavibacter michiganensis strain PF008	28447.7	CP012573	fig|28447.7.peg.887	AES38_04385		PATRIC.28447.7.CP012573.CDS.907609.909432.rev	PATRIC	CDS	907609	909432	1824	-	FIG00136922	PLF_1573_00001826	PGF_00054470		607		Succinate dehydrogenase flavoprotein subunit (EC 1.3.5.1)
Clavibacter michiganensis strain PF008	28447.7	CP012573	fig|28447.7.peg.888	AES38_04390		PATRIC.28447.7.CP012573.CDS.909466.909942.rev	PATRIC	CDS	909466	909942	477	-	FIG00000807	PLF_1573_00001827	PGF_00054477		158		Succinate dehydrogenase hydrophobic membrane anchor protein
Clavibacter michiganensis strain PF008	28447.7	CP012573	fig|28447.7.peg.889	AES38_04395		PATRIC.28447.7.CP012573.CDS.909933.910367.rev	PATRIC	CDS	909933	910367	435	-	FIG00000800	PLF_1573_00001825	PGF_00054461		144		Succinate dehydrogenase cytochrome b-556 subunit
Clavibacter michiganensis strain PF008	28447.7	CP012573	fig|28447.7.peg.890	AES38_04400		PATRIC.28447.7.CP012573.CDS.910508.911683.rev	PATRIC	CDS	910508	911683	1176	-		PLF_1573_00000160	PGF_00009831		391		Glycosyltransferase
Clavibacter michiganensis strain PF008	28447.7	CP012573	fig|28447.7.peg.891	AES38_04405		PATRIC.28447.7.CP012573.CDS.911801.912922.fwd	PATRIC	CDS	911801	912922	1122	+	FIG01956356	PLF_1573_00001287	PGF_00019279		373		Mannose-1-phosphate guanylyltransferase (EC 2.7.7.13)
Clavibacter michiganensis strain PF008	28447.7	CP012573	fig|28447.7.peg.892	AES38_04410		PATRIC.28447.7.CP012573.CDS.912997.914070.fwd	PATRIC	CDS	912997	914070	1074	+	FIG00954491	PLF_1573_00001339	PGF_00411983		357		Bmp family protein
Clavibacter michiganensis strain PF008	28447.7	CP012573	fig|28447.7.peg.893	AES38_04415		PATRIC.28447.7.CP012573.CDS.914221.915315.fwd	PATRIC	CDS	914221	915315	1095	+	FIG01347954	PLF_1573_00001341	PGF_00411986		364		Bmp family protein
Clavibacter michiganensis strain PF008	28447.7	CP012573	fig|28447.7.peg.894	AES38_04420		PATRIC.28447.7.CP012573.CDS.915397.916938.fwd	PATRIC	CDS	915397	916938	1542	+	FIG01124919	PLF_1573_00001387	PGF_00003367		513		ABC transporter, ATP-binding protein
Clavibacter michiganensis strain PF008	28447.7	CP012573	fig|28447.7.peg.895	AES38_04425		PATRIC.28447.7.CP012573.CDS.916935.918317.fwd	PATRIC	CDS	916935	918317	1383	+	FIG00012945	PLF_1573_00000206	PGF_00005127		460		ABC transporter, permease protein
Clavibacter michiganensis strain PF008	28447.7	CP012573	fig|28447.7.peg.896	AES38_04430		PATRIC.28447.7.CP012573.CDS.918314.919618.fwd	PATRIC	CDS	918314	919618	1305	+	FIG00012945	PLF_1573_00000380	PGF_00005020		434		ABC transporter, permease protein
Clavibacter michiganensis strain PF008	28447.7	CP012573	fig|28447.7.peg.897	AES38_04435		PATRIC.28447.7.CP012573.CDS.919615.920046.fwd	PATRIC	CDS	919615	920046	432	+	FIG00000720	PLF_1573_00000386	PGF_00420111		143		Cytidine deaminase (EC 3.5.4.5)
Clavibacter michiganensis strain PF008	28447.7	CP012573	fig|28447.7.peg.898	AES38_04440		PATRIC.28447.7.CP012573.CDS.920043.921341.fwd	PATRIC	CDS	920043	921341	1299	+	FIG00001131	PLF_1573_00000693	PGF_00045926		432		Pyrimidine-nucleoside phosphorylase (EC 2.4.2.2)
Clavibacter michiganensis strain PF008	28447.7	CP012573	fig|28447.7.peg.899	AES38_04445		PATRIC.28447.7.CP012573.CDS.921414.922349.rev	PATRIC	CDS	921414	922349	936	-	FIG00000527	PLF_1573_00001740	PGF_00045929		311	rihB	Pyrimidine-specific ribonucleoside hydrolase RihB (EC 3.2.2.8)
Clavibacter michiganensis strain PF008	28447.7	CP012573	fig|28447.7.peg.900	AES38_04450		PATRIC.28447.7.CP012573.CDS.922453.923571.fwd	PATRIC	CDS	922453	923571	1119	+	FIG00000687	PLF_1573_00001468	PGF_00035193		372		Adenosine deaminase (EC 3.5.4.4)
Clavibacter michiganensis strain PF008	28447.7	CP012573	fig|28447.7.peg.901	AES38_04455		PATRIC.28447.7.CP012573.CDS.923642.924091.fwd	PATRIC	CDS	923642	924091	450	+	FIG00001811	PLF_1573_00003553	PGF_01252035		149		PTS system, mannitol-specific IIA component
Clavibacter michiganensis strain PF008	28447.7	CP012573	fig|28447.7.peg.902	AES38_04465		PATRIC.28447.7.CP012573.CDS.924309.925316.rev	PATRIC	CDS	924309	925316	1008	-	FIG00512492	PLF_1573_00000023	PGF_00164528		335		FIG00512493: hypothetical protein
Clavibacter michiganensis strain PF008	28447.7	CP012573	fig|28447.7.peg.903	AES38_04470		PATRIC.28447.7.CP012573.CDS.925313.925939.rev	PATRIC	CDS	925313	925939	627	-	FIG00075739	PLF_1573_00000236	PGF_01251506		208		Heavy metal resistance transcriptional regulator HmrR
Clavibacter michiganensis strain PF008	28447.7	CP012573	fig|28447.7.peg.904	AES38_04475		PATRIC.28447.7.CP012573.CDS.926029.927732.rev	PATRIC	CDS	926029	927732	1704	-	FIG00001022	PLF_1573_00000615	PGF_00033812		567		Phosphomannomutase (EC 5.4.2.8)
Clavibacter michiganensis strain PF008	28447.7	CP012573	fig|28447.7.peg.905	AES38_04480		PATRIC.28447.7.CP012573.CDS.927729.928556.rev	PATRIC	CDS	927729	928556	828	-	FIG00000659	PLF_1573_00002473	PGF_00038986		275		Purine nucleoside phosphorylase (EC 2.4.2.1)
Clavibacter michiganensis strain PF008	28447.7	CP012573	fig|28447.7.peg.906	AES38_04485		PATRIC.28447.7.CP012573.CDS.928647.930086.fwd	PATRIC	CDS	928647	930086	1440	+	FIG00136193	PLF_1573_00000136	PGF_00423332		479		Dihydrolipoamide dehydrogenase (EC 1.8.1.4)
Clavibacter michiganensis strain PF008	28447.7	CP012573	fig|28447.7.peg.907	AES38_04490		PATRIC.28447.7.CP012573.CDS.930395.931072.rev	PATRIC	CDS	930395	931072	678	-					225		hypothetical protein
Clavibacter michiganensis strain PF008	28447.7	CP012573	fig|28447.7.peg.908	AES38_04495		PATRIC.28447.7.CP012573.CDS.931197.931922.fwd	PATRIC	CDS	931197	931922	726	+					241		hypothetical protein
Clavibacter michiganensis strain PF008	28447.7	CP012573	fig|28447.7.peg.909	AES38_04500		PATRIC.28447.7.CP012573.CDS.931946.933715.rev	PATRIC	CDS	931946	933715	1770	-	FIG00002877	PLF_1573_00001338	PGF_00404271		589		Biotin carboxylase of acetyl-CoA carboxylase (EC 6.3.4.14) / Biotin carboxyl carrier protein of acetyl-CoA carboxylase
Clavibacter michiganensis strain PF008	28447.7	CP012573	fig|28447.7.peg.910	AES38_04505		PATRIC.28447.7.CP012573.CDS.933838.934365.fwd	PATRIC	CDS	933838	934365	528	+	FIG00511527	PLF_1573_00000979	PGF_01253415		175		FIG00511528: hypothetical protein
Clavibacter michiganensis strain PF008	28447.7	CP012573	fig|28447.7.peg.911	AES38_04510		PATRIC.28447.7.CP012573.CDS.934378.935049.rev	PATRIC	CDS	934378	935049	672	-	FIG00021845	PLF_1573_00000043	PGF_00018554		223		Maf/YceF/YhdE family protein
Clavibacter michiganensis strain PF008	28447.7	CP012573	fig|28447.7.peg.912	AES38_04515		PATRIC.28447.7.CP012573.CDS.935134.936381.fwd	PATRIC	CDS	935134	936381	1248	+	FIG01651823	PLF_1573_00002836	PGF_00415506		415		23S rRNA (uracil(1939)-C(5))-methyltransferase (EC 2.1.1.190)
Clavibacter michiganensis strain PF008	28447.7	CP012573	fig|28447.7.peg.913	AES38_04520		PATRIC.28447.7.CP012573.CDS.936523.937227.fwd	PATRIC	CDS	936523	937227	705	+	FIG01402845	PLF_1573_00002539	PGF_00063018		234		Two-component system, regulatory protein
Clavibacter michiganensis strain PF008	28447.7	CP012573	fig|28447.7.peg.914	AES38_04525		PATRIC.28447.7.CP012573.CDS.937261.938559.fwd	PATRIC	CDS	937261	938559	1299	+	FIG01757518	PLF_1573_00002537	PGF_00063001		432		Two-component system sensor protein
Clavibacter michiganensis strain PF008	28447.7	CP012573	fig|28447.7.peg.915	AES38_04530		PATRIC.28447.7.CP012573.CDS.938556.939578.fwd	PATRIC	CDS	938556	939578	1023	+	FIG00511708	PLF_1573_00000890	PGF_00312619		340		FIG00511709: hypothetical protein
Clavibacter michiganensis strain PF008	28447.7	CP012573	fig|28447.7.peg.916	AES38_04535		PATRIC.28447.7.CP012573.CDS.939844.940068.rev	PATRIC	CDS	939844	940068	225	-	FIG00512003	PLF_1573_00000891	PGF_01253359		74		FIG00512004: hypothetical protein
Clavibacter michiganensis strain PF008	28447.7	CP012573	fig|28447.7.peg.917	AES38_04540		PATRIC.28447.7.CP012573.CDS.940065.941702.rev	PATRIC	CDS	940065	941702	1638	-	FIG00002099	PLF_1573_00001503	PGF_00026327		545		Acetyl-coenzyme A carboxyl transferase alpha chain (EC 6.4.1.2) / Acetyl-coenzyme A carboxyl transferase beta chain (EC 6.4.1.2); Propionyl-CoA carboxylase beta chain (EC 6.4.1.3)
Clavibacter michiganensis strain PF008	28447.7	CP012573	fig|28447.7.peg.918	AES38_04545		PATRIC.28447.7.CP012573.CDS.941786.942568.fwd	PATRIC	CDS	941786	942568	783	+	FIG00000972	PLF_1573_00000345	PGF_00404584		260		Biotin--protein ligase (EC 6.3.4.9)(EC 6.3.4.10)(EC 6.3.4.11)(EC 6.3.4.15)
Clavibacter michiganensis strain PF008	28447.7	CP012573	fig|28447.7.peg.919	AES38_04550		PATRIC.28447.7.CP012573.CDS.942572.943354.fwd	PATRIC	CDS	942572	943354	783	+	FIG00512369	PLF_1573_00000892	PGF_00221576		260		FIG00512370: hypothetical protein
Clavibacter michiganensis strain PF008	28447.7	CP012573	fig|28447.7.peg.920	AES38_04555		PATRIC.28447.7.CP012573.CDS.943410.943916.rev	PATRIC	CDS	943410	943916	507	-	FIG00761799	PLF_1573_00001028	PGF_00407439		168		putative integral membrane protein
Clavibacter michiganensis strain PF008	28447.7	CP012573	fig|28447.7.peg.921			PATRIC.28447.7.CP012573.CDS.944750.945181.fwd	PATRIC	CDS	944750	945181	432	+	FIG00000375	PLF_1573_00002871	PGF_00024274		143		N5-carboxyaminoimidazole ribonucleotide synthase (EC 6.3.4.18)
Clavibacter michiganensis strain PF008	28447.7	CP012573	fig|28447.7.peg.922	AES38_04565		PATRIC.28447.7.CP012573.CDS.945241.945765.fwd	PATRIC	CDS	945241	945765	525	+	FIG00000227	PLF_1573_00001577	PGF_00024273		174		N5-carboxyaminoimidazole ribonucleotide mutase (EC 5.4.99.18)
Clavibacter michiganensis strain PF008	28447.7	CP012573	fig|28447.7.peg.923	AES38_04570		PATRIC.28447.7.CP012573.CDS.945762.947111.fwd	PATRIC	CDS	945762	947111	1350	+	FIG00818626	PLF_1573_00001366	PGF_00417158		449		Cell envelope-related transcriptional attenuator
Clavibacter michiganensis strain PF008	28447.7	CP012573	fig|28447.7.peg.924	AES38_04575		PATRIC.28447.7.CP012573.CDS.947127.948311.rev	PATRIC	CDS	947127	948311	1185	-	FIG00018328	PLF_1573_00001211	PGF_01251286		394		Glycosyltransferase
Clavibacter michiganensis strain PF008	28447.7	CP012573	fig|28447.7.peg.925	AES38_04580		PATRIC.28447.7.CP012573.CDS.948358.949104.rev	PATRIC	CDS	948358	949104	747	-	FIG01343192	PLF_1573_00001673	PGF_00034786		248		Polysaccharide ABC transporter, ATP-binding protein
Clavibacter michiganensis strain PF008	28447.7	CP012573	fig|28447.7.peg.926	AES38_04585		PATRIC.28447.7.CP012573.CDS.949088.949948.rev	PATRIC	CDS	949088	949948	861	-	FIG00521220	PLF_1573_00001064	PGF_00411868		286		rhamnose-containing polysacharide translocation permease
Clavibacter michiganensis strain PF008	28447.7	CP012573	fig|28447.7.peg.927	AES38_04590		PATRIC.28447.7.CP012573.CDS.950052.950906.rev	PATRIC	CDS	950052	950906	855	-	FIG00000368	PLF_1573_00000844	PGF_00070471		284		dTDP-4-dehydrorhamnose reductase (EC 1.1.1.133)
Clavibacter michiganensis strain PF008	28447.7	CP012573	fig|28447.7.peg.928	AES38_04595		PATRIC.28447.7.CP012573.CDS.950903.951892.rev	PATRIC	CDS	950903	951892	990	-	FIG00030688	PLF_1573_00001976	PGF_00070498		329		dTDP-glucose 4,6-dehydratase (EC 4.2.1.46)
Clavibacter michiganensis strain PF008	28447.7	CP012573	fig|28447.7.peg.929	AES38_04600		PATRIC.28447.7.CP012573.CDS.952064.952516.fwd	PATRIC	CDS	952064	952516	453	+	FIG00638284	PLF_1573_00002028	PGF_01251375		150		hypothetical protein
Clavibacter michiganensis strain PF008	28447.7	CP012573	fig|28447.7.peg.930	AES38_04605		PATRIC.28447.7.CP012573.CDS.952542.953147.fwd	PATRIC	CDS	952542	953147	606	+	FIG00000408	PLF_1573_00001975	PGF_00070460		201		dTDP-4-dehydrorhamnose 3,5-epimerase (EC 5.1.3.13)
Clavibacter michiganensis strain PF008	28447.7	CP012573	fig|28447.7.peg.931	AES38_04610		PATRIC.28447.7.CP012573.CDS.953151.954014.fwd	PATRIC	CDS	953151	954014	864	+	FIG00000187	PLF_1573_00001324	PGF_00007979		287		Glucose-1-phosphate thymidylyltransferase (EC 2.7.7.24)
Clavibacter michiganensis strain PF008	28447.7	CP012573	fig|28447.7.peg.932	AES38_04615		PATRIC.28447.7.CP012573.CDS.954043.955020.rev	PATRIC	CDS	954043	955020	978	-	FIG00763453	PLF_1573_00002542	PGF_01251527		325		UDP-glucose 4-epimerase
Clavibacter michiganensis strain PF008	28447.7	CP012573	fig|28447.7.peg.933	AES38_04620		PATRIC.28447.7.CP012573.CDS.955017.956048.rev	PATRIC	CDS	955017	956048	1032	-	FIG00454917	PLF_1573_00002306	PGF_00009110		343		Glycosyl transferase, family 2
Clavibacter michiganensis strain PF008	28447.7	CP012573	fig|28447.7.peg.934	AES38_04625		PATRIC.28447.7.CP012573.CDS.956045.956899.rev	PATRIC	CDS	956045	956899	855	-	FIG00454917	PLF_1573_00000151	PGF_00009135		284		Glycosyl transferase, family 2
Clavibacter michiganensis strain PF008	28447.7	CP012573	fig|28447.7.peg.935	AES38_04630		PATRIC.28447.7.CP012573.CDS.957174.959372.fwd	PATRIC	CDS	957174	959372	2199	+	FIG00511324	PLF_1573_00002583	PGF_01251540		732		FIG00511325: hypothetical protein
Clavibacter michiganensis strain PF008	28447.7	CP012573	fig|28447.7.peg.936	AES38_04635		PATRIC.28447.7.CP012573.CDS.959369.960325.fwd	PATRIC	CDS	959369	960325	957	+	FIG00454917	PLF_1573_00000710	PGF_00048280		318		Rhamnosyl transferase
Clavibacter michiganensis strain PF008	28447.7	CP012573	fig|28447.7.peg.937	AES38_04640		PATRIC.28447.7.CP012573.CDS.960367.961392.rev	PATRIC	CDS	960367	961392	1026	-	FIG00007960	PLF_1573_00002808	PGF_00009680		341		Glycosyltransferase
Clavibacter michiganensis strain PF008	28447.7	CP012573	fig|28447.7.peg.938	AES38_04645		PATRIC.28447.7.CP012573.CDS.961460.963313.rev	PATRIC	CDS	961460	963313	1854	-	FIG00638284	PLF_1573_00003091	PGF_01251763		617		hypothetical protein
Clavibacter michiganensis strain PF008	28447.7	CP012573	fig|28447.7.peg.939	AES38_04650		PATRIC.28447.7.CP012573.CDS.963525.964373.fwd	PATRIC	CDS	963525	964373	849	+	FIG01731286	PLF_1573_00001704	PGF_00041181		282		Putative glycosyltransferase
Clavibacter michiganensis strain PF008	28447.7	CP012573	fig|28447.7.peg.940	AES38_04655		PATRIC.28447.7.CP012573.CDS.964441.965604.fwd	PATRIC	CDS	964441	965604	1164	+	FIG00003472	PLF_1573_00001942	PGF_00064046		387		UDP-galactopyranose mutase (EC 5.4.99.9)
Clavibacter michiganensis strain PF008	28447.7	CP012573	fig|28447.7.peg.941	AES38_04660		PATRIC.28447.7.CP012573.CDS.965604.967622.fwd	PATRIC	CDS	965604	967622	2019	+	FIG00511876	PLF_1573_00000484	PGF_00403170		672		Bifunctional beta-1,5/1,6-galactofuranosyltransferase GlfT2 in cell wall galactan polymerization (EC 2.4.1.288)
Clavibacter michiganensis strain PF008	28447.7	CP012573	fig|28447.7.peg.942	AES38_04665		PATRIC.28447.7.CP012573.CDS.967743.969596.fwd	PATRIC	CDS	967743	969596	1854	+	FIG00512420	PLF_1573_00001219	PGF_01251287		617		Hemagglutinin-related protein
Clavibacter michiganensis strain PF008	28447.7	CP012573	fig|28447.7.peg.943	AES38_04670		PATRIC.28447.7.CP012573.CDS.969725.970195.fwd	PATRIC	CDS	969725	970195	471	+	FIG00512436	PLF_1573_00000978	PGF_00361223		156		FIG00512437: hypothetical protein
Clavibacter michiganensis strain PF008	28447.7	CP012573	fig|28447.7.peg.944	AES38_04675		PATRIC.28447.7.CP012573.CDS.970226.971518.rev	PATRIC	CDS	970226	971518	1293	-	FIG01311868	PLF_1573_00000344	PGF_01251994		430		Exopolysaccharide production protein
Clavibacter michiganensis strain PF008	28447.7	CP012573	fig|28447.7.peg.945	AES38_04680		PATRIC.28447.7.CP012573.CDS.971567.973030.rev	PATRIC	CDS	971567	973030	1464	-	FIG00512370	PLF_1573_00000024	PGF_00251055		487		exopolysaccharide production protein
Clavibacter michiganensis strain PF008	28447.7	CP012573	fig|28447.7.peg.946	AES38_04685		PATRIC.28447.7.CP012573.CDS.973125.974303.rev	PATRIC	CDS	973125	974303	1179	-	FIG01332484	PLF_1573_00002828	PGF_00008393		392		Glutaryl-CoA dehydrogenase (EC 1.3.99.7)
Clavibacter michiganensis strain PF008	28447.7	CP012573	fig|28447.7.peg.947	AES38_04690		PATRIC.28447.7.CP012573.CDS.974468.975784.fwd	PATRIC	CDS	974468	975784	1317	+	FIG00598409	PLF_1573_00000300	PGF_00019309		438		Mannose-6-phosphate isomerase (EC 5.3.1.8)
Clavibacter michiganensis strain PF008	28447.7	CP012573	fig|28447.7.peg.948	AES38_04695		PATRIC.28447.7.CP012573.CDS.975819.976787.fwd	PATRIC	CDS	975819	976787	969	+	FIG00022300	PLF_1573_00000822	PGF_00064074		322		UDP-glucose 4-epimerase (EC 5.1.3.2)
Clavibacter michiganensis strain PF008	28447.7	CP012573	fig|28447.7.peg.949	AES38_04700		PATRIC.28447.7.CP012573.CDS.976938.977255.fwd	PATRIC	CDS	976938	977255	318	+	FIG00019146	PLF_1573_00001820	PGF_00053952		105		Sporulation regulatory protein WhiB
Clavibacter michiganensis strain PF008	28447.7	CP012573	fig|28447.7.peg.950	AES38_04705		PATRIC.28447.7.CP012573.CDS.977349.980405.fwd	PATRIC	CDS	977349	980405	3057	+	FIG00454917	PLF_1573_00001153	PGF_00009119		1018		Glycosyl transferase, family 2
Clavibacter michiganensis strain PF008	28447.7	CP012573	fig|28447.7.peg.951	AES38_04710		PATRIC.28447.7.CP012573.CDS.980392.981921.fwd	PATRIC	CDS	980392	981921	1530	+	FIG00659627	PLF_1573_00000366	PGF_01252092		509		FIG083739: Putative secreted protein
Clavibacter michiganensis strain PF008	28447.7	CP012573	fig|28447.7.peg.952	AES38_04715		PATRIC.28447.7.CP012573.CDS.981985.982428.rev	PATRIC	CDS	981985	982428	444	-	FIG00638284	PLF_1573_00000893	PGF_00174196		147		hypothetical protein
Clavibacter michiganensis strain PF008	28447.7	CP012573	fig|28447.7.peg.953	AES38_04720		PATRIC.28447.7.CP012573.CDS.982475.982696.fwd	PATRIC	CDS	982475	982696	222	+	FIG00511505	PLF_1573_00002184	PGF_00276000		73		FIG00511507: hypothetical protein
Clavibacter michiganensis strain PF008	28447.7	CP012573	fig|28447.7.peg.954	AES38_04725		PATRIC.28447.7.CP012573.CDS.982693.984120.fwd	PATRIC	CDS	982693	984120	1428	+	FIG00001022	PLF_1573_00001658	PGF_00033812		475	manB	Phosphomannomutase (EC 5.4.2.8)
Clavibacter michiganensis strain PF008	28447.7	CP012573	fig|28447.7.peg.955	AES38_04730		PATRIC.28447.7.CP012573.CDS.984270.984551.fwd	PATRIC	CDS	984270	984551	282	+	FIG00638284	PLF_1573_00001757	PGF_00047642		93		Repressor CsoR of the copZA operon
Clavibacter michiganensis strain PF008	28447.7	CP012573	fig|28447.7.peg.956	AES38_04735		PATRIC.28447.7.CP012573.CDS.984595.984810.fwd	PATRIC	CDS	984595	984810	216	+	FIG00005595	PLF_1573_00001206	PGF_00419587		71		Copper(I) chaperone CopZ
Clavibacter michiganensis strain PF008	28447.7	CP012573	fig|28447.7.peg.957	AES38_04740		PATRIC.28447.7.CP012573.CDS.984812.987229.fwd	PATRIC	CDS	984812	987229	2418	+	FIG00658111	PLF_1573_00000278	PGF_00016810		805		Lead, cadmium, zinc and mercury transporting ATPase (EC 3.6.3.3) (EC 3.6.3.5); Copper-translocating P-type ATPase (EC 3.6.3.4)
Clavibacter michiganensis strain PF008	28447.7	CP012573	fig|28447.7.peg.958	AES38_04745		PATRIC.28447.7.CP012573.CDS.987303.988787.fwd	PATRIC	CDS	987303	988787	1485	+	FIG00000858	PLF_1573_00002298	PGF_00035385		494		Adenosylhomocysteinase (EC 3.3.1.1)
Clavibacter michiganensis strain PF008	28447.7	CP012573	fig|28447.7.peg.959	AES38_04750		PATRIC.28447.7.CP012573.CDS.988873.989742.rev	PATRIC	CDS	988873	989742	870	-	FIG00485194	PLF_1573_00002217	PGF_00408744		289		putative membrane protein
Clavibacter michiganensis strain PF008	28447.7	CP012573	fig|28447.7.peg.960	AES38_04755		PATRIC.28447.7.CP012573.CDS.989759.990754.fwd	PATRIC	CDS	989759	990754	996	+	FIG01417063	PLF_1573_00001029	PGF_00407651		331		putative integral membrane protein
Clavibacter michiganensis strain PF008	28447.7	CP012573	fig|28447.7.peg.961	AES38_04760		PATRIC.28447.7.CP012573.CDS.990806.993280.rev	PATRIC	CDS	990806	993280	2475	-	FIG00001469	PLF_1573_00000842	PGF_00069013		824		beta-glucosidase (EC 3.2.1.21)
Clavibacter michiganensis strain PF008	28447.7	CP012573	fig|28447.7.peg.962	AES38_04765		PATRIC.28447.7.CP012573.CDS.993331.994608.rev	PATRIC	CDS	993331	994608	1278	-	FIG00512058	PLF_1573_00001016	PGF_00401143		425		membrane protein, probable
Clavibacter michiganensis strain PF008	28447.7	CP012573	fig|28447.7.peg.963	AES38_04770		PATRIC.28447.7.CP012573.CDS.994719.995363.fwd	PATRIC	CDS	994719	995363	645	+	FIG00554417	PLF_1573_00000777	PGF_00058904		214		Transcriptional regulator, AcrR family
Clavibacter michiganensis strain PF008	28447.7	CP012573	fig|28447.7.peg.964	AES38_04775		PATRIC.28447.7.CP012573.CDS.995400.996707.rev	PATRIC	CDS	995400	996707	1308	-	FIG00485194	PLF_1573_00001041	PGF_00409658		435		putative membrane protein
Clavibacter michiganensis strain PF008	28447.7	CP012573	fig|28447.7.peg.965	AES38_04780		PATRIC.28447.7.CP012573.CDS.996722.997675.rev	PATRIC	CDS	996722	997675	954	-	FIG00006676	PLF_1573_00000512	PGF_00002674		317		FIG022979: MoxR-like ATPases
Clavibacter michiganensis strain PF008	28447.7	CP012573	fig|28447.7.peg.966	AES38_04785		PATRIC.28447.7.CP012573.CDS.997672.998934.rev	PATRIC	CDS	997672	998934	1263	-	FIG00512629	PLF_1573_00001798	PGF_01251328		420		Secreted protein
Clavibacter michiganensis strain PF008	28447.7	CP012573	fig|28447.7.peg.967	AES38_04790		PATRIC.28447.7.CP012573.CDS.998931.999620.rev	PATRIC	CDS	998931	999620	690	-	FIG00638284	PLF_1573_00000429	PGF_00014673		229		Integral membrane protein
Clavibacter michiganensis strain PF008	28447.7	CP012573	fig|28447.7.peg.968	AES38_04795		PATRIC.28447.7.CP012573.CDS.999617.1000864.rev	PATRIC	CDS	999617	1000864	1248	-	FIG00761799	PLF_1573_00001030	PGF_00407580		415		putative integral membrane protein
Clavibacter michiganensis strain PF008	28447.7	CP012573	fig|28447.7.peg.969	AES38_04800		PATRIC.28447.7.CP012573.CDS.1000986.1001666.fwd	PATRIC	CDS	1000986	1001666	681	+	FIG01441931	PLF_1573_00001933	PGF_00063027		226		Two-component system, regulatory protein
Clavibacter michiganensis strain PF008	28447.7	CP012573	fig|28447.7.peg.970			PATRIC.28447.7.CP012573.CDS.1001671.1003041.fwd	PATRIC	CDS	1001671	1003041	1371	+	FIG00868343	PLF_1573_00001801	PGF_00050571		456		Sensor histidine kinase MtrB (EC 2.7.3.-)
Clavibacter michiganensis strain PF008	28447.7	CP012573	fig|28447.7.peg.971			PATRIC.28447.7.CP012573.CDS.1003038.1004228.fwd	PATRIC	CDS	1003038	1004228	1191	+	FIG00863150	PLF_1573_00001274	PGF_01251292		396		LpqB
Clavibacter michiganensis strain PF008	28447.7	CP012573	fig|28447.7.peg.972			PATRIC.28447.7.CP012573.CDS.1004258.1005010.fwd	PATRIC	CDS	1004258	1005010	753	+	FIG00863150	PLF_1573_00001274	PGF_01251292		250		LpqB
Clavibacter michiganensis strain PF008	28447.7	CP012573	fig|28447.7.peg.973			PATRIC.28447.7.CP012573.CDS.1005477.1005863.fwd	PATRIC	CDS	1005477	1005863	387	+	FIG00004440	PLF_1573_00001201	PGF_00418776		128		Competence protein F homolog, phosphoribosyltransferase domain; protein YhgH required for utilization of DNA as sole source of carbon and energy
Clavibacter michiganensis strain PF008	28447.7	CP012573	fig|28447.7.peg.974	AES38_04820		PATRIC.28447.7.CP012573.CDS.1006017.1006706.fwd	PATRIC	CDS	1006017	1006706	690	+	FIG00001306	PLF_1573_00001773	PGF_00048916		229		Ribosome hibernation protein YhbH
Clavibacter michiganensis strain PF008	28447.7	CP012573	fig|28447.7.peg.975	AES38_04825		PATRIC.28447.7.CP012573.CDS.1006909.1009734.fwd	PATRIC	CDS	1006909	1009734	2826	+	FIG00034293	PLF_1573_00002470	PGF_00038646		941		Protein translocase subunit SecA
Clavibacter michiganensis strain PF008	28447.7	CP012573	fig|28447.7.peg.976	AES38_04830		PATRIC.28447.7.CP012573.CDS.1009854.1010444.rev	PATRIC	CDS	1009854	1010444	591	-	FIG00638284	PLF_1573_00002179	PGF_00200023		196		hypothetical protein
Clavibacter michiganensis strain PF008	28447.7	CP012573	fig|28447.7.peg.977	AES38_04835		PATRIC.28447.7.CP012573.CDS.1010649.1011257.fwd	PATRIC	CDS	1010649	1011257	609	+	FIG00512307	PLF_1573_00000960	PGF_01253406		202		FIG00512308: hypothetical protein
Clavibacter michiganensis strain PF008	28447.7	CP012573	fig|28447.7.peg.978	AES38_04840		PATRIC.28447.7.CP012573.CDS.1011313.1011951.fwd	PATRIC	CDS	1011313	1011951	639	+	FIG00511910	PLF_1573_00001054	PGF_01251268		212		putative membrane/secreted protein
Clavibacter michiganensis strain PF008	28447.7	CP012573	fig|28447.7.peg.979	AES38_04845		PATRIC.28447.7.CP012573.CDS.1011954.1013540.fwd	PATRIC	CDS	1011954	1013540	1587	+	FIG01363442	PLF_1573_00000750	PGF_01253314		528		Sporulation initiation inhibitor SOJ-like protein
Clavibacter michiganensis strain PF008	28447.7	CP012573	fig|28447.7.peg.980	AES38_04850		PATRIC.28447.7.CP012573.CDS.1013550.1015052.fwd	PATRIC	CDS	1013550	1015052	1503	+	FIG00945692	PLF_1573_00000746	PGF_00052416		500		Signal transduction histidine kinase, subgroup 2
Clavibacter michiganensis strain PF008	28447.7	CP012573	fig|28447.7.peg.981	AES38_04855		PATRIC.28447.7.CP012573.CDS.1015162.1015410.rev	PATRIC	CDS	1015162	1015410	249	-	FIG00018409	PLF_1573_00001078	PGF_00066839		82		WhiB-like transcription regulator
Clavibacter michiganensis strain PF008	28447.7	CP012573	fig|28447.7.peg.982	AES38_04860		PATRIC.28447.7.CP012573.CDS.1015657.1016088.fwd	PATRIC	CDS	1015657	1016088	432	+	FIG00512075	PLF_1573_00000959	PGF_01253404		143		FIG00512076: hypothetical protein
Clavibacter michiganensis strain PF008	28447.7	CP012573	fig|28447.7.peg.983	AES38_04865		PATRIC.28447.7.CP012573.CDS.1016116.1016595.rev	PATRIC	CDS	1016116	1016595	480	-	FIG00132548	PLF_1573_00000764	PGF_00056629		159		Thiol peroxidase, Bcp-type (EC 1.11.1.15)
Clavibacter michiganensis strain PF008	28447.7	CP012573	fig|28447.7.peg.984			PATRIC.28447.7.CP012573.CDS.1016999.1020685.rev	PATRIC	CDS	1016999	1020685	3687	-	FIG00638284				1228		hypothetical protein
Clavibacter michiganensis strain PF008	28447.7	CP012573	fig|28447.7.peg.985			PATRIC.28447.7.CP012573.CDS.1021289.1022611.rev	PATRIC	CDS	1021289	1022611	1323	-	FIG00638284				440		hypothetical protein
Clavibacter michiganensis strain PF008	28447.7	CP012573	fig|28447.7.peg.986	AES38_04880		PATRIC.28447.7.CP012573.CDS.1022946.1023440.fwd	PATRIC	CDS	1022946	1023440	495	+	FIG00648631	PLF_1573_00001348	PGF_00416406		164		CarD-like transcriptional regulator
Clavibacter michiganensis strain PF008	28447.7	CP012573	fig|28447.7.peg.987	AES38_04885		PATRIC.28447.7.CP012573.CDS.1023589.1023819.fwd	PATRIC	CDS	1023589	1023819	231	+	FIG00512140	PLF_1573_00002105	PGF_01251418		76		FIG00512142: hypothetical protein
Clavibacter michiganensis strain PF008	28447.7	CP012573	fig|28447.7.peg.988	AES38_04890		PATRIC.28447.7.CP012573.CDS.1023966.1024769.fwd	PATRIC	CDS	1023966	1024769	804	+	FIG00905474	PLF_1573_00002241	PGF_00410613		267		putative secreted protein
Clavibacter michiganensis strain PF008	28447.7	CP012573	fig|28447.7.peg.989	AES38_04895		PATRIC.28447.7.CP012573.CDS.1024911.1025324.fwd	PATRIC	CDS	1024911	1025324	414	+	FIG00511516	PLF_1573_00000958	PGF_01253403		137		FIG00511517: hypothetical protein
Clavibacter michiganensis strain PF008	28447.7	CP012573	fig|28447.7.peg.990	AES38_04900		PATRIC.28447.7.CP012573.CDS.1025351.1026883.rev	PATRIC	CDS	1025351	1026883	1533	-	FIG00554902	PLF_1573_00001244	PGF_00016049		510		L-asparagine permease
Clavibacter michiganensis strain PF008	28447.7	CP012573	fig|28447.7.peg.991			PATRIC.28447.7.CP012573.CDS.1027065.1027532.fwd	PATRIC	CDS	1027065	1027532	468	+		PLF_1573_00000980	PGF_01253417		155		hypothetical protein
Clavibacter michiganensis strain PF008	28447.7	CP012573	fig|28447.7.peg.992	AES38_04910		PATRIC.28447.7.CP012573.CDS.1027537.1028865.rev	PATRIC	CDS	1027537	1028865	1329	-	FIG01225794	PLF_1573_00000691	PGF_00045217		442		Putative transporter
Clavibacter michiganensis strain PF008	28447.7	CP012573	fig|28447.7.peg.993	AES38_04915		PATRIC.28447.7.CP012573.CDS.1028862.1029284.rev	PATRIC	CDS	1028862	1029284	423	-	FIG01513201	PLF_1573_00001893	PGF_00059570		140		Transcriptional regulator, MarR family
Clavibacter michiganensis strain PF008	28447.7	CP012573	fig|28447.7.peg.994	AES38_04920		PATRIC.28447.7.CP012573.CDS.1029466.1029654.fwd	PATRIC	CDS	1029466	1029654	189	+		PLF_1573_00002104	PGF_01251417		62		hypothetical protein
Clavibacter michiganensis strain PF008	28447.7	CP012573	fig|28447.7.peg.995	AES38_04925		PATRIC.28447.7.CP012573.CDS.1029736.1030554.fwd	PATRIC	CDS	1029736	1030554	819	+	FIG00638284	PLF_1573_00002393	PGF_00012601		272		Hydrolase
Clavibacter michiganensis strain PF008	28447.7	CP012573	fig|28447.7.peg.996	AES38_04930		PATRIC.28447.7.CP012573.CDS.1030573.1032447.rev	PATRIC	CDS	1030573	1032447	1875	-	FIG00012589	PLF_1573_00001320	PGF_00007836		624		Glucoamylase (EC 3.2.1.3)
Clavibacter michiganensis strain PF008	28447.7	CP012573	fig|28447.7.peg.997	AES38_04935		PATRIC.28447.7.CP012573.CDS.1032505.1033887.fwd	PATRIC	CDS	1032505	1033887	1383	+	FIG00000332	PLF_1573_00002705	PGF_00407143		460		putative glucose-6-phosphate 1-dehydrogenase
Clavibacter michiganensis strain PF008	28447.7	CP012573	fig|28447.7.peg.998			PATRIC.28447.7.CP012573.CDS.1033912.1034556.rev	PATRIC	CDS	1033912	1034556	645	-	FIG00511357	PLF_1573_00000093	PGF_01253384		214		FIG00511358: hypothetical protein
Clavibacter michiganensis strain PF008	28447.7	CP012573	fig|28447.7.peg.999	AES38_04945		PATRIC.28447.7.CP012573.CDS.1034753.1035982.fwd	PATRIC	CDS	1034753	1035982	1230	+	FIG00021330	PLF_1573_00002352	PGF_00019937		409		Membrane protein
Clavibacter michiganensis strain PF008	28447.7	CP012573	fig|28447.7.peg.1000	AES38_04950		PATRIC.28447.7.CP012573.CDS.1036025.1036213.rev	PATRIC	CDS	1036025	1036213	189	-	FIG00512306	PLF_1573_00002103	PGF_01251416		62		FIG00512307: hypothetical protein
Clavibacter michiganensis strain PF008	28447.7	CP012573	fig|28447.7.peg.1001	AES38_04955		PATRIC.28447.7.CP012573.CDS.1036374.1037528.fwd	PATRIC	CDS	1036374	1037528	1155	+	FIG00081580	PLF_1573_00001169	PGF_00065155		384		Arsenic efflux pump protein
Clavibacter michiganensis strain PF008	28447.7	CP012573	fig|28447.7.peg.1002	AES38_04960		PATRIC.28447.7.CP012573.CDS.1037611.1038189.fwd	PATRIC	CDS	1037611	1038189	579	+	FIG00628138	PLF_1573_00000779	PGF_00058904		192		Transcriptional regulator, AcrR family
Clavibacter michiganensis strain PF008	28447.7	CP012573	fig|28447.7.peg.1003			PATRIC.28447.7.CP012573.CDS.1038239.1040707.fwd	PATRIC	CDS	1038239	1040707	2469	+	FIG00511269	PLF_1573_00000427	PGF_00014647		822		Integral membrane protein
Clavibacter michiganensis strain PF008	28447.7	CP012573	fig|28447.7.peg.1004			PATRIC.28447.7.CP012573.CDS.1040704.1041177.fwd	PATRIC	CDS	1040704	1041177	474	+	FIG00511269	PLF_1573_00000427	PGF_00014647		157		Integral membrane protein
Clavibacter michiganensis strain PF008	28447.7	CP012573	fig|28447.7.peg.1005	AES38_04970		PATRIC.28447.7.CP012573.CDS.1041174.1043069.fwd	PATRIC	CDS	1041174	1043069	1896	+	FIG00511404	PLF_1573_00000308	PGF_00019643		631		Membrane protein
Clavibacter michiganensis strain PF008	28447.7	CP012573	fig|28447.7.peg.1006	AES38_04975		PATRIC.28447.7.CP012573.CDS.1043164.1044474.fwd	PATRIC	CDS	1043164	1044474	1311	+	FIG00511818	PLF_1573_00000957	PGF_00335852		436		FIG00511819: hypothetical protein
Clavibacter michiganensis strain PF008	28447.7	CP012573	fig|28447.7.peg.1007	AES38_04980		PATRIC.28447.7.CP012573.CDS.1044556.1044858.rev	PATRIC	CDS	1044556	1044858	303	-	FIG00027695	PLF_1573_00000981	PGF_00254508		100		Antibiotic biosynthesis monooxygenase
Clavibacter michiganensis strain PF008	28447.7	CP012573	fig|28447.7.peg.1008	AES38_04985		PATRIC.28447.7.CP012573.CDS.1045015.1045890.rev	PATRIC	CDS	1045015	1045890	876	-	FIG00511608	PLF_1573_00000277	PGF_00065324		291		Uncharacterized protein SCO3347
Clavibacter michiganensis strain PF008	28447.7	CP012573	fig|28447.7.peg.1009	AES38_04990		PATRIC.28447.7.CP012573.CDS.1046032.1046847.fwd	PATRIC	CDS	1046032	1046847	816	+	FIG00002860	PLF_1573_00001309	PGF_00006369		271		Fructosamine-3-kinase
Clavibacter michiganensis strain PF008	28447.7	CP012573	fig|28447.7.peg.1010	AES38_04995		PATRIC.28447.7.CP012573.CDS.1046948.1048543.fwd	PATRIC	CDS	1046948	1048543	1596	+	FIG00001100	PLF_1573_00000807	PGF_00061810		531		Trehalose-6-phosphate synthase (EC 2.4.1.15)
Clavibacter michiganensis strain PF008	28447.7	CP012573	fig|28447.7.peg.1011	AES38_05000		PATRIC.28447.7.CP012573.CDS.1048549.1049376.fwd	PATRIC	CDS	1048549	1049376	828	+	FIG00001349	PLF_1573_00000806	PGF_00061807		275		Trehalose-6-phosphate phosphatase (EC 3.1.3.12)
Clavibacter michiganensis strain PF008	28447.7	CP012573	fig|28447.7.peg.1012	AES38_05005		PATRIC.28447.7.CP012573.CDS.1049461.1052469.fwd	PATRIC	CDS	1049461	1052469	3009	+	FIG00001898	PLF_1573_00001589	PGF_00025139		1002		Na(+) H(+) antiporter subunit A / Na(+) H(+) antiporter subunit B
Clavibacter michiganensis strain PF008	28447.7	CP012573	fig|28447.7.peg.1013	AES38_05010		PATRIC.28447.7.CP012573.CDS.1052466.1053026.fwd	PATRIC	CDS	1052466	1053026	561	+	FIG00001398	PLF_1573_00000555	PGF_00025151		186		Na(+) H(+) antiporter subunit C
Clavibacter michiganensis strain PF008	28447.7	CP012573	fig|28447.7.peg.1014	AES38_05015		PATRIC.28447.7.CP012573.CDS.1053023.1054615.fwd	PATRIC	CDS	1053023	1054615	1593	+	FIG00001443	PLF_1573_00001590	PGF_00025155		530		Na(+) H(+) antiporter subunit D
Clavibacter michiganensis strain PF008	28447.7	CP012573	fig|28447.7.peg.1015	AES38_05020		PATRIC.28447.7.CP012573.CDS.1054612.1055286.fwd	PATRIC	CDS	1054612	1055286	675	+	FIG00001451	PLF_1573_00000556	PGF_00025158		224		Na(+) H(+) antiporter subunit E
Clavibacter michiganensis strain PF008	28447.7	CP012573	fig|28447.7.peg.1016	AES38_05025		PATRIC.28447.7.CP012573.CDS.1055283.1055558.fwd	PATRIC	CDS	1055283	1055558	276	+	FIG00001466	PLF_1573_00000557	PGF_00025166		91		Na(+) H(+) antiporter subunit F
Clavibacter michiganensis strain PF008	28447.7	CP012573	fig|28447.7.peg.1017	AES38_05030		PATRIC.28447.7.CP012573.CDS.1055555.1056124.fwd	PATRIC	CDS	1055555	1056124	570	+	FIG00007690	PLF_1573_00001591	PGF_00025170		189		Na(+) H(+) antiporter subunit G
Clavibacter michiganensis strain PF008	28447.7	CP012573	fig|28447.7.peg.1018	AES38_05035		PATRIC.28447.7.CP012573.CDS.1056193.1057887.fwd	PATRIC	CDS	1056193	1057887	1695	+	FIG00138258	PLF_1573_00000207	PGF_00423413		564		Dihydroxy-acid dehydratase (EC 4.2.1.9)
Clavibacter michiganensis strain PF008	28447.7	CP012573	fig|28447.7.peg.1019	AES38_05040		PATRIC.28447.7.CP012573.CDS.1057932.1059767.fwd	PATRIC	CDS	1057932	1059767	1836	+	FIG00136692	PLF_1573_00000187	PGF_00025090		611		Acetolactate synthase large subunit (EC 2.2.1.6)
Clavibacter michiganensis strain PF008	28447.7	CP012573	fig|28447.7.peg.1020	AES38_05045		PATRIC.28447.7.CP012573.CDS.1059764.1060273.fwd	PATRIC	CDS	1059764	1060273	510	+	FIG00000433	PLF_1573_00000438	PGF_00025215		169		Acetolactate synthase small subunit (EC 2.2.1.6)
Clavibacter michiganensis strain PF008	28447.7	CP012573	fig|28447.7.peg.1021	AES38_05050		PATRIC.28447.7.CP012573.CDS.1060443.1061468.fwd	PATRIC	CDS	1060443	1061468	1026	+	FIG00000244	PLF_1573_00001239	PGF_00015855		341		Ketol-acid reductoisomerase (EC 1.1.1.86)
Clavibacter michiganensis strain PF008	28447.7	CP012573	fig|28447.7.peg.1022	AES38_05055		PATRIC.28447.7.CP012573.CDS.1061582.1062121.fwd	PATRIC	CDS	1061582	1062121	540	+	FIG00511504	PLF_1573_00000956	PGF_01253402		179		FIG00511505: hypothetical protein
Clavibacter michiganensis strain PF008	28447.7	CP012573	fig|28447.7.peg.1023	AES38_05060		PATRIC.28447.7.CP012573.CDS.1062118.1062450.fwd	PATRIC	CDS	1062118	1062450	333	+	FIG00512262	PLF_1573_00000955	PGF_01253401		110		FIG00512263: hypothetical protein
Clavibacter michiganensis strain PF008	28447.7	CP012573	fig|28447.7.peg.1024	AES38_05065		PATRIC.28447.7.CP012573.CDS.1062469.1062870.rev	PATRIC	CDS	1062469	1062870	402	-	FIG00512539	PLF_1573_00000092	PGF_00200031		133		FIG00512540: hypothetical protein
Clavibacter michiganensis strain PF008	28447.7	CP012573	fig|28447.7.peg.1025	AES38_05070		PATRIC.28447.7.CP012573.CDS.1062934.1064523.fwd	PATRIC	CDS	1062934	1064523	1590	+	FIG00031250	PLF_1573_00001528	PGF_00420768		529		D-3-phosphoglycerate dehydrogenase (EC 1.1.1.95)
Clavibacter michiganensis strain PF008	28447.7	CP012573	fig|28447.7.peg.1026	AES38_05075		PATRIC.28447.7.CP012573.CDS.1064593.1065216.rev	PATRIC	CDS	1064593	1065216	624	-	FIG00554417	PLF_1573_00001867	PGF_00058904		207		Transcriptional regulator, AcrR family
Clavibacter michiganensis strain PF008	28447.7	CP012573	fig|28447.7.peg.1027	AES38_05080		PATRIC.28447.7.CP012573.CDS.1065340.1066878.fwd	PATRIC	CDS	1065340	1066878	1539	+	FIG00844614	PLF_1573_00000436	PGF_00014429		512		Integral membrane protein
Clavibacter michiganensis strain PF008	28447.7	CP012573	fig|28447.7.peg.1028	AES38_05085		PATRIC.28447.7.CP012573.CDS.1066953.1067207.rev	PATRIC	CDS	1066953	1067207	255	-	FIG00511972	PLF_1573_00000954	PGF_01253400		84		FIG00511973: hypothetical protein
Clavibacter michiganensis strain PF008	28447.7	CP012573	fig|28447.7.peg.1029	AES38_05090		PATRIC.28447.7.CP012573.CDS.1067322.1068389.fwd	PATRIC	CDS	1067322	1068389	1068	+	FIG00000341	PLF_1573_00001116	PGF_00419491		355		3-isopropylmalate dehydrogenase (EC 1.1.1.85)
Clavibacter michiganensis strain PF008	28447.7	CP012573	fig|28447.7.peg.1030	AES38_05095		PATRIC.28447.7.CP012573.CDS.1068398.1069510.fwd	PATRIC	CDS	1068398	1069510	1113	+	FIG00050603	PLF_1573_00001516	PGF_00412438		370		Branched-chain amino acid aminotransferase (EC 2.6.1.42)
Clavibacter michiganensis strain PF008	28447.7	CP012573	fig|28447.7.peg.1031	AES38_05100		PATRIC.28447.7.CP012573.CDS.1069577.1070455.rev	PATRIC	CDS	1069577	1070455	879	-	FIG00638284				292		UDP-glucose 4-epimerase (EC 5.1.3.2)
Clavibacter michiganensis strain PF008	28447.7	CP012573	fig|28447.7.peg.1032	AES38_05105		PATRIC.28447.7.CP012573.CDS.1070518.1070997.fwd	PATRIC	CDS	1070518	1070997	480	+	FIG00638284				159		hypothetical protein
Clavibacter michiganensis strain PF008	28447.7	CP012573	fig|28447.7.peg.1033	AES38_05110		PATRIC.28447.7.CP012573.CDS.1071009.1071782.fwd	PATRIC	CDS	1071009	1071782	774	+	FIG00007658	PLF_1573_00000321	PGF_00006517		257		Fumarylacetoacetate hydrolase family protein
Clavibacter michiganensis strain PF008	28447.7	CP012573	fig|28447.7.peg.1034	AES38_05115		PATRIC.28447.7.CP012573.CDS.1071785.1072552.fwd	PATRIC	CDS	1071785	1072552	768	+	FIG00512550	PLF_1573_00000953	PGF_01253399		255		FIG00512552: hypothetical protein
Clavibacter michiganensis strain PF008	28447.7	CP012573	fig|28447.7.peg.1035	AES38_05120		PATRIC.28447.7.CP012573.CDS.1072566.1074086.fwd	PATRIC	CDS	1072566	1074086	1521	+	FIG00000686	PLF_1573_00001333	PGF_00008337		506		Glutamyl-tRNA synthetase (EC 6.1.1.17) @ Glutamyl-tRNA(Gln) synthetase (EC 6.1.1.24)
Clavibacter michiganensis strain PF008	28447.7	CP012573	fig|28447.7.peg.1036	AES38_05125		PATRIC.28447.7.CP012573.CDS.1074079.1075029.fwd	PATRIC	CDS	1074079	1075029	951	+	FIG00018396	PLF_1573_00001849	PGF_00056792		316		Thioredoxin reductase (EC 1.8.1.9)
Clavibacter michiganensis strain PF008	28447.7	CP012573	fig|28447.7.peg.1037	AES38_05135		PATRIC.28447.7.CP012573.CDS.1075330.1076340.rev	PATRIC	CDS	1075330	1076340	1011	-	FIG00815091	PLF_1573_00000017	PGF_00035340		336		Potassium channel beta chain
Clavibacter michiganensis strain PF008	28447.7	CP012573	fig|28447.7.peg.1038	AES38_05140		PATRIC.28447.7.CP012573.CDS.1076474.1077484.rev	PATRIC	CDS	1076474	1077484	1011	-	FIG00815091	PLF_1573_00000017	PGF_00035340		336		Potassium channel beta chain
Clavibacter michiganensis strain PF008	28447.7	CP012573	fig|28447.7.peg.1039	AES38_05145		PATRIC.28447.7.CP012573.CDS.1077598.1078683.rev	PATRIC	CDS	1077598	1078683	1086	-	FIG00948083	PLF_1573_00001334	PGF_00014724		361		Integral membrane protein TerC
Clavibacter michiganensis strain PF008	28447.7	CP012573	fig|28447.7.peg.1040	AES38_05150		PATRIC.28447.7.CP012573.CDS.1078912.1079334.rev	PATRIC	CDS	1078912	1079334	423	-	FIG00511422	PLF_1573_00000952	PGF_01253398		140		FIG00511423: hypothetical protein
Clavibacter michiganensis strain PF008	28447.7	CP012573	fig|28447.7.peg.1041	AES38_05155		PATRIC.28447.7.CP012573.CDS.1079377.1080015.rev	PATRIC	CDS	1079377	1080015	639	-	FIG00511623	PLF_1573_00002602	PGF_00167483		212		FIG00511625: hypothetical protein
Clavibacter michiganensis strain PF008	28447.7	CP012573	fig|28447.7.peg.1042	AES38_05165		PATRIC.28447.7.CP012573.CDS.1080378.1081094.fwd	PATRIC	CDS	1080378	1081094	717	+	FIG00638284	PLF_1573_00002326	PGF_00419876		238		Cyanophycinase (EC 3.4.15.6)
Clavibacter michiganensis strain PF008	28447.7	CP012573	fig|28447.7.peg.1043	AES38_05170		PATRIC.28447.7.CP012573.CDS.1081105.1081791.fwd	PATRIC	CDS	1081105	1081791	687	+	FIG00000538	PLF_1573_00000833	PGF_00066139		228		Uracil-DNA glycosylase, family 1
Clavibacter michiganensis strain PF008	28447.7	CP012573	fig|28447.7.peg.1044			PATRIC.28447.7.CP012573.CDS.1082416.1083576.rev	PATRIC	CDS	1082416	1083576	1161	-	FIG00512575	PLF_1573_00000493	PGF_00419463		386		Conserved protein YyaK
Clavibacter michiganensis strain PF008	28447.7	CP012573	fig|28447.7.peg.1045	AES38_05185		PATRIC.28447.7.CP012573.CDS.1083709.1083930.fwd	PATRIC	CDS	1083709	1083930	222	+		PLF_1573_00002259	PGF_01251486		73		hypothetical protein
Clavibacter michiganensis strain PF008	28447.7	CP012573	fig|28447.7.peg.1046	AES38_05190		PATRIC.28447.7.CP012573.CDS.1083927.1084931.fwd	PATRIC	CDS	1083927	1084931	1005	+			PGF_00384251		334		NAD-dependent epimerase/dehydratase
Clavibacter michiganensis strain PF008	28447.7	CP012573	fig|28447.7.peg.1047	AES38_05195		PATRIC.28447.7.CP012573.CDS.1085005.1085628.rev	PATRIC	CDS	1085005	1085628	624	-	FIG00010868	PLF_1573_00000397	PGF_00420894		207		D-arabino-3-hexulose 6-phosphate formaldehyde-lyase (EC 4.1.2.43)
Clavibacter michiganensis strain PF008	28447.7	CP012573	fig|28447.7.peg.1048	AES38_05200		PATRIC.28447.7.CP012573.CDS.1085684.1086301.rev	PATRIC	CDS	1085684	1086301	618	-	FIG00002519	PLF_1573_00002303	PGF_00427142		205		6-phospho-3-hexuloisomerase (EC 5.3.1.27)
Clavibacter michiganensis strain PF008	28447.7	CP012573	fig|28447.7.peg.1049	AES38_05205		PATRIC.28447.7.CP012573.CDS.1086414.1087709.fwd	PATRIC	CDS	1086414	1087709	1296	+	FIG00511299	PLF_1573_00000011	PGF_00251055		431		FIG00511300: hypothetical protein
Clavibacter michiganensis strain PF008	28447.7	CP012573	fig|28447.7.peg.1050	AES38_05210		PATRIC.28447.7.CP012573.CDS.1087814.1089973.fwd	PATRIC	CDS	1087814	1089973	2160	+	FIG00003394	PLF_1573_00001137	PGF_00425931		719		5'-nucleotidase (EC 3.1.3.5)
Clavibacter michiganensis strain PF008	28447.7	CP012573	fig|28447.7.peg.1051	AES38_05215		PATRIC.28447.7.CP012573.CDS.1090060.1091487.fwd	PATRIC	CDS	1090060	1091487	1428	+	FIG00454158	PLF_1573_00001086	PGF_00049789		475		Amidase
Clavibacter michiganensis strain PF008	28447.7	CP012573	fig|28447.7.peg.1052	AES38_05220		PATRIC.28447.7.CP012573.CDS.1091518.1092255.rev	PATRIC	CDS	1091518	1092255	738	-	FIG00512171	PLF_1573_00000848	PGF_00072476		245		hypothetical membrane permease protein
Clavibacter michiganensis strain PF008	28447.7	CP012573	fig|28447.7.peg.1053	AES38_05225		PATRIC.28447.7.CP012573.CDS.1092336.1093346.fwd	PATRIC	CDS	1092336	1093346	1011	+	FIG00511500	PLF_1573_00000743	PGF_00052037		336		Siderophore-interacting protein
Clavibacter michiganensis strain PF008	28447.7	CP012573	fig|28447.7.peg.1054	AES38_05230		PATRIC.28447.7.CP012573.CDS.1093349.1093753.fwd	PATRIC	CDS	1093349	1093753	405	+	FIG00638284	PLF_1573_00002260	PGF_00293714		134		hypothetical protein
Clavibacter michiganensis strain PF008	28447.7	CP012573	fig|28447.7.peg.1055	AES38_05235		PATRIC.28447.7.CP012573.CDS.1093784.1094662.rev	PATRIC	CDS	1093784	1094662	879	-	FIG00546160	PLF_1573_00000585	PGF_00028567		292		Oxidoreductase
Clavibacter michiganensis strain PF008	28447.7	CP012573	fig|28447.7.peg.1056	AES38_05240		PATRIC.28447.7.CP012573.CDS.1094659.1095051.rev	PATRIC	CDS	1094659	1095051	393	-	FIG00512257	PLF_1573_00000951	PGF_00327647		130		FIG00512259: hypothetical protein
Clavibacter michiganensis strain PF008	28447.7	CP012573	fig|28447.7.peg.1057	AES38_05245		PATRIC.28447.7.CP012573.CDS.1095048.1096481.rev	PATRIC	CDS	1095048	1096481	1434	-	FIG00001597	PLF_1573_00001624	PGF_00029201		477		PF00070 family, FAD-dependent NAD(P)-disulphide oxidoreductase
Clavibacter michiganensis strain PF008	28447.7	CP012573	fig|28447.7.peg.1058	AES38_05250		PATRIC.28447.7.CP012573.CDS.1096577.1097422.rev	PATRIC	CDS	1096577	1097422	846	-	FIG00033206	PLF_1573_00001155	PGF_00424470		281		Enoyl-CoA hydratase (EC 4.2.1.17)
Clavibacter michiganensis strain PF008	28447.7	CP012573	fig|28447.7.peg.1059	AES38_05255		PATRIC.28447.7.CP012573.CDS.1097491.1098333.rev	PATRIC	CDS	1097491	1098333	843	-	FIG00003810	PLF_1573_00001197	PGF_00064165		280		Arginase/agmatinase/formimionoglutamate hydrolase, arginase family
Clavibacter michiganensis strain PF008	28447.7	CP012573	fig|28447.7.peg.1060	AES38_05260		PATRIC.28447.7.CP012573.CDS.1098436.1099083.rev	PATRIC	CDS	1098436	1099083	648	-	FIG00546293	PLF_1573_00001678	PGF_00035806		215		Predicted dinucleotide-binding enzymes
Clavibacter michiganensis strain PF008	28447.7	CP012573	fig|28447.7.peg.1061	AES38_05265		PATRIC.28447.7.CP012573.CDS.1099188.1099931.rev	PATRIC	CDS	1099188	1099931	744	-	FIG00006853	PLF_1573_00001837	PGF_00055295		247		Suppressor of sigma54-dependent transcription, PspA-like
Clavibacter michiganensis strain PF008	28447.7	CP012573	fig|28447.7.peg.1062	AES38_05270		PATRIC.28447.7.CP012573.CDS.1100061.1102106.rev	PATRIC	CDS	1100061	1102106	2046	-	FIG01417063	PLF_1573_00000224	PGF_00000398		681		FIG00810015: hypothetical protein
Clavibacter michiganensis strain PF008	28447.7	CP012573	fig|28447.7.peg.1063			PATRIC.28447.7.CP012573.CDS.1102124.1102675.rev	PATRIC	CDS	1102124	1102675	552	-	FIG00638284				183		hypothetical protein
Clavibacter michiganensis strain PF008	28447.7	CP012573	fig|28447.7.peg.1064	AES38_05280		PATRIC.28447.7.CP012573.CDS.1102734.1102976.rev	PATRIC	CDS	1102734	1102976	243	-		PLF_1573_00002178	PGF_01251461		80		hypothetical protein
Clavibacter michiganensis strain PF008	28447.7	CP012573	fig|28447.7.peg.1065	AES38_05290		PATRIC.28447.7.CP012573.CDS.1103629.1104321.fwd	PATRIC	CDS	1103629	1104321	693	+	FIG00133002	PLF_1573_00001739	PGF_00045834		230		Pyridoxamine 5'-phosphate oxidase (EC 1.4.3.5)
Clavibacter michiganensis strain PF008	28447.7	CP012573	fig|28447.7.peg.1066	AES38_05295		PATRIC.28447.7.CP012573.CDS.1104401.1105165.fwd	PATRIC	CDS	1104401	1105165	765	+	FIG00146363	PLF_1573_00004239	PGF_01252505		254		COG2071: predicted glutamine amidotransferases in hypothetical Actinobacterial gene cluster
Clavibacter michiganensis strain PF008	28447.7	CP012573	fig|28447.7.peg.1067	AES38_05300		PATRIC.28447.7.CP012573.CDS.1105196.1105951.rev	PATRIC	CDS	1105196	1105951	756	-	FIG00621114	PLF_1573_00000133	PGF_00420719		251		3-oxoacyl-[acyl-carrier protein] reductase (EC 1.1.1.100)
Clavibacter michiganensis strain PF008	28447.7	CP012573	fig|28447.7.peg.1068	AES38_05305		PATRIC.28447.7.CP012573.CDS.1105948.1106715.rev	PATRIC	CDS	1105948	1106715	768	-	FIG00621114	PLF_1573_00000134	PGF_00420719		255		3-oxoacyl-[acyl-carrier protein] reductase (EC 1.1.1.100)
Clavibacter michiganensis strain PF008	28447.7	CP012573	fig|28447.7.peg.1069	AES38_05310		PATRIC.28447.7.CP012573.CDS.1106712.1108085.rev	PATRIC	CDS	1106712	1108085	1374	-	FIG00016153	PLF_1573_00000685	PGF_00044263		457		Putative sugar transporter
Clavibacter michiganensis strain PF008	28447.7	CP012573	fig|28447.7.peg.1070	AES38_05315		PATRIC.28447.7.CP012573.CDS.1108120.1109010.rev	PATRIC	CDS	1108120	1109010	891	-	FIG00710272	PLF_1573_00001729	PGF_00043309		296		Putative polysaccharide deacetylase
Clavibacter michiganensis strain PF008	28447.7	CP012573	fig|28447.7.peg.1071	AES38_05320		PATRIC.28447.7.CP012573.CDS.1109036.1110061.rev	PATRIC	CDS	1109036	1110061	1026	-	FIG00000376	PLF_1573_00000256	PGF_00016046		341		L-asparaginase (EC 3.5.1.1)
Clavibacter michiganensis strain PF008	28447.7	CP012573	fig|28447.7.peg.1072	AES38_05325		PATRIC.28447.7.CP012573.CDS.1110232.1111260.fwd	PATRIC	CDS	1110232	1111260	1029	+	FIG00512468	PLF_1573_00001885	PGF_00059365		342		Transcriptional regulator, LacI family
Clavibacter michiganensis strain PF008	28447.7	CP012573	fig|28447.7.peg.1073	AES38_05330		PATRIC.28447.7.CP012573.CDS.1111317.1112111.fwd	PATRIC	CDS	1111317	1112111	795	+	FIG00512470	PLF_1573_00000795	PGF_01253321		264		Transglutaminase-like
Clavibacter michiganensis strain PF008	28447.7	CP012573	fig|28447.7.peg.1074	AES38_05335		PATRIC.28447.7.CP012573.CDS.1112166.1112810.rev	PATRIC	CDS	1112166	1112810	645	-	FIG00511456	PLF_1573_00002122	PGF_01251429		214		FIG00511458: hypothetical protein
Clavibacter michiganensis strain PF008	28447.7	CP012573	fig|28447.7.peg.1075	AES38_05340		PATRIC.28447.7.CP012573.CDS.1113027.1114691.fwd	PATRIC	CDS	1113027	1114691	1665	+	FIG00000088	PLF_1573_00000446	PGF_00064729		554		Arginyl-tRNA synthetase (EC 6.1.1.19)
Clavibacter michiganensis strain PF008	28447.7	CP012573	fig|28447.7.peg.1076	AES38_05345		PATRIC.28447.7.CP012573.CDS.1114703.1115533.fwd	PATRIC	CDS	1114703	1115533	831	+	FIG00511591	PLF_1573_00000950	PGF_00251055		276		FIG00511593: hypothetical protein
Clavibacter michiganensis strain PF008	28447.7	CP012573	fig|28447.7.peg.1077	AES38_05350		PATRIC.28447.7.CP012573.CDS.1115690.1117189.fwd	PATRIC	CDS	1115690	1117189	1500	+	FIG00138250	PLF_1573_00000116	PGF_00423094		499		Diaminopimelate decarboxylase (EC 4.1.1.20)
Clavibacter michiganensis strain PF008	28447.7	CP012573	fig|28447.7.peg.1078	AES38_05355		PATRIC.28447.7.CP012573.CDS.1117186.1118517.fwd	PATRIC	CDS	1117186	1118517	1332	+	FIG00000434	PLF_1573_00000417	PGF_00012339		443		Homoserine dehydrogenase (EC 1.1.1.3)
Clavibacter michiganensis strain PF008	28447.7	CP012573	fig|28447.7.peg.1079	AES38_05360		PATRIC.28447.7.CP012573.CDS.1118517.1119593.fwd	PATRIC	CDS	1118517	1119593	1077	+	FIG00000134	PLF_1573_00002919	PGF_00056860		358		Threonine synthase (EC 4.2.3.1)
Clavibacter michiganensis strain PF008	28447.7	CP012573	fig|28447.7.peg.1080	AES38_05365		PATRIC.28447.7.CP012573.CDS.1119605.1120555.fwd	PATRIC	CDS	1119605	1120555	951	+	FIG00000582	PLF_1573_00000418	PGF_00012356		316		Homoserine kinase (EC 2.7.1.39)
Clavibacter michiganensis strain PF008	28447.7	CP012573	fig|28447.7.peg.1081	AES38_05370		PATRIC.28447.7.CP012573.CDS.1120849.1123290.fwd	PATRIC	CDS	1120849	1123290	2442	+	FIG00000392	PLF_1573_00001856	PGF_00057483		813		Transcription termination factor Rho
Clavibacter michiganensis strain PF008	28447.7	CP012573	fig|28447.7.peg.1082	AES38_05375		PATRIC.28447.7.CP012573.CDS.1123294.1124373.fwd	PATRIC	CDS	1123294	1124373	1080	+	FIG00000188	PLF_1573_00001632	PGF_00030640		359		Peptide chain release factor 1
Clavibacter michiganensis strain PF008	28447.7	CP012573	fig|28447.7.peg.1083	AES38_05380		PATRIC.28447.7.CP012573.CDS.1124392.1125267.fwd	PATRIC	CDS	1124392	1125267	876	+	FIG00003217	PLF_1573_00000596	PGF_00030645		291		Peptide chain release factor N(5)-glutamine methyltransferase (EC 2.1.1.297)
Clavibacter michiganensis strain PF008	28447.7	CP012573	fig|28447.7.peg.1084	AES38_05385		PATRIC.28447.7.CP012573.CDS.1125307.1125960.rev	PATRIC	CDS	1125307	1125960	654	-	FIG00945972	PLF_1573_00001353	PGF_00010401		217		HAD superfamily hydrolase
Clavibacter michiganensis strain PF008	28447.7	CP012573	fig|28447.7.peg.1085			PATRIC.28447.7.CP012573.CDS.1125971.1126909.fwd	PATRIC	CDS	1125971	1126909	939	+	FIG00638284				312		hypothetical protein
Clavibacter michiganensis strain PF008	28447.7	CP012573	fig|28447.7.peg.1086	AES38_05395		PATRIC.28447.7.CP012573.CDS.1126906.1128225.fwd	PATRIC	CDS	1126906	1128225	1320	+	FIG01955782	PLF_1573_00000830	PGF_00065903		439		Undecaprenyl-phosphate alpha-N-acetylglucosaminyl 1-phosphate transferase (EC 2.7.8.33)
Clavibacter michiganensis strain PF008	28447.7	CP012573	fig|28447.7.peg.1087	AES38_05400		PATRIC.28447.7.CP012573.CDS.1128222.1128692.fwd	PATRIC	CDS	1128222	1128692	471	+	FIG00001431	PLF_1573_00000364	PGF_00003134		156		FIG048548: ATP synthase protein I2
Clavibacter michiganensis strain PF008	28447.7	CP012573	fig|28447.7.peg.1088	AES38_05405		PATRIC.28447.7.CP012573.CDS.1129014.1129694.fwd	PATRIC	CDS	1129014	1129694	681	+	FIG00000138	PLF_1573_00000173	PGF_00015039		226		ATP synthase F0 sector subunit a (EC 3.6.3.14)
Clavibacter michiganensis strain PF008	28447.7	CP012573	fig|28447.7.peg.1089	AES38_05410		PATRIC.28447.7.CP012573.CDS.1129741.1129974.fwd	PATRIC	CDS	1129741	1129974	234	+	FIG00017607	PLF_1573_00000469	PGF_00015142		77		ATP synthase F0 sector subunit c (EC 3.6.3.14)
Clavibacter michiganensis strain PF008	28447.7	CP012573	fig|28447.7.peg.1090	AES38_05415		PATRIC.28447.7.CP012573.CDS.1129986.1130552.fwd	PATRIC	CDS	1129986	1130552	567	+	FIG00000186	PLF_1573_00000383	PGF_00015075		188		ATP synthase F0 sector subunit b (EC 3.6.3.14)
Clavibacter michiganensis strain PF008	28447.7	CP012573	fig|28447.7.peg.1091	AES38_05420		PATRIC.28447.7.CP012573.CDS.1130552.1131343.fwd	PATRIC	CDS	1130552	1131343	792	+	FIG00000262	PLF_1573_00000177	PGF_00015218		263		ATP synthase delta chain (EC 3.6.3.14)
Clavibacter michiganensis strain PF008	28447.7	CP012573	fig|28447.7.peg.1092	AES38_05425		PATRIC.28447.7.CP012573.CDS.1131399.1133036.fwd	PATRIC	CDS	1131399	1133036	1638	+	FIG00000082	PLF_1573_00000175	PGF_00015154		545		ATP synthase alpha chain (EC 3.6.3.14)
Clavibacter michiganensis strain PF008	28447.7	CP012573	fig|28447.7.peg.1093	AES38_05430		PATRIC.28447.7.CP012573.CDS.1133086.1133985.fwd	PATRIC	CDS	1133086	1133985	900	+	FIG00023994	PLF_1573_00001498	PGF_00015259		299		ATP synthase gamma chain (EC 3.6.3.14)
Clavibacter michiganensis strain PF008	28447.7	CP012573	fig|28447.7.peg.1094	AES38_05435		PATRIC.28447.7.CP012573.CDS.1134021.1135481.fwd	PATRIC	CDS	1134021	1135481	1461	+	FIG00040241	PLF_1573_00001173	PGF_00015179		486		ATP synthase beta chain (EC 3.6.3.14)
Clavibacter michiganensis strain PF008	28447.7	CP012573	fig|28447.7.peg.1095	AES38_05440		PATRIC.28447.7.CP012573.CDS.1135483.1135752.fwd	PATRIC	CDS	1135483	1135752	270	+	FIG00000249	PLF_1573_00000384	PGF_00015235		89		ATP synthase epsilon chain (EC 3.6.3.14)
Clavibacter michiganensis strain PF008	28447.7	CP012573	fig|28447.7.peg.1096	AES38_05445		PATRIC.28447.7.CP012573.CDS.1135908.1136663.fwd	PATRIC	CDS	1135908	1136663	756	+	FIG00002158	PLF_1573_00000826	PGF_00064272		251		UPF0246 protein YaaA
Clavibacter michiganensis strain PF008	28447.7	CP012573	fig|28447.7.peg.1097	AES38_05450		PATRIC.28447.7.CP012573.CDS.1136737.1137330.rev	PATRIC	CDS	1136737	1137330	594	-	FIG00000673	PLF_1573_00000123	PGF_00421928		197		DNA-3-methyladenine glycosylase (EC 3.2.2.20)
Clavibacter michiganensis strain PF008	28447.7	CP012573	fig|28447.7.peg.1098	AES38_05455		PATRIC.28447.7.CP012573.CDS.1137327.1137923.rev	PATRIC	CDS	1137327	1137923	597	-	FIG00000328	PLF_1573_00000522	PGF_00020963		198		Methylated-DNA--protein-cysteine methyltransferase (EC 2.1.1.63)
Clavibacter michiganensis strain PF008	28447.7	CP012573	fig|28447.7.peg.1099	AES38_05460		PATRIC.28447.7.CP012573.CDS.1138030.1138509.rev	PATRIC	CDS	1138030	1138509	480	-	FIG01956023	PLF_1573_00001874	PGF_00059044		159		Transcriptional regulator, AsnC family
Clavibacter michiganensis strain PF008	28447.7	CP012573	fig|28447.7.peg.1100	AES38_05465		PATRIC.28447.7.CP012573.CDS.1138729.1139793.fwd	PATRIC	CDS	1138729	1139793	1065	+	FIG00512193	PLF_1573_00000949	PGF_00087832		354		FIG00512196: hypothetical protein
Clavibacter michiganensis strain PF008	28447.7	CP012573	fig|28447.7.peg.1101	AES38_05470		PATRIC.28447.7.CP012573.CDS.1139790.1140623.fwd	PATRIC	CDS	1139790	1140623	834	+	FIG00511846	PLF_1573_00001695	PGF_01251316		277		Protein phosphatase
Clavibacter michiganensis strain PF008	28447.7	CP012573	fig|28447.7.peg.1102	AES38_05475		PATRIC.28447.7.CP012573.CDS.1140642.1141628.rev	PATRIC	CDS	1140642	1141628	987	-	FIG00000908	PLF_1573_00001089	PGF_00020173		328		2,3,4,5-tetrahydropyridine-2,6-dicarboxylate N-succinyltransferase (EC 2.3.1.117)
Clavibacter michiganensis strain PF008	28447.7	CP012573	fig|28447.7.peg.1103	AES38_05480		PATRIC.28447.7.CP012573.CDS.1141709.1142806.fwd	PATRIC	CDS	1141709	1142806	1098	+	FIG00133108	PLF_1573_00001576	PGF_00024234		365		N-succinyl-L,L-diaminopimelate desuccinylase (EC 3.5.1.18)
Clavibacter michiganensis strain PF008	28447.7	CP012573	fig|28447.7.peg.1104	AES38_05485		PATRIC.28447.7.CP012573.CDS.1142788.1144020.fwd	PATRIC	CDS	1142788	1144020	1233	+	FIG01956050	PLF_1573_00000432	PGF_00014584		410		Integral membrane protein
Clavibacter michiganensis strain PF008	28447.7	CP012573	fig|28447.7.peg.1105			PATRIC.28447.7.CP012573.CDS.1144168.1144341.fwd	PATRIC	CDS	1144168	1144341	174	+	FIG00638284	PLF_1573_00001014	PGF_00251055		57		hypothetical protein
Clavibacter michiganensis strain PF008	28447.7	CP012573	fig|28447.7.peg.1106	AES38_05490		PATRIC.28447.7.CP012573.CDS.1144423.1145055.rev	PATRIC	CDS	1144423	1145055	633	-	FIG00821228	PLF_1573_00000562	PGF_00026743		210		O-methyltransferase
Clavibacter michiganensis strain PF008	28447.7	CP012573	fig|28447.7.peg.1107	AES38_05495		PATRIC.28447.7.CP012573.CDS.1145207.1145581.fwd	PATRIC	CDS	1145207	1145581	375	+	FIG00000670	PLF_1573_00001921	PGF_00062137		124		Twin-arginine translocation protein TatB
Clavibacter michiganensis strain PF008	28447.7	CP012573	fig|28447.7.peg.1108	AES38_05500		PATRIC.28447.7.CP012573.CDS.1145606.1146523.rev	PATRIC	CDS	1145606	1146523	918	-	FIG00511787	PLF_1573_00001888	PGF_00059484		305		Transcriptional regulator, LysR family
Clavibacter michiganensis strain PF008	28447.7	CP012573	fig|28447.7.peg.1109			PATRIC.28447.7.CP012573.CDS.1146639.1146761.fwd	PATRIC	CDS	1146639	1146761	123	+	FIG00638284	PLF_1573_00002177	PGF_01251460		40		hypothetical protein
Clavibacter michiganensis strain PF008	28447.7	CP012573	fig|28447.7.peg.1110	AES38_05505		PATRIC.28447.7.CP012573.CDS.1146853.1148007.rev	PATRIC	CDS	1146853	1148007	1155	-	FIG00448421	PLF_1573_00000534	PGF_00022722		384		Mrp protein homolog
Clavibacter michiganensis strain PF008	28447.7	CP012573	fig|28447.7.peg.1111	AES38_05510		PATRIC.28447.7.CP012573.CDS.1148018.1148566.rev	PATRIC	CDS	1148018	1148566	549	-		PLF_1573_00000511	PGF_00000494		182		FIG00816212: Putative membrane protein
Clavibacter michiganensis strain PF008	28447.7	CP012573	fig|28447.7.peg.1112	AES38_05515		PATRIC.28447.7.CP012573.CDS.1148550.1149851.rev	PATRIC	CDS	1148550	1149851	1302	-	FIG00437800	PLF_1573_00001555	PGF_00021406		433		Mg/Co/Ni transporter MgtE, CBS domain-containing
Clavibacter michiganensis strain PF008	28447.7	CP012573	fig|28447.7.peg.1113	AES38_05520		PATRIC.28447.7.CP012573.CDS.1149994.1150638.fwd	PATRIC	CDS	1149994	1150638	645	+	FIG00512401	PLF_1573_00000948	PGF_01253396		214		FIG00512403: hypothetical protein
Clavibacter michiganensis strain PF008	28447.7	CP012573	fig|28447.7.peg.1114	AES38_05525		PATRIC.28447.7.CP012573.CDS.1150669.1152291.rev	PATRIC	CDS	1150669	1152291	1623	-	FIG00010600	PLF_1573_00001961	PGF_00066867		540		Xaa-Pro aminopeptidase (EC 3.4.11.9)
Clavibacter michiganensis strain PF008	28447.7	CP012573	fig|28447.7.peg.1115	AES38_05530		PATRIC.28447.7.CP012573.CDS.1152347.1153372.rev	PATRIC	CDS	1152347	1153372	1026	-	FIG00010600	PLF_1573_00002548	PGF_00066867		341		Xaa-Pro aminopeptidase (EC 3.4.11.9)
Clavibacter michiganensis strain PF008	28447.7	CP012573	fig|28447.7.peg.1116	AES38_05535		PATRIC.28447.7.CP012573.CDS.1153465.1154340.fwd	PATRIC	CDS	1153465	1154340	876	+	FIG00031715	PLF_1573_00001345	PGF_00425670		291		FIG00031715: Predicted metal-dependent phosphoesterases (PHP family)
Clavibacter michiganensis strain PF008	28447.7	CP012573	fig|28447.7.peg.1117	AES38_05540		PATRIC.28447.7.CP012573.CDS.1154466.1155980.rev	PATRIC	CDS	1154466	1155980	1515	-	FIG01121467	PLF_1573_00002397	PGF_00017257		504		ATP-dependent RNA helicase
Clavibacter michiganensis strain PF008	28447.7	CP012573	fig|28447.7.peg.1118	AES38_05545		PATRIC.28447.7.CP012573.CDS.1156121.1156849.fwd	PATRIC	CDS	1156121	1156849	729	+	FIG00511276	PLF_1573_00002102	PGF_00251055		242		FIG00511277: hypothetical protein
Clavibacter michiganensis strain PF008	28447.7	CP012573	fig|28447.7.peg.1119	AES38_05550		PATRIC.28447.7.CP012573.CDS.1156925.1157212.rev	PATRIC	CDS	1156925	1157212	288	-	FIG00512552	PLF_1573_00000947	PGF_01253395		95		FIG00512553: hypothetical protein
Clavibacter michiganensis strain PF008	28447.7	CP012573	fig|28447.7.peg.1120	AES38_05555		PATRIC.28447.7.CP012573.CDS.1157223.1157447.rev	PATRIC	CDS	1157223	1157447	225	-	FIG00945249	PLF_1573_00001697	PGF_01251318		74		Putative ATP-binding protein
Clavibacter michiganensis strain PF008	28447.7	CP012573	fig|28447.7.peg.1121	AES38_05560		PATRIC.28447.7.CP012573.CDS.1157642.1160911.fwd	PATRIC	CDS	1157642	1160911	3270	+	FIG00030006	PLF_1573_00002315	PGF_00016735		1089		ATP-dependent DNA helicase SCO5183
Clavibacter michiganensis strain PF008	28447.7	CP012573	fig|28447.7.peg.1122	AES38_05565		PATRIC.28447.7.CP012573.CDS.1160908.1164204.fwd	PATRIC	CDS	1160908	1164204	3297	+	FIG00137374	PLF_1573_00001180	PGF_00016771		1098		ATP-dependent DNA helicase SCO5184
Clavibacter michiganensis strain PF008	28447.7	CP012573	fig|28447.7.peg.1123			PATRIC.28447.7.CP012573.CDS.1164363.1165172.fwd	PATRIC	CDS	1164363	1165172	810	+	FIG00638284	PLF_1573_00002682	PGF_00093359		269		hypothetical protein
Clavibacter michiganensis strain PF008	28447.7	CP012573	fig|28447.7.peg.1124	AES38_05575		PATRIC.28447.7.CP012573.CDS.1165332.1166285.fwd	PATRIC	CDS	1165332	1166285	954	+	FIG00000911	PLF_1573_00000551	PGF_00024615		317		NADH pyrophosphatase (EC 3.6.1.22)
Clavibacter michiganensis strain PF008	28447.7	CP012573	fig|28447.7.peg.1125	AES38_05580		PATRIC.28447.7.CP012573.CDS.1166502.1168214.fwd	PATRIC	CDS	1166502	1168214	1713	+	FIG00004012	PLF_1573_00000437	PGF_00016824		570		ATP-dependent DNA helicase UvrD/PcrA, actinomycete paralog
Clavibacter michiganensis strain PF008	28447.7	CP012573	fig|28447.7.peg.1126	AES38_05585		PATRIC.28447.7.CP012573.CDS.1169051.1170463.rev	PATRIC	CDS	1169051	1170463	1413	-	FIG00672327	PLF_1573_00002544	PGF_00065329		470		Uncharacterized protein SCO5199
Clavibacter michiganensis strain PF008	28447.7	CP012573	fig|28447.7.peg.1127	AES38_05590		PATRIC.28447.7.CP012573.CDS.1170677.1171768.fwd	PATRIC	CDS	1170677	1171768	1092	+	FIG00051666	PLF_1573_00001271	PGF_00017520		363		Lon-like protease with PDZ domain
Clavibacter michiganensis strain PF008	28447.7	CP012573	fig|28447.7.peg.1128	AES38_05595		PATRIC.28447.7.CP012573.CDS.1171896.1174850.fwd	PATRIC	CDS	1171896	1174850	2955	+	FIG00525068	PLF_1573_00001947	PGF_00064232		984		UPF0182 protein AF1421
Clavibacter michiganensis strain PF008	28447.7	CP012573	fig|28447.7.peg.1129	AES38_05605		PATRIC.28447.7.CP012573.CDS.1175130.1175795.rev	PATRIC	CDS	1175130	1175795	666	-	FIG01922188	PLF_1573_00001136	PGF_00037123		221		AhpC/Tsa family protein
Clavibacter michiganensis strain PF008	28447.7	CP012573	fig|28447.7.peg.1130	AES38_05610		PATRIC.28447.7.CP012573.CDS.1175924.1177645.rev	PATRIC	CDS	1175924	1177645	1722	-		PLF_1573_00000828	PGF_00064523		573		Uncharacterized ABC1 family protein Caur_1826
Clavibacter michiganensis strain PF008	28447.7	CP012573	fig|28447.7.peg.1131	AES38_05615		PATRIC.28447.7.CP012573.CDS.1177642.1178235.rev	PATRIC	CDS	1177642	1178235	594	-	FIG00002474	PLF_1573_00000792	PGF_00059746		197		Transcriptional regulator, PadR family
Clavibacter michiganensis strain PF008	28447.7	CP012573	fig|28447.7.peg.1132	AES38_05620		PATRIC.28447.7.CP012573.CDS.1178364.1179356.rev	PATRIC	CDS	1178364	1179356	993	-	FIG00000362	PLF_1573_00000283	PGF_00017479		330		Lipoyl synthase (EC 2.8.1.8)
Clavibacter michiganensis strain PF008	28447.7	CP012573	fig|28447.7.peg.1133	AES38_05625		PATRIC.28447.7.CP012573.CDS.1179353.1180054.rev	PATRIC	CDS	1179353	1180054	702	-	FIG00000528	PLF_1573_00001606	PGF_00026861		233		Octanoate-[acyl-carrier-protein]-protein-N-octanoyltransferase (EC 2.3.1.181)
Clavibacter michiganensis strain PF008	28447.7	CP012573	fig|28447.7.peg.1134	AES38_05630		PATRIC.28447.7.CP012573.CDS.1180149.1181030.fwd	PATRIC	CDS	1180149	1181030	882	+	FIG00997350	PLF_1573_00001543	PGF_00015355		293		Iron utilization protein
Clavibacter michiganensis strain PF008	28447.7	CP012573	fig|28447.7.peg.1135	AES38_05635		PATRIC.28447.7.CP012573.CDS.1181141.1181803.fwd	PATRIC	CDS	1181141	1181803	663	+	FIG00773824	PLF_1573_00001295	PGF_00019870		220		Membrane protein
Clavibacter michiganensis strain PF008	28447.7	CP012573	fig|28447.7.peg.1136	AES38_05640		PATRIC.28447.7.CP012573.CDS.1181814.1182320.rev	PATRIC	CDS	1181814	1182320	507	-	FIG00554427	PLF_1573_00000672	PGF_01253303		168		Putative inner membrane protein
Clavibacter michiganensis strain PF008	28447.7	CP012573	fig|28447.7.peg.1137	AES38_05645		PATRIC.28447.7.CP012573.CDS.1182603.1183208.rev	PATRIC	CDS	1182603	1183208	606	-					201		hypothetical protein
Clavibacter michiganensis strain PF008	28447.7	CP012573	fig|28447.7.peg.1138			PATRIC.28447.7.CP012573.CDS.1183332.1183496.rev	PATRIC	CDS	1183332	1183496	165	-					54		hypothetical protein
Clavibacter michiganensis strain PF008	28447.7	CP012573	fig|28447.7.peg.1139	AES38_05655		PATRIC.28447.7.CP012573.CDS.1183635.1185992.fwd	PATRIC	CDS	1183635	1185992	2358	+	FIG00008307	PLF_1573_00000835	PGF_01253325		785		VgrG protein
Clavibacter michiganensis strain PF008	28447.7	CP012573	fig|28447.7.peg.1140	AES38_05660		PATRIC.28447.7.CP012573.CDS.1186091.1186528.fwd	PATRIC	CDS	1186091	1186528	438	+	FIG00000770	PLF_1573_00001165	PGF_00065143		145		Arsenate-mycothiol transferase (EC 2.8.4.2)
Clavibacter michiganensis strain PF008	28447.7	CP012573	fig|28447.7.peg.1141	AES38_05665		PATRIC.28447.7.CP012573.CDS.1186525.1187151.rev	PATRIC	CDS	1186525	1187151	627	-	FIG00628138	PLF_1573_00001063	PGF_00411503		208		regulation of the polyketide synthase operon (pks)
Clavibacter michiganensis strain PF008	28447.7	CP012573	fig|28447.7.peg.1142	AES38_05670		PATRIC.28447.7.CP012573.CDS.1187229.1188545.fwd	PATRIC	CDS	1187229	1188545	1317	+	FIG00511843	PLF_1573_00002203	PGF_00406501		438		putative carboxylesterase
Clavibacter michiganensis strain PF008	28447.7	CP012573	fig|28447.7.peg.1143	AES38_05675		PATRIC.28447.7.CP012573.CDS.1188722.1189453.fwd	PATRIC	CDS	1188722	1189453	732	+		PLF_1573_00000036	PGF_00137447		243		hypothetical protein
Clavibacter michiganensis strain PF008	28447.7	CP012573	fig|28447.7.peg.1144			PATRIC.28447.7.CP012573.CDS.1189510.1190247.rev	PATRIC	CDS	1189510	1190247	738	-	FIG00512637	PLF_1573_00001088	PGF_00027306		245		Acetyltransferase
Clavibacter michiganensis strain PF008	28447.7	CP012573	fig|28447.7.peg.1145	AES38_05685		PATRIC.28447.7.CP012573.CDS.1190333.1191094.fwd	PATRIC	CDS	1190333	1191094	762	+					253		hypothetical protein
Clavibacter michiganensis strain PF008	28447.7	CP012573	fig|28447.7.peg.1146	AES38_05690		PATRIC.28447.7.CP012573.CDS.1191166.1191360.fwd	PATRIC	CDS	1191166	1191360	195	+					64		hypothetical protein
Clavibacter michiganensis strain PF008	28447.7	CP012573	fig|28447.7.peg.1147	AES38_05695		PATRIC.28447.7.CP012573.CDS.1191453.1193213.rev	PATRIC	CDS	1191453	1193213	1761	-	FIG00001381	PLF_1573_00001411	PGF_00421097		586		DEAD-box ATP-dependent RNA helicase CshA (EC 3.6.4.13)
Clavibacter michiganensis strain PF008	28447.7	CP012573	fig|28447.7.peg.1148	AES38_05700		PATRIC.28447.7.CP012573.CDS.1193300.1194109.rev	PATRIC	CDS	1193300	1194109	810	-	FIG00121578	PLF_1573_00001208	PGF_01251285		269		CrtT-methyltransferase-like protein
Clavibacter michiganensis strain PF008	28447.7	CP012573	fig|28447.7.peg.1149			PATRIC.28447.7.CP012573.CDS.1194106.1194768.rev	PATRIC	CDS	1194106	1194768	663	-					220		hypothetical protein
Clavibacter michiganensis strain PF008	28447.7	CP012573	fig|28447.7.peg.1150			PATRIC.28447.7.CP012573.CDS.1194966.1196489.fwd	PATRIC	CDS	1194966	1196489	1524	+					507		hypothetical protein
Clavibacter michiganensis strain PF008	28447.7	CP012573	fig|28447.7.peg.1151			PATRIC.28447.7.CP012573.CDS.1196551.1196721.rev	PATRIC	CDS	1196551	1196721	171	-					56		hypothetical protein
Clavibacter michiganensis strain PF008	28447.7	CP012573	fig|28447.7.peg.1152	AES38_05710		PATRIC.28447.7.CP012573.CDS.1196860.1198047.rev	PATRIC	CDS	1196860	1198047	1188	-		PLF_1573_00003643	PGF_00045694		395		Putative uroporphyrinogen-III synthase (EC 4.2.1.75), related to YjjA (in BS) / Response regulator
Clavibacter michiganensis strain PF008	28447.7	CP012573	fig|28447.7.peg.1153	AES38_05715		PATRIC.28447.7.CP012573.CDS.1198068.1199132.rev	PATRIC	CDS	1198068	1199132	1065	-	FIG00090522	PLF_1573_00004672	PGF_01252884		354		Siroheme synthase / Precorrin-2 oxidase (EC 1.3.1.76) / Sirohydrochlorin ferrochelatase (EC 4.99.1.4) / Uroporphyrinogen-III methyltransferase (EC 2.1.1.107)
Clavibacter michiganensis strain PF008	28447.7	CP012573	fig|28447.7.peg.1154	AES38_05720		PATRIC.28447.7.CP012573.CDS.1199136.1201790.rev	PATRIC	CDS	1199136	1201790	2655	-	FIG00000873	PLF_1573_00003644	PGF_00025836		884		Nitrite reductase [NAD(P)H] large subunit (EC 1.7.1.4)
Clavibacter michiganensis strain PF008	28447.7	CP012573	fig|28447.7.peg.1155	AES38_05725		PATRIC.28447.7.CP012573.CDS.1202040.1203116.fwd	PATRIC	CDS	1202040	1203116	1077	+	FIG00132864	PLF_1573_00003645	PGF_00052852		358		Sirohydrochlorin ferrochelatase SirB (EC 4.99.1.4)
Clavibacter michiganensis strain PF008	28447.7	CP012573	fig|28447.7.peg.1156			PATRIC.28447.7.CP012573.CDS.1203239.1204723.fwd	PATRIC	CDS	1203239	1204723	1485	+	FIG00005529	PLF_1573_00003646	PGF_00025728		494		Nitrate/nitrite transporter
Clavibacter michiganensis strain PF008	28447.7	CP012573	fig|28447.7.peg.1157	AES38_05735		PATRIC.28447.7.CP012573.CDS.1204723.1206915.fwd	PATRIC	CDS	1204723	1206915	2193	+	FIG00059898	PLF_1573_00003647	PGF_00067840		730		Assimilatory nitrate reductase large subunit (EC 1.7.99.4)
Clavibacter michiganensis strain PF008	28447.7	CP012573	fig|28447.7.peg.1158	AES38_05740		PATRIC.28447.7.CP012573.CDS.1206908.1208653.fwd	PATRIC	CDS	1206908	1208653	1746	+	FIG00000873	PLF_1573_00003648	PGF_00025836		581		Nitrite reductase [NAD(P)H] large subunit (EC 1.7.1.4)
Clavibacter michiganensis strain PF008	28447.7	CP012573	fig|28447.7.peg.1159	AES38_05745		PATRIC.28447.7.CP012573.CDS.1208696.1209958.rev	PATRIC	CDS	1208696	1209958	1263	-	FIG00638284				420		Molybdopterin molybdenumtransferase (EC 2.10.1.1)
Clavibacter michiganensis strain PF008	28447.7	CP012573	fig|28447.7.peg.1160			PATRIC.28447.7.CP012573.CDS.1209955.1210377.rev	PATRIC	CDS	1209955	1210377	423	-		PLF_1573_00004436	PGF_01252665		140		hypothetical protein
Clavibacter michiganensis strain PF008	28447.7	CP012573	fig|28447.7.peg.1161	AES38_05755		PATRIC.28447.7.CP012573.CDS.1210367.1211134.rev	PATRIC	CDS	1210367	1211134	768	-	FIG00638284				255		hypothetical protein
Clavibacter michiganensis strain PF008	28447.7	CP012573	fig|28447.7.peg.1162	AES38_05760		PATRIC.28447.7.CP012573.CDS.1211291.1212814.rev	PATRIC	CDS	1211291	1212814	1524	-	FIG00008246	PLF_1573_00002872	PGF_00025269		507		Na+/H+ antiporter
Clavibacter michiganensis strain PF008	28447.7	CP012573	fig|28447.7.peg.1163	AES38_05765		PATRIC.28447.7.CP012573.CDS.1212863.1213486.rev	PATRIC	CDS	1212863	1213486	624	-		PLF_1573_00002453	PGF_00033723		207		Phospholipase/carboxylesterase family protein
Clavibacter michiganensis strain PF008	28447.7	CP012573	fig|28447.7.peg.1164	AES38_05770		PATRIC.28447.7.CP012573.CDS.1213483.1214460.rev	PATRIC	CDS	1213483	1214460	978	-	FIG00007915	PLF_1573_00002364	PGF_00010007		325		Glyoxalase family protein
Clavibacter michiganensis strain PF008	28447.7	CP012573	fig|28447.7.peg.1165			PATRIC.28447.7.CP012573.CDS.1214562.1215689.fwd	PATRIC	CDS	1214562	1215689	1128	+	FIG00638284	PLF_1573_00002989	PGF_00085541		375		hypothetical protein
Clavibacter michiganensis strain PF008	28447.7	CP012573	fig|28447.7.peg.1166	AES38_05780		PATRIC.28447.7.CP012573.CDS.1215753.1216223.rev	PATRIC	CDS	1215753	1216223	471	-			PGF_00059570		156		Transcriptional regulator, MarR family
Clavibacter michiganensis strain PF008	28447.7	CP012573	fig|28447.7.peg.1167	AES38_05785		PATRIC.28447.7.CP012573.CDS.1216220.1216978.rev	PATRIC	CDS	1216220	1216978	759	-		PLF_1573_00003218	PGF_01251852		252		hypothetical protein
Clavibacter michiganensis strain PF008	28447.7	CP012573	fig|28447.7.peg.1168	AES38_05790		PATRIC.28447.7.CP012573.CDS.1217036.1217479.rev	PATRIC	CDS	1217036	1217479	444	-		PLF_1573_00000033	PGF_00396707		147		hypothetical protein
Clavibacter michiganensis strain PF008	28447.7	CP012573	fig|28447.7.peg.1169	AES38_05795		PATRIC.28447.7.CP012573.CDS.1217595.1217864.fwd	PATRIC	CDS	1217595	1217864	270	+		PLF_1573_00002743	PGF_00199595		89		hypothetical protein
Clavibacter michiganensis strain PF008	28447.7	CP012573	fig|28447.7.peg.1170	AES38_05800		PATRIC.28447.7.CP012573.CDS.1217932.1219062.fwd	PATRIC	CDS	1217932	1219062	1131	+	FIG00002924	PLF_1573_00000561	PGF_00026447		376		Nucleoside-diphosphate-sugar epimerases
Clavibacter michiganensis strain PF008	28447.7	CP012573	fig|28447.7.peg.1171	AES38_05805		PATRIC.28447.7.CP012573.CDS.1219049.1220320.rev	PATRIC	CDS	1219049	1220320	1272	-	FIG00512076	PLF_1573_00001052	PGF_00409105		423		putative membrane protein
Clavibacter michiganensis strain PF008	28447.7	CP012573	fig|28447.7.peg.1172	AES38_05810		PATRIC.28447.7.CP012573.CDS.1220428.1221306.fwd	PATRIC	CDS	1220428	1221306	879	+	FIG00945885	PLF_1573_00002761	PGF_00164892		292		Methionine ABC transporter ATP-binding protein
Clavibacter michiganensis strain PF008	28447.7	CP012573	fig|28447.7.peg.1173	AES38_05815		PATRIC.28447.7.CP012573.CDS.1221303.1222166.fwd	PATRIC	CDS	1221303	1222166	864	+	FIG00001785	PLF_1573_00000535	PGF_00023002		287		Multidrug ABC transporter, permease protein
Clavibacter michiganensis strain PF008	28447.7	CP012573	fig|28447.7.peg.1174	AES38_05820		PATRIC.28447.7.CP012573.CDS.1222204.1223469.fwd	PATRIC	CDS	1222204	1223469	1266	+	FIG00511281	PLF_1573_00003219	PGF_01251853		421		FIG00511282: hypothetical protein
Clavibacter michiganensis strain PF008	28447.7	CP012573	fig|28447.7.peg.1175	AES38_05825		PATRIC.28447.7.CP012573.CDS.1223466.1224134.fwd	PATRIC	CDS	1223466	1224134	669	+	FIG01402845	PLF_1573_00001127	PGF_00422136		222		DNA-binding response regulator
Clavibacter michiganensis strain PF008	28447.7	CP012573	fig|28447.7.peg.1176	AES38_05830		PATRIC.28447.7.CP012573.CDS.1224430.1225569.fwd	PATRIC	CDS	1224430	1225569	1140	+	FIG00003299	PLF_1573_00002814	PGF_00016042		379		L-arabinose-binding periplasmic protein precursor AraF (TC 3.A.1.2.2)
Clavibacter michiganensis strain PF008	28447.7	CP012573	fig|28447.7.peg.1177	AES38_05835		PATRIC.28447.7.CP012573.CDS.1225696.1227240.fwd	PATRIC	CDS	1225696	1227240	1545	+	FIG00003757	PLF_1573_00000253	PGF_00016031		514		L-arabinose transport ATP-binding protein AraG (TC 3.A.1.2.2)
Clavibacter michiganensis strain PF008	28447.7	CP012573	fig|28447.7.peg.1178	AES38_05840		PATRIC.28447.7.CP012573.CDS.1227237.1228445.fwd	PATRIC	CDS	1227237	1228445	1209	+	FIG00004109	PLF_1573_00000254	PGF_00016035		402		L-arabinose transport system permease protein (TC 3.A.1.2.2)
Clavibacter michiganensis strain PF008	28447.7	CP012573	fig|28447.7.peg.1179	AES38_05845		PATRIC.28447.7.CP012573.CDS.1228533.1229333.rev	PATRIC	CDS	1228533	1229333	801	-	FIG00000015	PLF_1573_00000744	PGF_00052152		266		Signal peptidase I (EC 3.4.21.89)
Clavibacter michiganensis strain PF008	28447.7	CP012573	fig|28447.7.peg.1180	AES38_05850		PATRIC.28447.7.CP012573.CDS.1229368.1230273.rev	PATRIC	CDS	1229368	1230273	906	-	FIG00638284	PLF_1573_00000999	PGF_01253428		301		hypothetical protein
Clavibacter michiganensis strain PF008	28447.7	CP012573	fig|28447.7.peg.1181	AES38_05855		PATRIC.28447.7.CP012573.CDS.1230270.1230905.rev	PATRIC	CDS	1230270	1230905	636	-	FIG00638284	PLF_1573_00002630	PGF_00126214		211		hypothetical protein
Clavibacter michiganensis strain PF008	28447.7	CP012573	fig|28447.7.peg.1182	AES38_05860		PATRIC.28447.7.CP012573.CDS.1231004.1231549.rev	PATRIC	CDS	1231004	1231549	546	-	FIG00511394	PLF_1573_00001000	PGF_01251250		181		FIG00511395: hypothetical protein
Clavibacter michiganensis strain PF008	28447.7	CP012573	fig|28447.7.peg.1183	AES38_05865		PATRIC.28447.7.CP012573.CDS.1231897.1233555.fwd	PATRIC	CDS	1231897	1233555	1659	+	FIG00511761	PLF_1573_00000812	PGF_01253323		552		Two-component sensor kinase yycG (EC 2.7.3.-)
Clavibacter michiganensis strain PF008	28447.7	CP012573	fig|28447.7.peg.1184	AES38_05870		PATRIC.28447.7.CP012573.CDS.1233681.1235510.fwd	PATRIC	CDS	1233681	1235510	1830	+	FIG00012746	PLF_1573_00002295	PGF_00008697		609		Glycine betaine transporter OpuD
Clavibacter michiganensis strain PF008	28447.7	CP012573	fig|28447.7.peg.1185	AES38_05875		PATRIC.28447.7.CP012573.CDS.1235638.1236657.fwd	PATRIC	CDS	1235638	1236657	1020	+	FIG00511343	PLF_1573_00001204	PGF_00419468		339		Conserved protein with diacylglycerol kinase catalytic domain
Clavibacter michiganensis strain PF008	28447.7	CP012573	fig|28447.7.peg.1186	AES38_05880		PATRIC.28447.7.CP012573.CDS.1236704.1237882.fwd	PATRIC	CDS	1236704	1237882	1179	+	FIG01424673	PLF_1573_00001022	PGF_00406089		392		putative RecF protein
Clavibacter michiganensis strain PF008	28447.7	CP012573	fig|28447.7.peg.1187	AES38_05885		PATRIC.28447.7.CP012573.CDS.1237989.1239092.rev	PATRIC	CDS	1237989	1239092	1104	-	FIG00134441	PLF_1573_00002852	PGF_00004066		367		Fatty acid desaturase
Clavibacter michiganensis strain PF008	28447.7	CP012573	fig|28447.7.peg.1188	AES38_05890		PATRIC.28447.7.CP012573.CDS.1239408.1240460.rev	PATRIC	CDS	1239408	1240460	1053	-	FIG01007502	PLF_1573_00001470	PGF_00037648		350		Alcohol dehydrogenase (EC 1.1.1.1)
Clavibacter michiganensis strain PF008	28447.7	CP012573	fig|28447.7.peg.1189			PATRIC.28447.7.CP012573.CDS.1240630.1240920.fwd	PATRIC	CDS	1240630	1240920	291	+					96		hypothetical protein
Clavibacter michiganensis strain PF008	28447.7	CP012573	fig|28447.7.peg.1190			PATRIC.28447.7.CP012573.CDS.1241011.1241400.fwd	PATRIC	CDS	1241011	1241400	390	+					129		hypothetical protein
Clavibacter michiganensis strain PF008	28447.7	CP012573	fig|28447.7.peg.1191	AES38_05900		PATRIC.28447.7.CP012573.CDS.1241397.1242044.fwd	PATRIC	CDS	1241397	1242044	648	+	FIG00791903	PLF_1573_00001935	PGF_00063180		215		Type I restriction-modification system methyltransferase subunit
Clavibacter michiganensis strain PF008	28447.7	CP012573	fig|28447.7.peg.1192	AES38_05905		PATRIC.28447.7.CP012573.CDS.1242078.1245038.rev	PATRIC	CDS	1242078	1245038	2961	-	FIG00009194	PLF_1573_00000841	PGF_01253328		986		alpha-mannosidase
Clavibacter michiganensis strain PF008	28447.7	CP012573	fig|28447.7.peg.1193	AES38_05910		PATRIC.28447.7.CP012573.CDS.1245243.1246151.rev	PATRIC	CDS	1245243	1246151	909	-	FIG00435540	PLF_1573_00000674	PGF_00041722		302		Putative integral membrane transport protein
Clavibacter michiganensis strain PF008	28447.7	CP012573	fig|28447.7.peg.1194	AES38_05915		PATRIC.28447.7.CP012573.CDS.1246154.1247149.rev	PATRIC	CDS	1246154	1247149	996	-	FIG01288623	PLF_1573_00000164	PGF_00004929		331		ABC transporter, permease protein
Clavibacter michiganensis strain PF008	28447.7	CP012573	fig|28447.7.peg.1195	AES38_05920		PATRIC.28447.7.CP012573.CDS.1247153.1248538.rev	PATRIC	CDS	1247153	1248538	1386	-	FIG00013626	PLF_1573_00000543	PGF_00023670		461		N-Acetyl-D-glucosamine ABC transport system, sugar-binding protein
Clavibacter michiganensis strain PF008	28447.7	CP012573	fig|28447.7.peg.1196	AES38_05925		PATRIC.28447.7.CP012573.CDS.1248664.1249929.rev	PATRIC	CDS	1248664	1249929	1266	-	FIG00511465	PLF_1573_00002751	PGF_01251636		421		Probable transcriptional regulator protein
Clavibacter michiganensis strain PF008	28447.7	CP012573	fig|28447.7.peg.1197	AES38_05930		PATRIC.28447.7.CP012573.CDS.1250104.1251231.fwd	PATRIC	CDS	1250104	1251231	1128	+	FIG01550228	PLF_1573_00002099	PGF_00384874		375		FIG00511238: hypothetical protein
Clavibacter michiganensis strain PF008	28447.7	CP012573	fig|28447.7.peg.1198	AES38_05935		PATRIC.28447.7.CP012573.CDS.1251228.1251503.fwd	PATRIC	CDS	1251228	1251503	276	+	FIG01332245	PLF_1573_00001073	PGF_00414801		91		zinc finger, CDGSH-type domain protein
Clavibacter michiganensis strain PF008	28447.7	CP012573	fig|28447.7.peg.1199	AES38_05940		PATRIC.28447.7.CP012573.CDS.1251513.1252421.rev	PATRIC	CDS	1251513	1252421	909	-	FIG00003100	PLF_1573_00001966	PGF_00067402		302		YpfJ protein, zinc metalloprotease superfamily
Clavibacter michiganensis strain PF008	28447.7	CP012573	fig|28447.7.peg.1200	AES38_05945		PATRIC.28447.7.CP012573.CDS.1252453.1253103.rev	PATRIC	CDS	1252453	1253103	651	-	FIG00511888	PLF_1573_00001412	PGF_00421174		216		DNA alkylation repair enzyme
Clavibacter michiganensis strain PF008	28447.7	CP012573	fig|28447.7.peg.1201	AES38_05950		PATRIC.28447.7.CP012573.CDS.1253100.1254113.rev	PATRIC	CDS	1253100	1254113	1014	-	FIG00552385	PLF_1573_00001602	PGF_00026438		337		Nucleoside-diphosphate-sugar epimerases
Clavibacter michiganensis strain PF008	28447.7	CP012573	fig|28447.7.peg.1202	AES38_05955		PATRIC.28447.7.CP012573.CDS.1254228.1254740.rev	PATRIC	CDS	1254228	1254740	513	-	FIG00511186	PLF_1573_00001225	PGF_00422486		170		DUF2017 domain-containing protein
Clavibacter michiganensis strain PF008	28447.7	CP012573	fig|28447.7.peg.1203	AES38_05960		PATRIC.28447.7.CP012573.CDS.1254737.1255111.rev	PATRIC	CDS	1254737	1255111	375	-	FIG00018741	PLF_1573_00001175	PGF_00016362		124		ATP-dependent Clp protease adaptor protein ClpS
Clavibacter michiganensis strain PF008	28447.7	CP012573	fig|28447.7.peg.1204	AES38_05965		PATRIC.28447.7.CP012573.CDS.1255200.1255898.rev	PATRIC	CDS	1255200	1255898	699	-	FIG01307606	PLF_1573_00000243	PGF_00422230		232		DNA-binding response regulator, LuxR family
Clavibacter michiganensis strain PF008	28447.7	CP012573	fig|28447.7.peg.1205	AES38_05970		PATRIC.28447.7.CP012573.CDS.1255895.1257193.rev	PATRIC	CDS	1255895	1257193	1299	-	FIG01197678	PLF_1573_00000684	PGF_00044154		432		Putative signal transduction histidine kinase
Clavibacter michiganensis strain PF008	28447.7	CP012573	fig|28447.7.peg.1206	AES38_05975		PATRIC.28447.7.CP012573.CDS.1257226.1258065.rev	PATRIC	CDS	1257226	1258065	840	-	FIG00672475	PLF_1573_00000210	PGF_00005127		279		ABC transporter, permease protein
Clavibacter michiganensis strain PF008	28447.7	CP012573	fig|28447.7.peg.1207			PATRIC.28447.7.CP012573.CDS.1258032.1259054.fwd	PATRIC	CDS	1258032	1259054	1023	+	FIG00638284				340		hypothetical protein
Clavibacter michiganensis strain PF008	28447.7	CP012573	fig|28447.7.peg.1208	AES38_05985		PATRIC.28447.7.CP012573.CDS.1259127.1260332.rev	PATRIC	CDS	1259127	1260332	1206	-	FIG00719736	PLF_1573_00001332	PGF_00008315		401		Glutamine-dependent 2-keto-4-methylthiobutyrate transaminase
Clavibacter michiganensis strain PF008	28447.7	CP012573	fig|28447.7.peg.1209	AES38_05990		PATRIC.28447.7.CP012573.CDS.1260520.1261071.fwd	PATRIC	CDS	1260520	1261071	552	+					183		hypothetical protein
Clavibacter michiganensis strain PF008	28447.7	CP012573	fig|28447.7.peg.1210			PATRIC.28447.7.CP012573.CDS.1261148.1261372.fwd	PATRIC	CDS	1261148	1261372	225	+					74		hypothetical protein
Clavibacter michiganensis strain PF008	28447.7	CP012573	fig|28447.7.peg.1211	AES38_05995		PATRIC.28447.7.CP012573.CDS.1261392.1261964.fwd	PATRIC	CDS	1261392	1261964	573	+		PLF_1573_00000067	PGF_01253302		190		FIG00733281: hypothetical protein
Clavibacter michiganensis strain PF008	28447.7	CP012573	fig|28447.7.peg.1212	AES38_06000		PATRIC.28447.7.CP012573.CDS.1262164.1263693.fwd	PATRIC	CDS	1262164	1263693	1530	+	FIG01126359	PLF_1573_00000731	PGF_00051271		509		Serine protease
Clavibacter michiganensis strain PF008	28447.7	CP012573	fig|28447.7.peg.1213	AES38_06005		PATRIC.28447.7.CP012573.CDS.1263843.1264916.fwd	PATRIC	CDS	1263843	1264916	1074	+	FIG01499134	PLF_1573_00001830	PGF_00054511		357		Succinoglycan biosynthesis protein ExoA
Clavibacter michiganensis strain PF008	28447.7	CP012573	fig|28447.7.peg.1214	AES38_06010		PATRIC.28447.7.CP012573.CDS.1264913.1265734.fwd	PATRIC	CDS	1264913	1265734	822	+	FIG00001550	PLF_1573_00000794	PGF_00060318		273		Transferase
Clavibacter michiganensis strain PF008	28447.7	CP012573	fig|28447.7.peg.1215	AES38_06015		PATRIC.28447.7.CP012573.CDS.1265731.1266606.fwd	PATRIC	CDS	1265731	1266606	876	+	FIG00007960	PLF_1573_00000185	PGF_00009786		291		Glycosyltransferase
Clavibacter michiganensis strain PF008	28447.7	CP012573	fig|28447.7.peg.1216	AES38_06020		PATRIC.28447.7.CP012573.CDS.1266704.1267987.fwd	PATRIC	CDS	1266704	1267987	1284	+	FIG01410324	PLF_1573_00002210	PGF_00407371		427		putative integral membrane protein
Clavibacter michiganensis strain PF008	28447.7	CP012573	fig|28447.7.peg.1217	AES38_06025		PATRIC.28447.7.CP012573.CDS.1268018.1268767.rev	PATRIC	CDS	1268018	1268767	750	-	FIG00512395	PLF_1573_00002222	PGF_00409083		249		putative membrane protein
Clavibacter michiganensis strain PF008	28447.7	CP012573	fig|28447.7.peg.1218	AES38_06030		PATRIC.28447.7.CP012573.CDS.1268921.1269244.fwd	PATRIC	CDS	1268921	1269244	324	+	FIG00511464	PLF_1573_00001008	PGF_01251257		107		FIG00511465: hypothetical protein
Clavibacter michiganensis strain PF008	28447.7	CP012573	fig|28447.7.peg.1219	AES38_06035		PATRIC.28447.7.CP012573.CDS.1269234.1269545.rev	PATRIC	CDS	1269234	1269545	312	-	FIG00511496	PLF_1573_00000945	PGF_01253394		103		FIG00511498: hypothetical protein
Clavibacter michiganensis strain PF008	28447.7	CP012573	fig|28447.7.peg.1220	AES38_06040		PATRIC.28447.7.CP012573.CDS.1269622.1270410.rev	PATRIC	CDS	1269622	1270410	789	-	FIG01343192	PLF_1573_00000625	PGF_00034787		262		Polysaccharide ABC transporter, ATP-binding protein
Clavibacter michiganensis strain PF008	28447.7	CP012573	fig|28447.7.peg.1221	AES38_06045		PATRIC.28447.7.CP012573.CDS.1270410.1271231.rev	PATRIC	CDS	1270410	1271231	822	-	FIG00521220	PLF_1573_00001605	PGF_00026674		273		O-antigen export system permease protein RfbD
Clavibacter michiganensis strain PF008	28447.7	CP012573	fig|28447.7.peg.1222	AES38_06050		PATRIC.28447.7.CP012573.CDS.1271244.1271936.rev	PATRIC	CDS	1271244	1271936	693	-	FIG01371138	PLF_1573_00001939	PGF_00063991		230		UDP-N-acetylglucosamine pyrophosphorylase related protein
Clavibacter michiganensis strain PF008	28447.7	CP012573	fig|28447.7.peg.1223	AES38_06055		PATRIC.28447.7.CP012573.CDS.1272228.1273913.fwd	PATRIC	CDS	1272228	1273913	1686	+	FIG00765385	PLF_1573_00001191	PGF_00003367		561		ABC transporter, ATP-binding protein
Clavibacter michiganensis strain PF008	28447.7	CP012573	fig|28447.7.peg.1224	AES38_06060		PATRIC.28447.7.CP012573.CDS.1273889.1275460.fwd	PATRIC	CDS	1273889	1275460	1572	+	FIG00435540	PLF_1573_00000673	PGF_00041737		523		Putative integral membrane transport protein
Clavibacter michiganensis strain PF008	28447.7	CP012573	fig|28447.7.peg.1225	AES38_06065		PATRIC.28447.7.CP012573.CDS.1275522.1275809.fwd	PATRIC	CDS	1275522	1275809	288	+	FIG00511459	PLF_1573_00002176	PGF_00251055		95		FIG00511460: hypothetical protein
Clavibacter michiganensis strain PF008	28447.7	CP012573	fig|28447.7.peg.1226			PATRIC.28447.7.CP012573.CDS.1276050.1277150.rev	PATRIC	CDS	1276050	1277150	1101	-	FIG00000387	PLF_1573_00001594	PGF_00025600		366		Nicotinate phosphoribosyltransferase (EC 6.3.4.21)
Clavibacter michiganensis strain PF008	28447.7	CP012573	fig|28447.7.peg.1227	AES38_06075		PATRIC.28447.7.CP012573.CDS.1277242.1278705.fwd	PATRIC	CDS	1277242	1278705	1464	+	FIG00512570	PLF_1573_00001233	PGF_00422947		487		Deoxyribodipyrimidine photolyase-related protein
Clavibacter michiganensis strain PF008	28447.7	CP012573	fig|28447.7.peg.1228	AES38_06080		PATRIC.28447.7.CP012573.CDS.1278764.1279660.fwd	PATRIC	CDS	1278764	1279660	897	+	FIG00000397	PLF_1573_00001326	PGF_00008106		298		Glutamate racemase (EC 5.1.1.3)
Clavibacter michiganensis strain PF008	28447.7	CP012573	fig|28447.7.peg.1229	AES38_06085		PATRIC.28447.7.CP012573.CDS.1279657.1280394.fwd	PATRIC	CDS	1279657	1280394	738	+	FIG00135600	PLF_1573_00001765	PGF_00048586		245	rph	Ribonuclease PH (EC 2.7.7.56)
Clavibacter michiganensis strain PF008	28447.7	CP012573	fig|28447.7.peg.1230	AES38_06090		PATRIC.28447.7.CP012573.CDS.1280406.1281014.fwd	PATRIC	CDS	1280406	1281014	609	+	FIG00000584	PLF_1573_00001600	PGF_00026362		202		Nucleoside 5-triphosphatase RdgB (dHAPTP, dITP, XTP-specific) (EC 3.6.1.15)
Clavibacter michiganensis strain PF008	28447.7	CP012573	fig|28447.7.peg.1231	AES38_06095		PATRIC.28447.7.CP012573.CDS.1281105.1282022.fwd	PATRIC	CDS	1281105	1282022	918	+	FIG00000503	PLF_1573_00001218	PGF_00418349		305		Cobalt-zinc-cadmium resistance protein CzcD
Clavibacter michiganensis strain PF008	28447.7	CP012573	fig|28447.7.peg.1232	AES38_06100		PATRIC.28447.7.CP012573.CDS.1282063.1282791.rev	PATRIC	CDS	1282063	1282791	729	-	FIG00002761	PLF_1573_00001226	PGF_00422720		242		DedA protein
Clavibacter michiganensis strain PF008	28447.7	CP012573	fig|28447.7.peg.1233	AES38_06105		PATRIC.28447.7.CP012573.CDS.1282916.1283839.rev	PATRIC	CDS	1282916	1283839	924	-		PLF_1573_00003176	PGF_00411433		307		pyridoxal phosphate-dependent deaminase, putative
Clavibacter michiganensis strain PF008	28447.7	CP012573	fig|28447.7.peg.1234	AES38_06115		PATRIC.28447.7.CP012573.CDS.1284017.1285450.fwd	PATRIC	CDS	1284017	1285450	1434	+	FIG00000793	PLF_1573_00002549	PGF_00067123		477		Xylulose kinase (EC 2.7.1.17)
Clavibacter michiganensis strain PF008	28447.7	CP012573	fig|28447.7.peg.1235	AES38_06120		PATRIC.28447.7.CP012573.CDS.1285522.1286751.fwd	PATRIC	CDS	1285522	1286751	1230	+	FIG00001036	PLF_1573_00002541	PGF_00063416		409		Type II/IV secretion system ATP hydrolase TadA/VirB11/CpaF, TadA subfamily
Clavibacter michiganensis strain PF008	28447.7	CP012573	fig|28447.7.peg.1236	AES38_06125		PATRIC.28447.7.CP012573.CDS.1286748.1287611.fwd	PATRIC	CDS	1286748	1287611	864	+	FIG00015316	PLF_1573_00001306	PGF_00006015		287		Flp pilus assembly protein TadB
Clavibacter michiganensis strain PF008	28447.7	CP012573	fig|28447.7.peg.1237	AES38_06130		PATRIC.28447.7.CP012573.CDS.1287608.1288558.fwd	PATRIC	CDS	1287608	1288558	951	+	FIG00139157	PLF_1573_00000817	PGF_00063437		316		Type II/IV secretion system protein TadC, associated with Flp pilus assembly
Clavibacter michiganensis strain PF008	28447.7	CP012573	fig|28447.7.peg.1238	AES38_06135		PATRIC.28447.7.CP012573.CDS.1288610.1288804.fwd	PATRIC	CDS	1288610	1288804	195	+	FIG00512156	PLF_1573_00000944	PGF_00197676		64		FIG00512157: hypothetical protein
Clavibacter michiganensis strain PF008	28447.7	CP012573	fig|28447.7.peg.1239	AES38_06140		PATRIC.28447.7.CP012573.CDS.1288804.1289181.fwd	PATRIC	CDS	1288804	1289181	378	+	FIG00672847	PLF_1573_00001049	PGF_00408901		125		putative membrane protein
Clavibacter michiganensis strain PF008	28447.7	CP012573	fig|28447.7.peg.1240	AES38_06145		PATRIC.28447.7.CP012573.CDS.1289156.1289611.fwd	PATRIC	CDS	1289156	1289611	456	+	FIG01664949	PLF_1573_00002227	PGF_01251474		151		putative membrane/secreted protein
Clavibacter michiganensis strain PF008	28447.7	CP012573	fig|28447.7.peg.1241	AES38_06150		PATRIC.28447.7.CP012573.CDS.1289611.1290150.fwd	PATRIC	CDS	1289611	1290150	540	+	FIG00672847	PLF_1573_00001048	PGF_01251266		179		putative membrane protein
Clavibacter michiganensis strain PF008	28447.7	CP012573	fig|28447.7.peg.1242	AES38_06155		PATRIC.28447.7.CP012573.CDS.1290188.1291495.rev	PATRIC	CDS	1290188	1291495	1308	-	FIG00512620	PLF_1573_00000692	PGF_00045231		435		Putative transporter
Clavibacter michiganensis strain PF008	28447.7	CP012573	fig|28447.7.peg.1243	AES38_06160		PATRIC.28447.7.CP012573.CDS.1291589.1292692.fwd	PATRIC	CDS	1291589	1292692	1104	+	FIG01255877	PLF_1573_00002445	PGF_00030641		367	prfB	Peptide chain release factor 2
Clavibacter michiganensis strain PF008	28447.7	CP012573	fig|28447.7.peg.1244	AES38_06165		PATRIC.28447.7.CP012573.CDS.1292768.1294393.fwd	PATRIC	CDS	1292768	1294393	1626	+	FIG00002914	PLF_1573_00002319	PGF_00003367		541		ABC transporter, ATP-binding protein
Clavibacter michiganensis strain PF008	28447.7	CP012573	fig|28447.7.peg.1245	AES38_06170		PATRIC.28447.7.CP012573.CDS.1294390.1295307.fwd	PATRIC	CDS	1294390	1295307	918	+	FIG00000552	PLF_1573_00001486	PGF_00417076		305		Cell division protein FtsX
Clavibacter michiganensis strain PF008	28447.7	CP012573	fig|28447.7.peg.1246	AES38_06175		PATRIC.28447.7.CP012573.CDS.1295374.1295850.fwd	PATRIC	CDS	1295374	1295850	477	+	FIG00000194	PLF_1573_00002249	PGF_00413554		158		tmRNA-binding protein SmpB
Clavibacter michiganensis strain PF008	28447.7	CP012573	fig|28447.7.peg.1247	AES38_06180		PATRIC.28447.7.CP012573.CDS.1296470.1298284.rev	PATRIC	CDS	1296470	1298284	1815	-	FIG00006997	PLF_1573_00000454	PGF_00004493		604		Ferric iron ABC transporter, permease protein
Clavibacter michiganensis strain PF008	28447.7	CP012573	fig|28447.7.peg.1248	AES38_06185		PATRIC.28447.7.CP012573.CDS.1298287.1299315.rev	PATRIC	CDS	1298287	1299315	1029	-	FIG00007514	PLF_1573_00000162	PGF_00003367		342		ABC transporter, ATP-binding protein
Clavibacter michiganensis strain PF008	28447.7	CP012573	fig|28447.7.peg.1249	AES38_06190		PATRIC.28447.7.CP012573.CDS.1299315.1300394.rev	PATRIC	CDS	1299315	1300394	1080	-	FIG00511483	PLF_1573_00000165	PGF_00005870		359		ABC transporter, substrate-binding protein
Clavibacter michiganensis strain PF008	28447.7	CP012573	fig|28447.7.peg.1250	AES38_06195		PATRIC.28447.7.CP012573.CDS.1300614.1302125.fwd	PATRIC	CDS	1300614	1302125	1512	+	FIG01336429	PLF_1573_00000689	PGF_00044542		503		Putative transmembrane efflux protein
Clavibacter michiganensis strain PF008	28447.7	CP012573	fig|28447.7.peg.1251	AES38_06200		PATRIC.28447.7.CP012573.CDS.1302148.1302960.rev	PATRIC	CDS	1302148	1302960	813	-	FIG00001748	PLF_1573_00000409	PGF_00011993		270		Histidinol-phosphatase [alternative form] (EC 3.1.3.15)
Clavibacter michiganensis strain PF008	28447.7	CP012573	fig|28447.7.peg.1252	AES38_06205		PATRIC.28447.7.CP012573.CDS.1302971.1304047.rev	PATRIC	CDS	1302971	1304047	1077	-	FIG00000464	PLF_1573_00000721	PGF_00048928		358		Ribosome small subunit-stimulated GTPase EngC
Clavibacter michiganensis strain PF008	28447.7	CP012573	fig|28447.7.peg.1253	AES38_06210		PATRIC.28447.7.CP012573.CDS.1304044.1305507.rev	PATRIC	CDS	1304044	1305507	1464	-	FIG00075970	PLF_1573_00001384	PGF_00426117		487		5-Enolpyruvylshikimate-3-phosphate synthase (EC 2.5.1.19)
Clavibacter michiganensis strain PF008	28447.7	CP012573	fig|28447.7.peg.1254	AES38_06215		PATRIC.28447.7.CP012573.CDS.1305572.1306396.fwd	PATRIC	CDS	1305572	1306396	825	+	FIG00014368	PLF_1573_00000699	PGF_00046311		274		RNA polymerase sigma factor
Clavibacter michiganensis strain PF008	28447.7	CP012573	fig|28447.7.peg.1255	AES38_06220		PATRIC.28447.7.CP012573.CDS.1306393.1306635.fwd	PATRIC	CDS	1306393	1306635	243	+	FIG00512120	PLF_1573_00001007	PGF_01251256		80		FIG00512122: hypothetical protein
Clavibacter michiganensis strain PF008	28447.7	CP012573	fig|28447.7.peg.1256	AES38_06225		PATRIC.28447.7.CP012573.CDS.1306671.1307111.fwd	PATRIC	CDS	1306671	1307111	441	+	FIG00512545	PLF_1573_00000943	PGF_01253393		146		FIG00512546: hypothetical protein
Clavibacter michiganensis strain PF008	28447.7	CP012573	fig|28447.7.peg.1257	AES38_06230		PATRIC.28447.7.CP012573.CDS.1307186.1311079.rev	PATRIC	CDS	1307186	1311079	3894	-	FIG00004392	PLF_1573_00000158	PGF_00423351		1297	kgd	Dihydrolipoamide succinyltransferase component (E2) of 2-oxoglutarate dehydrogenase complex (EC 2.3.1.61) / 2-oxoglutarate dehydrogenase E1 component (EC 1.2.4.2) @ 2-oxoglutarate decarboxylase (EC 4.1.1.71) @ 2-hydroxy-3-oxoadipate synthase (EC 2.2.1.5)
Clavibacter michiganensis strain PF008	28447.7	CP012573	fig|28447.7.peg.1258	AES38_06235		PATRIC.28447.7.CP012573.CDS.1311183.1312622.fwd	PATRIC	CDS	1311183	1312622	1440	+	FIG00020613	PLF_1573_00001450	PGF_00014311		479		Inosine-5'-monophosphate dehydrogenase (EC 1.1.1.205) / CBS domain
Clavibacter michiganensis strain PF008	28447.7	CP012573	fig|28447.7.peg.1259	AES38_06240		PATRIC.28447.7.CP012573.CDS.1312736.1314166.fwd	PATRIC	CDS	1312736	1314166	1431	+	FIG00936959	PLF_1573_00001945	PGF_00064173		476		UPF0053 protein Rv1842c/MT1890
Clavibacter michiganensis strain PF008	28447.7	CP012573	fig|28447.7.peg.1260	AES38_06245		PATRIC.28447.7.CP012573.CDS.1314159.1315202.fwd	PATRIC	CDS	1314159	1315202	1044	+	FIG01124584	PLF_1573_00001034	PGF_00407648		347		putative integral membrane protein
Clavibacter michiganensis strain PF008	28447.7	CP012573	fig|28447.7.peg.1261	AES38_06250		PATRIC.28447.7.CP012573.CDS.1315268.1316347.rev	PATRIC	CDS	1315268	1316347	1080	-	FIG01400118	PLF_1573_00002433	PGF_00024657		359		NADH-dependent flavin oxidoreductase
Clavibacter michiganensis strain PF008	28447.7	CP012573	fig|28447.7.peg.1262	AES38_06255		PATRIC.28447.7.CP012573.CDS.1316431.1317366.fwd	PATRIC	CDS	1316431	1317366	936	+	FIG00001859	PLF_1573_00002382	PGF_00013031		311		ADP-dependent (S)-NAD(P)H-hydrate dehydratase (EC 4.2.1.136)
Clavibacter michiganensis strain PF008	28447.7	CP012573	fig|28447.7.peg.1263	AES38_06260		PATRIC.28447.7.CP012573.CDS.1317363.1318040.rev	PATRIC	CDS	1317363	1318040	678	-	FIG00512185	PLF_1573_00002718	PGF_00410483		225		putative secreted protein
Clavibacter michiganensis strain PF008	28447.7	CP012573	fig|28447.7.peg.1264	AES38_06265		PATRIC.28447.7.CP012573.CDS.1318255.1318572.fwd	PATRIC	CDS	1318255	1318572	318	+	FIG00514618	PLF_1573_00000992	PGF_00282778		105		FIG00544011: hypothetical protein
Clavibacter michiganensis strain PF008	28447.7	CP012573	fig|28447.7.peg.1265	AES38_06270		PATRIC.28447.7.CP012573.CDS.1318625.1319905.fwd	PATRIC	CDS	1318625	1319905	1281	+	FIG00815500	PLF_1573_00000291	PGF_01251669		426		MFS transporter
Clavibacter michiganensis strain PF008	28447.7	CP012573	fig|28447.7.peg.1266	AES38_06275		PATRIC.28447.7.CP012573.CDS.1319943.1320599.rev	PATRIC	CDS	1319943	1320599	657	-	FIG01402845	PLF_1573_00000815	PGF_00063031		218		Two-component system, regulatory protein
Clavibacter michiganensis strain PF008	28447.7	CP012573	fig|28447.7.peg.1267	AES38_06280		PATRIC.28447.7.CP012573.CDS.1320626.1321858.rev	PATRIC	CDS	1320626	1321858	1233	-	FIG00512466	PLF_1573_00000091	PGF_00272574		410		FIG00512468: hypothetical protein
Clavibacter michiganensis strain PF008	28447.7	CP012573	fig|28447.7.peg.1268	AES38_06285		PATRIC.28447.7.CP012573.CDS.1321855.1323009.rev	PATRIC	CDS	1321855	1323009	1155	-	FIG01757518	PLF_1573_00002538	PGF_00062995		384		Two-component system sensor protein
Clavibacter michiganensis strain PF008	28447.7	CP012573	fig|28447.7.peg.1269	AES38_06290		PATRIC.28447.7.CP012573.CDS.1323167.1323847.rev	PATRIC	CDS	1323167	1323847	681	-	FIG00512544	PLF_1573_00000814	PGF_01253324		226		Two-component system, regulatory protein
Clavibacter michiganensis strain PF008	28447.7	CP012573	fig|28447.7.peg.1270	AES38_06295		PATRIC.28447.7.CP012573.CDS.1323971.1325182.rev	PATRIC	CDS	1323971	1325182	1212	-	FIG00000716	PLF_1573_00000416	PGF_00012332		403		Homoserine O-acetyltransferase (EC 2.3.1.31)
Clavibacter michiganensis strain PF008	28447.7	CP012573	fig|28447.7.peg.1271	AES38_06300		PATRIC.28447.7.CP012573.CDS.1325224.1326594.rev	PATRIC	CDS	1325224	1326594	1371	-	FIG00000417	PLF_1573_00001603	PGF_00026639		456		O-acetylhomoserine sulfhydrylase (EC 2.5.1.49) / O-succinylhomoserine sulfhydrylase (EC 2.5.1.48)
Clavibacter michiganensis strain PF008	28447.7	CP012573	fig|28447.7.peg.1272	AES38_06305		PATRIC.28447.7.CP012573.CDS.1326731.1327528.fwd	PATRIC	CDS	1326731	1327528	798	+	FIG01310822	PLF_1573_00001619	PGF_00028632		265		Oxidoreductase
Clavibacter michiganensis strain PF008	28447.7	CP012573	fig|28447.7.peg.1273	AES38_06310		PATRIC.28447.7.CP012573.CDS.1327561.1328235.rev	PATRIC	CDS	1327561	1328235	675	-	FIG00554417	PLF_1573_00000778	PGF_00058916		224		Transcriptional regulator, AcrR family
Clavibacter michiganensis strain PF008	28447.7	CP012573	fig|28447.7.peg.1274	AES38_06315		PATRIC.28447.7.CP012573.CDS.1328386.1329426.fwd	PATRIC	CDS	1328386	1329426	1041	+	FIG00948083	PLF_1573_00001464	PGF_00014724		346		Integral membrane protein TerC
Clavibacter michiganensis strain PF008	28447.7	CP012573	fig|28447.7.peg.1275	AES38_06320		PATRIC.28447.7.CP012573.CDS.1329423.1330223.fwd	PATRIC	CDS	1329423	1330223	801	+	FIG00512619	PLF_1573_00002468	PGF_01251519		266		Protein phosphatase
Clavibacter michiganensis strain PF008	28447.7	CP012573	fig|28447.7.peg.1276	AES38_06325		PATRIC.28447.7.CP012573.CDS.1330303.1331772.fwd	PATRIC	CDS	1330303	1331772	1470	+	FIG00000280	PLF_1573_00000376	PGF_00419420		489		3-isopropylmalate dehydratase large subunit (EC 4.2.1.33)
Clavibacter michiganensis strain PF008	28447.7	CP012573	fig|28447.7.peg.1277	AES38_06330		PATRIC.28447.7.CP012573.CDS.1331775.1332389.fwd	PATRIC	CDS	1331775	1332389	615	+	FIG00000282	PLF_1573_00000458	PGF_00419450		204		3-isopropylmalate dehydratase small subunit (EC 4.2.1.33)
Clavibacter michiganensis strain PF008	28447.7	CP012573	fig|28447.7.peg.1278	AES38_06335		PATRIC.28447.7.CP012573.CDS.1332390.1333760.fwd	PATRIC	CDS	1332390	1333760	1371	+	FIG00034392	PLF_1573_00001938	PGF_00063978		456		UDP-N-acetylglucosamine 1-carboxyvinyltransferase (EC 2.5.1.7)
Clavibacter michiganensis strain PF008	28447.7	CP012573	fig|28447.7.peg.1279	AES38_06340		PATRIC.28447.7.CP012573.CDS.1333888.1334625.fwd	PATRIC	CDS	1333888	1334625	738	+	FIG00005243	PLF_1573_00000130	PGF_00033589		245		Acyl-CoA:1-acyl-sn-glycerol-3-phosphate acyltransferase (EC 2.3.1.51)
Clavibacter michiganensis strain PF008	28447.7	CP012573	fig|28447.7.peg.1280	AES38_06345		PATRIC.28447.7.CP012573.CDS.1334618.1335688.fwd	PATRIC	CDS	1334618	1335688	1071	+	FIG00000309	PLF_1573_00000144	PGF_00008611		356		Glycerol-3-phosphate dehydrogenase [NAD(P)+] (EC 1.1.1.94)
Clavibacter michiganensis strain PF008	28447.7	CP012573	fig|28447.7.peg.1281	AES38_06350		PATRIC.28447.7.CP012573.CDS.1335691.1336800.fwd	PATRIC	CDS	1335691	1336800	1110	+	FIG00000350	PLF_1573_00000394	PGF_00420798		369		D-alanine--D-alanine ligase (EC 6.3.2.4)
Clavibacter michiganensis strain PF008	28447.7	CP012573	fig|28447.7.peg.1282	AES38_06355		PATRIC.28447.7.CP012573.CDS.1336894.1337760.fwd	PATRIC	CDS	1336894	1337760	867	+	FIG00687685	PLF_1573_00000670	PGF_00041183		288		Putative glycosyltransferase
Clavibacter michiganensis strain PF008	28447.7	CP012573	fig|28447.7.peg.1283	AES38_06360		PATRIC.28447.7.CP012573.CDS.1337717.1338229.rev	PATRIC	CDS	1337717	1338229	513	-		PLF_1573_00002214	PGF_01251472		170		putative lipoprotein
Clavibacter michiganensis strain PF008	28447.7	CP012573	fig|28447.7.peg.1284	AES38_06365		PATRIC.28447.7.CP012573.CDS.1338245.1339363.fwd	PATRIC	CDS	1338245	1339363	1119	+	FIG00000570	PLF_1573_00001844	PGF_00056540		372		Thiamine-monophosphate kinase (EC 2.7.4.16)
Clavibacter michiganensis strain PF008	28447.7	CP012573	fig|28447.7.peg.1285			PATRIC.28447.7.CP012573.CDS.1339360.1339659.rev	PATRIC	CDS	1339360	1339659	300	-		PLF_1573_00000342	PGF_00009500		99		16S rRNA (guanine(966)-N(2))-methyltransferase (EC 2.1.1.171)
Clavibacter michiganensis strain PF008	28447.7	CP012573	fig|28447.7.peg.1286	AES38_06375		PATRIC.28447.7.CP012573.CDS.1340117.1341211.fwd	PATRIC	CDS	1340117	1341211	1095	+	FIG00006676	PLF_1573_00001372	PGF_00002674		364		FIG022979: MoxR-like ATPases
Clavibacter michiganensis strain PF008	28447.7	CP012573	fig|28447.7.peg.1287	AES38_06380		PATRIC.28447.7.CP012573.CDS.1341216.1342538.fwd	PATRIC	CDS	1341216	1342538	1323	+	FIG00002343	PLF_1573_00002331	PGF_00425783		440		FIG002343: hypothetical protein
Clavibacter michiganensis strain PF008	28447.7	CP012573	fig|28447.7.peg.1288	AES38_06385		PATRIC.28447.7.CP012573.CDS.1342535.1345051.fwd	PATRIC	CDS	1342535	1345051	2517	+	FIG00001454	PLF_1573_00001357	PGF_00425715		838		FIG001454: Transglutaminase-like enzymes, putative cysteine proteases
Clavibacter michiganensis strain PF008	28447.7	CP012573	fig|28447.7.peg.1289	AES38_06390		PATRIC.28447.7.CP012573.CDS.1345048.1347231.fwd	PATRIC	CDS	1345048	1347231	2184	+	FIG00021289	PLF_1573_00000179	PGF_00016611		727		ATP-dependent DNA helicase RecG (EC 3.6.4.12)
Clavibacter michiganensis strain PF008	28447.7	CP012573	fig|28447.7.peg.1290	AES38_06395		PATRIC.28447.7.CP012573.CDS.1347258.1347749.fwd	PATRIC	CDS	1347258	1347749	492	+	FIG00000261	PLF_1573_00000616	PGF_00033877		163		Phosphopantetheine adenylyltransferase (EC 2.7.7.3)
Clavibacter michiganensis strain PF008	28447.7	CP012573	fig|28447.7.peg.1291	AES38_06400		PATRIC.28447.7.CP012573.CDS.1347769.1348341.fwd	PATRIC	CDS	1347769	1348341	573	+	FIG01269488	PLF_1573_00000399	PGF_00002410		190		FIG01269488: protein, clustered with ribosomal protein L32p
Clavibacter michiganensis strain PF008	28447.7	CP012573	fig|28447.7.peg.1292	AES38_06405		PATRIC.28447.7.CP012573.CDS.1348344.1348547.fwd	PATRIC	CDS	1348344	1348547	204	+	FIG00006632	PLF_1573_00001255	PGF_00016407		67		LSU ribosomal protein L32p @ LSU ribosomal protein L32p, zinc-independent
Clavibacter michiganensis strain PF008	28447.7	CP012573	fig|28447.7.peg.1293	AES38_06410		PATRIC.28447.7.CP012573.CDS.1348573.1349289.fwd	PATRIC	CDS	1348573	1349289	717	+	FIG00000208	PLF_1573_00001762	PGF_00048563		238		Ribonuclease III (EC 3.1.26.3)
Clavibacter michiganensis strain PF008	28447.7	CP012573	fig|28447.7.peg.1294	AES38_06415		PATRIC.28447.7.CP012573.CDS.1349296.1350231.fwd	PATRIC	CDS	1349296	1350231	936	+	FIG00035634	PLF_1573_00001308	PGF_00006124		311		Formamidopyrimidine-DNA glycosylase (EC 3.2.2.23)
Clavibacter michiganensis strain PF008	28447.7	CP012573	fig|28447.7.peg.1295	AES38_06420		PATRIC.28447.7.CP012573.CDS.1350265.1351383.rev	PATRIC	CDS	1350265	1351383	1119	-	FIG01272034	PLF_1573_00001573	PGF_00024018		372		N-acetyltransferase, GCN5-family
Clavibacter michiganensis strain PF008	28447.7	CP012573	fig|28447.7.peg.1296	AES38_06425		PATRIC.28447.7.CP012573.CDS.1351542.1355267.fwd	PATRIC	CDS	1351542	1355267	3726	+	FIG00026918	PLF_1573_00000235	PGF_00417968		1241		Chromosome partition protein smc
Clavibacter michiganensis strain PF008	28447.7	CP012573	fig|28447.7.peg.1297	AES38_06430		PATRIC.28447.7.CP012573.CDS.1355288.1356160.fwd	PATRIC	CDS	1355288	1356160	873	+	FIG00000095	PLF_1573_00001815	PGF_00052246		290		Signal recognition particle receptor FtsY
Clavibacter michiganensis strain PF008	28447.7	CP012573	fig|28447.7.peg.1298	AES38_06435		PATRIC.28447.7.CP012573.CDS.1356323.1357894.fwd	PATRIC	CDS	1356323	1357894	1572	+	FIG00000113	PLF_1573_00001814	PGF_00052238		523		Signal recognition particle protein Ffh
Clavibacter michiganensis strain PF008	28447.7	CP012573	fig|28447.7.peg.1299	AES38_06440		PATRIC.28447.7.CP012573.CDS.1357981.1359174.rev	PATRIC	CDS	1357981	1359174	1194	-	FIG00511361	PLF_1573_00001806	PGF_01251331		397		Serine protease
Clavibacter michiganensis strain PF008	28447.7	CP012573	fig|28447.7.peg.1300	AES38_06445		PATRIC.28447.7.CP012573.CDS.1359194.1360345.rev	PATRIC	CDS	1359194	1360345	1152	-	FIG00904518	PLF_1573_00000942	PGF_00251055		383		FIG074102: hypothetical protein
Clavibacter michiganensis strain PF008	28447.7	CP012573	fig|28447.7.peg.1301	AES38_06450		PATRIC.28447.7.CP012573.CDS.1360600.1361013.fwd	PATRIC	CDS	1360600	1361013	414	+	FIG00000193	PLF_1573_00001786	PGF_00049849		137		SSU ribosomal protein S16p
Clavibacter michiganensis strain PF008	28447.7	CP012573	fig|28447.7.peg.1302	AES38_06455		PATRIC.28447.7.CP012573.CDS.1361017.1361253.fwd	PATRIC	CDS	1361017	1361253	237	+	FIG00005628	PLF_1573_00002281	PGF_00015811		78		KH domain RNA binding protein YlqC
Clavibacter michiganensis strain PF008	28447.7	CP012573	fig|28447.7.peg.1303	AES38_06460		PATRIC.28447.7.CP012573.CDS.1361231.1361860.fwd	PATRIC	CDS	1361231	1361860	630	+	FIG00000312	PLF_1573_00001084	PGF_00010685		209		16S rRNA processing protein RimM
Clavibacter michiganensis strain PF008	28447.7	CP012573	fig|28447.7.peg.1304	AES38_06465		PATRIC.28447.7.CP012573.CDS.1361862.1362548.fwd	PATRIC	CDS	1361862	1362548	687	+	FIG00000230	PLF_1573_00001067	PGF_00413208		228		tRNA (guanine(37)-N(1))-methyltransferase (EC 2.1.1.228)
Clavibacter michiganensis strain PF008	28447.7	CP012573	fig|28447.7.peg.1305	AES38_06470		PATRIC.28447.7.CP012573.CDS.1362591.1363358.rev	PATRIC	CDS	1362591	1363358	768	-	FIG00000036	PLF_1573_00000519	PGF_00020735		255		Methionine aminopeptidase (EC 3.4.11.18)
Clavibacter michiganensis strain PF008	28447.7	CP012573	fig|28447.7.peg.1306	AES38_06475		PATRIC.28447.7.CP012573.CDS.1363432.1363923.fwd	PATRIC	CDS	1363432	1363923	492	+	FIG00511660	PLF_1573_00000941	PGF_01253392		163		FIG00511661: hypothetical protein
Clavibacter michiganensis strain PF008	28447.7	CP012573	fig|28447.7.peg.1307	AES38_06480		PATRIC.28447.7.CP012573.CDS.1364097.1364441.fwd	PATRIC	CDS	1364097	1364441	345	+	FIG00000214	PLF_1573_00002341	PGF_00016355		114	rplS	LSU ribosomal protein L19p
Clavibacter michiganensis strain PF008	28447.7	CP012573	fig|28447.7.peg.1308	AES38_06485		PATRIC.28447.7.CP012573.CDS.1364508.1365260.fwd	PATRIC	CDS	1364508	1365260	753	+	FIG00000015	PLF_1573_00001811	PGF_00052152		250		Signal peptidase I (EC 3.4.21.89)
Clavibacter michiganensis strain PF008	28447.7	CP012573	fig|28447.7.peg.1309	AES38_06490		PATRIC.28447.7.CP012573.CDS.1365260.1365919.fwd	PATRIC	CDS	1365260	1365919	660	+	FIG00000126	PLF_1573_00001761	PGF_00048556		219		Ribonuclease HII (EC 3.1.26.4)
Clavibacter michiganensis strain PF008	28447.7	CP012573	fig|28447.7.peg.1310	AES38_06495		PATRIC.28447.7.CP012573.CDS.1366010.1366333.fwd	PATRIC	CDS	1366010	1366333	324	+	FIG00004032	PLF_1573_00001694	PGF_00038579		107		Protein often found in Actinomycetes clustered with signal peptidase and/or RNaseHII
Clavibacter michiganensis strain PF008	28447.7	CP012573	fig|28447.7.peg.1311	AES38_06500		PATRIC.28447.7.CP012573.CDS.1366444.1366800.fwd	PATRIC	CDS	1366444	1366800	357	+	FIG00009496	PLF_1573_00000846	PGF_01253329		118		endonuclease( EC:3.1.- )
Clavibacter michiganensis strain PF008	28447.7	CP012573	fig|28447.7.peg.1312	AES38_06505		PATRIC.28447.7.CP012573.CDS.1366800.1368356.fwd	PATRIC	CDS	1366800	1368356	1557	+	FIG00000635	PLF_1573_00000292	PGF_00018338		518		MG(2+) CHELATASE FAMILY PROTEIN / ComM-related protein
Clavibacter michiganensis strain PF008	28447.7	CP012573	fig|28447.7.peg.1313	AES38_06510		PATRIC.28447.7.CP012573.CDS.1368494.1369873.fwd	PATRIC	CDS	1368494	1369873	1380	+	FIG00035268	PLF_1573_00000723	PGF_00049202		459		Rossmann fold nucleotide-binding protein Smf possibly involved in DNA uptake
Clavibacter michiganensis strain PF008	28447.7	CP012573	fig|28447.7.peg.1314	AES38_06515		PATRIC.28447.7.CP012573.CDS.1370032.1371015.fwd	PATRIC	CDS	1370032	1371015	984	+	FIG00600726	PLF_1573_00000748	PGF_00052936		327		Site-specific tyrosine recombinase XerC
Clavibacter michiganensis strain PF008	28447.7	CP012573	fig|28447.7.peg.1315	AES38_06520		PATRIC.28447.7.CP012573.CDS.1371108.1371656.rev	PATRIC	CDS	1371108	1371656	549	-	FIG00011382	PLF_1573_00000311	PGF_00020086		182		Membrane proteins related to metalloendopeptidases
Clavibacter michiganensis strain PF008	28447.7	CP012573	fig|28447.7.peg.1316	AES38_06525		PATRIC.28447.7.CP012573.CDS.1371757.1373232.fwd	PATRIC	CDS	1371757	1373232	1476	+	FIG00435857	PLF_1573_00000332	PGF_00008014		491		Glucose/mannose:H+ symporter GlcP
Clavibacter michiganensis strain PF008	28447.7	CP012573	fig|28447.7.peg.1317	AES38_06530		PATRIC.28447.7.CP012573.CDS.1373460.1374407.fwd	PATRIC	CDS	1373460	1374407	948	+	FIG00037273	PLF_1573_00001791	PGF_00049882		315		SSU ribosomal protein S2p (SAe)
Clavibacter michiganensis strain PF008	28447.7	CP012573	fig|28447.7.peg.1318	AES38_06535		PATRIC.28447.7.CP012573.CDS.1374519.1375346.fwd	PATRIC	CDS	1374519	1375346	828	+	FIG00000191	PLF_1573_00001904	PGF_00060427		275		Translation elongation factor Ts
Clavibacter michiganensis strain PF008	28447.7	CP012573	fig|28447.7.peg.1319	AES38_06540		PATRIC.28447.7.CP012573.CDS.1375505.1376221.fwd	PATRIC	CDS	1375505	1376221	717	+	FIG00001819	PLF_1573_00001958	PGF_00066252		238	pyrH	Uridine monophosphate kinase (EC 2.7.4.22)
Clavibacter michiganensis strain PF008	28447.7	CP012573	fig|28447.7.peg.1320	AES38_06545		PATRIC.28447.7.CP012573.CDS.1376336.1376893.fwd	PATRIC	CDS	1376336	1376893	558	+	FIG00000202	PLF_1573_00001774	PGF_00048926		185		Ribosome recycling factor
Clavibacter michiganensis strain PF008	28447.7	CP012573	fig|28447.7.peg.1321	AES38_06550		PATRIC.28447.7.CP012573.CDS.1376894.1377934.fwd	PATRIC	CDS	1376894	1377934	1041	+	FIG00000097	PLF_1573_00001649	PGF_00033291		346		Phosphatidate cytidylyltransferase (EC 2.7.7.41)
Clavibacter michiganensis strain PF008	28447.7	CP012573	fig|28447.7.peg.1322	AES38_06555		PATRIC.28447.7.CP012573.CDS.1377945.1378490.fwd	PATRIC	CDS	1377945	1378490	546	+	FIG00511886	PLF_1573_00002097	PGF_01251412		181		FIG00511887: hypothetical protein
Clavibacter michiganensis strain PF008	28447.7	CP012573	fig|28447.7.peg.1323	AES38_06560		PATRIC.28447.7.CP012573.CDS.1378595.1379302.fwd	PATRIC	CDS	1378595	1379302	708	+	FIG01029321	PLF_1573_00000729	PGF_00050124		235		Secreted protein
Clavibacter michiganensis strain PF008	28447.7	CP012573	fig|28447.7.peg.1324	AES38_06565		PATRIC.28447.7.CP012573.CDS.1379376.1381106.fwd	PATRIC	CDS	1379376	1381106	1731	+	FIG00008246	PLF_1573_00000558	PGF_00025269		576		Na+/H+ antiporter
Clavibacter michiganensis strain PF008	28447.7	CP012573	fig|28447.7.peg.1325	AES38_06570		PATRIC.28447.7.CP012573.CDS.1381141.1381437.fwd	PATRIC	CDS	1381141	1381437	297	+	FIG00884023	PLF_1573_00000184	PGF_00020650		98		ATP/GTP-binding protein
Clavibacter michiganensis strain PF008	28447.7	CP012573	fig|28447.7.peg.1326	AES38_06575		PATRIC.28447.7.CP012573.CDS.1381434.1382168.fwd	PATRIC	CDS	1381434	1382168	735	+	FIG01107022	PLF_1573_00000940	PGF_00150784		244		FIG01173569: hypothetical protein
Clavibacter michiganensis strain PF008	28447.7	CP012573	fig|28447.7.peg.1327	AES38_06580		PATRIC.28447.7.CP012573.CDS.1382211.1383269.rev	PATRIC	CDS	1382211	1383269	1059	-	FIG00933666	PLF_1573_00000307	PGF_00019621		352		Membrane protein
Clavibacter michiganensis strain PF008	28447.7	CP012573	fig|28447.7.peg.1328	AES38_06585		PATRIC.28447.7.CP012573.CDS.1383295.1385070.rev	PATRIC	CDS	1383295	1385070	1776	-	FIG00815714	PLF_1573_00000274	PGF_00016653		591		Large Ala/Glu-rich protein
Clavibacter michiganensis strain PF008	28447.7	CP012573	fig|28447.7.peg.1329	AES38_06590		PATRIC.28447.7.CP012573.CDS.1385356.1387218.fwd	PATRIC	CDS	1385356	1387218	1863	+	FIG00638284	PLF_1573_00000939	PGF_01253390		620		hypothetical protein
Clavibacter michiganensis strain PF008	28447.7	CP012573	fig|28447.7.peg.1330			PATRIC.28447.7.CP012573.CDS.1387418.1388230.fwd	PATRIC	CDS	1387418	1388230	813	+		PLF_1573_00000509	PGF_00425686		270		FIG000875: Thioredoxin domain-containing protein EC-YbbN
Clavibacter michiganensis strain PF008	28447.7	CP012573	fig|28447.7.peg.1331	AES38_06600		PATRIC.28447.7.CP012573.CDS.1388301.1390883.rev	PATRIC	CDS	1388301	1390883	2583	-	FIG00024930	PLF_1573_00000372	PGF_00420994		860		1,4-alpha-glucan (glycogen) branching enzyme, GH-13-type (EC 2.4.1.18)
Clavibacter michiganensis strain PF008	28447.7	CP012573	fig|28447.7.peg.1332	AES38_06605		PATRIC.28447.7.CP012573.CDS.1390889.1393285.rev	PATRIC	CDS	1390889	1393285	2397	-	FIG00004763	PLF_1573_00001703	PGF_00040882		798		Putative glucanase glgE (EC 3.2.1.-)
Clavibacter michiganensis strain PF008	28447.7	CP012573	fig|28447.7.peg.1333	AES38_06610		PATRIC.28447.7.CP012573.CDS.1393532.1396087.fwd	PATRIC	CDS	1393532	1396087	2556	+	FIG00000476	PLF_1573_00000222	PGF_00008872		851		Glycogen phosphorylase (EC 2.4.1.1)
Clavibacter michiganensis strain PF008	28447.7	CP012573	fig|28447.7.peg.1334	AES38_06615		PATRIC.28447.7.CP012573.CDS.1396136.1397449.rev	PATRIC	CDS	1396136	1397449	1314	-	FIG00512607	PLF_1573_00000938	PGF_01253389		437		FIG00512609: hypothetical protein
Clavibacter michiganensis strain PF008	28447.7	CP012573	fig|28447.7.peg.1335	AES38_06620		PATRIC.28447.7.CP012573.CDS.1397598.1399634.rev	PATRIC	CDS	1397598	1399634	2037	-	FIG00109688	PLF_1573_00001364	PGF_00008870		678		Glycogen debranching enzyme (EC 3.2.1.-)
Clavibacter michiganensis strain PF008	28447.7	CP012573	fig|28447.7.peg.1336	AES38_06625		PATRIC.28447.7.CP012573.CDS.1399675.1400880.fwd	PATRIC	CDS	1399675	1400880	1206	+	FIG00000001	PLF_1573_00001394	PGF_00420043		401		Cysteine desulfurase (EC 2.8.1.7)
Clavibacter michiganensis strain PF008	28447.7	CP012573	fig|28447.7.peg.1337	AES38_06630		PATRIC.28447.7.CP012573.CDS.1400877.1402046.fwd	PATRIC	CDS	1400877	1402046	1170	+	FIG00000626	PLF_1573_00002725	PGF_00413347		389		tRNA-specific 2-thiouridylase MnmA
Clavibacter michiganensis strain PF008	28447.7	CP012573	fig|28447.7.peg.1338	AES38_06635		PATRIC.28447.7.CP012573.CDS.1402043.1404523.fwd	PATRIC	CDS	1402043	1404523	2481	+	FIG00051439	PLF_1573_00001530	PGF_00421366		826		DNA ligase (NAD(+)) (EC 6.5.1.2)
Clavibacter michiganensis strain PF008	28447.7	CP012573	fig|28447.7.peg.1339			PATRIC.28447.7.CP012573.CDS.1404615.1405901.rev	PATRIC	CDS	1404615	1405901	1287	-	FIG00638284	PLF_1573_00002684	PGF_01251600		428		hypothetical protein
Clavibacter michiganensis strain PF008	28447.7	CP012573	fig|28447.7.peg.1340	AES38_06640		PATRIC.28447.7.CP012573.CDS.1405893.1406006.fwd	PATRIC	CDS	1405893	1406006	114	+	FIG00512185	PLF_1573_00001266	PGF_01251291		37		Uncharacterized protein Rv2079/MT2140
Clavibacter michiganensis strain PF008	28447.7	CP012573	fig|28447.7.peg.1341			PATRIC.28447.7.CP012573.CDS.1406047.1406382.rev	PATRIC	CDS	1406047	1406382	336	-	FIG00905474	PLF_1573_00001994	PGF_01251354		111		putative secreted protein
Clavibacter michiganensis strain PF008	28447.7	CP012573	fig|28447.7.peg.1342	AES38_06650		PATRIC.28447.7.CP012573.CDS.1406549.1406917.fwd	PATRIC	CDS	1406549	1406917	369	+	FIG00000432	PLF_1573_00000228	PGF_00067581		122		Aspartyl-tRNA(Asn) amidotransferase subunit C (EC 6.3.5.6) @ Glutamyl-tRNA(Gln) amidotransferase subunit C (EC 6.3.5.7)
Clavibacter michiganensis strain PF008	28447.7	CP012573	fig|28447.7.peg.1343	AES38_06655		PATRIC.28447.7.CP012573.CDS.1406925.1408472.fwd	PATRIC	CDS	1406925	1408472	1548	+	FIG00000359	PLF_1573_00001476	PGF_00067524		515		Aspartyl-tRNA(Asn) amidotransferase subunit A (EC 6.3.5.6) @ Glutamyl-tRNA(Gln) amidotransferase subunit A (EC 6.3.5.7)
Clavibacter michiganensis strain PF008	28447.7	CP012573	fig|28447.7.peg.1344	AES38_06660		PATRIC.28447.7.CP012573.CDS.1408472.1409974.fwd	PATRIC	CDS	1408472	1409974	1503	+	FIG00000399	PLF_1573_00000481	PGF_00067554		500		Aspartyl-tRNA(Asn) amidotransferase subunit B (EC 6.3.5.6) @ Glutamyl-tRNA(Gln) amidotransferase subunit B (EC 6.3.5.7)
Clavibacter michiganensis strain PF008	28447.7	CP012573	fig|28447.7.peg.1345	AES38_06665		PATRIC.28447.7.CP012573.CDS.1409971.1411608.fwd	PATRIC	CDS	1409971	1411608	1638	+	FIG01956052	PLF_1573_00000170	PGF_00012167		545		ABC-type transporter, duplicated ATPase component
Clavibacter michiganensis strain PF008	28447.7	CP012573	fig|28447.7.peg.1346	AES38_06670		PATRIC.28447.7.CP012573.CDS.1411636.1413282.rev	PATRIC	CDS	1411636	1413282	1647	-	FIG00511827	PLF_1573_00001035	PGF_00408062		548		putative lipoprotein
Clavibacter michiganensis strain PF008	28447.7	CP012573	fig|28447.7.peg.1347	AES38_06675		PATRIC.28447.7.CP012573.CDS.1413467.1414168.fwd	PATRIC	CDS	1413467	1414168	702	+	FIG00638284	PLF_1573_00003057	PGF_00251055		233		hypothetical protein
Clavibacter michiganensis strain PF008	28447.7	CP012573	fig|28447.7.peg.1348	AES38_06680		PATRIC.28447.7.CP012573.CDS.1414292.1414951.fwd	PATRIC	CDS	1414292	1414951	660	+	FIG00512190	PLF_1573_00002639	PGF_00251055		219		FIG00512192: hypothetical protein
Clavibacter michiganensis strain PF008	28447.7	CP012573	fig|28447.7.peg.1349	AES38_06685		PATRIC.28447.7.CP012573.CDS.1414963.1416651.rev	PATRIC	CDS	1414963	1416651	1689	-	FIG00018699	PLF_1573_00001272	PGF_00017565		562		Long-chain-fatty-acid--CoA ligase (EC 6.2.1.3)
Clavibacter michiganensis strain PF008	28447.7	CP012573	fig|28447.7.peg.1350	AES38_06690		PATRIC.28447.7.CP012573.CDS.1416719.1417165.rev	PATRIC	CDS	1416719	1417165	447	-	FIG00638284	PLF_1573_00000937	PGF_00392645		148		hypothetical protein
Clavibacter michiganensis strain PF008	28447.7	CP012573	fig|28447.7.peg.1351	AES38_06695		PATRIC.28447.7.CP012573.CDS.1417239.1418687.rev	PATRIC	CDS	1417239	1418687	1449	-	FIG00139162	PLF_1573_00001668	PGF_00034218		482		Phytoene dehydrogenase and related proteins
Clavibacter michiganensis strain PF008	28447.7	CP012573	fig|28447.7.peg.1352	AES38_06700		PATRIC.28447.7.CP012573.CDS.1418697.1419695.rev	PATRIC	CDS	1418697	1419695	999	-	FIG00546160	PLF_1573_00001229	PGF_00422870		332		Dehydrogenases with different specificities (related to short-chain alcohol dehydrogenases)
Clavibacter michiganensis strain PF008	28447.7	CP012573	fig|28447.7.peg.1353	AES38_06705		PATRIC.28447.7.CP012573.CDS.1419794.1421482.rev	PATRIC	CDS	1419794	1421482	1689	-	FIG00018699	PLF_1573_00002346	PGF_00017565		562		Long-chain-fatty-acid--CoA ligase (EC 6.2.1.3)
Clavibacter michiganensis strain PF008	28447.7	CP012573	fig|28447.7.peg.1354	AES38_06710		PATRIC.28447.7.CP012573.CDS.1421547.1422476.rev	PATRIC	CDS	1421547	1422476	930	-	FIG01319309	PLF_1573_00000102	PGF_00404475		309		probable oxidoreductase/Short-chain dehydrogenase
Clavibacter michiganensis strain PF008	28447.7	CP012573	fig|28447.7.peg.1355			PATRIC.28447.7.CP012573.CDS.1422506.1422643.rev	PATRIC	CDS	1422506	1422643	138	-					45		hypothetical protein
Clavibacter michiganensis strain PF008	28447.7	CP012573	fig|28447.7.peg.1356	AES38_06715		PATRIC.28447.7.CP012573.CDS.1422662.1422940.fwd	PATRIC	CDS	1422662	1422940	279	+	FIG00638284	PLF_1573_00002620	PGF_00254003		92		hypothetical protein
Clavibacter michiganensis strain PF008	28447.7	CP012573	fig|28447.7.peg.1357	AES38_06720		PATRIC.28447.7.CP012573.CDS.1422937.1424130.fwd	PATRIC	CDS	1422937	1424130	1194	+	FIG00020897	PLF_1573_00001097	PGF_00026946		397		Acetylornithine deacetylase (EC 3.5.1.16)
Clavibacter michiganensis strain PF008	28447.7	CP012573	fig|28447.7.peg.1358	AES38_06725		PATRIC.28447.7.CP012573.CDS.1424134.1424649.rev	PATRIC	CDS	1424134	1424649	516	-	FIG01238380	PLF_1573_00000612	PGF_00033439		171		Phosphoesterase
Clavibacter michiganensis strain PF008	28447.7	CP012573	fig|28447.7.peg.1359	AES38_06730		PATRIC.28447.7.CP012573.CDS.1424683.1425216.fwd	PATRIC	CDS	1424683	1425216	534	+	FIG00512327	PLF_1573_00002398	PGF_00027953		177		Acetyltransferase, GNAT family
Clavibacter michiganensis strain PF008	28447.7	CP012573	fig|28447.7.peg.1360	AES38_06735		PATRIC.28447.7.CP012573.CDS.1425274.1425888.fwd	PATRIC	CDS	1425274	1425888	615	+	FIG01169552	PLF_1573_00000759	PGF_00055042		204		Sulfite oxidase and related enzymes
Clavibacter michiganensis strain PF008	28447.7	CP012573	fig|28447.7.peg.1361	AES38_06740		PATRIC.28447.7.CP012573.CDS.1425885.1426631.fwd	PATRIC	CDS	1425885	1426631	747	+	FIG01954108	PLF_1573_00000315	PGF_00005929		248		Flavodoxin reductases (ferredoxin-NADPH reductases) family 1
Clavibacter michiganensis strain PF008	28447.7	CP012573	fig|28447.7.peg.1362	AES38_06745		PATRIC.28447.7.CP012573.CDS.1426708.1427238.fwd	PATRIC	CDS	1426708	1427238	531	+	FIG00511684	PLF_1573_00000936	PGF_00356385		176		FIG00511686: hypothetical protein
Clavibacter michiganensis strain PF008	28447.7	CP012573	fig|28447.7.peg.1363			PATRIC.28447.7.CP012573.CDS.1427368.1428354.fwd	PATRIC	CDS	1427368	1428354	987	+	FIG00511319	PLF_1573_00002096	PGF_00221861		328		FIG00511321: hypothetical protein
Clavibacter michiganensis strain PF008	28447.7	CP012573	fig|28447.7.peg.1364	AES38_06755		PATRIC.28447.7.CP012573.CDS.1428425.1429717.fwd	PATRIC	CDS	1428425	1429717	1293	+	FIG00023943	PLF_1573_00000403	PGF_00421611		430		DNA polymerase IV (EC 2.7.7.7)
Clavibacter michiganensis strain PF008	28447.7	CP012573	fig|28447.7.peg.1365	AES38_06760		PATRIC.28447.7.CP012573.CDS.1429729.1430184.fwd	PATRIC	CDS	1429729	1430184	456	+	FIG00000670	PLF_1573_00001047	PGF_00409628		151		putative membrane protein
Clavibacter michiganensis strain PF008	28447.7	CP012573	fig|28447.7.peg.1366	AES38_06765		PATRIC.28447.7.CP012573.CDS.1430255.1431568.rev	PATRIC	CDS	1430255	1431568	1314	-	FIG00000532	PLF_1573_00001944	PGF_00064092		437		UDP-glucose 6-dehydrogenase (EC 1.1.1.22)
Clavibacter michiganensis strain PF008	28447.7	CP012573	fig|28447.7.peg.1367	AES38_06770		PATRIC.28447.7.CP012573.CDS.1431743.1433545.rev	PATRIC	CDS	1431743	1433545	1803	-	FIG00001338	PLF_1573_00002350	PGF_00019051		600		Malto-oligosyltrehalose trehalohydrolase (EC 3.2.1.141)
Clavibacter michiganensis strain PF008	28447.7	CP012573	fig|28447.7.peg.1368	AES38_06775		PATRIC.28447.7.CP012573.CDS.1433548.1435893.rev	PATRIC	CDS	1433548	1435893	2346	-	FIG00001606	PLF_1573_00001281	PGF_00019050		781		Malto-oligosyltrehalose synthase (EC 5.4.99.15)
Clavibacter michiganensis strain PF008	28447.7	CP012573	fig|28447.7.peg.1369	AES38_06780		PATRIC.28447.7.CP012573.CDS.1435890.1438094.rev	PATRIC	CDS	1435890	1438094	2205	-	FIG00109688	PLF_1573_00001215	PGF_00008870		734		Glycogen debranching enzyme (EC 3.2.1.-)
Clavibacter michiganensis strain PF008	28447.7	CP012573	fig|28447.7.peg.1370	AES38_06785		PATRIC.28447.7.CP012573.CDS.1438298.1438630.fwd	PATRIC	CDS	1438298	1438630	333	+	FIG00511739	PLF_1573_00002752	PGF_00299846		110		FIG00511740: hypothetical protein
Clavibacter michiganensis strain PF008	28447.7	CP012573	fig|28447.7.peg.1371	AES38_06790		PATRIC.28447.7.CP012573.CDS.1438879.1439532.fwd	PATRIC	CDS	1438879	1439532	654	+	FIG00010078	PLF_1573_00000751	PGF_00054427		217		Substrate-specific component YkoE of thiamin-regulated ECF transporter for HydroxyMethylPyrimidine
Clavibacter michiganensis strain PF008	28447.7	CP012573	fig|28447.7.peg.1372	AES38_06795		PATRIC.28447.7.CP012573.CDS.1439535.1441082.fwd	PATRIC	CDS	1439535	1441082	1548	+	FIG00009894	PLF_1573_00000188	PGF_00423916		515		Duplicated ATPase component YkoD of energizing module of thiamin-regulated ECF transporter for HydroxyMethylPyrimidine
Clavibacter michiganensis strain PF008	28447.7	CP012573	fig|28447.7.peg.1373	AES38_06800		PATRIC.28447.7.CP012573.CDS.1441079.1441873.fwd	PATRIC	CDS	1441079	1441873	795	+	FIG00032753	PLF_1573_00001907	PGF_00060537		264		Transmembrane component YkoC of energizing module of thiamin-regulated ECF transporter for HydroxyMethylPyrimidine
Clavibacter michiganensis strain PF008	28447.7	CP012573	fig|28447.7.peg.1374	AES38_06805		PATRIC.28447.7.CP012573.CDS.1441863.1442408.fwd	PATRIC	CDS	1441863	1442408	546	+	FIG00546935	PLF_1573_00002095	PGF_00210472		181		FIG00546937: hypothetical protein
Clavibacter michiganensis strain PF008	28447.7	CP012573	fig|28447.7.peg.1375	AES38_06810		PATRIC.28447.7.CP012573.CDS.1442418.1442690.fwd	PATRIC	CDS	1442418	1442690	273	+	FIG00511532	PLF_1573_00002175	PGF_01251459		90		FIG00511533: hypothetical protein
Clavibacter michiganensis strain PF008	28447.7	CP012573	fig|28447.7.peg.1376	AES38_06815		PATRIC.28447.7.CP012573.CDS.1442821.1443171.rev	PATRIC	CDS	1442821	1443171	351	-	FIG00638284	PLF_1573_00000935	PGF_00133053		116		hypothetical protein
Clavibacter michiganensis strain PF008	28447.7	CP012573	fig|28447.7.peg.1377	AES38_06825		PATRIC.28447.7.CP012573.CDS.1443441.1444061.rev	PATRIC	CDS	1443441	1444061	621	-	FIG00001097	PLF_1573_00001104	PGF_00416576		206		3'-to-5' oligoribonuclease (orn)
Clavibacter michiganensis strain PF008	28447.7	CP012573	fig|28447.7.peg.1378	AES38_06830		PATRIC.28447.7.CP012573.CDS.1444118.1444333.fwd	PATRIC	CDS	1444118	1444333	216	+	FIG00761799	PLF_1573_00002709	PGF_00407666		71		putative integral membrane protein
Clavibacter michiganensis strain PF008	28447.7	CP012573	fig|28447.7.peg.1379	AES38_06835		PATRIC.28447.7.CP012573.CDS.1444387.1444683.fwd	PATRIC	CDS	1444387	1444683	297	+	FIG01318274	PLF_1573_00001846	PGF_00056742		98		Thioredoxin
Clavibacter michiganensis strain PF008	28447.7	CP012573	fig|28447.7.peg.1380	AES38_06845		PATRIC.28447.7.CP012573.CDS.1444811.1445632.fwd	PATRIC	CDS	1444811	1445632	822	+	FIG00000590	PLF_1573_00000547	PGF_00024308		273		NAD synthetase (EC 6.3.1.5)
Clavibacter michiganensis strain PF008	28447.7	CP012573	fig|28447.7.peg.1381	AES38_06850		PATRIC.28447.7.CP012573.CDS.1445704.1446411.rev	PATRIC	CDS	1445704	1446411	708	-	FIG00512605	PLF_1573_00001989	PGF_01251353		235		FIG00512606: hypothetical protein
Clavibacter michiganensis strain PF008	28447.7	CP012573	fig|28447.7.peg.1382	AES38_06855		PATRIC.28447.7.CP012573.CDS.1446496.1446732.rev	PATRIC	CDS	1446496	1446732	237	-	FIG00512509	PLF_1573_00002094	PGF_01251411		78		FIG00512510: hypothetical protein
Clavibacter michiganensis strain PF008	28447.7	CP012573	fig|28447.7.peg.1383	AES38_06860		PATRIC.28447.7.CP012573.CDS.1446903.1447430.fwd	PATRIC	CDS	1446903	1447430	528	+	FIG00002199	PLF_1573_00001634	PGF_00030661		175		Peptide methionine sulfoxide reductase MsrA (EC 1.8.4.11)
Clavibacter michiganensis strain PF008	28447.7	CP012573	fig|28447.7.peg.1384	AES38_06865		PATRIC.28447.7.CP012573.CDS.1447531.1447761.fwd	PATRIC	CDS	1447531	1447761	231	+	FIG00511285	PLF_1573_00000934	PGF_01253388		76		FIG00511286: hypothetical protein
Clavibacter michiganensis strain PF008	28447.7	CP012573	fig|28447.7.peg.1385	AES38_06870		PATRIC.28447.7.CP012573.CDS.1447893.1448297.fwd	PATRIC	CDS	1447893	1448297	405	+	FIG00638284	PLF_1573_00002621	PGF_01251559		134		hypothetical protein
Clavibacter michiganensis strain PF008	28447.7	CP012573	fig|28447.7.peg.1386			PATRIC.28447.7.CP012573.CDS.1448294.1448686.fwd	PATRIC	CDS	1448294	1448686	393	+	FIG00554610	PLF_1573_00001892	PGF_00059570		130		Transcriptional regulator, MarR family
Clavibacter michiganensis strain PF008	28447.7	CP012573	fig|28447.7.peg.1387			PATRIC.28447.7.CP012573.CDS.1448671.1448850.fwd	PATRIC	CDS	1448671	1448850	180	+					59		Transcriptional regulator, MarR family
Clavibacter michiganensis strain PF008	28447.7	CP012573	fig|28447.7.peg.1388	AES38_06880		PATRIC.28447.7.CP012573.CDS.1448847.1449320.fwd	PATRIC	CDS	1448847	1449320	474	+	FIG00638284	PLF_1573_00000933	PGF_01253387		157		hypothetical protein
Clavibacter michiganensis strain PF008	28447.7	CP012573	fig|28447.7.peg.1389	AES38_06885		PATRIC.28447.7.CP012573.CDS.1449385.1451067.fwd	PATRIC	CDS	1449385	1451067	1683	+	FIG01956052	PLF_1573_00000161	PGF_00003367		560		ABC transporter, ATP-binding protein
Clavibacter michiganensis strain PF008	28447.7	CP012573	fig|28447.7.peg.1390	AES38_06890		PATRIC.28447.7.CP012573.CDS.1451072.1451551.fwd	PATRIC	CDS	1451072	1451551	480	+	FIG00511282	PLF_1573_00000089	PGF_00251055		159		FIG00511283: hypothetical protein
Clavibacter michiganensis strain PF008	28447.7	CP012573	fig|28447.7.peg.1391	AES38_06895		PATRIC.28447.7.CP012573.CDS.1451558.1452463.rev	PATRIC	CDS	1451558	1452463	906	-	FIG00002217	PLF_1573_00000129	PGF_00033468		301		Acyl-CoA thioesterase II (EC 3.1.2.-)
Clavibacter michiganensis strain PF008	28447.7	CP012573	fig|28447.7.peg.1392	AES38_06900		PATRIC.28447.7.CP012573.CDS.1452546.1453241.fwd	PATRIC	CDS	1452546	1453241	696	+	FIG00511997	PLF_1573_00000932	PGF_01253386		231		FIG00733533: hypothetical protein
Clavibacter michiganensis strain PF008	28447.7	CP012573	fig|28447.7.peg.1393	AES38_06905		PATRIC.28447.7.CP012573.CDS.1453297.1453692.rev	PATRIC	CDS	1453297	1453692	396	-	FIG00001245	PLF_1573_00000241	PGF_00011445		131		Hemoglobin-like protein HbO
Clavibacter michiganensis strain PF008	28447.7	CP012573	fig|28447.7.peg.1394	AES38_06910		PATRIC.28447.7.CP012573.CDS.1453692.1454999.rev	PATRIC	CDS	1453692	1454999	1308	-	FIG00021330	PLF_1573_00000630	PGF_00035371		435		Potassium efflux system KefA protein / Small-conductance mechanosensitive channel
Clavibacter michiganensis strain PF008	28447.7	CP012573	fig|28447.7.peg.1395	AES38_06915		PATRIC.28447.7.CP012573.CDS.1455181.1457724.rev	PATRIC	CDS	1455181	1457724	2544	-	FIG00000714	PLF_1573_00000301	PGF_00019485		847		Membrane alanine aminopeptidase N (EC 3.4.11.2)
Clavibacter michiganensis strain PF008	28447.7	CP012573	fig|28447.7.peg.1396	AES38_06920		PATRIC.28447.7.CP012573.CDS.1457878.1458504.fwd	PATRIC	CDS	1457878	1458504	627	+	FIG00511784	PLF_1573_00002093	PGF_00251055		208		FIG00511786: hypothetical protein
Clavibacter michiganensis strain PF008	28447.7	CP012573	fig|28447.7.peg.1397	AES38_06925		PATRIC.28447.7.CP012573.CDS.1458619.1459107.fwd	PATRIC	CDS	1458619	1459107	489	+	FIG00135914	PLF_1573_00001768	PGF_00048655		162		Ribose 5-phosphate isomerase B (EC 5.3.1.6) / Galactose 6-phosphate isomerase
Clavibacter michiganensis strain PF008	28447.7	CP012573	fig|28447.7.peg.1398	AES38_06930		PATRIC.28447.7.CP012573.CDS.1459114.1460103.fwd	PATRIC	CDS	1459114	1460103	990	+	FIG00035634	PLF_1573_00000317	PGF_00006124		329		Formamidopyrimidine-DNA glycosylase (EC 3.2.2.23)
Clavibacter michiganensis strain PF008	28447.7	CP012573	fig|28447.7.peg.1399	AES38_06935		PATRIC.28447.7.CP012573.CDS.1460184.1460669.rev	PATRIC	CDS	1460184	1460669	486	-	FIG00109595	PLF_1573_00001599	PGF_00026253		161		Non-specific DNA-binding protein Dps / Iron-binding ferritin-like antioxidant protein / Ferroxidase (EC 1.16.3.1)
Clavibacter michiganensis strain PF008	28447.7	CP012573	fig|28447.7.peg.1400			PATRIC.28447.7.CP012573.CDS.1460814.1462976.rev	PATRIC	CDS	1460814	1462976	2163	-		PLF_1573_00001033	PGF_00407641		720		putative integral membrane protein
Clavibacter michiganensis strain PF008	28447.7	CP012573	fig|28447.7.peg.1401			PATRIC.28447.7.CP012573.CDS.1462949.1466314.rev	PATRIC	CDS	1462949	1466314	3366	-	FIG00638284	PLF_1573_00001033	PGF_00407641		1121		putative integral membrane protein
Clavibacter michiganensis strain PF008	28447.7	CP012573	fig|28447.7.peg.1402	AES38_06955		PATRIC.28447.7.CP012573.CDS.1466881.1468326.fwd	PATRIC	CDS	1466881	1468326	1446	+	FIG00000286	PLF_1573_00001363	PGF_00417144		481		Cell division trigger factor (EC 5.2.1.8)
Clavibacter michiganensis strain PF008	28447.7	CP012573	fig|28447.7.peg.1403	AES38_06960		PATRIC.28447.7.CP012573.CDS.1468527.1469114.fwd	PATRIC	CDS	1468527	1469114	588	+	FIG00000028	PLF_1573_00001391	PGF_00016413		195		ATP-dependent Clp protease proteolytic subunit (EC 3.4.21.92)
Clavibacter michiganensis strain PF008	28447.7	CP012573	fig|28447.7.peg.1404	AES38_06965		PATRIC.28447.7.CP012573.CDS.1469151.1469831.fwd	PATRIC	CDS	1469151	1469831	681	+	FIG00000028	PLF_1573_00001176	PGF_00016413		226	clpP	ATP-dependent Clp protease proteolytic subunit (EC 3.4.21.92)
Clavibacter michiganensis strain PF008	28447.7	CP012573	fig|28447.7.peg.1405	AES38_06970		PATRIC.28447.7.CP012573.CDS.1469897.1471039.rev	PATRIC	CDS	1469897	1471039	1143	-	FIG00002438	PLF_1573_00000491	PGF_00418457		380		Coenzyme F420-dependent N5,N10-methylene tetrahydromethanopterin reductase and related flavin-dependent oxidoreductases; sulfonate monooxygenase
Clavibacter michiganensis strain PF008	28447.7	CP012573	fig|28447.7.peg.1406	AES38_06975		PATRIC.28447.7.CP012573.CDS.1471192.1472472.fwd	PATRIC	CDS	1471192	1472472	1281	+	FIG00000241	PLF_1573_00001174	PGF_00016338		426		ATP-dependent Clp protease ATP-binding subunit ClpX
Clavibacter michiganensis strain PF008	28447.7	CP012573	fig|28447.7.peg.1407	AES38_06980		PATRIC.28447.7.CP012573.CDS.1472555.1474618.rev	PATRIC	CDS	1472555	1474618	2064	-	FIG00004220	PLF_1573_00001177	PGF_00423604		687		Dipeptidyl carboxypeptidase Dcp (EC 3.4.15.5)
Clavibacter michiganensis strain PF008	28447.7	CP012573	fig|28447.7.peg.1408	AES38_06985		PATRIC.28447.7.CP012573.CDS.1474658.1475461.fwd	PATRIC	CDS	1474658	1475461	804	+	FIG00511251	PLF_1573_00002069	PGF_01251399		267		putative methylase( EC:2.1.1.- )
Clavibacter michiganensis strain PF008	28447.7	CP012573	fig|28447.7.peg.1409	AES38_06990		PATRIC.28447.7.CP012573.CDS.1475537.1475800.rev	PATRIC	CDS	1475537	1475800	264	-	FIG00511640	PLF_1573_00000931	PGF_00352740		87		FIG00511642: hypothetical protein
Clavibacter michiganensis strain PF008	28447.7	CP012573	fig|28447.7.peg.1410	AES38_06995		PATRIC.28447.7.CP012573.CDS.1475800.1476252.rev	PATRIC	CDS	1475800	1476252	453	-	FIG00001650	PLF_1573_00000411	PGF_01252415		150		Histone acetyltransferase HPA2 and related acetyltransferases
Clavibacter michiganensis strain PF008	28447.7	CP012573	fig|28447.7.peg.1411	AES38_07000		PATRIC.28447.7.CP012573.CDS.1476249.1478894.rev	PATRIC	CDS	1476249	1478894	2646	-	FIG00000129	PLF_1573_00002547	PGF_00066453		881	valS	Valyl-tRNA synthetase (EC 6.1.1.9)
Clavibacter michiganensis strain PF008	28447.7	CP012573	fig|28447.7.peg.1412	AES38_07005		PATRIC.28447.7.CP012573.CDS.1479030.1480970.rev	PATRIC	CDS	1479030	1480970	1941	-	FIG00001643	PLF_1573_00002451	PGF_00033390		646		Phosphoenolpyruvate carboxykinase [GTP] (EC 4.1.1.32)
Clavibacter michiganensis strain PF008	28447.7	CP012573	fig|28447.7.peg.1413	AES38_07010		PATRIC.28447.7.CP012573.CDS.1481082.1482509.fwd	PATRIC	CDS	1481082	1482509	1428	+	FIG01229586	PLF_1573_00000793	PGF_00059868		475		Transcriptional regulator, Xre family
Clavibacter michiganensis strain PF008	28447.7	CP012573	fig|28447.7.peg.1414	AES38_07015		PATRIC.28447.7.CP012573.CDS.1482527.1484212.rev	PATRIC	CDS	1482527	1484212	1686	-	FIG00945384	PLF_1573_00000571	PGF_00027017		561		Oligopeptide transport system permease protein OppB (TC 3.A.1.5.1)
Clavibacter michiganensis strain PF008	28447.7	CP012573	fig|28447.7.peg.1415	AES38_07020		PATRIC.28447.7.CP012573.CDS.1484209.1485069.rev	PATRIC	CDS	1484209	1485069	861	-	FIG00455853	PLF_1573_00000575	PGF_00027047		286		Oligopeptide transport system permease protein OppC (TC 3.A.1.5.1)
Clavibacter michiganensis strain PF008	28447.7	CP012573	fig|28447.7.peg.1416	AES38_07025		PATRIC.28447.7.CP012573.CDS.1485066.1486103.rev	PATRIC	CDS	1485066	1486103	1038	-	FIG00945384	PLF_1573_00000569	PGF_00027022		345		Oligopeptide transport system permease protein OppB (TC 3.A.1.5.1)
Clavibacter michiganensis strain PF008	28447.7	CP012573	fig|28447.7.peg.1417	AES38_07030		PATRIC.28447.7.CP012573.CDS.1486100.1487746.rev	PATRIC	CDS	1486100	1487746	1647	-	FIG00451095	PLF_1573_00002439	PGF_00026929		548		Oligopeptide ABC transporter, periplasmic oligopeptide-binding protein OppA (TC 3.A.1.5.1)
Clavibacter michiganensis strain PF008	28447.7	CP012573	fig|28447.7.peg.1418	AES38_07035		PATRIC.28447.7.CP012573.CDS.1487851.1488459.fwd	PATRIC	CDS	1487851	1488459	609	+	FIG00554417	PLF_1573_00001865	PGF_00058904		202		Transcriptional regulator, AcrR family
Clavibacter michiganensis strain PF008	28447.7	CP012573	fig|28447.7.peg.1419			PATRIC.28447.7.CP012573.CDS.1488586.1489347.fwd	PATRIC	CDS	1488586	1489347	762	+	FIG01451910	PLF_1573_00002601	PGF_01251547		253		cellulase( EC:3.2.1.4 )
Clavibacter michiganensis strain PF008	28447.7	CP012573	fig|28447.7.peg.1420	AES38_07045		PATRIC.28447.7.CP012573.CDS.1489420.1490178.fwd	PATRIC	CDS	1489420	1490178	759	+	FIG00515945	PLF_1573_00001554	PGF_00021092		252		Methyltransferase
Clavibacter michiganensis strain PF008	28447.7	CP012573	fig|28447.7.peg.1421	AES38_07050		PATRIC.28447.7.CP012573.CDS.1490422.1493742.fwd	PATRIC	CDS	1490422	1493742	3321	+	FIG00000085	PLF_1573_00002338	PGF_00015718		1106	ileS	Isoleucyl-tRNA synthetase (EC 6.1.1.5)
Clavibacter michiganensis strain PF008	28447.7	CP012573	fig|28447.7.peg.1422	AES38_07055		PATRIC.28447.7.CP012573.CDS.1493739.1495316.fwd	PATRIC	CDS	1493739	1495316	1578	+	FIG00000106	PLF_1573_00002294	PGF_00423300		525		Dihydrofolate synthase (EC 6.3.2.12) @ Folylpolyglutamate synthase (EC 6.3.2.17)
Clavibacter michiganensis strain PF008	28447.7	CP012573	fig|28447.7.peg.1423	AES38_07060		PATRIC.28447.7.CP012573.CDS.1495313.1495804.fwd	PATRIC	CDS	1495313	1495804	492	+		PLF_1573_00000990	PGF_01253422		163		membrane protein
Clavibacter michiganensis strain PF008	28447.7	CP012573	fig|28447.7.peg.1424	AES38_07065		PATRIC.28447.7.CP012573.CDS.1495814.1496233.fwd	PATRIC	CDS	1495814	1496233	420	+	FIG00000251	PLF_1573_00000560	PGF_00026394		139		Nucleoside diphosphate kinase (EC 2.7.4.6)
Clavibacter michiganensis strain PF008	28447.7	CP012573	fig|28447.7.peg.1425	AES38_07070		PATRIC.28447.7.CP012573.CDS.1496295.1496903.rev	PATRIC	CDS	1496295	1496903	609	-	FIG01956050	PLF_1573_00000431	PGF_00014601		202		Integral membrane protein
Clavibacter michiganensis strain PF008	28447.7	CP012573	fig|28447.7.peg.1426			PATRIC.28447.7.CP012573.CDS.1498201.1500249.fwd	PATRIC	CDS	1498201	1500249	2049	+	FIG00059426	PLF_1573_00000392	PGF_00420608		682		Cytoplasmic axial filament protein CafA and Ribonuclease G (EC 3.1.4.-)
Clavibacter michiganensis strain PF008	28447.7	CP012573	fig|28447.7.peg.1427	AES38_07080		PATRIC.28447.7.CP012573.CDS.1500349.1500627.rev	PATRIC	CDS	1500349	1500627	279	-	FIG01728217	PLF_1573_00003574	PGF_00340910		92		Streptomyces venezuelae ISP5230 chloramphenicol resistance protein (cmlv) and chloramphenicol phosphotransferase genes, complete cds
Clavibacter michiganensis strain PF008	28447.7	CP012573	fig|28447.7.peg.1428	AES38_07085		PATRIC.28447.7.CP012573.CDS.1500908.1501216.fwd	PATRIC	CDS	1500908	1501216	309	+	FIG00000276	PLF_1573_00001079	PGF_00016365		102		LSU ribosomal protein L21p
Clavibacter michiganensis strain PF008	28447.7	CP012573	fig|28447.7.peg.1429	AES38_07090		PATRIC.28447.7.CP012573.CDS.1501241.1501495.fwd	PATRIC	CDS	1501241	1501495	255	+	FIG00000189	PLF_1573_00001252	PGF_00016385		84		LSU ribosomal protein L27p
Clavibacter michiganensis strain PF008	28447.7	CP012573	fig|28447.7.peg.1430	AES38_07095		PATRIC.28447.7.CP012573.CDS.1501620.1503158.fwd	PATRIC	CDS	1501620	1503158	1539	+		PLF_1573_00001316	PGF_00007039		512	yhbZ	GTP-binding protein Obg
Clavibacter michiganensis strain PF008	28447.7	CP012573	fig|28447.7.peg.1431	AES38_07100		PATRIC.28447.7.CP012573.CDS.1503162.1503941.fwd	PATRIC	CDS	1503162	1503941	780	+	FIG00000351	PLF_1573_00001325	PGF_00008059		259		Glutamate 5-kinase (EC 2.7.2.11)
Clavibacter michiganensis strain PF008	28447.7	CP012573	fig|28447.7.peg.1432	AES38_07105		PATRIC.28447.7.CP012573.CDS.1504008.1505360.fwd	PATRIC	CDS	1504008	1505360	1353	+	FIG00000365	PLF_1573_00001319	PGF_00007170		450		Gamma-glutamyl phosphate reductase (EC 1.2.1.41)
Clavibacter michiganensis strain PF008	28447.7	CP012573	fig|28447.7.peg.1433	AES38_07110		PATRIC.28447.7.CP012573.CDS.1505498.1505713.fwd	PATRIC	CDS	1505498	1505713	216	+	FIG00511632	PLF_1573_00002174	PGF_00131590		71		FIG00511633: hypothetical protein
Clavibacter michiganensis strain PF008	28447.7	CP012573	fig|28447.7.peg.1434	AES38_07115		PATRIC.28447.7.CP012573.CDS.1505731.1506333.fwd	PATRIC	CDS	1505731	1506333	603	+	FIG01956071	PLF_1573_00001595	PGF_00025603		200		Nicotinate-nucleotide adenylyltransferase (EC 2.7.7.18)
Clavibacter michiganensis strain PF008	28447.7	CP012573	fig|28447.7.peg.1435	AES38_07120		PATRIC.28447.7.CP012573.CDS.1506330.1507928.fwd	PATRIC	CDS	1506330	1507928	1599	+	FIG01595019	PLF_1573_00001696	PGF_01251317		532		Proteophosphoglycan 5
Clavibacter michiganensis strain PF008	28447.7	CP012573	fig|28447.7.peg.1436	AES38_07125		PATRIC.28447.7.CP012573.CDS.1507968.1508345.fwd	PATRIC	CDS	1507968	1508345	378	+	FIG00135315	PLF_1573_00001772	PGF_00048866		125		Ribosomal silencing factor RsfA
Clavibacter michiganensis strain PF008	28447.7	CP012573	fig|28447.7.peg.1437	AES38_07135		PATRIC.28447.7.CP012573.CDS.1509126.1509890.fwd	PATRIC	CDS	1509126	1509890	765	+	FIG00638284				254		hypothetical protein
Clavibacter michiganensis strain PF008	28447.7	CP012573	fig|28447.7.peg.1438	AES38_07140		PATRIC.28447.7.CP012573.CDS.1509916.1510239.fwd	PATRIC	CDS	1509916	1510239	324	+		PLF_1573_00001074	PGF_01251273		107		hypothetical protein
Clavibacter michiganensis strain PF008	28447.7	CP012573	fig|28447.7.peg.1439	AES38_07145		PATRIC.28447.7.CP012573.CDS.1510272.1511294.fwd	PATRIC	CDS	1510272	1511294	1023	+	FIG00638284	PLF_1573_00000930	PGF_01253385		340		hypothetical protein
Clavibacter michiganensis strain PF008	28447.7	CP012573	fig|28447.7.peg.1440	AES38_07150		PATRIC.28447.7.CP012573.CDS.1511539.1512327.fwd	PATRIC	CDS	1511539	1512327	789	+	FIG00001452	PLF_1573_00001900	PGF_00060282		262		Transcriptional repressor of the fructose operon, DeoR family
Clavibacter michiganensis strain PF008	28447.7	CP012573	fig|28447.7.peg.1441	AES38_07155		PATRIC.28447.7.CP012573.CDS.1512324.1513295.fwd	PATRIC	CDS	1512324	1513295	972	+	FIG00001366	PLF_1573_00000373	PGF_00426495		323		1-phosphofructokinase (EC 2.7.1.56)
Clavibacter michiganensis strain PF008	28447.7	CP012573	fig|28447.7.peg.1442	AES38_07160		PATRIC.28447.7.CP012573.CDS.1513318.1515369.fwd	PATRIC	CDS	1513318	1515369	2052	+	FIG00001234	PLF_1573_00000589	PGF_00029639		683		PTS system, fructose-specific IIA component (EC 2.7.1.69) / PTS system, fructose-specific IIB component (EC 2.7.1.69) / PTS system, fructose-specific IIC component (EC 2.7.1.69)
Clavibacter michiganensis strain PF008	28447.7	CP012573	fig|28447.7.peg.1443	AES38_07165		PATRIC.28447.7.CP012573.CDS.1515412.1515684.fwd	PATRIC	CDS	1515412	1515684	273	+	FIG01954533	PLF_1573_00000623	PGF_00034062		90		Phosphotransferase system, phosphocarrier protein HPr
Clavibacter michiganensis strain PF008	28447.7	CP012573	fig|28447.7.peg.1444	AES38_07170		PATRIC.28447.7.CP012573.CDS.1515759.1517270.rev	PATRIC	CDS	1515759	1517270	1512	-	FIG00945653	PLF_1573_00002899	PGF_00042745		503		Putative oxidoreductase
Clavibacter michiganensis strain PF008	28447.7	CP012573	fig|28447.7.peg.1445	AES38_07175		PATRIC.28447.7.CP012573.CDS.1517331.1517603.rev	PATRIC	CDS	1517331	1517603	273	-		PLF_1573_00002263	PGF_00211799		90		hypothetical protein
Clavibacter michiganensis strain PF008	28447.7	CP012573	fig|28447.7.peg.1446	AES38_07180		PATRIC.28447.7.CP012573.CDS.1517731.1520271.fwd	PATRIC	CDS	1517731	1520271	2541	+	FIG00946155	PLF_1573_00000671	PGF_00041217		846		Putative helicase
Clavibacter michiganensis strain PF008	28447.7	CP012573	fig|28447.7.peg.1447	AES38_07185		PATRIC.28447.7.CP012573.CDS.1520268.1521197.fwd	PATRIC	CDS	1520268	1521197	930	+	FIG00511468	PLF_1573_00001019	PGF_00404475		309		probable oxidoreductase/Short-chain dehydrogenase
Clavibacter michiganensis strain PF008	28447.7	CP012573	fig|28447.7.peg.1448	AES38_07190		PATRIC.28447.7.CP012573.CDS.1521218.1522336.rev	PATRIC	CDS	1521218	1522336	1119	-	FIG00000474	PLF_1573_00000410	PGF_00011999		372		Histidinol-phosphate aminotransferase (EC 2.6.1.9)
Clavibacter michiganensis strain PF008	28447.7	CP012573	fig|28447.7.peg.1449	AES38_07195		PATRIC.28447.7.CP012573.CDS.1522422.1523348.fwd	PATRIC	CDS	1522422	1523348	927	+	FIG00511717	PLF_1573_00001128	PGF_01251280		308		Dihydrolipoamide acetyltransferase-related protein
Clavibacter michiganensis strain PF008	28447.7	CP012573	fig|28447.7.peg.1450	AES38_07200		PATRIC.28447.7.CP012573.CDS.1523386.1524120.fwd	PATRIC	CDS	1523386	1524120	735	+	FIG00627714	PLF_1573_00001971	PGF_00068324		244		alpha/beta hydrolase fold
Clavibacter michiganensis strain PF008	28447.7	CP012573	fig|28447.7.peg.1451	AES38_07205		PATRIC.28447.7.CP012573.CDS.1524209.1525618.fwd	PATRIC	CDS	1524209	1525618	1410	+	FIG00511829	PLF_1573_00002091	PGF_00379770		469		FIG00511830: hypothetical protein
Clavibacter michiganensis strain PF008	28447.7	CP012573	fig|28447.7.peg.1452	AES38_07210		PATRIC.28447.7.CP012573.CDS.1525615.1526592.rev	PATRIC	CDS	1525615	1526592	978	-	FIG00002982	PLF_1573_00001746	PGF_00046129		325		Quinone oxidoreductase (EC 1.6.5.5)
Clavibacter michiganensis strain PF008	28447.7	CP012573	fig|28447.7.peg.1453	AES38_07215		PATRIC.28447.7.CP012573.CDS.1526746.1527312.fwd	PATRIC	CDS	1526746	1527312	567	+	FIG00948541	PLF_1573_00002472	PGF_00038715		188		Protein yceI precursor
Clavibacter michiganensis strain PF008	28447.7	CP012573	fig|28447.7.peg.1454	AES38_07220		PATRIC.28447.7.CP012573.CDS.1527413.1528345.rev	PATRIC	CDS	1527413	1528345	933	-	FIG00042074	PLF_1573_00000211	PGF_01251421		310		Beta-ketoadipate enol-lactone hydrolase (EC 3.1.1.24)
Clavibacter michiganensis strain PF008	28447.7	CP012573	fig|28447.7.peg.1455	AES38_07225		PATRIC.28447.7.CP012573.CDS.1528342.1529394.rev	PATRIC	CDS	1528342	1529394	1053	-	FIG01227784	PLF_1573_00001460	PGF_00014473		350		Integral membrane protein
Clavibacter michiganensis strain PF008	28447.7	CP012573	fig|28447.7.peg.1456	AES38_07230		PATRIC.28447.7.CP012573.CDS.1529447.1532872.rev	PATRIC	CDS	1529447	1532872	3426	-	FIG00041038	PLF_1573_00000105	PGF_00424713		1141		Error-prone repair homolog of DNA polymerase III alpha subunit (EC 2.7.7.7)
Clavibacter michiganensis strain PF008	28447.7	CP012573	fig|28447.7.peg.1457	AES38_07235		PATRIC.28447.7.CP012573.CDS.1532985.1534352.fwd	PATRIC	CDS	1532985	1534352	1368	+	FIG00000332	PLF_1573_00002706	PGF_00407143		455		putative glucose-6-phosphate 1-dehydrogenase
Clavibacter michiganensis strain PF008	28447.7	CP012573	fig|28447.7.peg.1458	AES38_07240		PATRIC.28447.7.CP012573.CDS.1534447.1535190.fwd	PATRIC	CDS	1534447	1535190	744	+	FIG01069253	PLF_1573_00001534	PGF_00423134		247		Dienelactone hydrolase family protein
Clavibacter michiganensis strain PF008	28447.7	CP012573	fig|28447.7.peg.1459	AES38_07245		PATRIC.28447.7.CP012573.CDS.1535298.1536578.fwd	PATRIC	CDS	1535298	1536578	1281	+	FIG00025213	PLF_1573_00000014	PGF_00417149		426		Cell envelope-associated transcriptional attenuator LytR-CpsA-Psr, subfamily A1 (as in PMID19099556)
Clavibacter michiganensis strain PF008	28447.7	CP012573	fig|28447.7.peg.1460	AES38_07250		PATRIC.28447.7.CP012573.CDS.1536615.1537313.rev	PATRIC	CDS	1536615	1537313	699	-	FIG00126067	PLF_1573_00000713	PGF_00048482		232		Riboflavin transporter PnuX
Clavibacter michiganensis strain PF008	28447.7	CP012573	fig|28447.7.peg.1461	AES38_07255		PATRIC.28447.7.CP012573.CDS.1537416.1537739.rev	PATRIC	CDS	1537416	1537739	324	-		PLF_1573_00002173	PGF_01251458		107		hypothetical protein
Clavibacter michiganensis strain PF008	28447.7	CP012573	fig|28447.7.peg.1462	AES38_07260		PATRIC.28447.7.CP012573.CDS.1537991.1538860.fwd	PATRIC	CDS	1537991	1538860	870	+		PLF_1573_00001722	PGF_00042802		289		Putative oxidoreductase
Clavibacter michiganensis strain PF008	28447.7	CP012573	fig|28447.7.peg.1463	AES38_07265		PATRIC.28447.7.CP012573.CDS.1538931.1540070.rev	PATRIC	CDS	1538931	1540070	1140	-	FIG00514618	PLF_1573_00000077	PGF_00099526		379		FIG01028644: hypothetical protein
Clavibacter michiganensis strain PF008	28447.7	CP012573	fig|28447.7.peg.1464	AES38_07270		PATRIC.28447.7.CP012573.CDS.1540067.1540849.rev	PATRIC	CDS	1540067	1540849	783	-	FIG00511245	PLF_1573_00002640	PGF_01251569		260		FIG00511247: hypothetical protein
Clavibacter michiganensis strain PF008	28447.7	CP012573	fig|28447.7.peg.1465	AES38_07275		PATRIC.28447.7.CP012573.CDS.1540991.1541896.fwd	PATRIC	CDS	1540991	1541896	906	+	FIG00008556	PLF_1573_00001146	PGF_00008706		301		Glycine betaine/L-proline transport ATP-binding protein ProV (TC 3.A.1.12.1)
Clavibacter michiganensis strain PF008	28447.7	CP012573	fig|28447.7.peg.1466	AES38_07280		PATRIC.28447.7.CP012573.CDS.1541893.1542591.fwd	PATRIC	CDS	1541893	1542591	699	+	FIG00005559	PLF_1573_00001138	PGF_00008727		232		Glycine betaine/L-proline transport system permease protein ProW (TC 3.A.1.12.1)
Clavibacter michiganensis strain PF008	28447.7	CP012573	fig|28447.7.peg.1467	AES38_07285		PATRIC.28447.7.CP012573.CDS.1542588.1543313.fwd	PATRIC	CDS	1542588	1543313	726	+	FIG01954415	PLF_1573_00000117	PGF_00008668		241		Glycine betaine ABC transport system permease protein
Clavibacter michiganensis strain PF008	28447.7	CP012573	fig|28447.7.peg.1468	AES38_07290		PATRIC.28447.7.CP012573.CDS.1543328.1544254.fwd	PATRIC	CDS	1543328	1544254	927	+	FIG00002823	PLF_1573_00001245	PGF_00016187		308		L-proline glycine betaine binding ABC transporter protein proX (TC 3.A.1.12.1)
Clavibacter michiganensis strain PF008	28447.7	CP012573	fig|28447.7.peg.1469			PATRIC.28447.7.CP012573.CDS.1544395.1544844.fwd	PATRIC	CDS	1544395	1544844	450	+	FIG00512013	PLF_1573_00000991	PGF_01253423		149		FIG00512016: hypothetical protein
Clavibacter michiganensis strain PF008	28447.7	CP012573	fig|28447.7.peg.1470	AES38_07300		PATRIC.28447.7.CP012573.CDS.1544874.1546061.fwd	PATRIC	CDS	1544874	1546061	1188	+	FIG00443156	PLF_1573_00001368	PGF_00417411		395		Chalcone synthase (EC 2.3.1.74)
Clavibacter michiganensis strain PF008	28447.7	CP012573	fig|28447.7.peg.1471	AES38_07305		PATRIC.28447.7.CP012573.CDS.1546061.1546774.fwd	PATRIC	CDS	1546061	1546774	714	+	FIG00666322	PLF_1573_00000724	PGF_00049568		237		SAM-dependent methyltransferases
Clavibacter michiganensis strain PF008	28447.7	CP012573	fig|28447.7.peg.1472	AES38_07310		PATRIC.28447.7.CP012573.CDS.1546771.1547961.fwd	PATRIC	CDS	1546771	1547961	1191	+	FIG00453279	PLF_1573_00000455	PGF_00413175		396		2-polyprenyl-6-methoxyphenol hydroxylase and related FAD-dependent oxidoreductases
Clavibacter michiganensis strain PF008	28447.7	CP012573	fig|28447.7.peg.1473	AES38_07315		PATRIC.28447.7.CP012573.CDS.1547954.1548799.rev	PATRIC	CDS	1547954	1548799	846	-	FIG00000499	PLF_1573_00000747	PGF_00052503		281		Similar to 1,4-dihydroxy-2-naphthoate octaprenyltransferase
Clavibacter michiganensis strain PF008	28447.7	CP012573	fig|28447.7.peg.1474	AES38_07320		PATRIC.28447.7.CP012573.CDS.1548796.1549266.rev	PATRIC	CDS	1548796	1549266	471	-	FIG00001650	PLF_1573_00001425	PGF_00012093		156		Histone acetyltransferase HPA2 and related acetyltransferases
Clavibacter michiganensis strain PF008	28447.7	CP012573	fig|28447.7.peg.1475	AES38_07325		PATRIC.28447.7.CP012573.CDS.1549324.1549860.fwd	PATRIC	CDS	1549324	1549860	537	+	FIG01272034	PLF_1573_00002477	PGF_00039875		178		Putative acetyltransferase
Clavibacter michiganensis strain PF008	28447.7	CP012573	fig|28447.7.peg.1476	AES38_07330		PATRIC.28447.7.CP012573.CDS.1550144.1550593.rev	PATRIC	CDS	1550144	1550593	450	-	FIG00512057	PLF_1573_00000031	PGF_01251770		149		FIG00512058: hypothetical protein
Clavibacter michiganensis strain PF008	28447.7	CP012573	fig|28447.7.peg.1477	AES38_07335		PATRIC.28447.7.CP012573.CDS.1550977.1552389.fwd	PATRIC	CDS	1550977	1552389	1413	+	FIG00096593	PLF_1573_00001403	PGF_00420572		470		Cytochrome d ubiquinol oxidase subunit I (EC 1.10.3.-)
Clavibacter michiganensis strain PF008	28447.7	CP012573	fig|28447.7.peg.1478	AES38_07340		PATRIC.28447.7.CP012573.CDS.1552391.1553395.fwd	PATRIC	CDS	1552391	1553395	1005	+	FIG00000390	PLF_1573_00000390	PGF_00420576		334		Cytochrome d ubiquinol oxidase subunit II (EC 1.10.3.-)
Clavibacter michiganensis strain PF008	28447.7	CP012573	fig|28447.7.peg.1479	AES38_07345		PATRIC.28447.7.CP012573.CDS.1553403.1555166.fwd	PATRIC	CDS	1553403	1555166	1764	+	FIG01010650	PLF_1573_00000801	PGF_00060646		587		Transport ATP-binding protein CydD
Clavibacter michiganensis strain PF008	28447.7	CP012573	fig|28447.7.peg.1480	AES38_07350		PATRIC.28447.7.CP012573.CDS.1555163.1556836.fwd	PATRIC	CDS	1555163	1556836	1674	+	FIG00046358	PLF_1573_00000800	PGF_00060628		557		Transport ATP-binding protein CydC
Clavibacter michiganensis strain PF008	28447.7	CP012573	fig|28447.7.peg.1481	AES38_07355		PATRIC.28447.7.CP012573.CDS.1556875.1557696.rev	PATRIC	CDS	1556875	1557696	822	-	FIG00000708	PLF_1573_00000477	PGF_00053002		273		Aminodeoxychorismate lyase (EC 4.1.3.38)
Clavibacter michiganensis strain PF008	28447.7	CP012573	fig|28447.7.peg.1482			PATRIC.28447.7.CP012573.CDS.1557750.1559315.fwd	PATRIC	CDS	1557750	1559315	1566	+	FIG00341164	PLF_1573_00000593	PGF_00030007		521		Para-aminobenzoate synthase, aminase component (EC 2.6.1.85)
Clavibacter michiganensis strain PF008	28447.7	CP012573	fig|28447.7.peg.1483	AES38_07365		PATRIC.28447.7.CP012573.CDS.1559341.1561899.fwd	PATRIC	CDS	1559341	1561899	2559	+	FIG00000114	PLF_1573_00000280	PGF_00016918		852		Leucyl-tRNA synthetase (EC 6.1.1.4)
Clavibacter michiganensis strain PF008	28447.7	CP012573	fig|28447.7.peg.1484	AES38_07370		PATRIC.28447.7.CP012573.CDS.1562045.1563163.fwd	PATRIC	CDS	1562045	1563163	1119	+	FIG00996743	PLF_1573_00001698	PGF_00039317		372		Putative DNA-binding protein
Clavibacter michiganensis strain PF008	28447.7	CP012573	fig|28447.7.peg.1485			PATRIC.28447.7.CP012573.CDS.1563294.1564115.fwd	PATRIC	CDS	1563294	1564115	822	+	FIG00638284				273		hypothetical protein
Clavibacter michiganensis strain PF008	28447.7	CP012573	fig|28447.7.peg.1486	AES38_07380		PATRIC.28447.7.CP012573.CDS.1565073.1566101.fwd	PATRIC	CDS	1565073	1566101	1029	+	FIG00106663	PLF_1573_00000402	PGF_00421534		342		DNA polymerase III delta subunit (EC 2.7.7.7)
Clavibacter michiganensis strain PF008	28447.7	CP012573	fig|28447.7.peg.1487	AES38_07385		PATRIC.28447.7.CP012573.CDS.1566195.1566458.rev	PATRIC	CDS	1566195	1566458	264	-	FIG00000213	PLF_1573_00001790	PGF_00049864		87		SSU ribosomal protein S20p
Clavibacter michiganensis strain PF008	28447.7	CP012573	fig|28447.7.peg.1488	AES38_07390		PATRIC.28447.7.CP012573.CDS.1566594.1567112.rev	PATRIC	CDS	1566594	1567112	519	-	FIG01323436	PLF_1573_00001561	PGF_00023450		172		MutT/Nudix family protein
Clavibacter michiganensis strain PF008	28447.7	CP012573	fig|28447.7.peg.1489	AES38_07395		PATRIC.28447.7.CP012573.CDS.1567167.1568429.fwd	PATRIC	CDS	1567167	1568429	1263	+	FIG00076542	PLF_1573_00001547	PGF_01251310		420		Metallo-dependent hydrolases, subgroup C
Clavibacter michiganensis strain PF008	28447.7	CP012573	fig|28447.7.peg.1490	AES38_07400		PATRIC.28447.7.CP012573.CDS.1568426.1569403.fwd	PATRIC	CDS	1568426	1569403	978	+	FIG00002048	PLF_1573_00000354	PGF_00416874		325		Cell division inhibitor
Clavibacter michiganensis strain PF008	28447.7	CP012573	fig|28447.7.peg.1491	AES38_07405		PATRIC.28447.7.CP012573.CDS.1569467.1571350.fwd	PATRIC	CDS	1569467	1571350	1884	+	FIG00000165	PLF_1573_00000797	PGF_00060414		627		Translation elongation factor LepA
Clavibacter michiganensis strain PF008	28447.7	CP012573	fig|28447.7.peg.1492	AES38_07410		PATRIC.28447.7.CP012573.CDS.1571423.1572244.rev	PATRIC	CDS	1571423	1572244	822	-	FIG00638284	PLF_1573_00003229	PGF_01251860		273		hypothetical protein
Clavibacter michiganensis strain PF008	28447.7	CP012573	fig|28447.7.peg.1493	AES38_07415		PATRIC.28447.7.CP012573.CDS.1572340.1573119.rev	PATRIC	CDS	1572340	1573119	780	-		PLF_1573_00002997	PGF_01251698		259		putative secreted protein
Clavibacter michiganensis strain PF008	28447.7	CP012573	fig|28447.7.peg.1494	AES38_07420		PATRIC.28447.7.CP012573.CDS.1573188.1574054.rev	PATRIC	CDS	1573188	1574054	867	-					288		putative secreted protein
Clavibacter michiganensis strain PF008	28447.7	CP012573	fig|28447.7.peg.1495	AES38_07425		PATRIC.28447.7.CP012573.CDS.1574376.1575029.fwd	PATRIC	CDS	1574376	1575029	654	+	FIG00512280	PLF_1573_00001152	PGF_00000451		217		A3(2) GLYCOGEN METABOLISM CLUSTERI
Clavibacter michiganensis strain PF008	28447.7	CP012573	fig|28447.7.peg.1496	AES38_07430		PATRIC.28447.7.CP012573.CDS.1575046.1575747.rev	PATRIC	CDS	1575046	1575747	702	-	FIG00937416	PLF_1573_00001433	PGF_00012823		233		Hydrolase, haloacid dehalogenase-like family
Clavibacter michiganensis strain PF008	28447.7	CP012573	fig|28447.7.peg.1497	AES38_07435		PATRIC.28447.7.CP012573.CDS.1575837.1577060.fwd	PATRIC	CDS	1575837	1577060	1224	+	FIG01303216	PLF_1573_00001438	PGF_00013416		407		Hypothetical radical SAM family enzyme in heat shock gene cluster, similarity with CPO of BS HemN-type
Clavibacter michiganensis strain PF008	28447.7	CP012573	fig|28447.7.peg.1498	AES38_07440		PATRIC.28447.7.CP012573.CDS.1577076.1577489.rev	PATRIC	CDS	1577076	1577489	414	-	FIG00511463	PLF_1573_00000072	PGF_00251055		137		FIG00511464: hypothetical protein
Clavibacter michiganensis strain PF008	28447.7	CP012573	fig|28447.7.peg.1499	AES38_07445		PATRIC.28447.7.CP012573.CDS.1577500.1577895.rev	PATRIC	CDS	1577500	1577895	396	-	FIG00511373	PLF_1573_00000030	PGF_01251701		131		FIG00511375: hypothetical protein
Clavibacter michiganensis strain PF008	28447.7	CP012573	fig|28447.7.peg.1500	AES38_07450		PATRIC.28447.7.CP012573.CDS.1578080.1579102.fwd	PATRIC	CDS	1578080	1579102	1023	+	FIG00000544	PLF_1573_00002332	PGF_00011014		340		Heat-inducible transcription repressor HrcA
Clavibacter michiganensis strain PF008	28447.7	CP012573	fig|28447.7.peg.1501	AES38_07455		PATRIC.28447.7.CP012573.CDS.1579163.1580275.fwd	PATRIC	CDS	1579163	1580275	1113	+	FIG00000070	PLF_1573_00002375	PGF_00417428		370		Chaperone protein DnaJ
Clavibacter michiganensis strain PF008	28447.7	CP012573	fig|28447.7.peg.1502	AES38_07460		PATRIC.28447.7.CP012573.CDS.1580279.1581031.fwd	PATRIC	CDS	1580279	1581031	753	+	FIG00000248	PLF_1573_00000111	PGF_00010205		250		16S rRNA (uracil(1498)-N(3))-methyltransferase (EC 2.1.1.193)
Clavibacter michiganensis strain PF008	28447.7	CP012573	fig|28447.7.peg.1503	AES38_07465		PATRIC.28447.7.CP012573.CDS.1581060.1581416.fwd	PATRIC	CDS	1581060	1581416	357	+	FIG00008590	PLF_1573_00001087	PGF_00423068		118		Diadenosine tetraphosphate (Ap4A) hydrolase and other HIT family hydrolases
Clavibacter michiganensis strain PF008	28447.7	CP012573	fig|28447.7.peg.1504	AES38_07470		PATRIC.28447.7.CP012573.CDS.1581403.1582458.fwd	PATRIC	CDS	1581403	1582458	1056	+	FIG00045341	PLF_1573_00001645	PGF_00033237		351		Phosphate starvation-inducible protein PhoH, predicted ATPase
Clavibacter michiganensis strain PF008	28447.7	CP012573	fig|28447.7.peg.1505	AES38_07475		PATRIC.28447.7.CP012573.CDS.1582455.1582916.fwd	PATRIC	CDS	1582455	1582916	462	+		PLF_1573_00001546	PGF_00020361		153		Metal-dependent hydrolase YbeY, involved in rRNA and/or ribosome maturation and assembly
Clavibacter michiganensis strain PF008	28447.7	CP012573	fig|28447.7.peg.1506	AES38_07480		PATRIC.28447.7.CP012573.CDS.1582927.1584249.fwd	PATRIC	CDS	1582927	1584249	1323	+	FIG00042627	PLF_1573_00001277	PGF_00018560		440		Magnesium and cobalt efflux protein CorC
Clavibacter michiganensis strain PF008	28447.7	CP012573	fig|28447.7.peg.1507	AES38_07485		PATRIC.28447.7.CP012573.CDS.1584356.1585297.fwd	PATRIC	CDS	1584356	1585297	942	+	FIG01304818	PLF_1573_00001314	PGF_00007027		313		GTP-binding protein Era
Clavibacter michiganensis strain PF008	28447.7	CP012573	fig|28447.7.peg.1508	AES38_07490		PATRIC.28447.7.CP012573.CDS.1585407.1586918.fwd	PATRIC	CDS	1585407	1586918	1512	+	FIG00511518	PLF_1573_00002251	PGF_01251479		503		two-component sensor
Clavibacter michiganensis strain PF008	28447.7	CP012573	fig|28447.7.peg.1509	AES38_07495		PATRIC.28447.7.CP012573.CDS.1586972.1587658.fwd	PATRIC	CDS	1586972	1587658	687	+	FIG01402845	PLF_1573_00001934	PGF_00063054		228		Two-component system, regulatory protein
Clavibacter michiganensis strain PF008	28447.7	CP012573	fig|28447.7.peg.1510	AES38_07500		PATRIC.28447.7.CP012573.CDS.1587742.1589157.fwd	PATRIC	CDS	1587742	1589157	1416	+	FIG00638284	PLF_1573_00003538	PGF_01252030		471		FIG00824695: hypothetical protein
Clavibacter michiganensis strain PF008	28447.7	CP012573	fig|28447.7.peg.1511	AES38_07505		PATRIC.28447.7.CP012573.CDS.1589154.1591709.fwd	PATRIC	CDS	1589154	1591709	2556	+	FIG01056920	PLF_1573_00000395	PGF_00001333		851		FIG00996524: hypothetical protein
Clavibacter michiganensis strain PF008	28447.7	CP012573	fig|28447.7.peg.1512	AES38_07510		PATRIC.28447.7.CP012573.CDS.1591844.1593610.fwd	PATRIC	CDS	1591844	1593610	1767	+	FIG00000157	PLF_1573_00001493	PGF_00069984		588		2-isopropylmalate synthase (EC 2.3.3.13)
Clavibacter michiganensis strain PF008	28447.7	CP012573	fig|28447.7.peg.1513	AES38_07515		PATRIC.28447.7.CP012573.CDS.1593689.1594366.rev	PATRIC	CDS	1593689	1594366	678	-	FIG00672847	PLF_1573_00002223	PGF_00408801		225		putative membrane protein
Clavibacter michiganensis strain PF008	28447.7	CP012573	fig|28447.7.peg.1514	AES38_07520		PATRIC.28447.7.CP012573.CDS.1594452.1595369.fwd	PATRIC	CDS	1594452	1595369	918	+	FIG00000315	PLF_1573_00001419	PGF_00421737		305		DNA recombination and repair protein RecO
Clavibacter michiganensis strain PF008	28447.7	CP012573	fig|28447.7.peg.1515	AES38_07525		PATRIC.28447.7.CP012573.CDS.1595366.1596232.fwd	PATRIC	CDS	1595366	1596232	867	+	FIG00000110	PLF_1573_00001854	PGF_00057381		288		Trans,polycis-decaprenyl diphosphate synthase (EC 2.5.1.86)
Clavibacter michiganensis strain PF008	28447.7	CP012573	fig|28447.7.peg.1516	AES38_07530		PATRIC.28447.7.CP012573.CDS.1596242.1597351.fwd	PATRIC	CDS	1596242	1597351	1110	+	FIG00638284	PLF_1573_00001721	PGF_00042754		369		Putative oxidoreductase
Clavibacter michiganensis strain PF008	28447.7	CP012573	fig|28447.7.peg.1517	AES38_07535		PATRIC.28447.7.CP012573.CDS.1597463.1598848.fwd	PATRIC	CDS	1597463	1598848	1386	+	FIG00001189	PLF_1573_00001213	PGF_00009966		461		Glycyl-tRNA synthetase (EC 6.1.1.14)
Clavibacter michiganensis strain PF008	28447.7	CP012573	fig|28447.7.peg.1518	AES38_07540		PATRIC.28447.7.CP012573.CDS.1598900.1599433.rev	PATRIC	CDS	1598900	1599433	534	-	FIG01340511	PLF_1573_00001965	PGF_00067213		177		YbaK/prolyl-tRNA synthetase associated region
Clavibacter michiganensis strain PF008	28447.7	CP012573	fig|28447.7.peg.1519	AES38_07545		PATRIC.28447.7.CP012573.CDS.1599485.1600207.fwd	PATRIC	CDS	1599485	1600207	723	+	FIG00007195	PLF_1573_00002820	PGF_00006342		240		FrnE protein
Clavibacter michiganensis strain PF008	28447.7	CP012573	fig|28447.7.peg.1520	AES38_07550		PATRIC.28447.7.CP012573.CDS.1600204.1600419.fwd	PATRIC	CDS	1600204	1600419	216	+		PLF_1573_00003009	PGF_01251705		71		hypothetical protein
Clavibacter michiganensis strain PF008	28447.7	CP012573	fig|28447.7.peg.1521	AES38_07555		PATRIC.28447.7.CP012573.CDS.1600512.1601738.fwd	PATRIC	CDS	1600512	1601738	1227	+	FIG00000580	PLF_1573_00002245	PGF_00413267		408		tRNA dihydrouridine synthase B (EC 1.-.-.-)
Clavibacter michiganensis strain PF008	28447.7	CP012573	fig|28447.7.peg.1522	AES38_07560		PATRIC.28447.7.CP012573.CDS.1601728.1603002.fwd	PATRIC	CDS	1601728	1603002	1275	+	FIG00023004	PLF_1573_00001974	PGF_00070431		424		dNTP triphosphohydrolase, broad substrate specificity
Clavibacter michiganensis strain PF008	28447.7	CP012573	fig|28447.7.peg.1523	AES38_07565		PATRIC.28447.7.CP012573.CDS.1603064.1604968.fwd	PATRIC	CDS	1603064	1604968	1905	+	FIG00019251	PLF_1573_00000404	PGF_00421667		634		DNA primase (EC 2.7.7.-)
Clavibacter michiganensis strain PF008	28447.7	CP012573	fig|28447.7.peg.1524	AES38_07570		PATRIC.28447.7.CP012573.CDS.1605136.1606788.fwd	PATRIC	CDS	1605136	1606788	1653	+	FIG01480169	PLF_1573_00001685	PGF_00037357		550		Probable solute-binding protein of ABC transporter for peptides
Clavibacter michiganensis strain PF008	28447.7	CP012573	fig|28447.7.peg.1525	AES38_07575		PATRIC.28447.7.CP012573.CDS.1606882.1608021.fwd	PATRIC	CDS	1606882	1608021	1140	+	FIG00945384	PLF_1573_00001607	PGF_00027022		379		Oligopeptide transport system permease protein OppB (TC 3.A.1.5.1)
Clavibacter michiganensis strain PF008	28447.7	CP012573	fig|28447.7.peg.1526	AES38_07580		PATRIC.28447.7.CP012573.CDS.1608023.1609003.fwd	PATRIC	CDS	1608023	1609003	981	+	FIG00455853	PLF_1573_00000573	PGF_00027043		326		Oligopeptide transport system permease protein OppC (TC 3.A.1.5.1)
Clavibacter michiganensis strain PF008	28447.7	CP012573	fig|28447.7.peg.1527	AES38_07585		PATRIC.28447.7.CP012573.CDS.1609000.1610712.fwd	PATRIC	CDS	1609000	1610712	1713	+	FIG00014907	PLF_1573_00000169	PGF_00423514		570		Dipeptide transport ATP-binding protein DppD (TC 3.A.1.5.2)
Clavibacter michiganensis strain PF008	28447.7	CP012573	fig|28447.7.peg.1528	AES38_07590		PATRIC.28447.7.CP012573.CDS.1610823.1611797.fwd	PATRIC	CDS	1610823	1611797	975	+	FIG00014907	PLF_1573_00001164	PGF_00423508		324		Dipeptide transport ATP-binding protein DppD (TC 3.A.1.5.2)
Clavibacter michiganensis strain PF008	28447.7	CP012573	fig|28447.7.peg.1529	AES38_07595		PATRIC.28447.7.CP012573.CDS.1611794.1612813.fwd	PATRIC	CDS	1611794	1612813	1020	+	FIG00031250	PLF_1573_00001654	PGF_00033501		339		Phosphoglycerate dehydrogenase and related dehydrogenases
Clavibacter michiganensis strain PF008	28447.7	CP012573	fig|28447.7.peg.1530	AES38_07600		PATRIC.28447.7.CP012573.CDS.1612865.1613893.fwd	PATRIC	CDS	1612865	1613893	1029	+	FIG00512540	PLF_1573_00002088	PGF_00127467		342		FIG00512542: hypothetical protein
Clavibacter michiganensis strain PF008	28447.7	CP012573	fig|28447.7.peg.1531	AES38_07605		PATRIC.28447.7.CP012573.CDS.1613912.1614289.rev	PATRIC	CDS	1613912	1614289	378	-	FIG00512025	PLF_1573_00000929	PGF_01253383		125		FIG00512026: hypothetical protein
Clavibacter michiganensis strain PF008	28447.7	CP012573	fig|28447.7.peg.1532			PATRIC.28447.7.CP012573.CDS.1614366.1614557.rev	PATRIC	CDS	1614366	1614557	192	-	FIG00638284		PGF_03573156		63		hypothetical protein
Clavibacter michiganensis strain PF008	28447.7	CP012573	fig|28447.7.peg.1533	AES38_07615		PATRIC.28447.7.CP012573.CDS.1614681.1615544.fwd	PATRIC	CDS	1614681	1615544	864	+	FIG00664847	PLF_1573_00002993	PGF_01251695		287		TOMM biosynthesis cyclodehydratase (protein C)
Clavibacter michiganensis strain PF008	28447.7	CP012573	fig|28447.7.peg.1534			PATRIC.28447.7.CP012573.CDS.1615541.1617190.fwd	PATRIC	CDS	1615541	1617190	1650	+	FIG00638284	PLF_1573_00003010	PGF_01251706		549		hypothetical protein
Clavibacter michiganensis strain PF008	28447.7	CP012573	fig|28447.7.peg.1535			PATRIC.28447.7.CP012573.CDS.1617612.1618562.fwd	PATRIC	CDS	1617612	1618562	951	+		PLF_1573_00002609	PGF_00251055		316		FIG01131232: hypothetical protein
Clavibacter michiganensis strain PF008	28447.7	CP012573	fig|28447.7.peg.1536	AES38_07630		PATRIC.28447.7.CP012573.CDS.1618571.1619887.fwd	PATRIC	CDS	1618571	1619887	1317	+		PLF_1573_00003011	PGF_00251055		438		protein of unknown function DUF181
Clavibacter michiganensis strain PF008	28447.7	CP012573	fig|28447.7.peg.1537	AES38_07635		PATRIC.28447.7.CP012573.CDS.1620108.1621124.fwd	PATRIC	CDS	1620108	1621124	1017	+	FIG00058983	PLF_1573_00002610	PGF_00322249		338		ABC transporter (iron.B12.siderophore.hemin) , permease component
Clavibacter michiganensis strain PF008	28447.7	CP012573	fig|28447.7.peg.1538	AES38_07640		PATRIC.28447.7.CP012573.CDS.1621121.1621939.fwd	PATRIC	CDS	1621121	1621939	819	+	FIG00136665	PLF_1573_00003225	PGF_01251856		272		ABC transporter (iron.B12.siderophore.hemin) , ATP-binding component
Clavibacter michiganensis strain PF008	28447.7	CP012573	fig|28447.7.peg.1539	AES38_07645		PATRIC.28447.7.CP012573.CDS.1621936.1622949.fwd	PATRIC	CDS	1621936	1622949	1014	+		PLF_1573_00003539	PGF_00280770		337		ABC transporter (iron.B12.siderophore.hemin) , periplasmic substrate-binding component
Clavibacter michiganensis strain PF008	28447.7	CP012573	fig|28447.7.peg.1540	AES38_07650		PATRIC.28447.7.CP012573.CDS.1622942.1624219.fwd	PATRIC	CDS	1622942	1624219	1278	+	FIG00665232		PGF_00167288		425		FIG00665236: hypothetical protein
Clavibacter michiganensis strain PF008	28447.7	CP012573	fig|28447.7.peg.1541	AES38_07660		PATRIC.28447.7.CP012573.CDS.1624456.1625022.rev	PATRIC	CDS	1624456	1625022	567	-	FIG00000017	PLF_1573_00000597	PGF_00030656		188		Peptide deformylase (EC 3.5.1.88)
Clavibacter michiganensis strain PF008	28447.7	CP012573	fig|28447.7.peg.1542	AES38_07665		PATRIC.28447.7.CP012573.CDS.1625062.1625973.fwd	PATRIC	CDS	1625062	1625973	912	+	FIG01956050	PLF_1573_00001459	PGF_00014696		303		Integral membrane protein
Clavibacter michiganensis strain PF008	28447.7	CP012573	fig|28447.7.peg.1543	AES38_07670		PATRIC.28447.7.CP012573.CDS.1626132.1627391.fwd	PATRIC	CDS	1626132	1627391	1260	+	FIG00007960	PLF_1573_00000174	PGF_00009831		419		Glycosyltransferase
Clavibacter michiganensis strain PF008	28447.7	CP012573	fig|28447.7.peg.1544	AES38_07680		PATRIC.28447.7.CP012573.CDS.1627696.1629891.fwd	PATRIC	CDS	1627696	1629891	2196	+	FIG00511098	PLF_1573_00001506	PGF_00034424		731		Acyltransferase 3
Clavibacter michiganensis strain PF008	28447.7	CP012573	fig|28447.7.peg.1545	AES38_07685		PATRIC.28447.7.CP012573.CDS.1629942.1630397.fwd	PATRIC	CDS	1629942	1630397	456	+	FIG00638284	PLF_1573_00003541	PGF_00417774		151		3-demethylubiquinone-9 3-methyltransferase
Clavibacter michiganensis strain PF008	28447.7	CP012573	fig|28447.7.peg.1546	AES38_07690		PATRIC.28447.7.CP012573.CDS.1630488.1631492.rev	PATRIC	CDS	1630488	1631492	1005	-	FIG00027222	PLF_1573_00000322	PGF_00006725		334		GDP-L-fucose synthetase (EC 1.1.1.271)
Clavibacter michiganensis strain PF008	28447.7	CP012573	fig|28447.7.peg.1547	AES38_07695		PATRIC.28447.7.CP012573.CDS.1631489.1632541.rev	PATRIC	CDS	1631489	1632541	1053	-	FIG01318417	PLF_1573_00002823	PGF_00006731		350		GDP-mannose 4,6-dehydratase (EC 4.2.1.47)
Clavibacter michiganensis strain PF008	28447.7	CP012573	fig|28447.7.peg.1548	AES38_07700		PATRIC.28447.7.CP012573.CDS.1632703.1633989.fwd	PATRIC	CDS	1632703	1633989	1287	+	FIG00512532	PLF_1573_00002329	PGF_00009720		428		Glycosyltransferase
Clavibacter michiganensis strain PF008	28447.7	CP012573	fig|28447.7.peg.1549	AES38_07705		PATRIC.28447.7.CP012573.CDS.1633986.1634570.fwd	PATRIC	CDS	1633986	1634570	585	+	FIG01347841	PLF_1573_00000122	PGF_00027532		194		Acetyltransferase (isoleucine patch superfamily)
Clavibacter michiganensis strain PF008	28447.7	CP012573	fig|28447.7.peg.1550			PATRIC.28447.7.CP012573.CDS.1634578.1634724.rev	PATRIC	CDS	1634578	1634724	147	-					48		hypothetical protein
Clavibacter michiganensis strain PF008	28447.7	CP012573	fig|28447.7.peg.1551			PATRIC.28447.7.CP012573.CDS.1634776.1634943.fwd	PATRIC	CDS	1634776	1634943	168	+					55		hypothetical protein
Clavibacter michiganensis strain PF008	28447.7	CP012573	fig|28447.7.peg.1552			PATRIC.28447.7.CP012573.CDS.1635061.1636971.fwd	PATRIC	CDS	1635061	1636971	1911	+	FIG00638284				636		hypothetical protein
Clavibacter michiganensis strain PF008	28447.7	CP012573	fig|28447.7.peg.1553	AES38_07715		PATRIC.28447.7.CP012573.CDS.1637023.1638387.rev	PATRIC	CDS	1637023	1638387	1365	-	FIG00638284		PGF_00391307		454		hypothetical protein
Clavibacter michiganensis strain PF008	28447.7	CP012573	fig|28447.7.peg.1554	AES38_07720		PATRIC.28447.7.CP012573.CDS.1638525.1639616.fwd	PATRIC	CDS	1638525	1639616	1092	+	FIG00638284				363		hypothetical protein
Clavibacter michiganensis strain PF008	28447.7	CP012573	fig|28447.7.peg.1555	AES38_07725		PATRIC.28447.7.CP012573.CDS.1639613.1640851.fwd	PATRIC	CDS	1639613	1640851	1239	+	FIG00638284				412		hypothetical protein
Clavibacter michiganensis strain PF008	28447.7	CP012573	fig|28447.7.peg.1556			PATRIC.28447.7.CP012573.CDS.1640833.1641591.rev	PATRIC	CDS	1640833	1641591	759	-	FIG00638284				252		hypothetical protein
Clavibacter michiganensis strain PF008	28447.7	CP012573	fig|28447.7.peg.1557	AES38_07730		PATRIC.28447.7.CP012573.CDS.1641601.1641867.fwd	PATRIC	CDS	1641601	1641867	267	+					88		hypothetical protein
Clavibacter michiganensis strain PF008	28447.7	CP012573	fig|28447.7.peg.1558	AES38_07735		PATRIC.28447.7.CP012573.CDS.1642009.1643319.rev	PATRIC	CDS	1642009	1643319	1311	-	FIG00638284				436		hypothetical protein
Clavibacter michiganensis strain PF008	28447.7	CP012573	fig|28447.7.peg.1559			PATRIC.28447.7.CP012573.CDS.1643319.1643441.rev	PATRIC	CDS	1643319	1643441	123	-					40		hypothetical protein
Clavibacter michiganensis strain PF008	28447.7	CP012573	fig|28447.7.peg.1560	AES38_07740		PATRIC.28447.7.CP012573.CDS.1643441.1644946.rev	PATRIC	CDS	1643441	1644946	1506	-	FIG00002968	PLF_1573_00001706	PGF_00041054		501		Putative glycosyltransferase
Clavibacter michiganensis strain PF008	28447.7	CP012573	fig|28447.7.peg.1561	AES38_07745		PATRIC.28447.7.CP012573.CDS.1645145.1645432.rev	PATRIC	CDS	1645145	1645432	288	-	FIG00511221	PLF_1573_00002087	PGF_01251408		95		FIG00511223: hypothetical protein
Clavibacter michiganensis strain PF008	28447.7	CP012573	fig|28447.7.peg.1562	AES38_07750		PATRIC.28447.7.CP012573.CDS.1645574.1645777.rev	PATRIC	CDS	1645574	1645777	204	-	FIG00004100	PLF_1573_00000492	PGF_00418567		67		Cold shock protein CspA
Clavibacter michiganensis strain PF008	28447.7	CP012573	fig|28447.7.peg.1563	AES38_07755		PATRIC.28447.7.CP012573.CDS.1646035.1647705.fwd	PATRIC	CDS	1646035	1647705	1671	+	FIG00000404	PLF_1573_00001417	PGF_00421471		556		DNA polymerase I (EC 2.7.7.7)
Clavibacter michiganensis strain PF008	28447.7	CP012573	fig|28447.7.peg.1564	AES38_07760		PATRIC.28447.7.CP012573.CDS.1647775.1647963.rev	PATRIC	CDS	1647775	1647963	189	-	FIG00638284	PLF_1573_00002267	PGF_01251491		62		hypothetical protein
Clavibacter michiganensis strain PF008	28447.7	CP012573	fig|28447.7.peg.1565	AES38_07765		PATRIC.28447.7.CP012573.CDS.1648071.1648934.fwd	PATRIC	CDS	1648071	1648934	864	+	FIG00511858	PLF_1573_00002086	PGF_00251055		287		FIG00511859: hypothetical protein
Clavibacter michiganensis strain PF008	28447.7	CP012573	fig|28447.7.peg.1566	AES38_07770		PATRIC.28447.7.CP012573.CDS.1648936.1649538.rev	PATRIC	CDS	1648936	1649538	603	-	FIG00002474	PLF_1573_00000791	PGF_00059746		200		Transcriptional regulator, PadR family
Clavibacter michiganensis strain PF008	28447.7	CP012573	fig|28447.7.peg.1567			PATRIC.28447.7.CP012573.CDS.1649581.1649697.rev	PATRIC	CDS	1649581	1649697	117	-					38		hypothetical protein
Clavibacter michiganensis strain PF008	28447.7	CP012573	fig|28447.7.peg.1568	AES38_07775		PATRIC.28447.7.CP012573.CDS.1649803.1650321.fwd	PATRIC	CDS	1649803	1650321	519	+	FIG00512276	PLF_1573_00000928	PGF_00251055		172		FIG00512277: hypothetical protein
Clavibacter michiganensis strain PF008	28447.7	CP012573	fig|28447.7.peg.1569	AES38_07780		PATRIC.28447.7.CP012573.CDS.1650415.1651656.rev	PATRIC	CDS	1650415	1651656	1242	-	FIG00002246	PLF_1573_00000460	PGF_00421030		413		3-oxoacyl-[acyl-carrier-protein] synthase, KASII (EC 2.3.1.179)
Clavibacter michiganensis strain PF008	28447.7	CP012573	fig|28447.7.peg.1570	AES38_07785		PATRIC.28447.7.CP012573.CDS.1651739.1651987.rev	PATRIC	CDS	1651739	1651987	249	-	FIG00002328	PLF_1573_00002280	PGF_00030189		82		Acyl carrier protein
Clavibacter michiganensis strain PF008	28447.7	CP012573	fig|28447.7.peg.1571	AES38_07790		PATRIC.28447.7.CP012573.CDS.1652041.1653054.rev	PATRIC	CDS	1652041	1653054	1014	-	FIG00780945	PLF_1573_00001125	PGF_00421056		337		3-oxoacyl-[acyl-carrier-protein] synthase, KASIII (EC 2.3.1.180)
[truncated: 1,573 more rows]
